# Supplementary material for: Synthesis of β-Carbolines with Electrocyclic Cyclization of 3-Nitrovinylindoles
Source: MDPI journal article supplement (doi:10.3390/ijms241713107), 2023-08-23

# Synthesis of $\beta$ -Carbolines through an Electrocyclic Cyclization of 3-Nitrovinylindoles

Nicolai A. Aksenov,<sup>1,\*</sup> Nikolai A. Arutiunov,<sup>1</sup> Alexander V. Aksenov,<sup>1</sup> Nikita K. Kirilov,<sup>1</sup> Inna V. Aksenova,<sup>1</sup> Dmitrii A. Aksenov,<sup>1</sup> Elena V. Aleksandrova,<sup>1</sup> Michael Rubin<sup>1</sup> and Alexander Kornienko<sup>2,\*</sup>

<sup>1</sup> Department of Chemistry, North Caucasus Federal University, 1a Pushkin St., Stavropol 355009, Russia

<sup>2</sup> Department of Chemistry and Biochemistry, Texas State University, 601 University Dr., San Marcos, Texas 78666, USA

\* To whom correspondence should be addressed: [naksenov@ncfu.edu](mailto:naksenov@ncfu.edu); [a\\_k76@txstate.edu](mailto:a_k76@txstate.edu)

## Supplementary Materials

|                                                                                                                           |     |
|---------------------------------------------------------------------------------------------------------------------------|-----|
| NMR Spectral Charts.....                                                                                                  | S2  |
| <sup>1</sup> H NMR Spectral Charts for starting (2-nitrovinyl)benzenes ( <b>18</b> ).....                                 | S2  |
| <sup>1</sup> H and <sup>13</sup> C Spectral Charts for starting indole ( <b>14r</b> ) .....                               | S4  |
| <sup>1</sup> H and <sup>13</sup> C { <sup>1</sup> H} Spectral Charts for starting 3-nitrovinylindoles ( <b>10</b> ) ..... | S6  |
| <sup>1</sup> H and <sup>13</sup> C { <sup>1</sup> H} Spectral Charts for 9H-pyrido[3,4-b]indoles ( <b>12</b> ).....       | S27 |

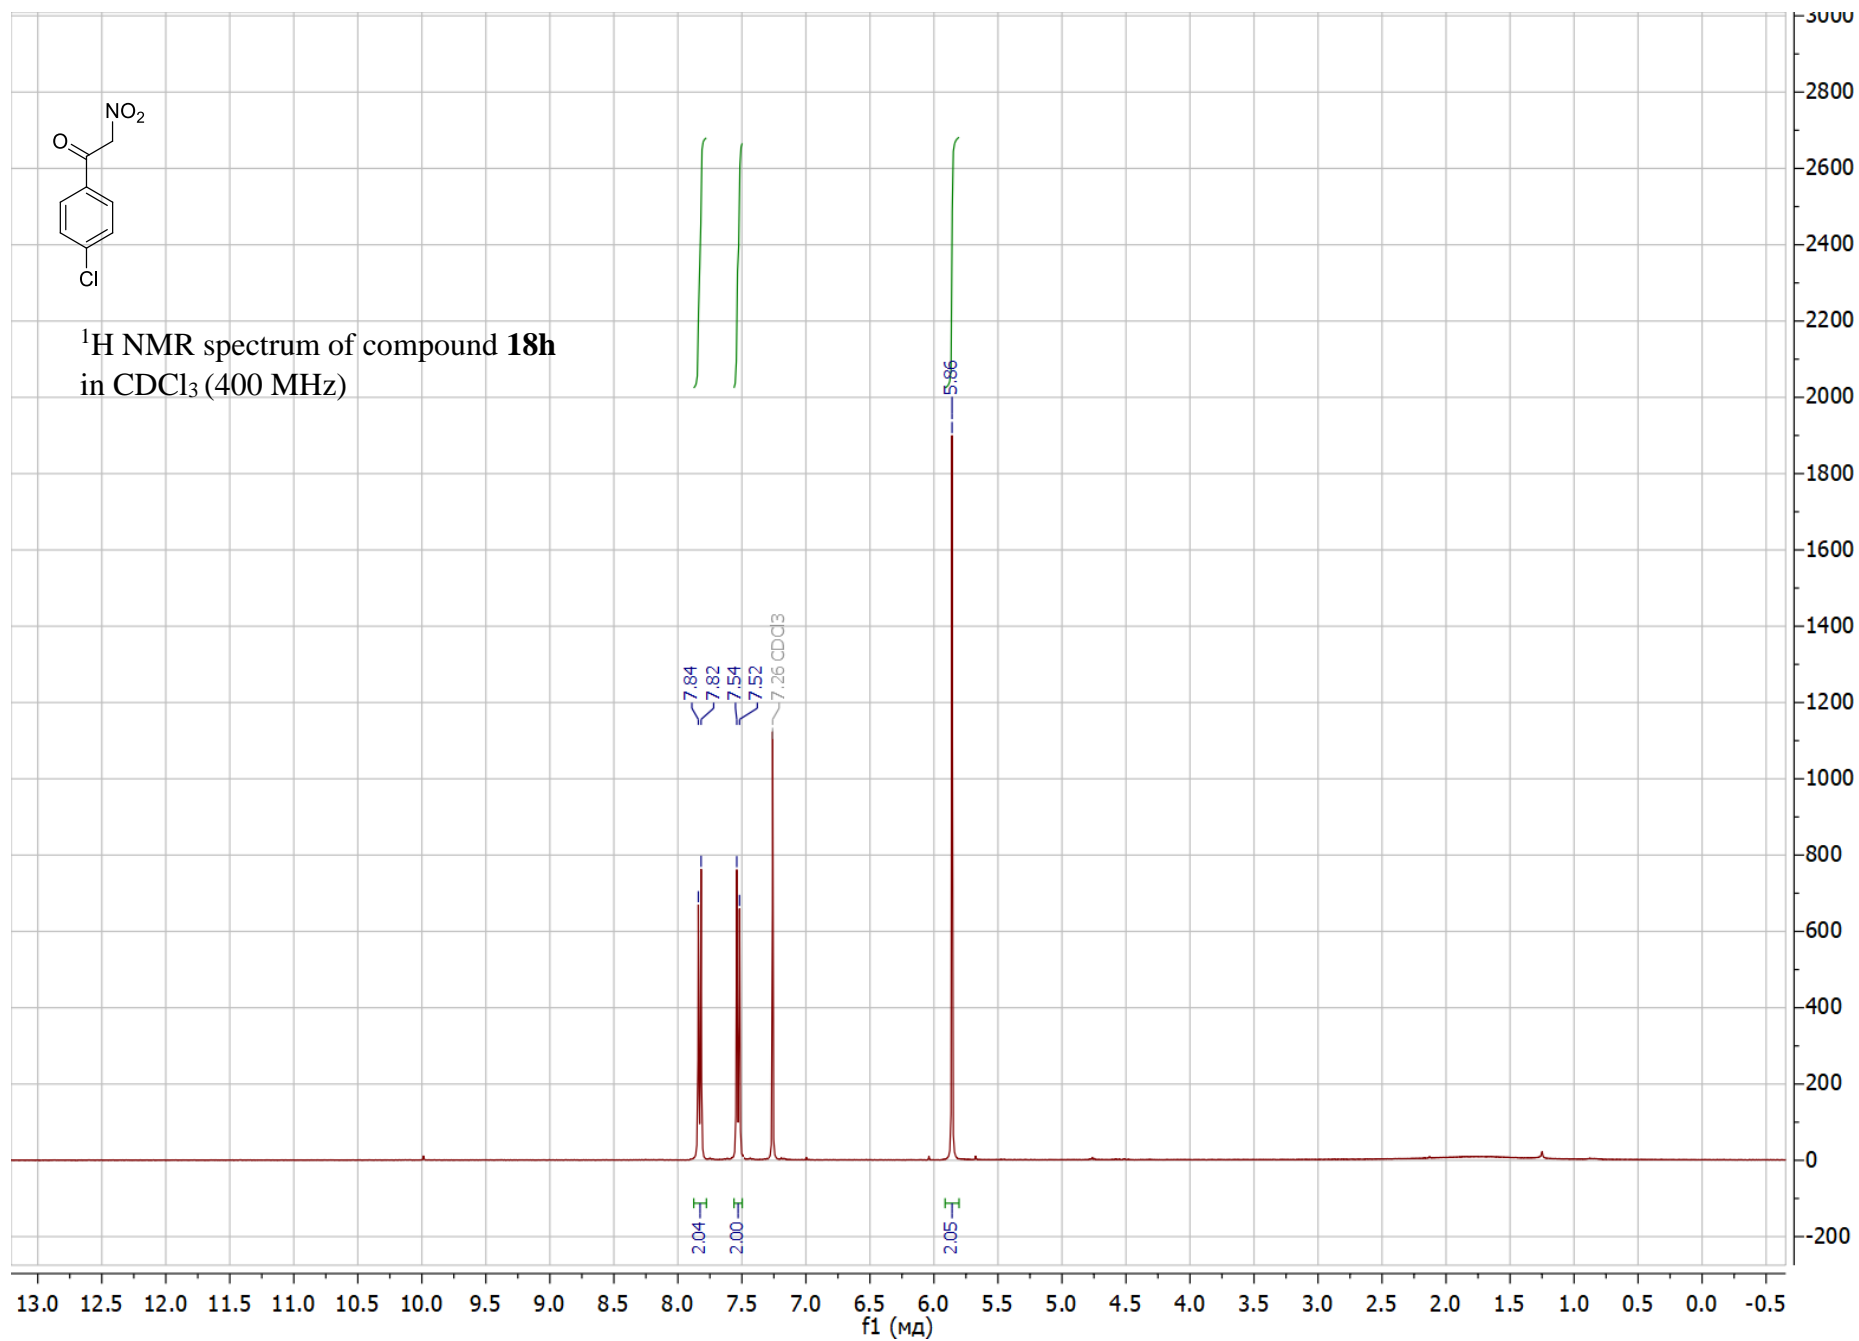

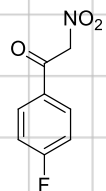

$^1\text{H}$  NMR spectrum of compound **18g**  
in  $\text{CDCl}_3$  (400 MHz)

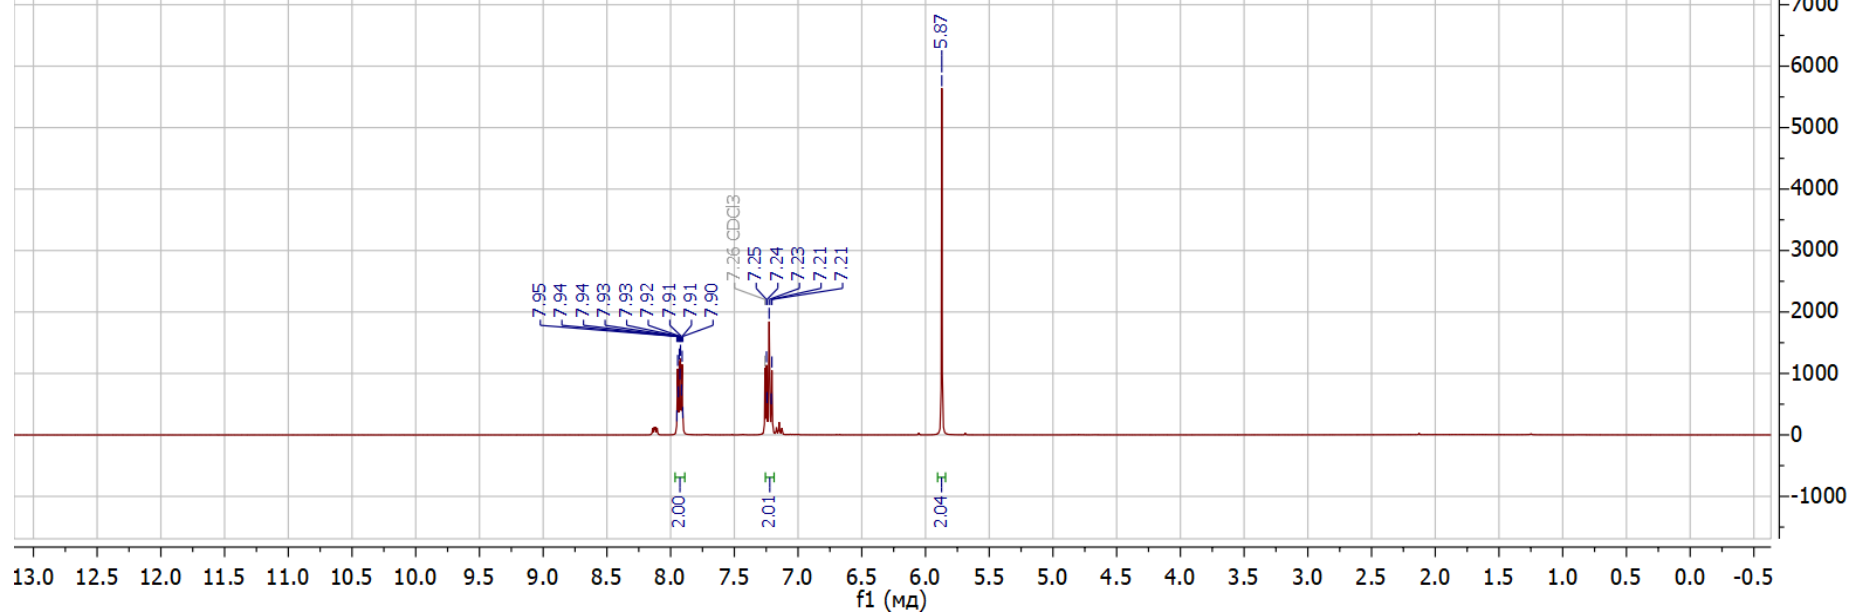

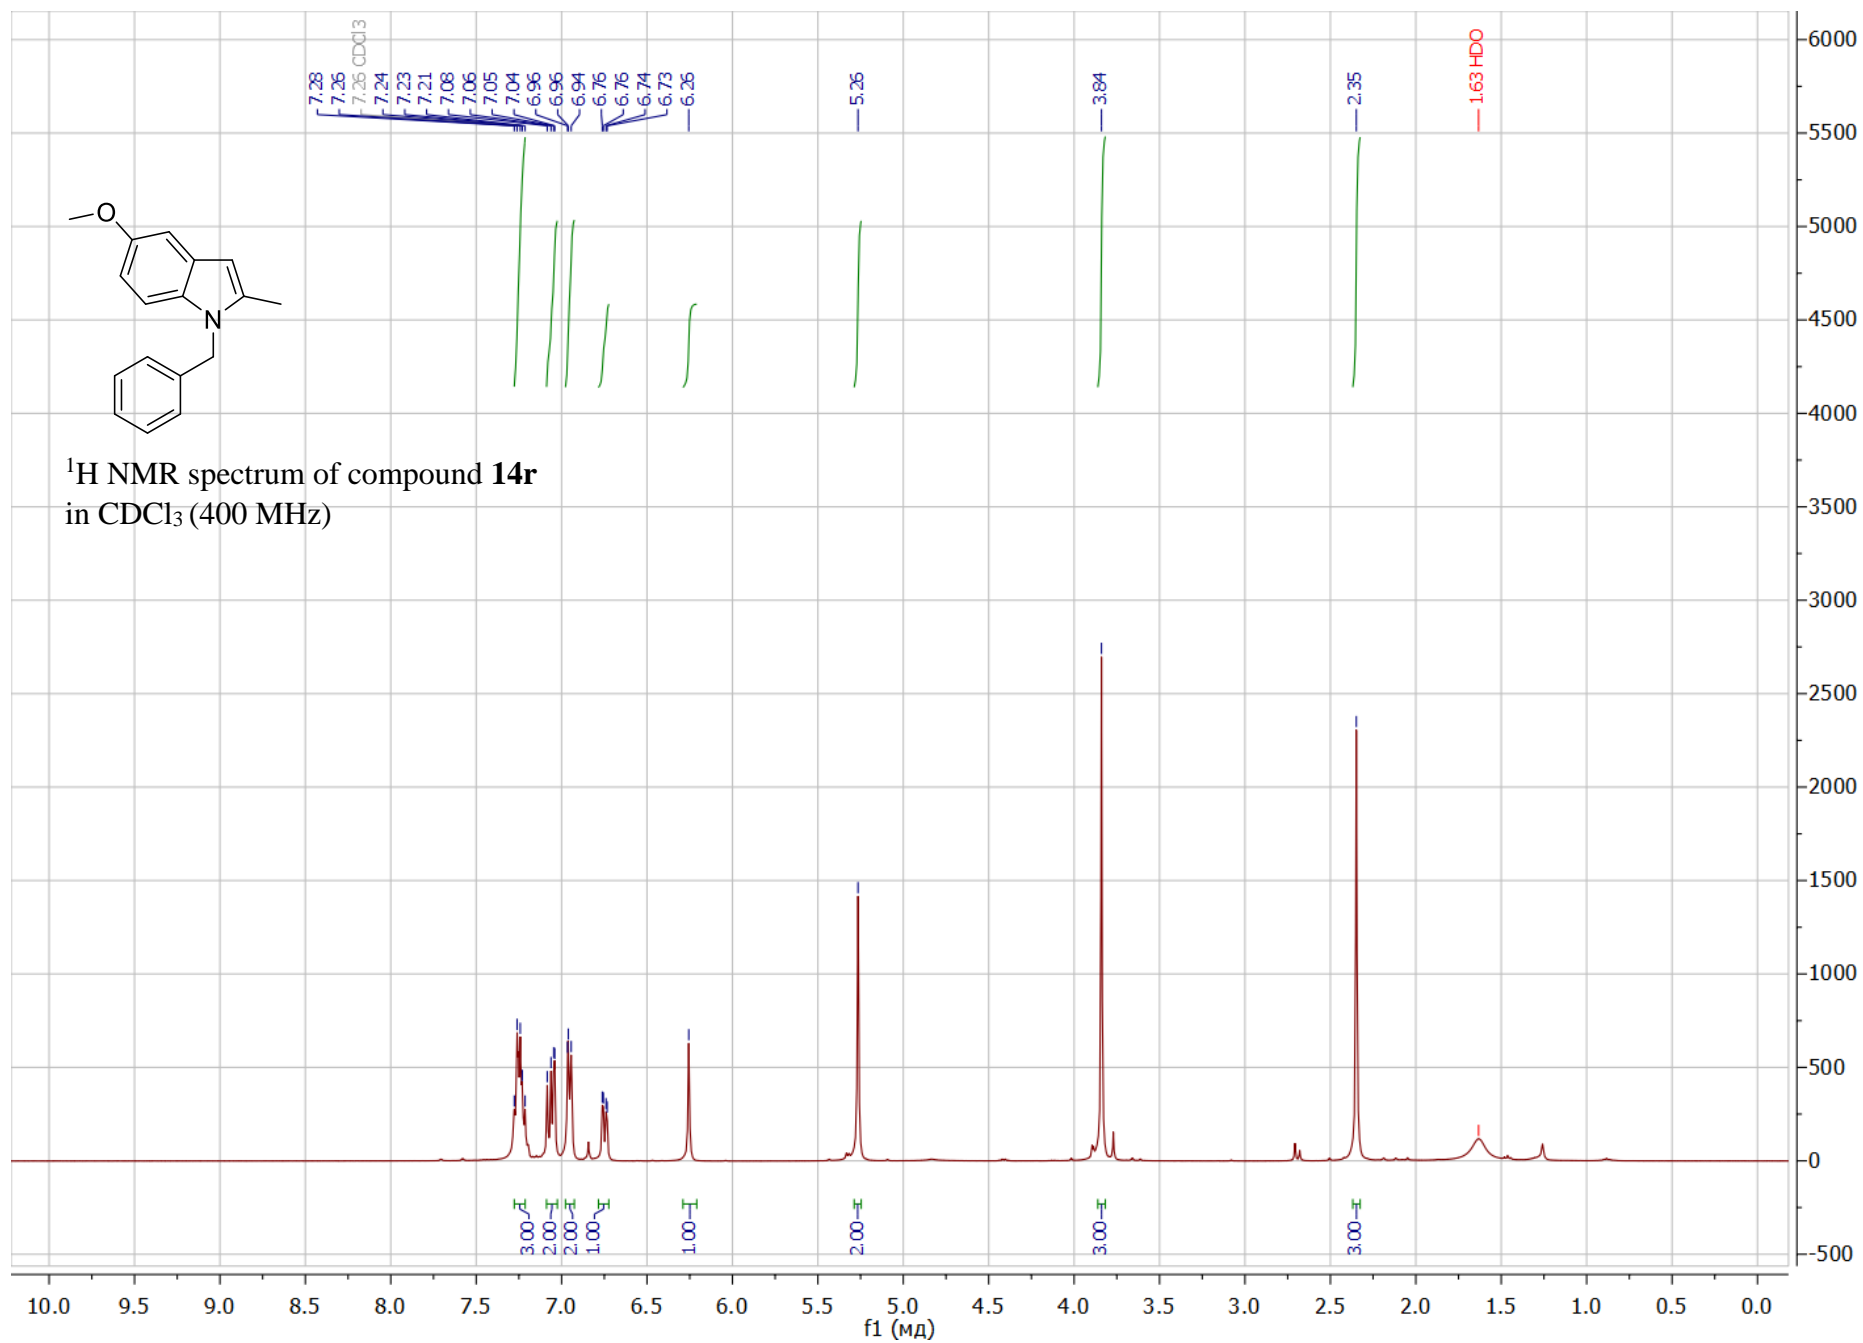

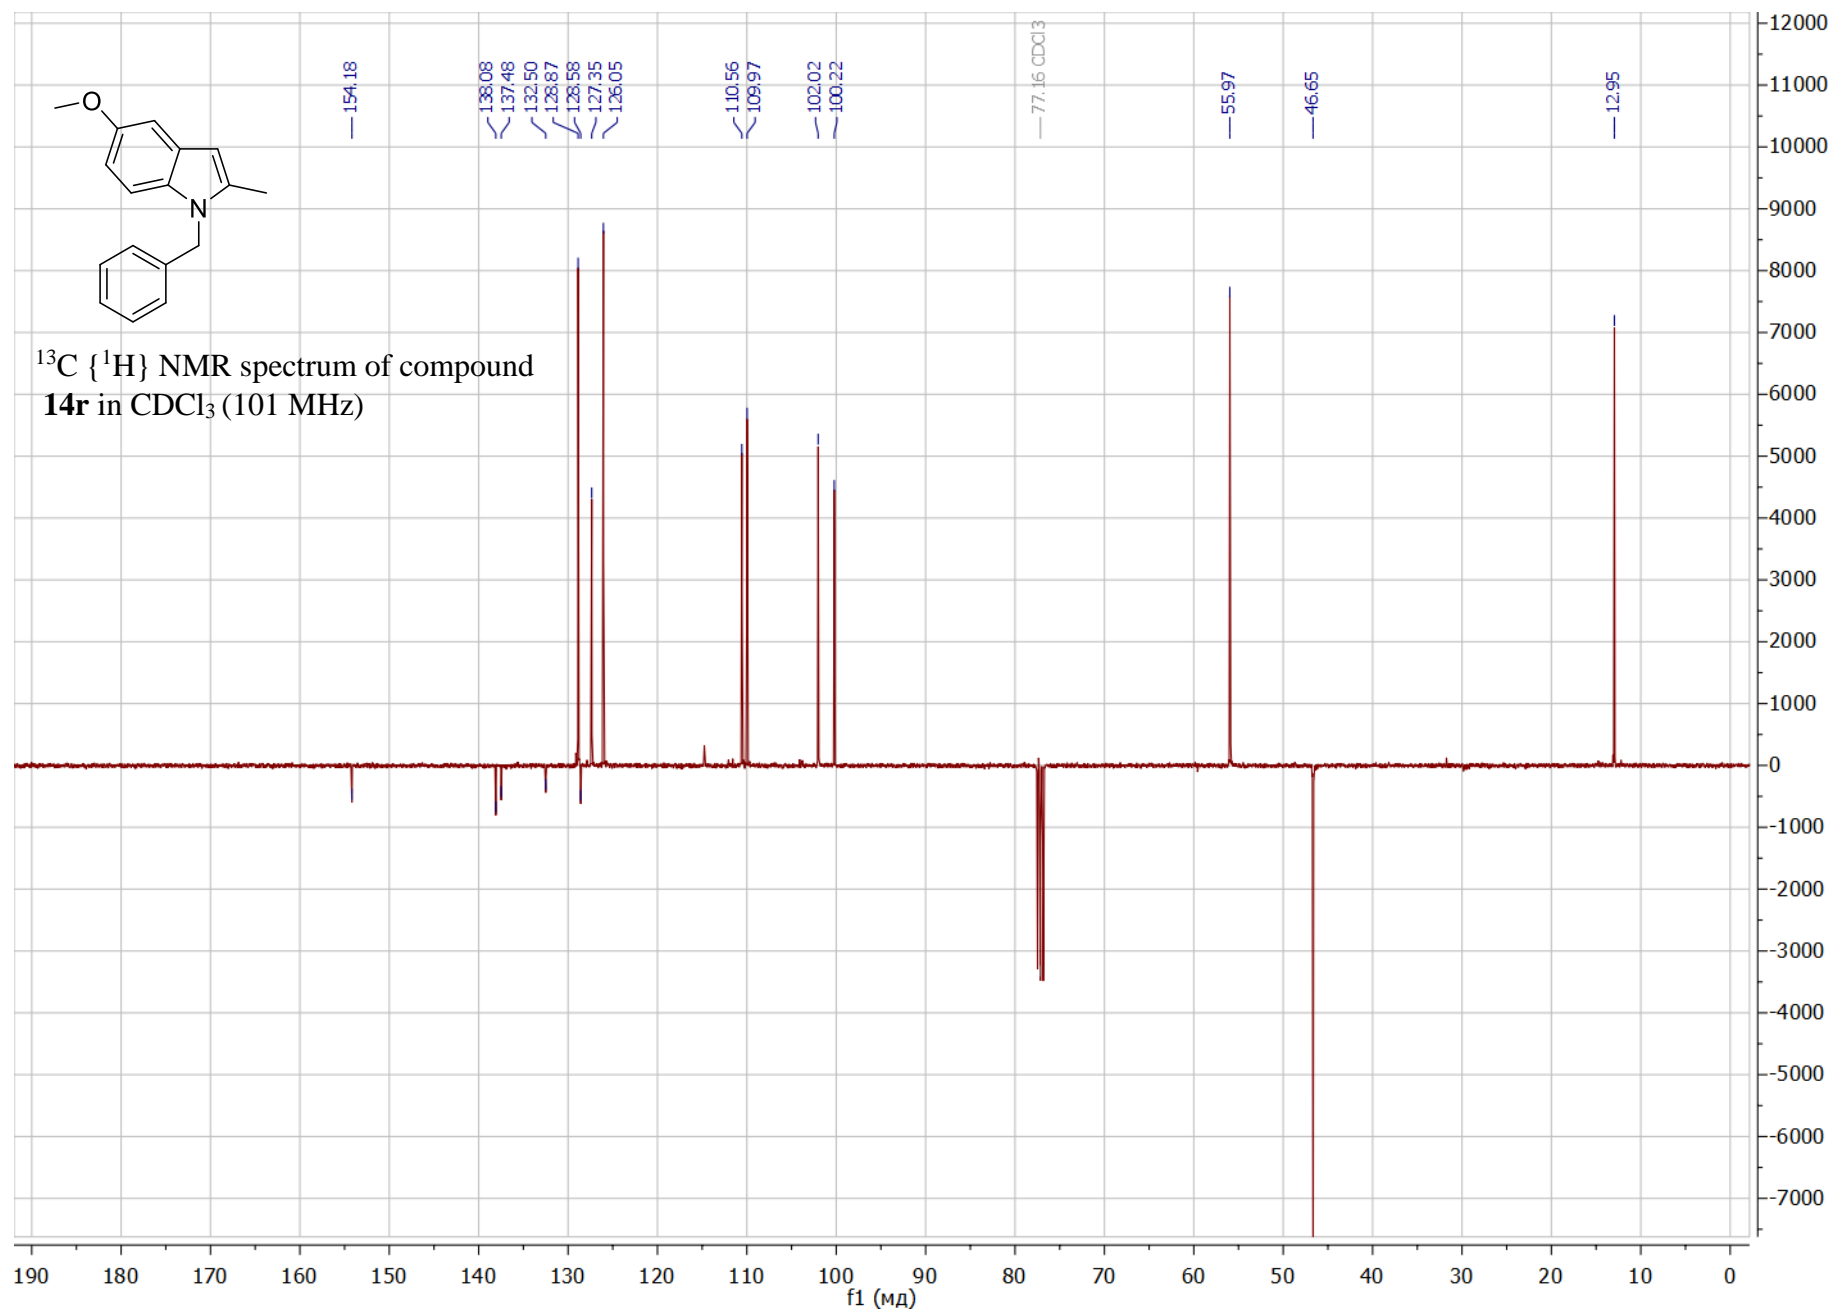

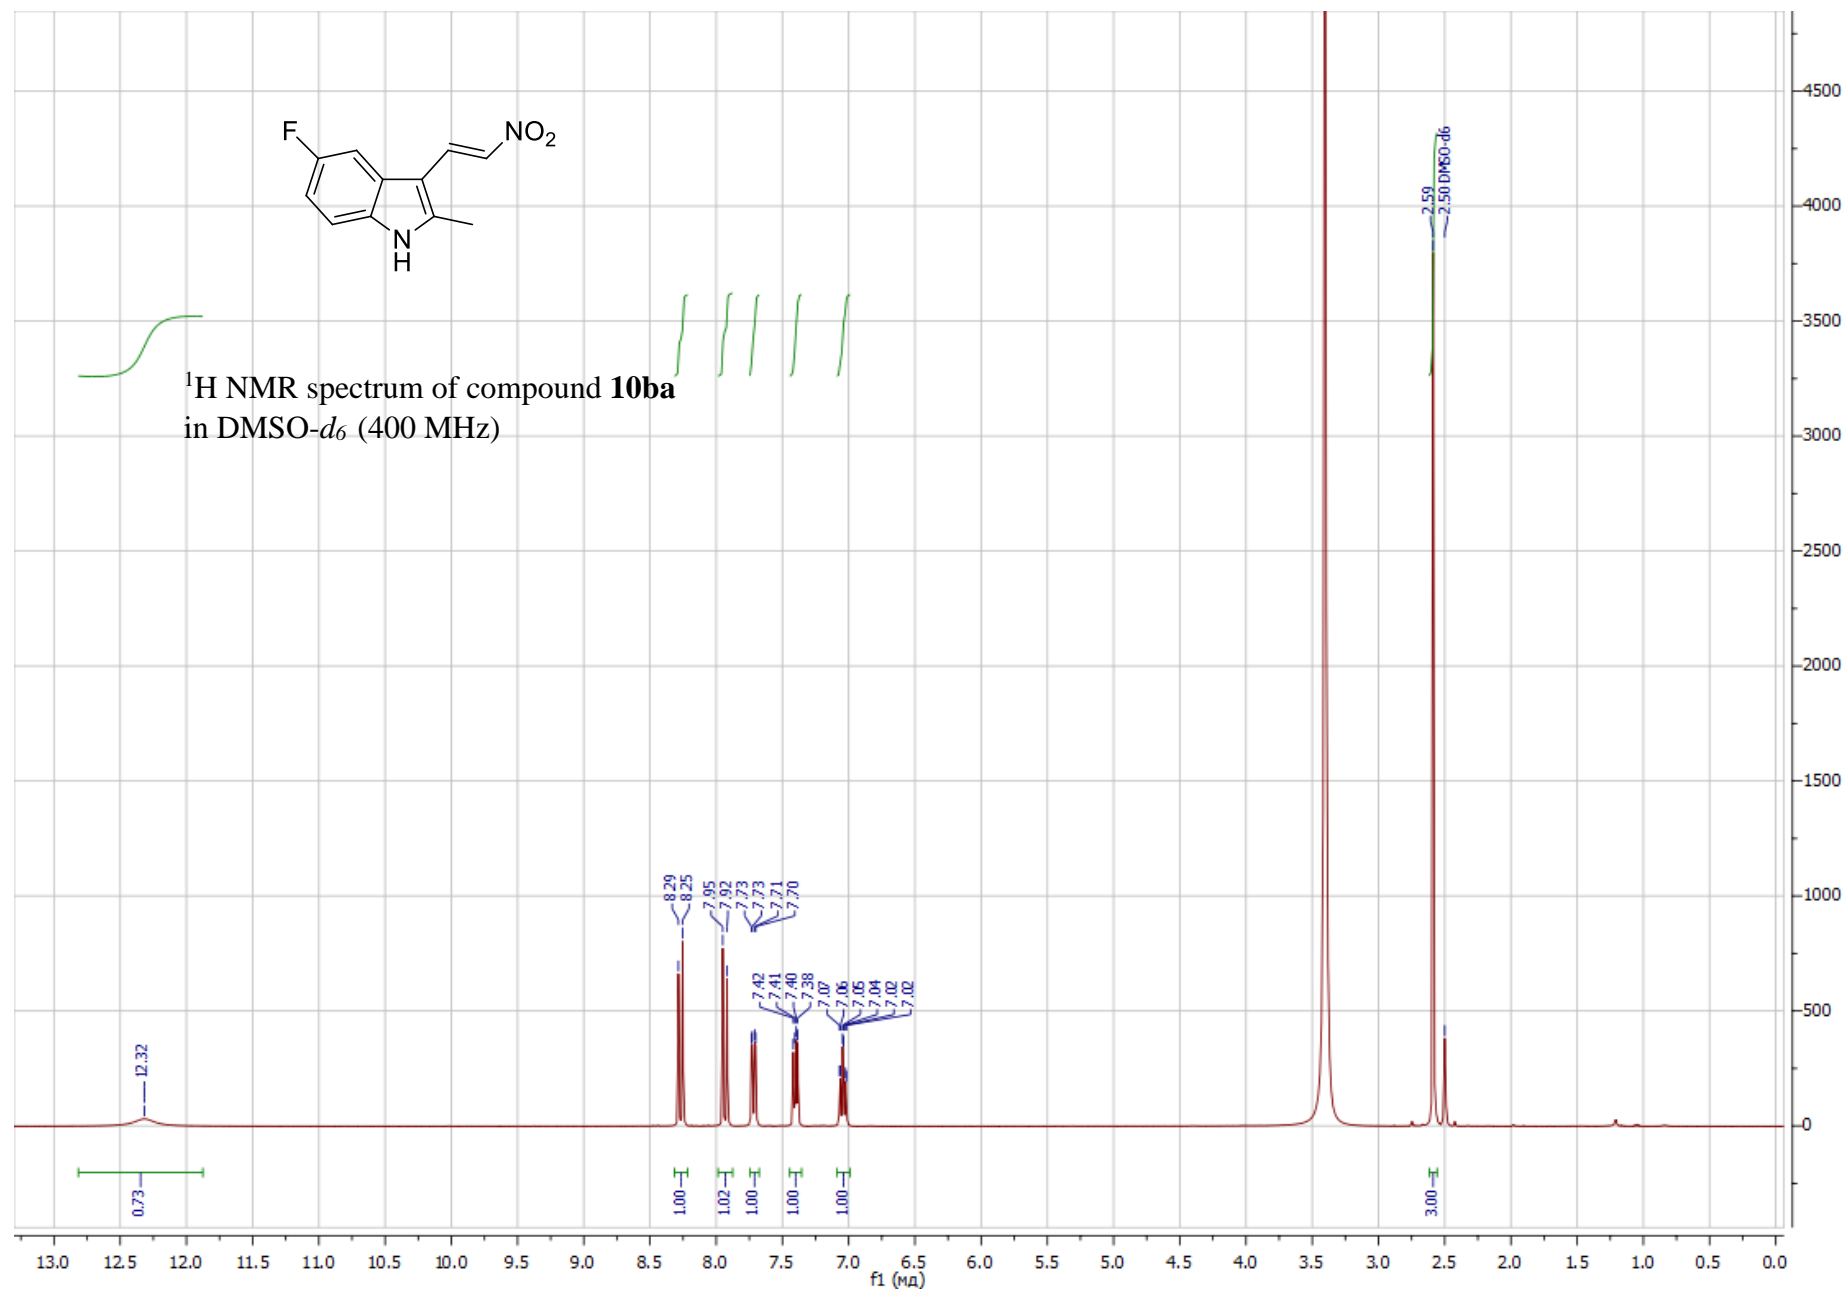

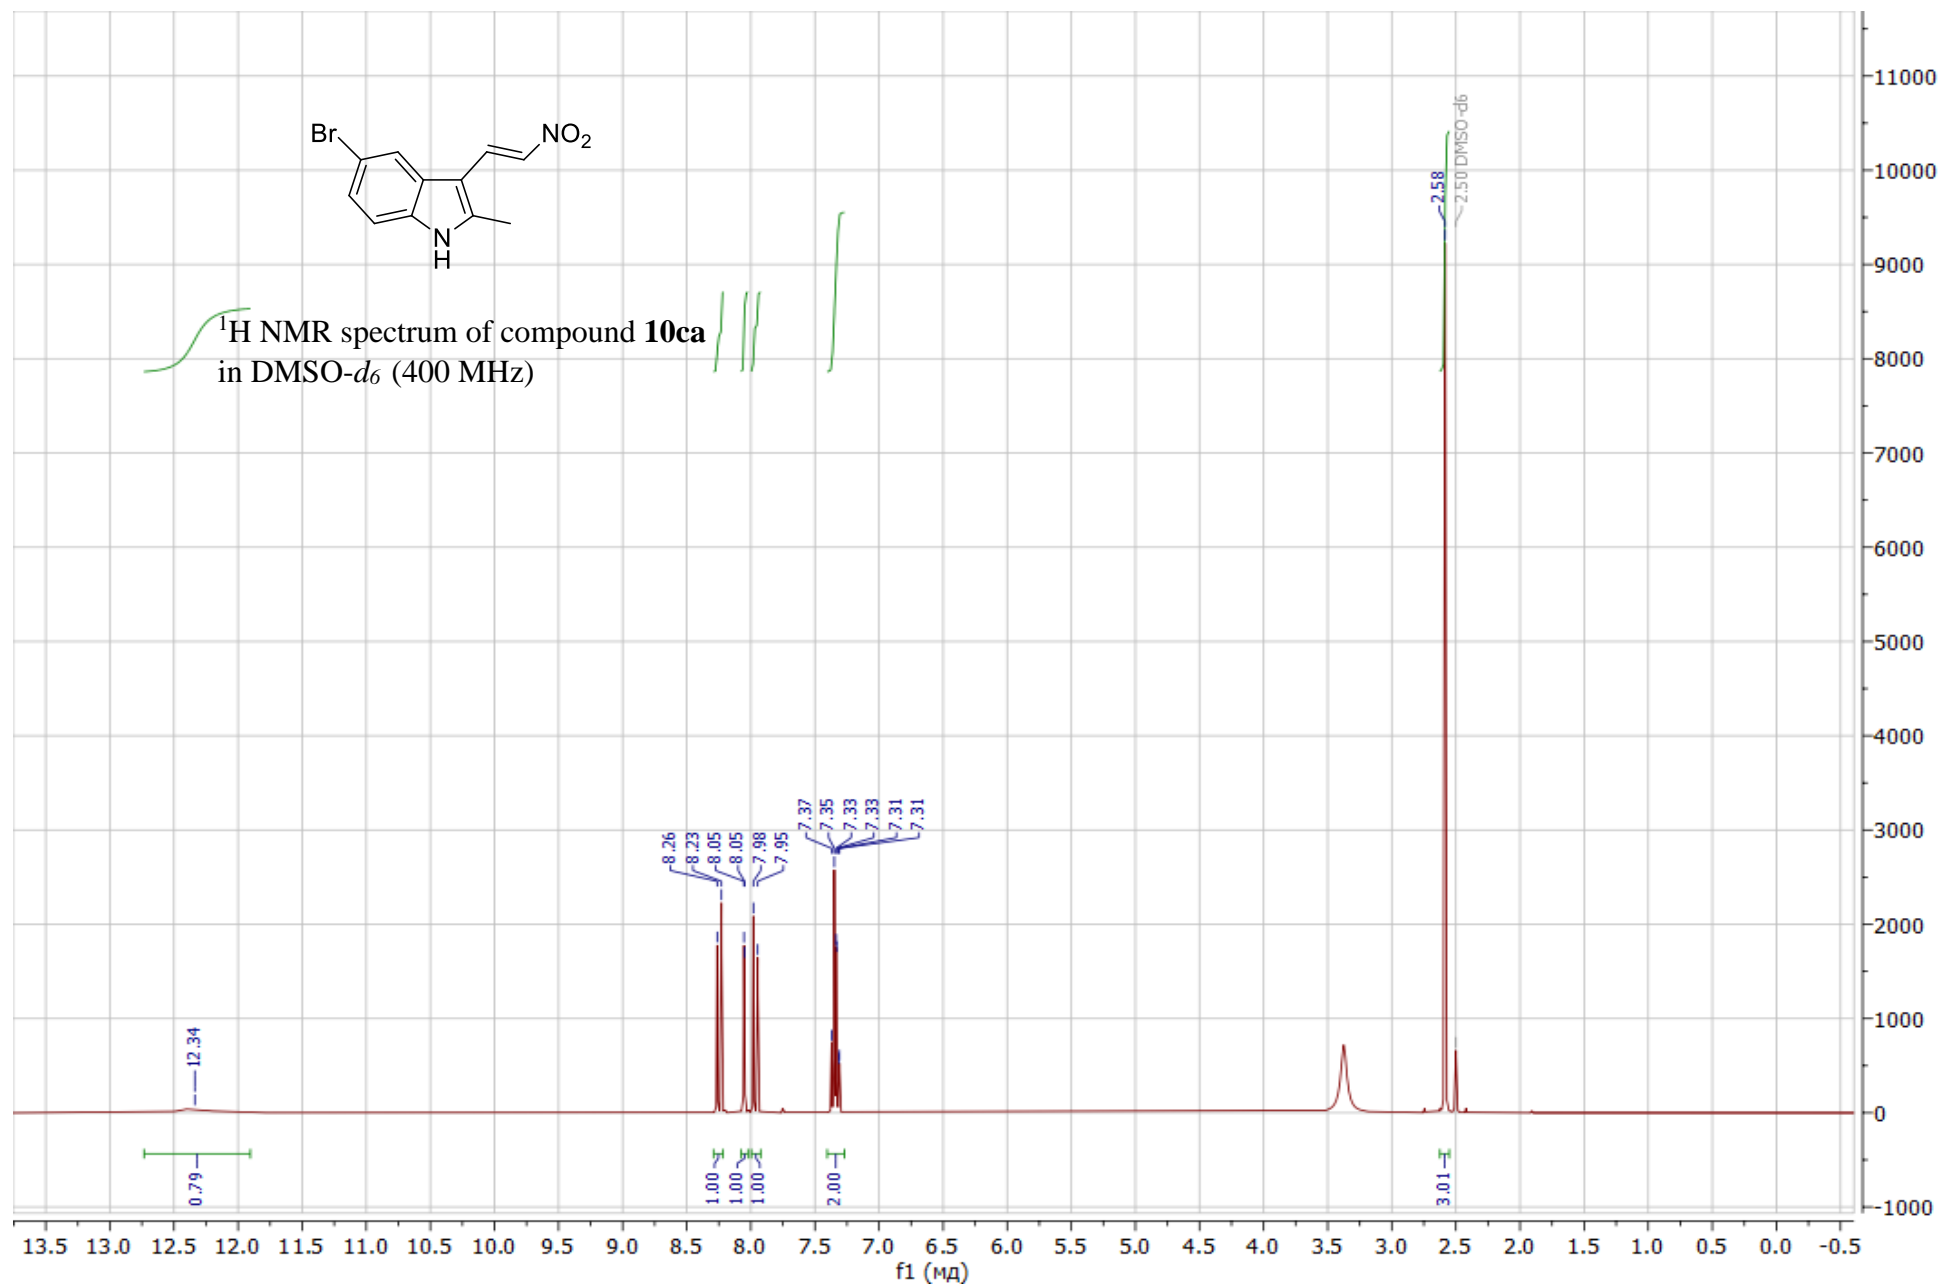





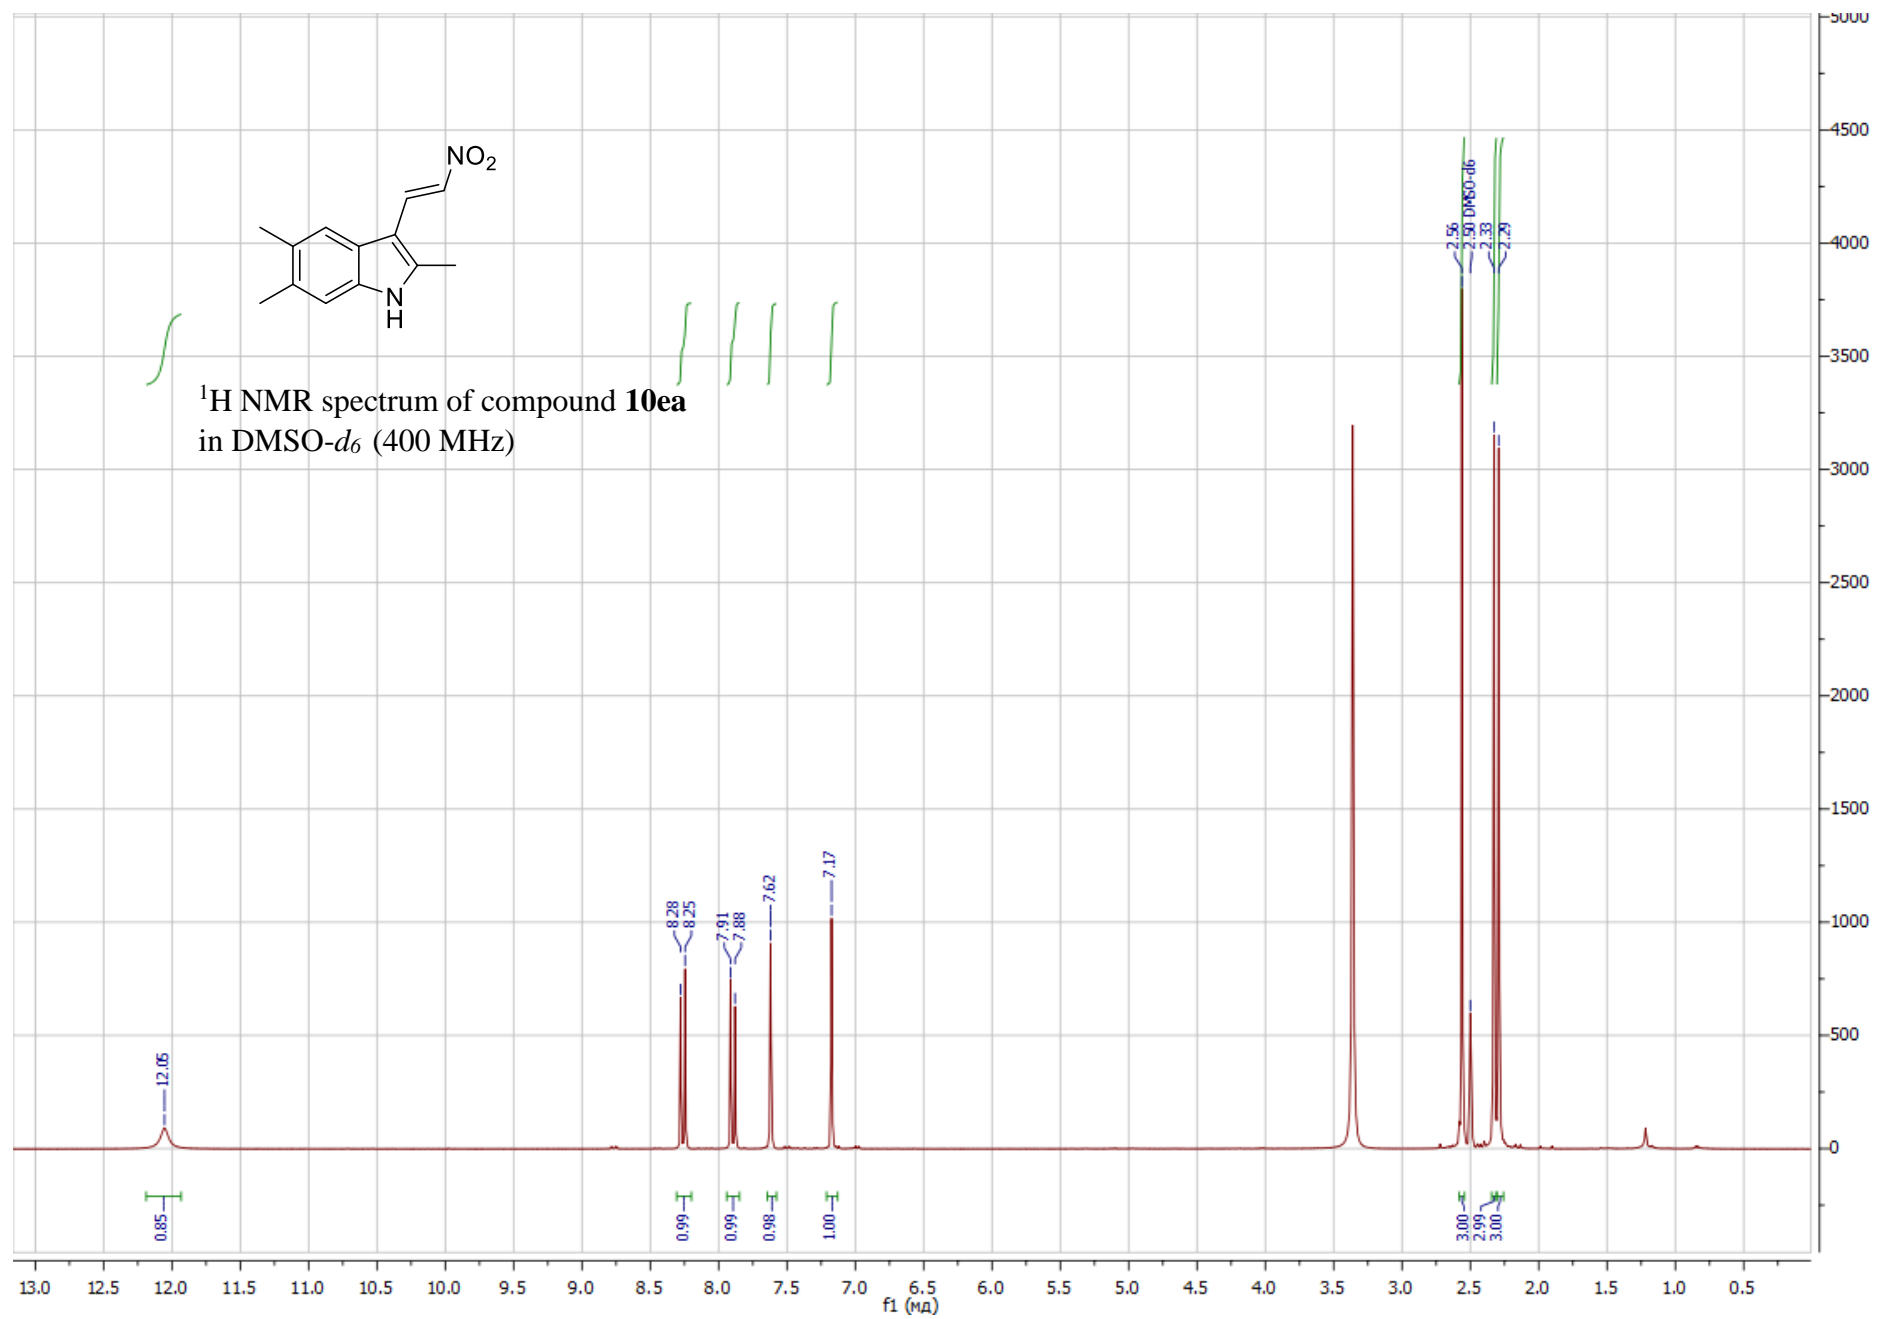

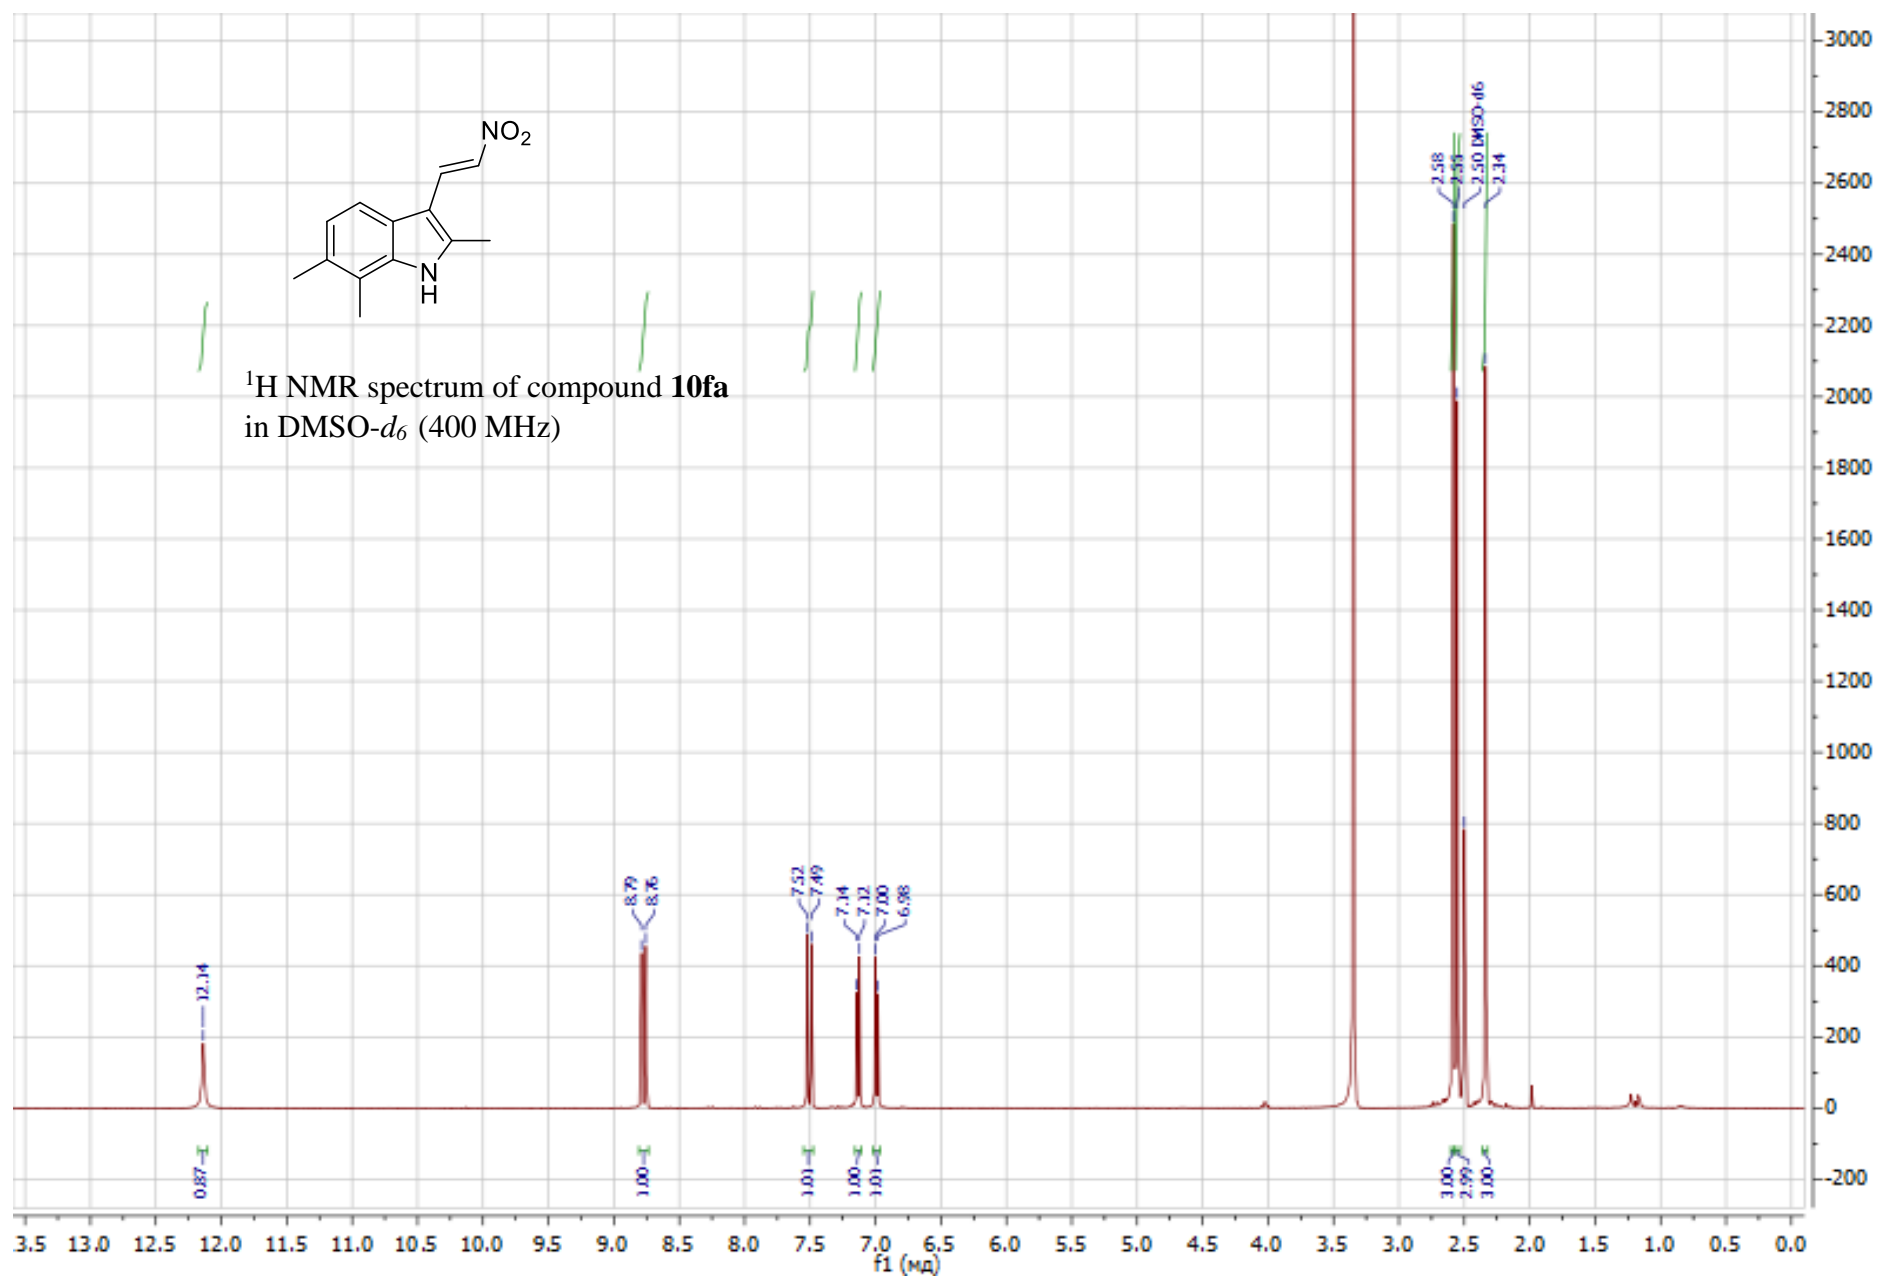

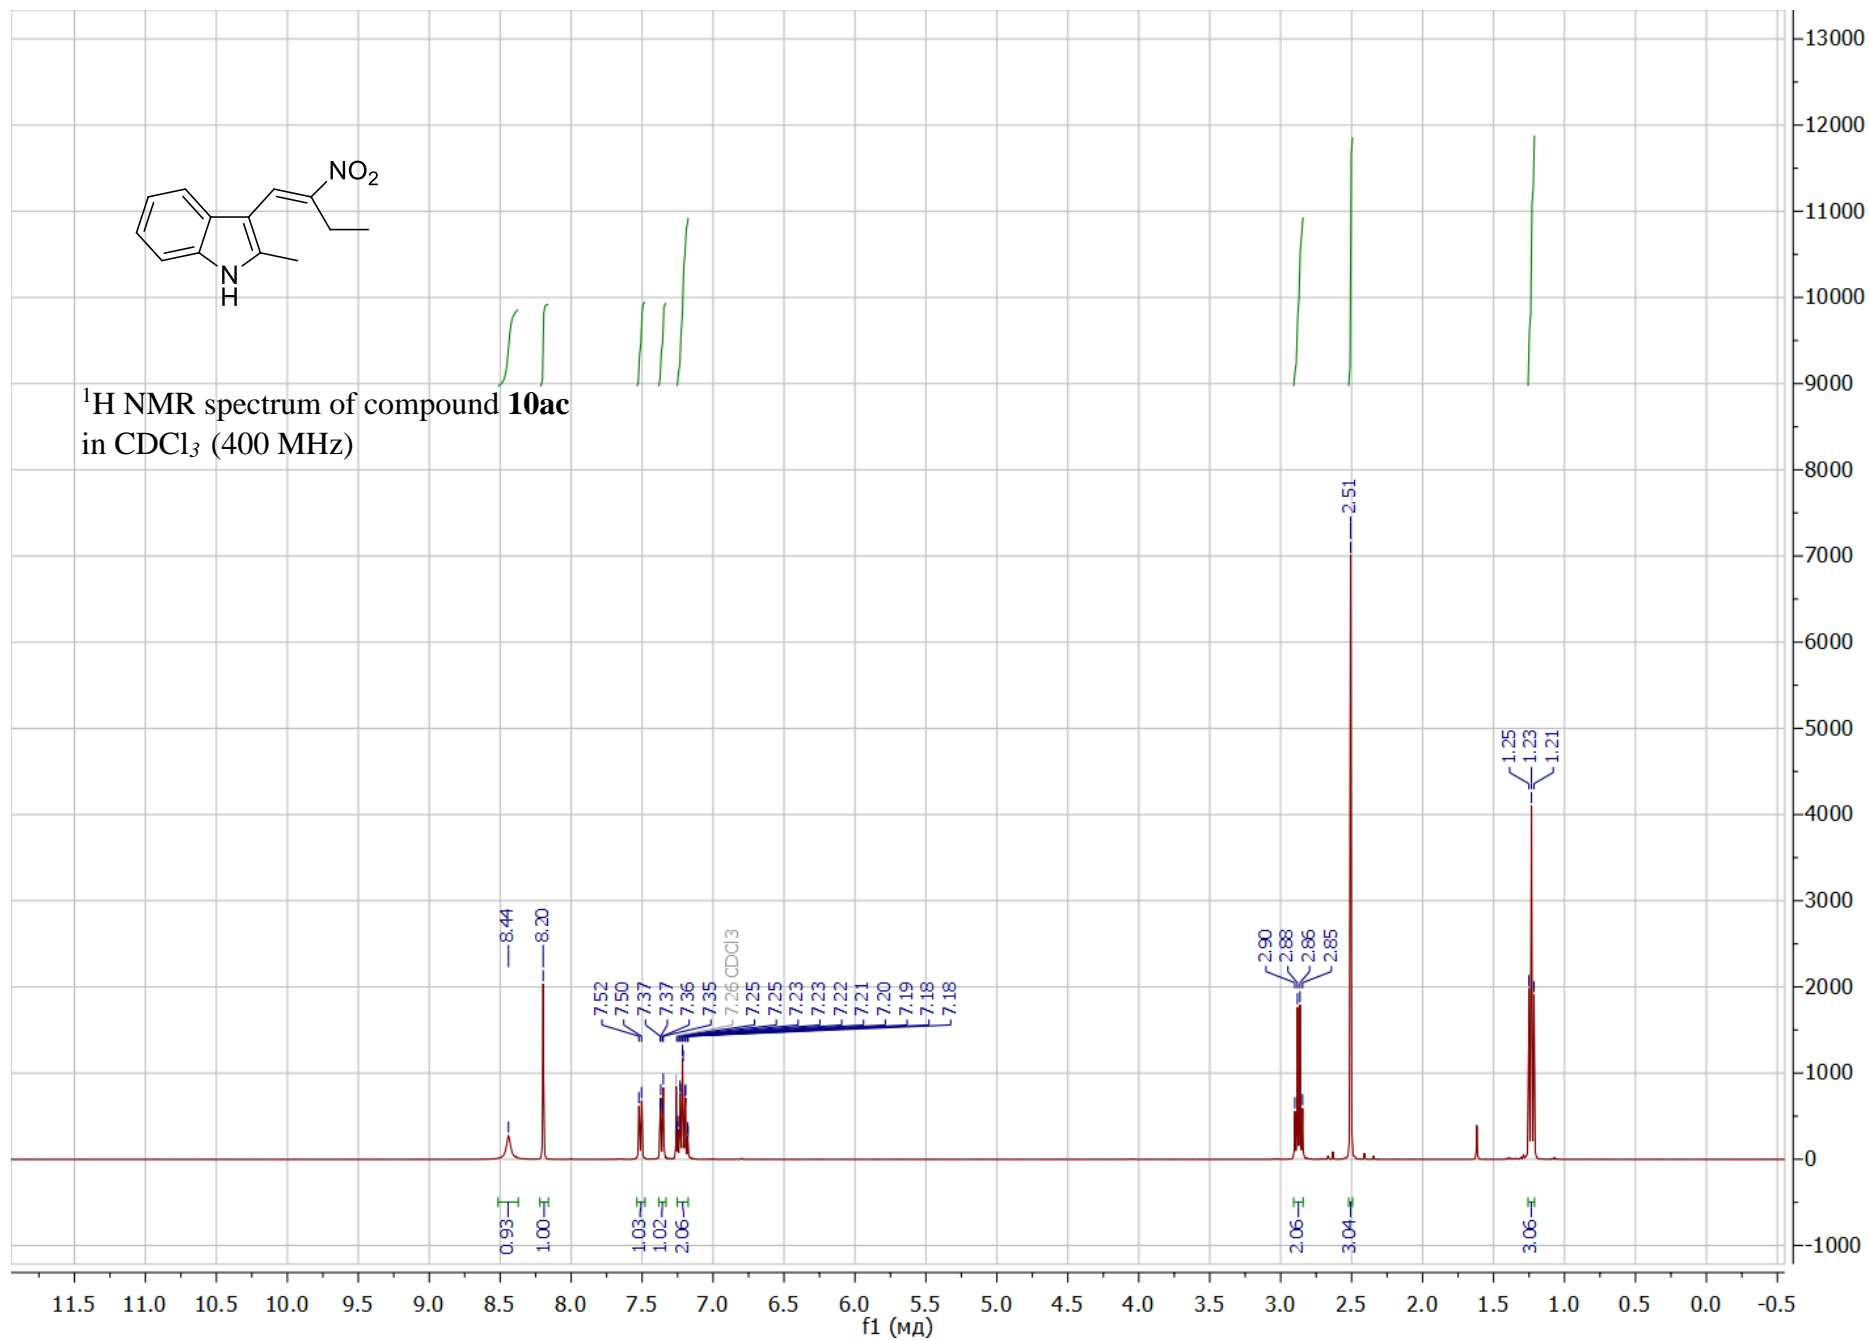

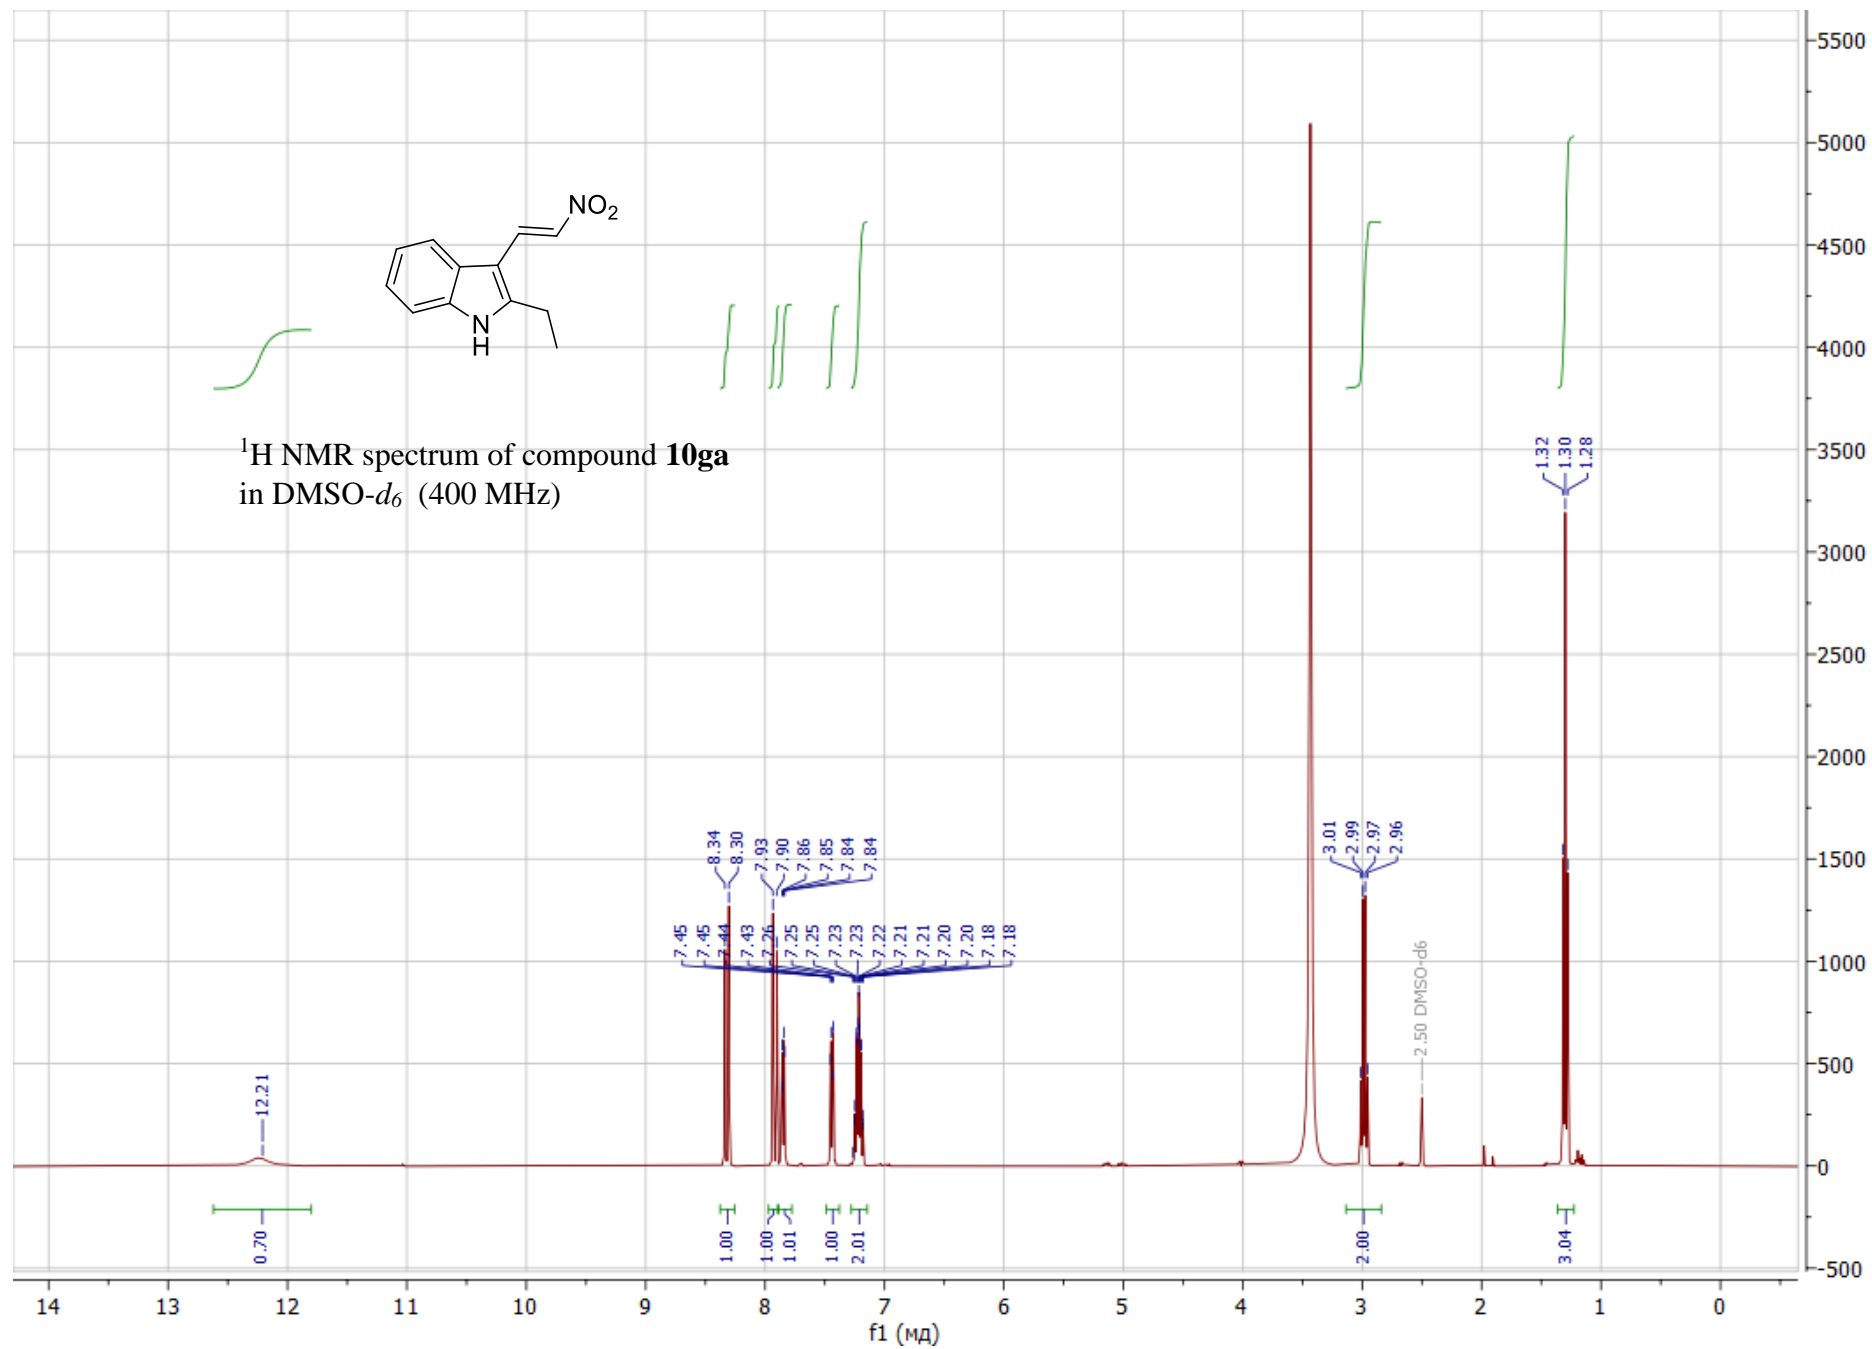

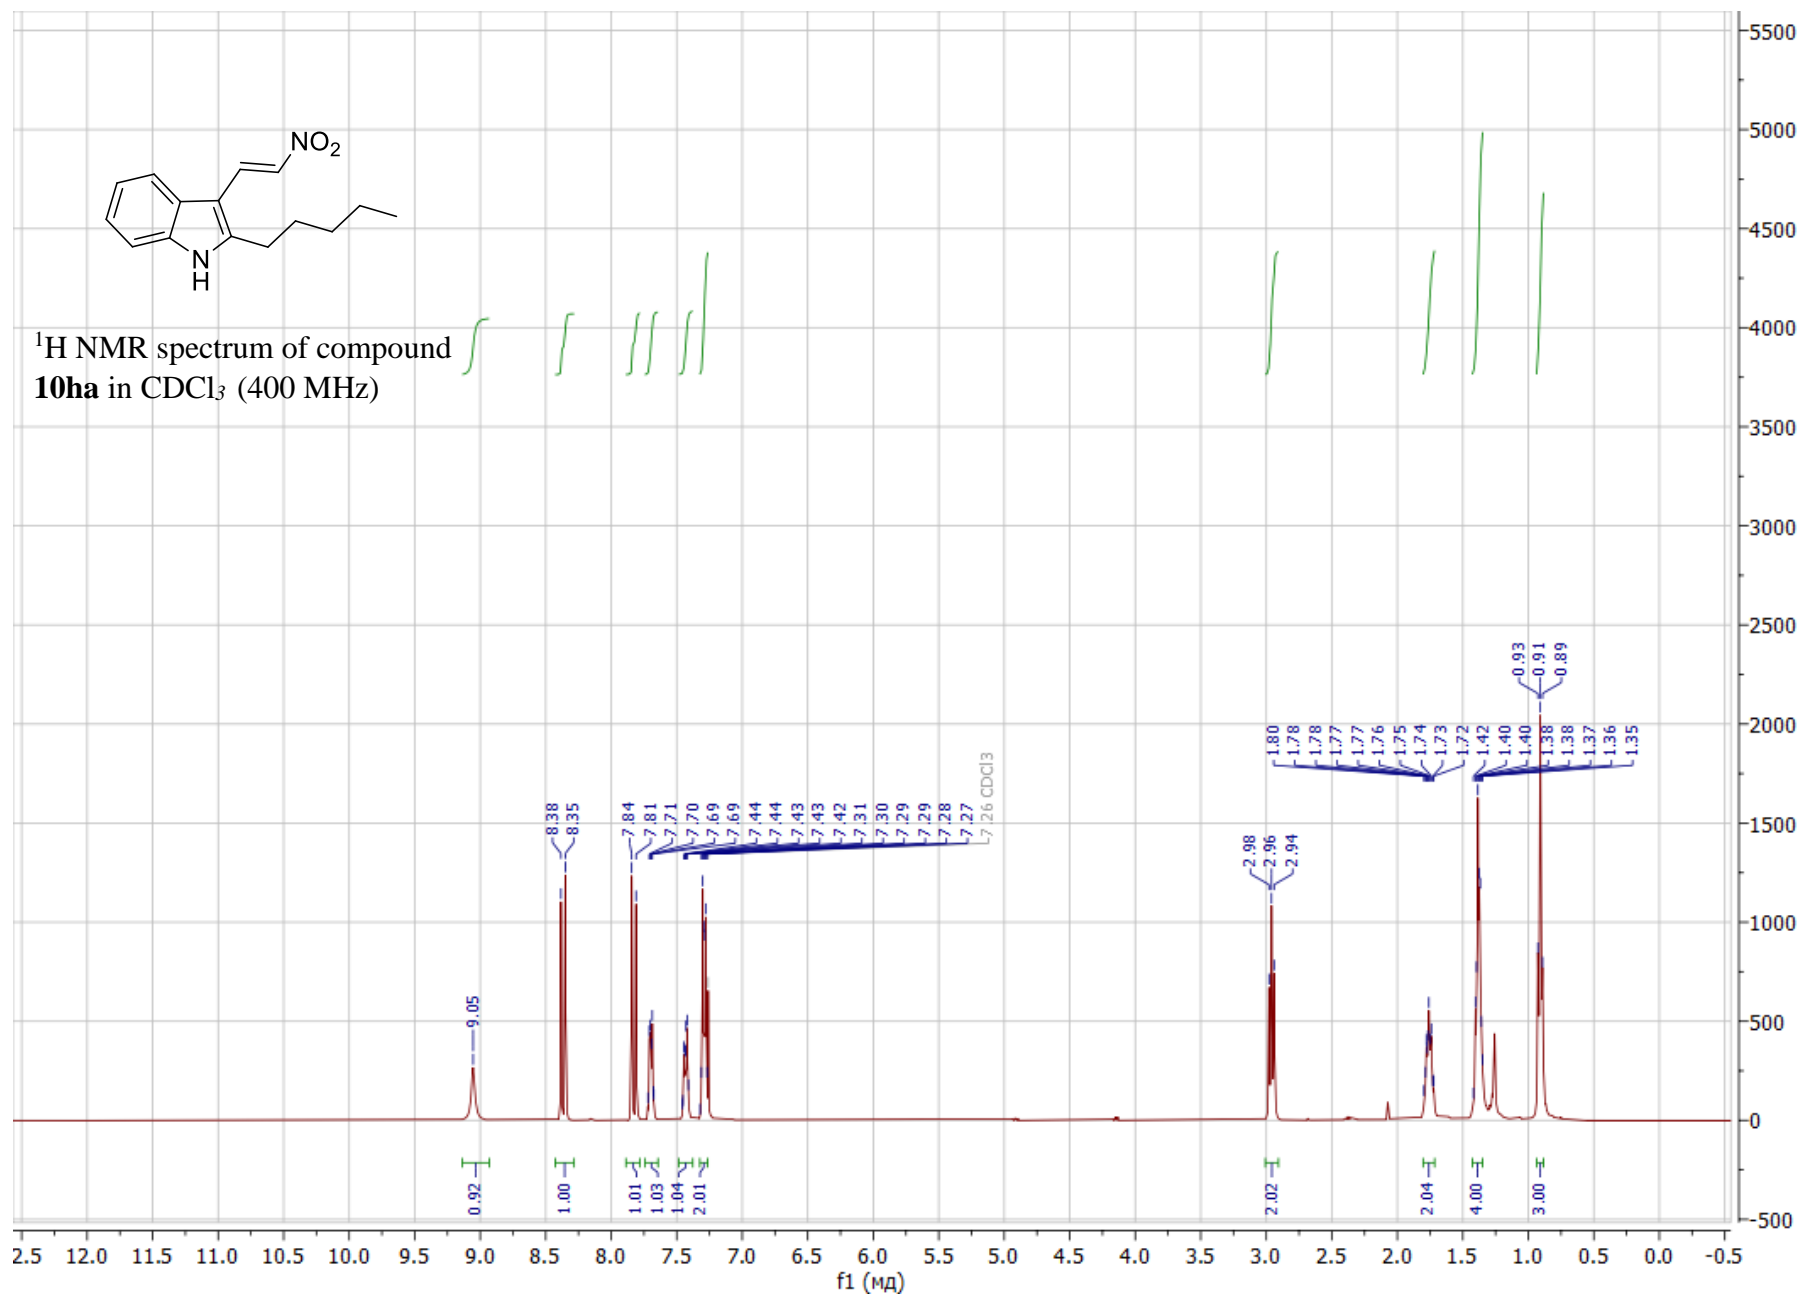

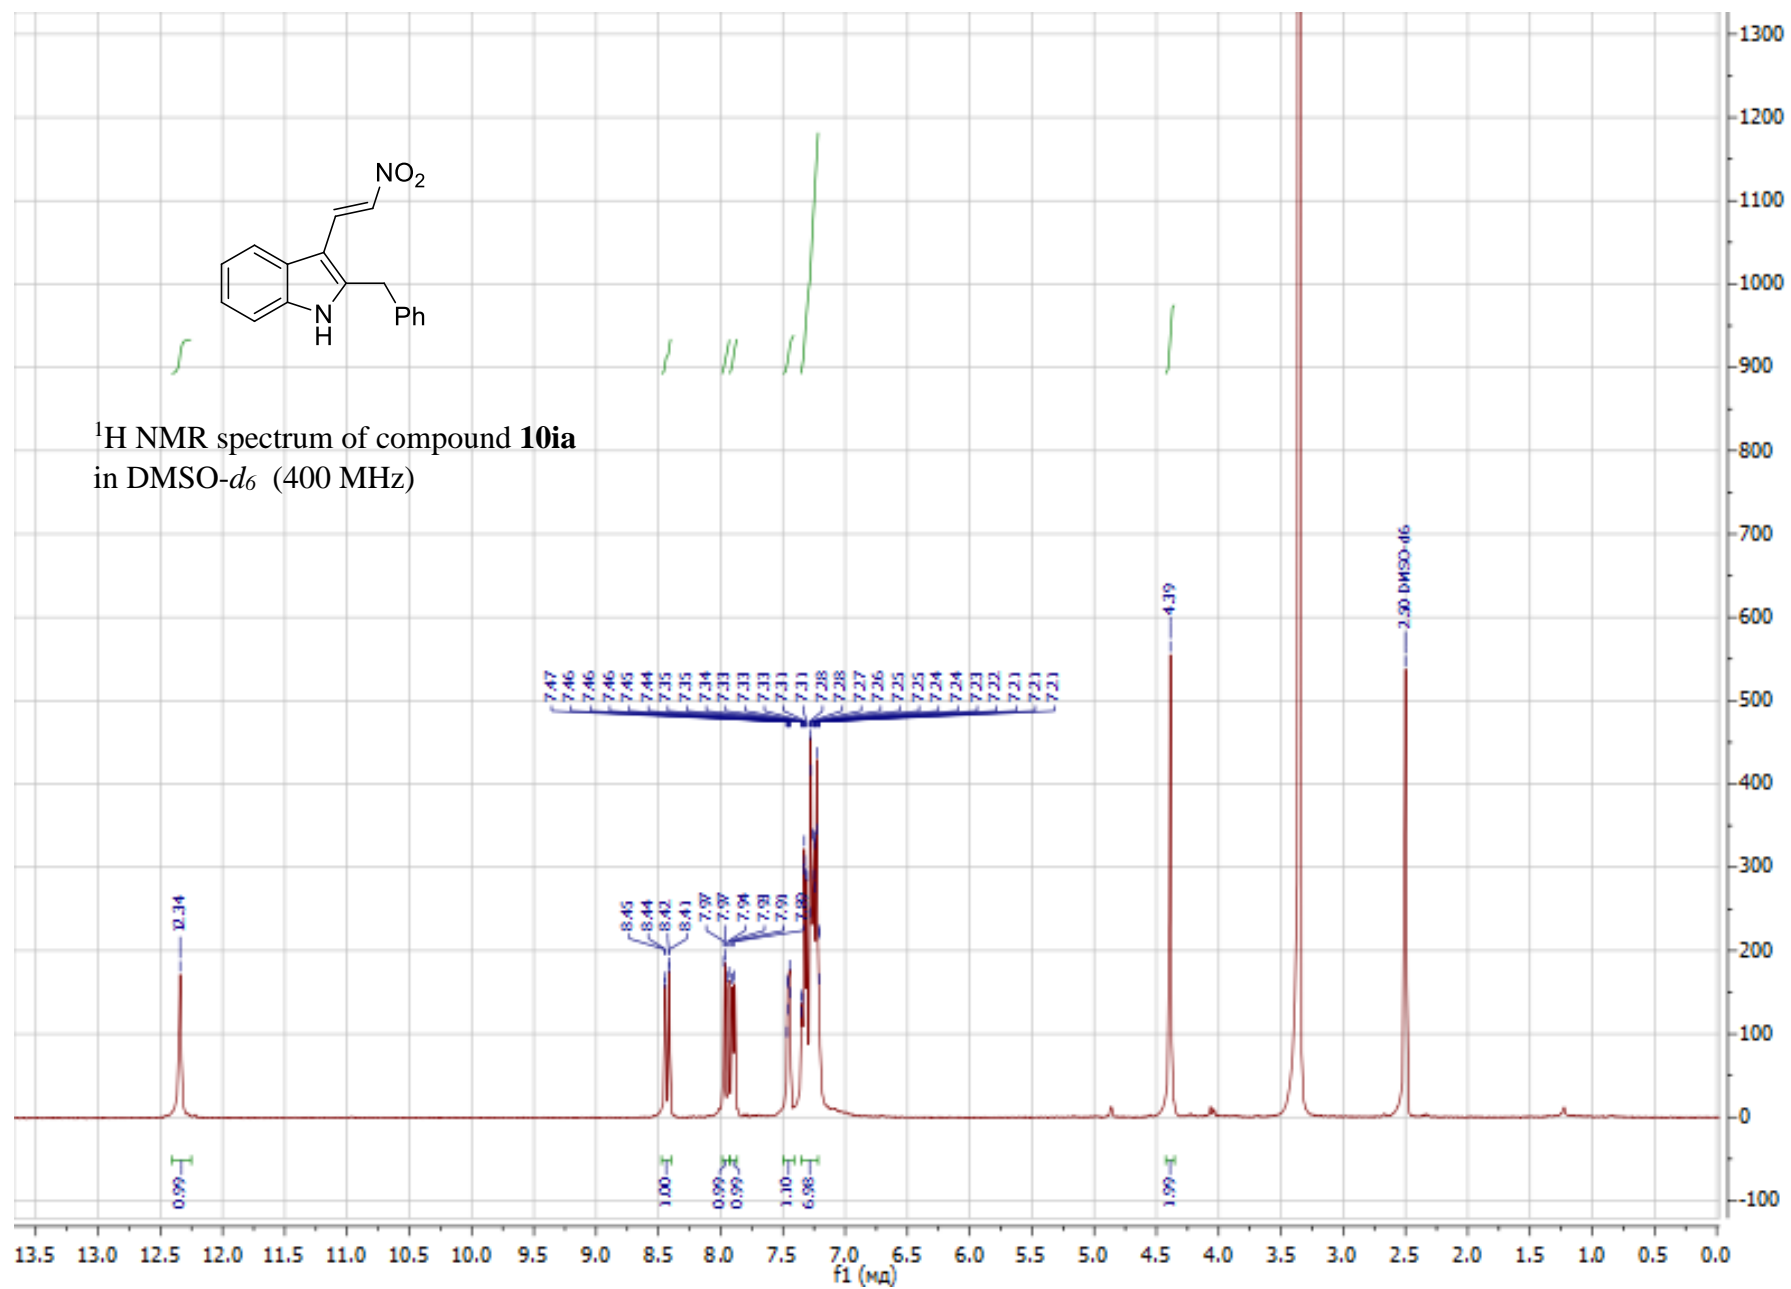

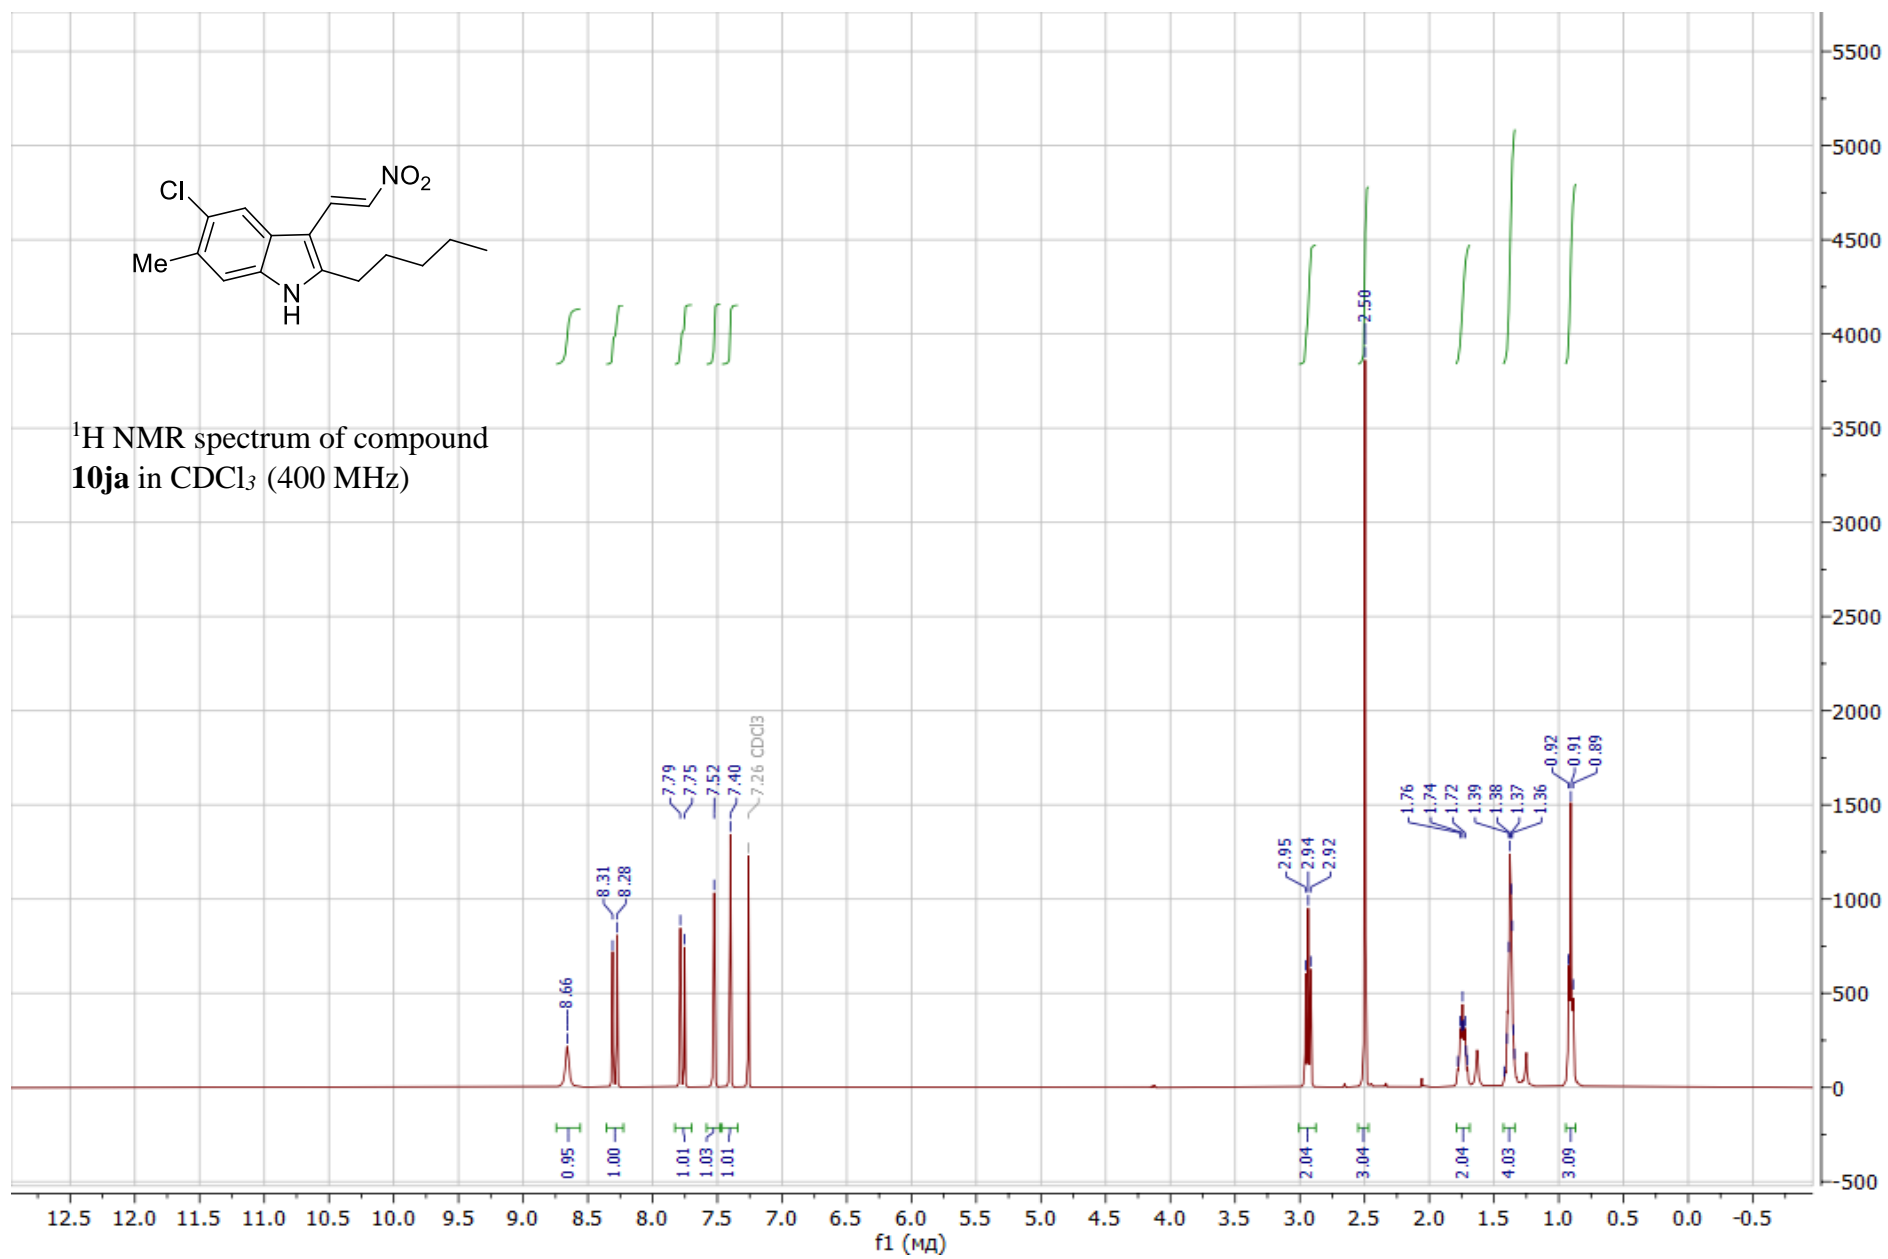

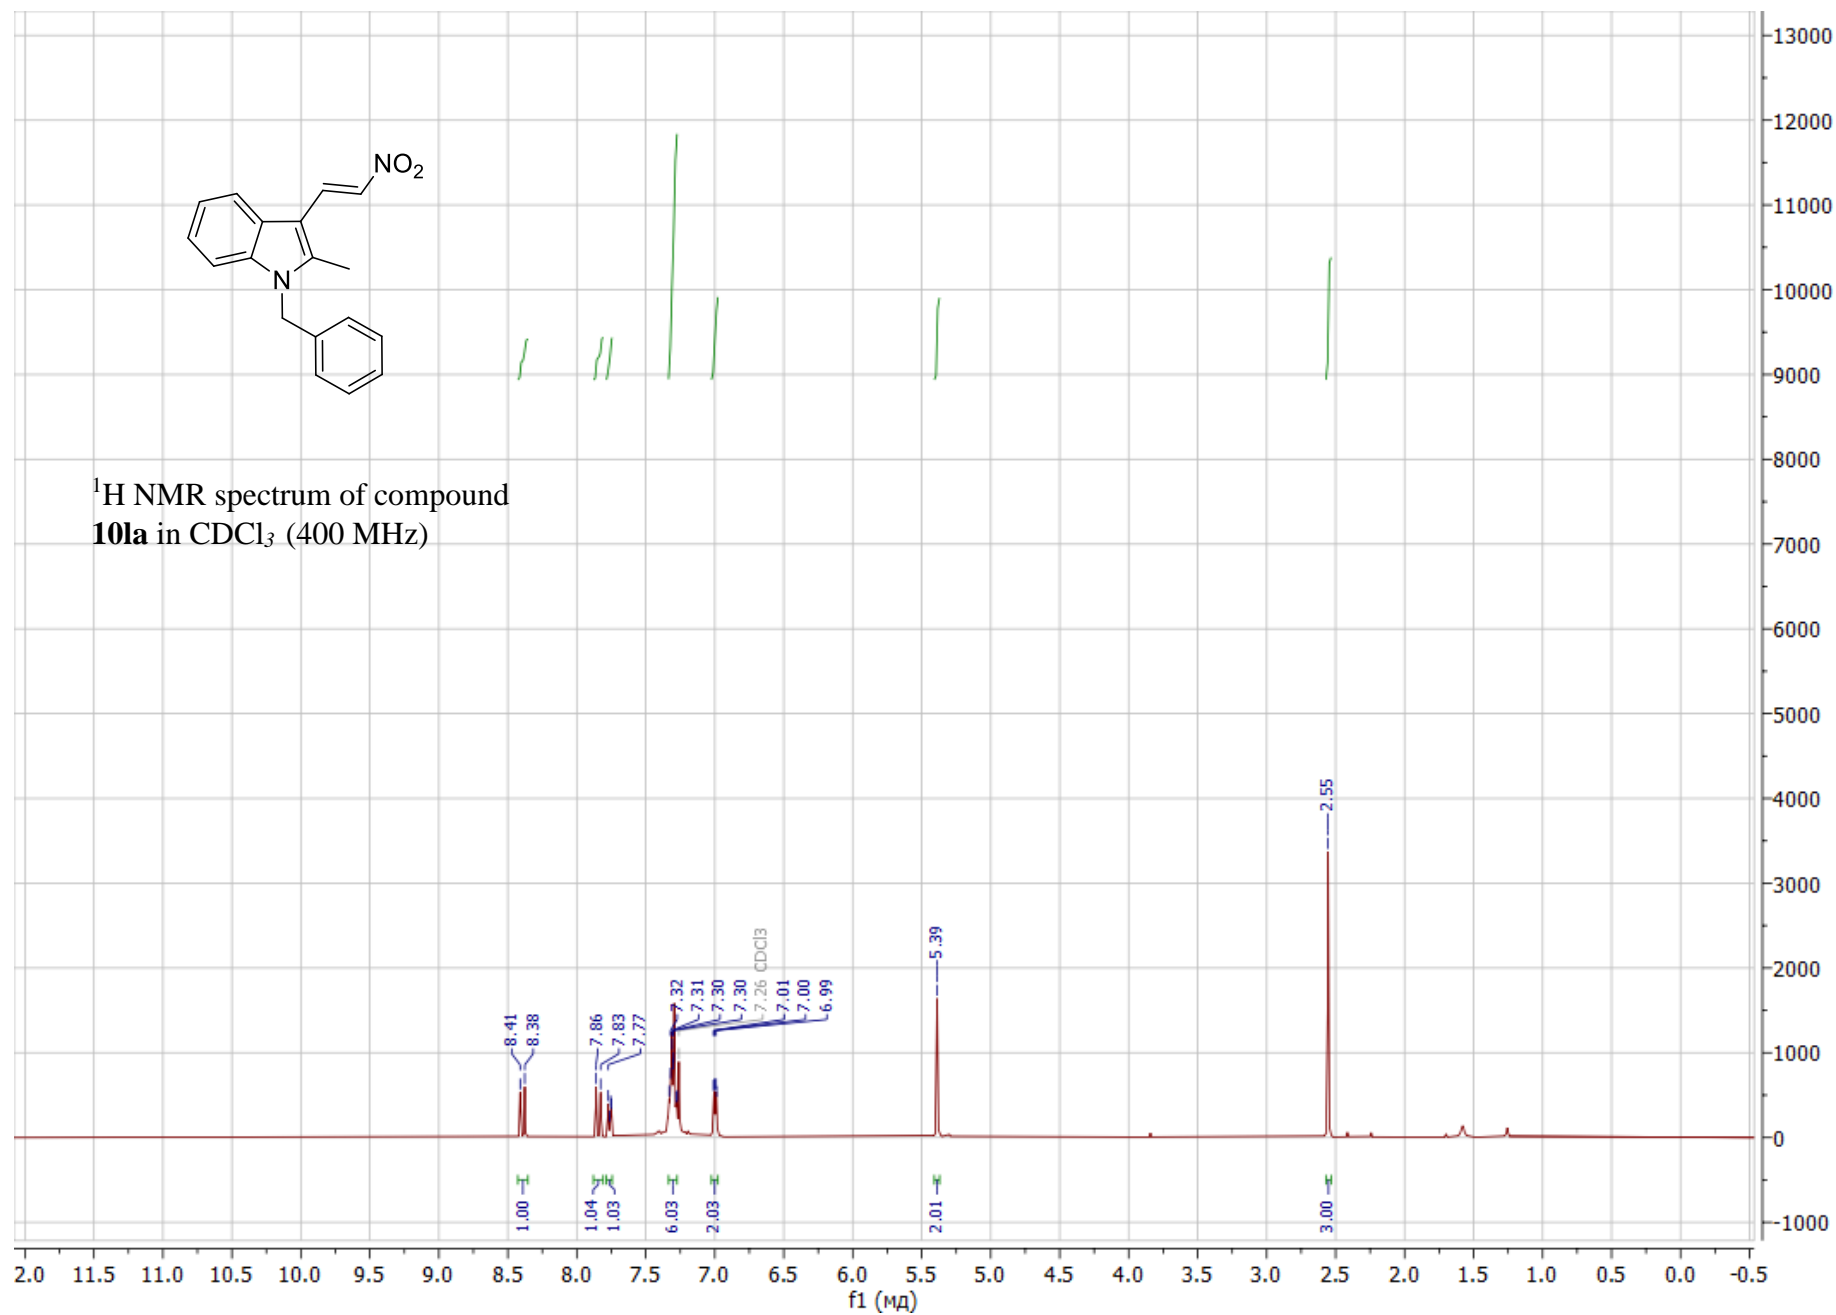



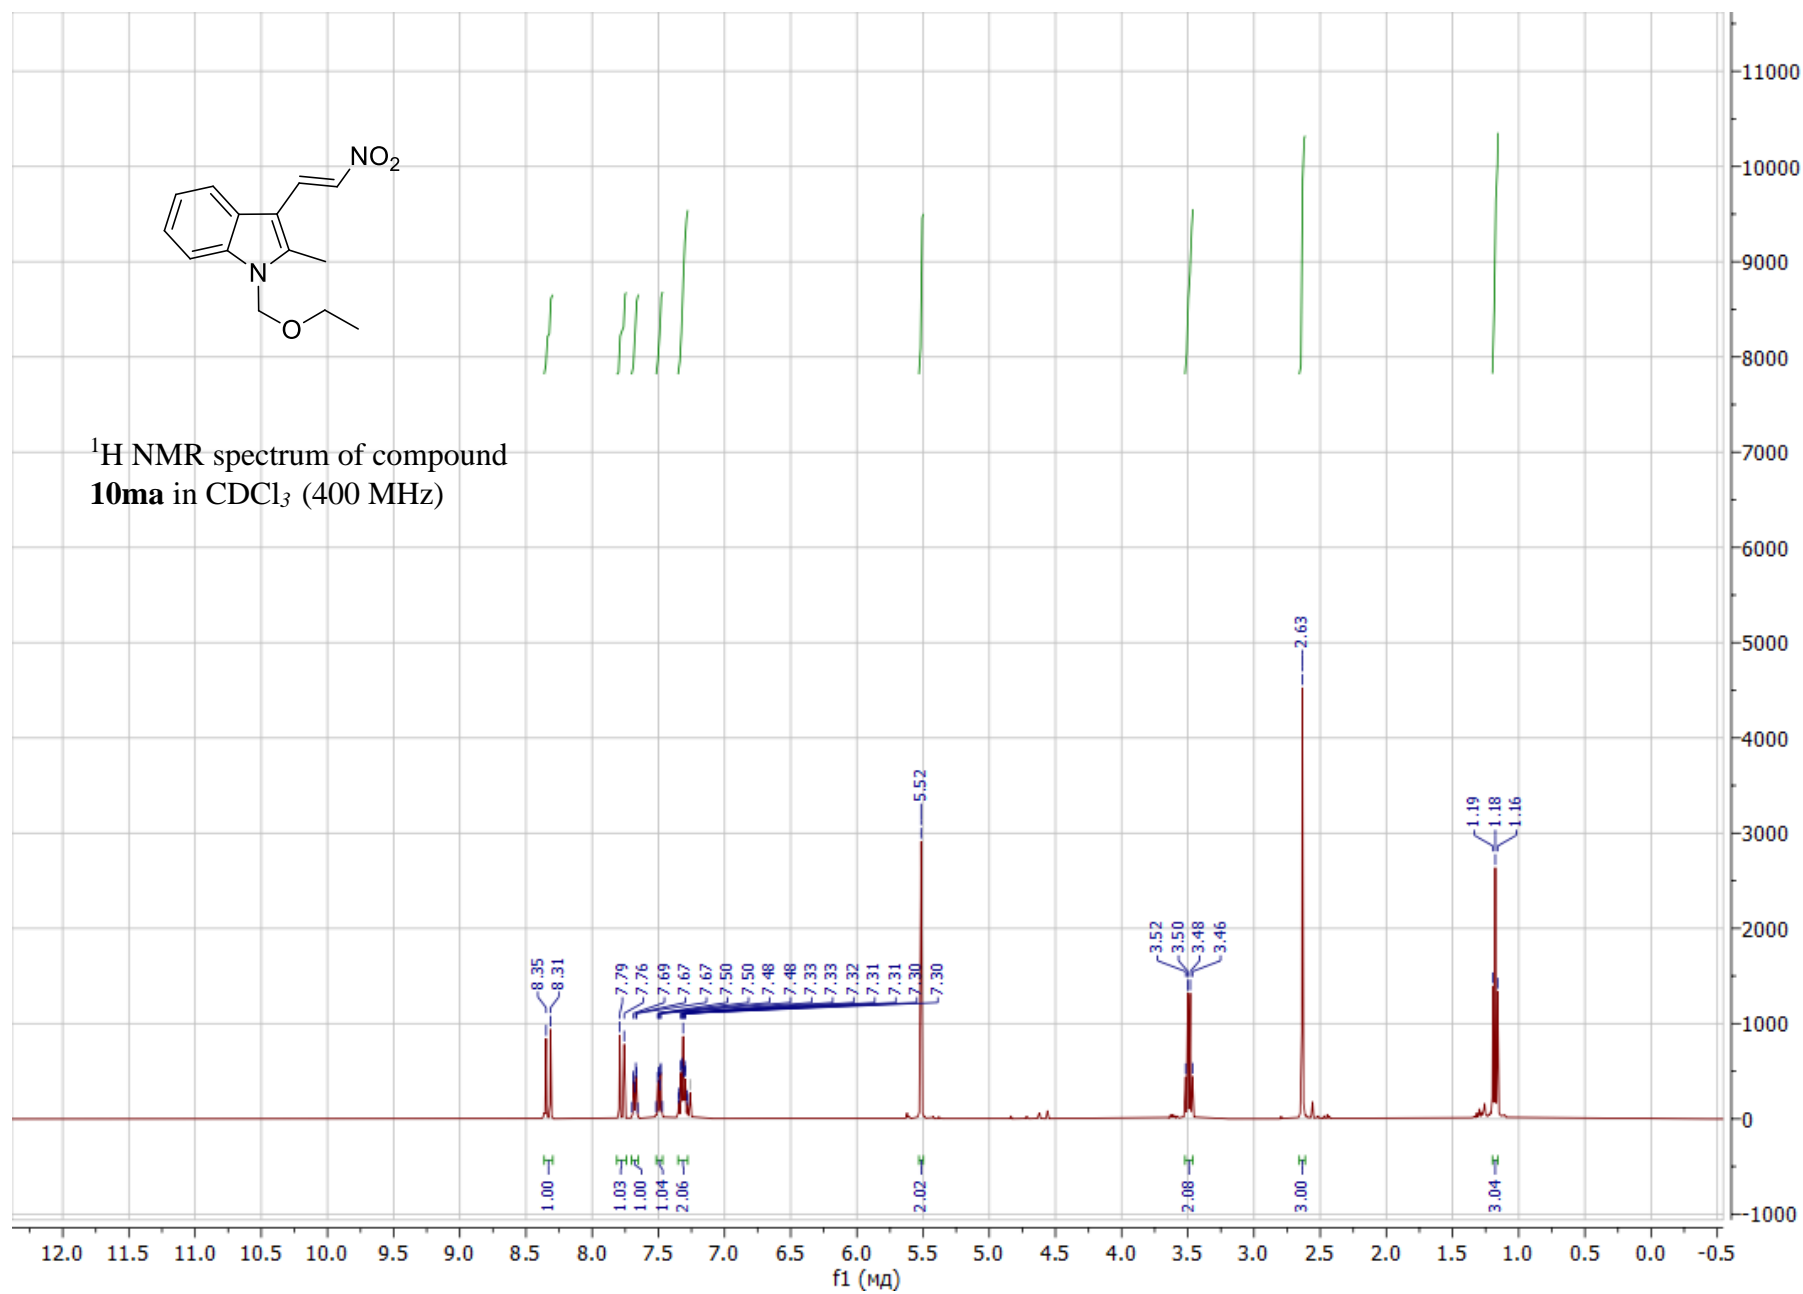

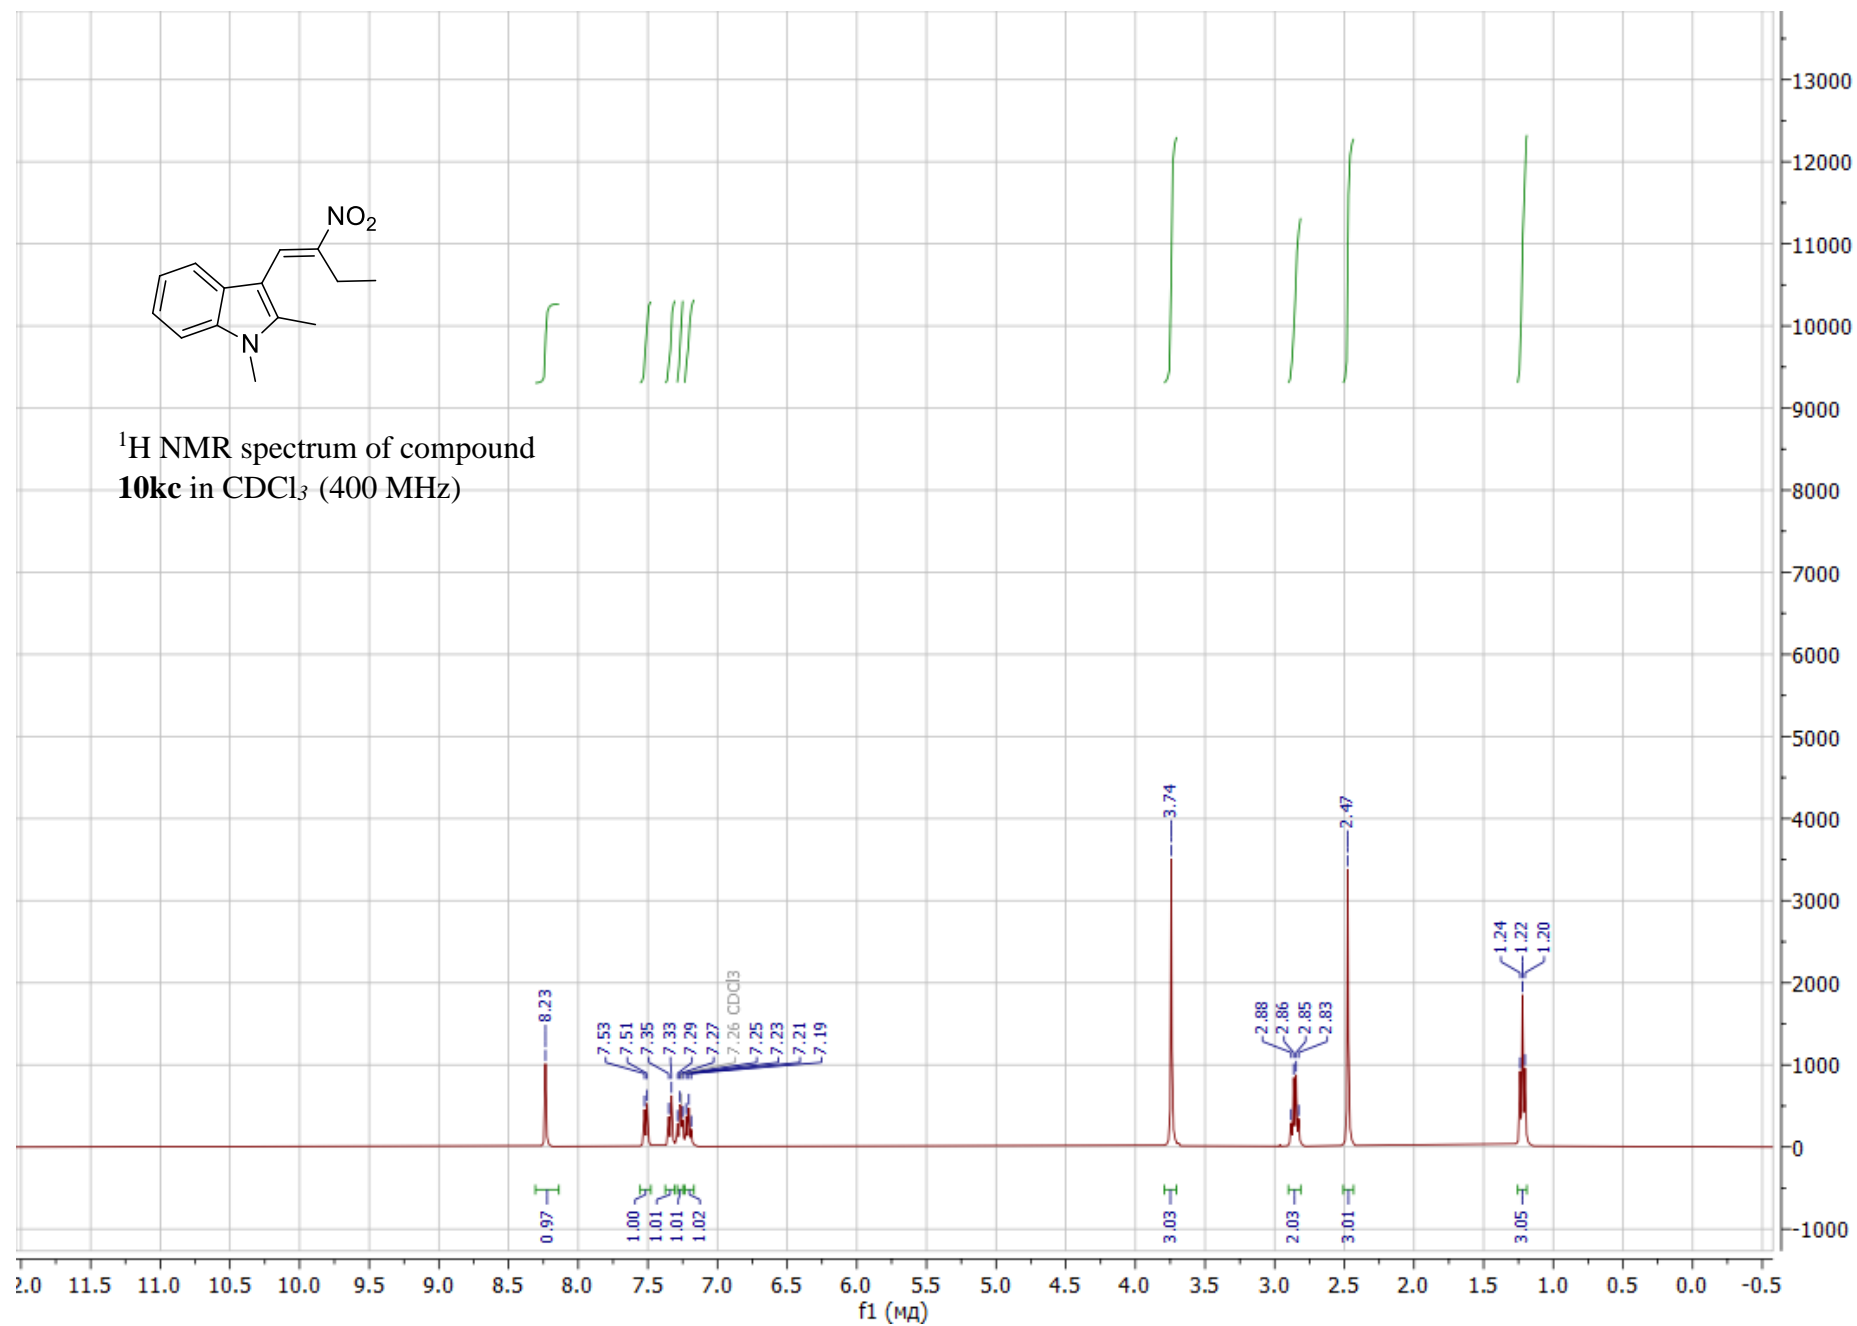

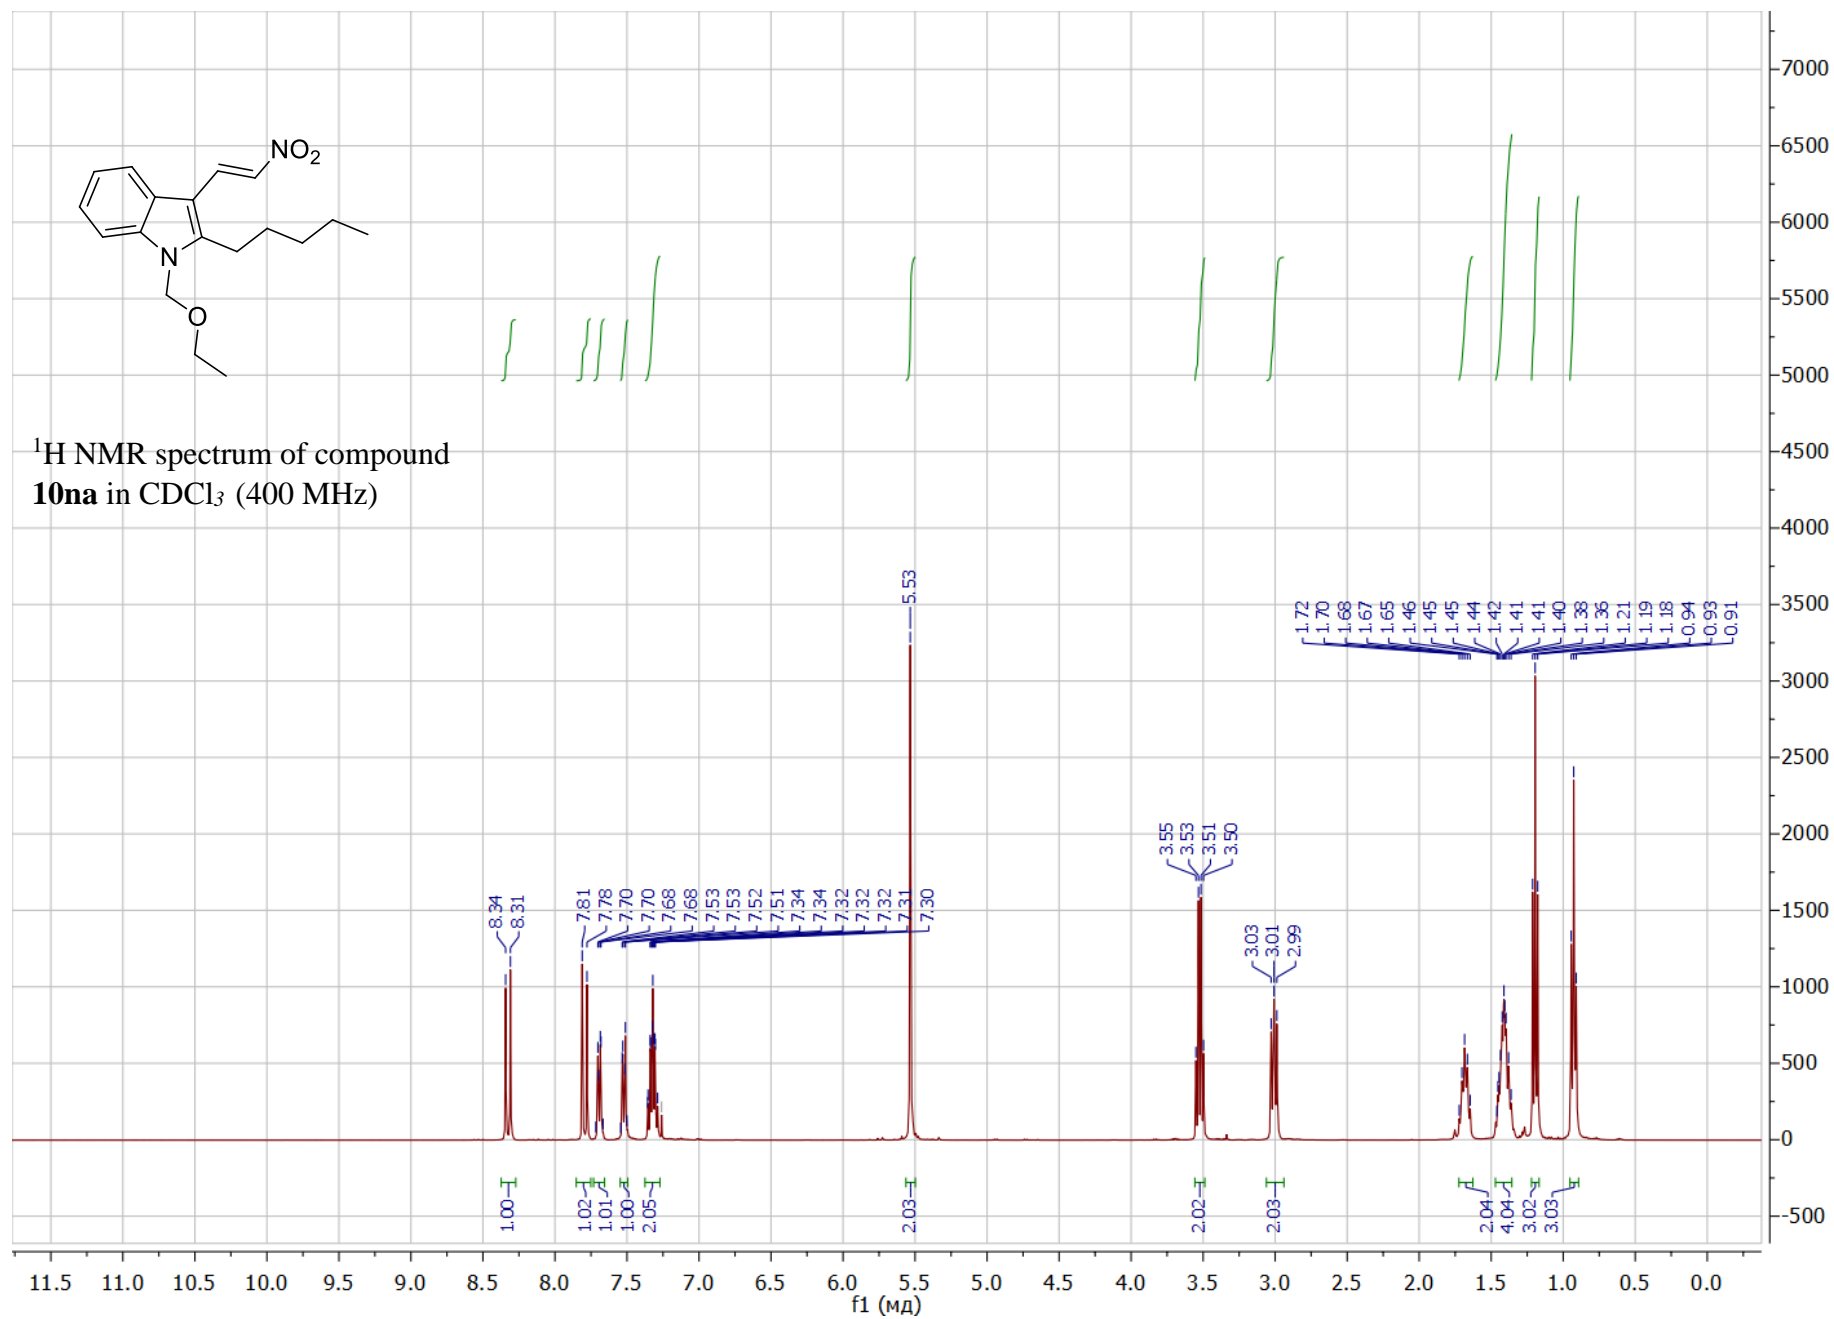

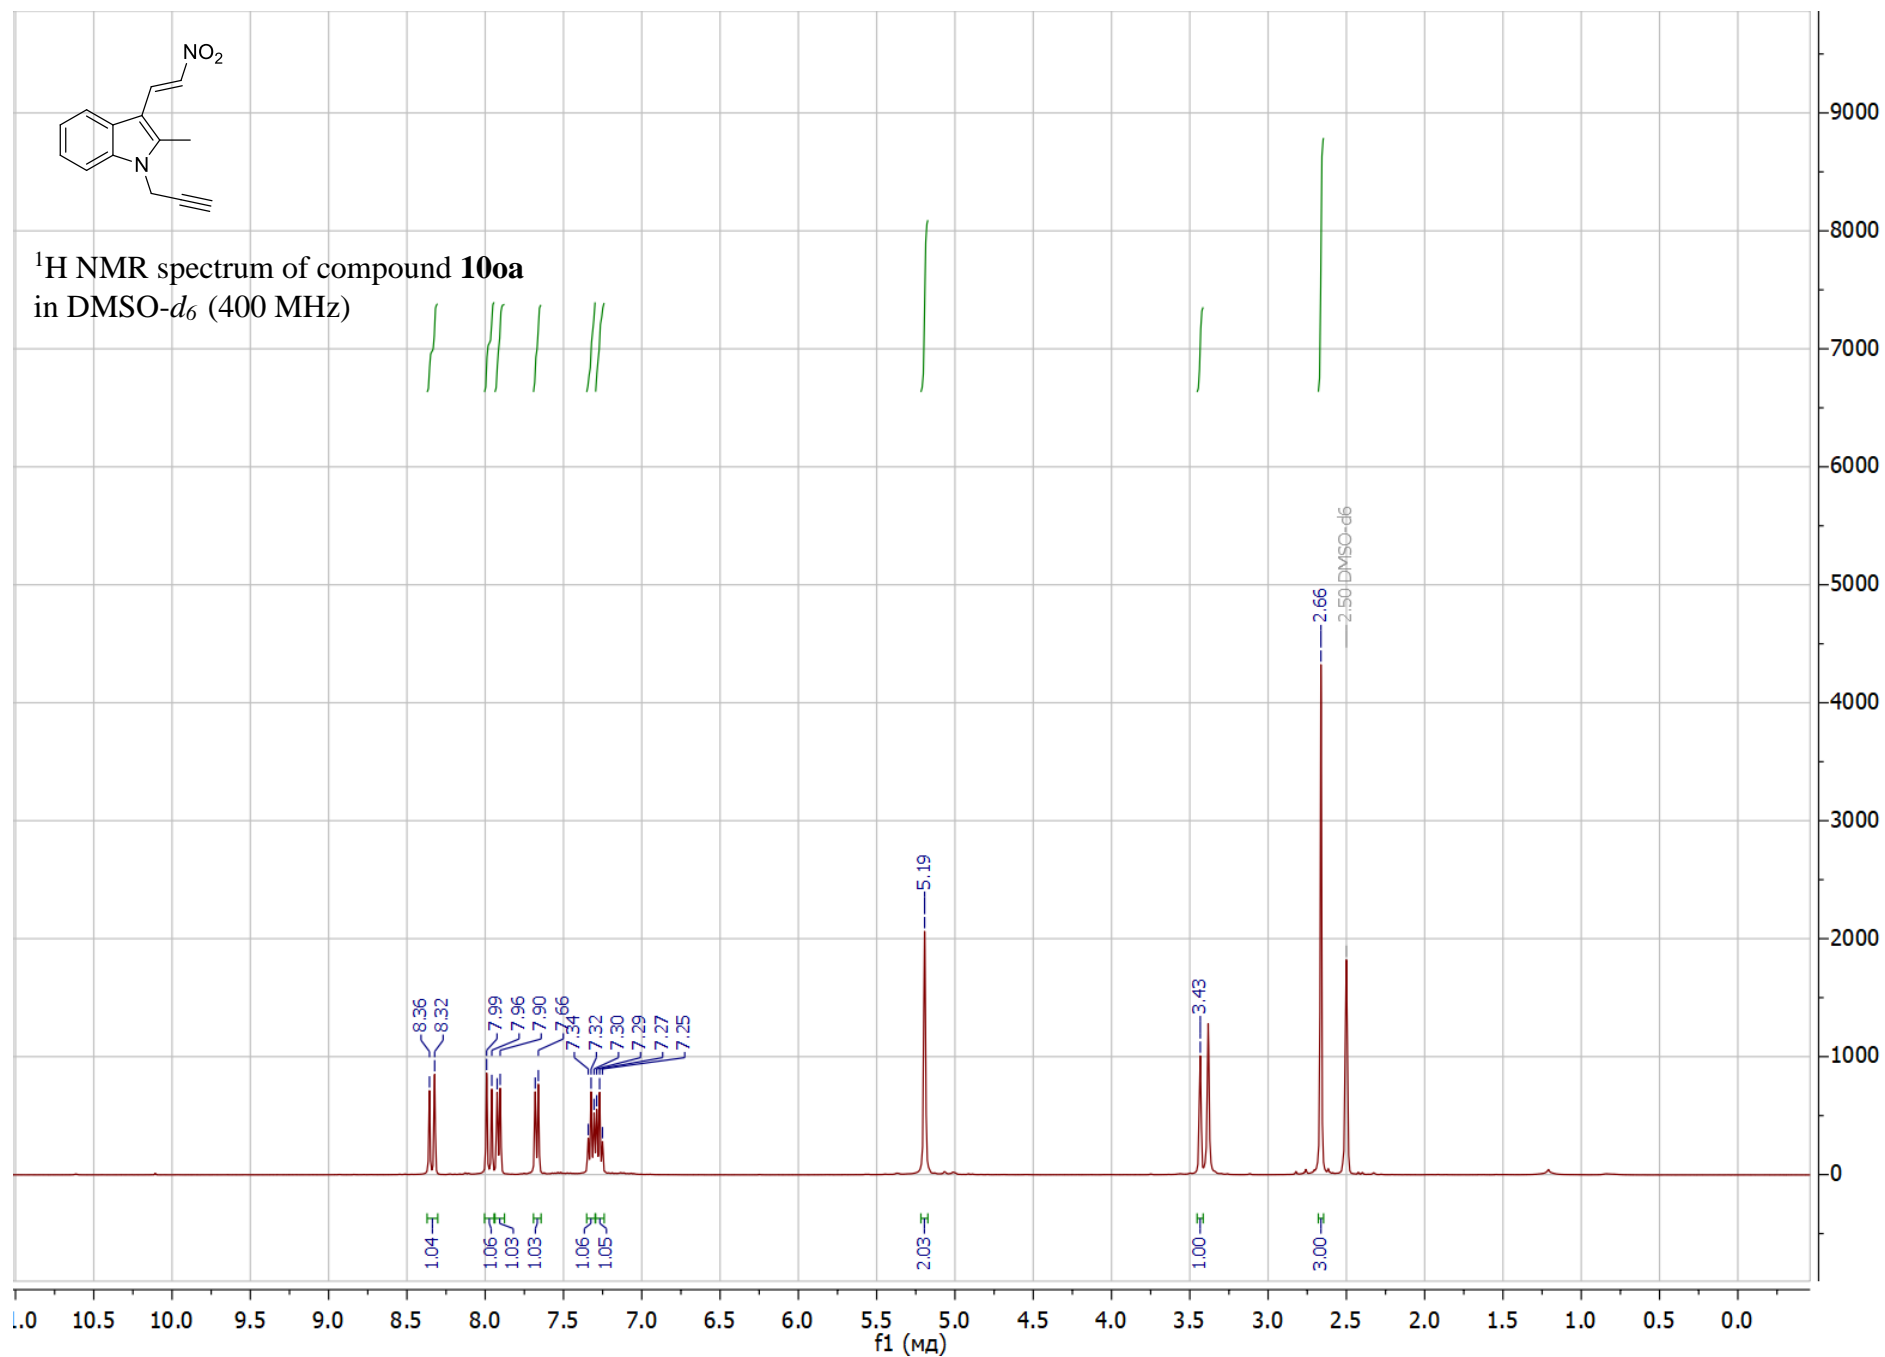

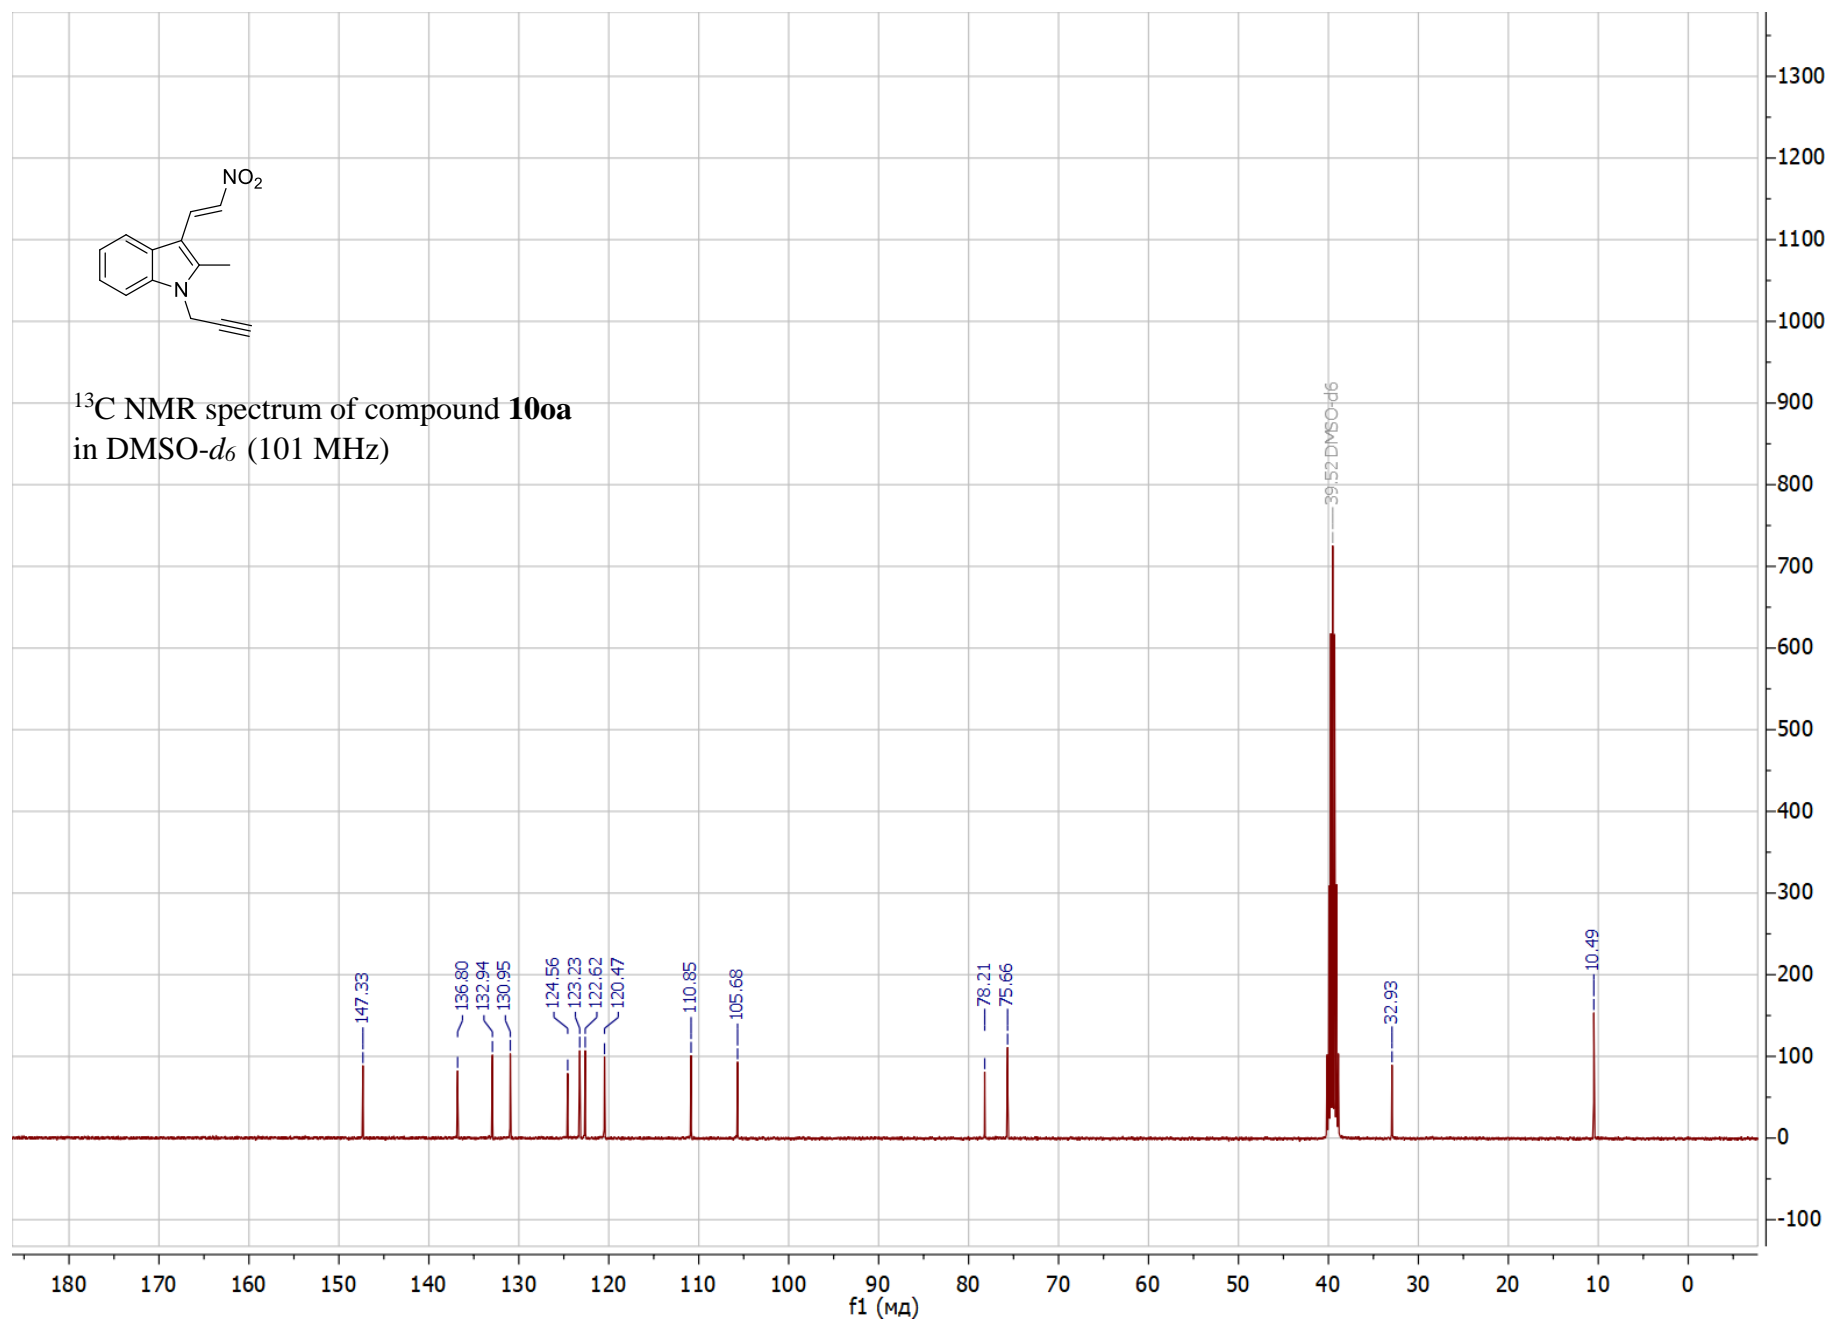

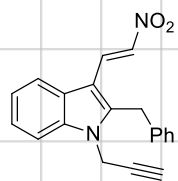

$^1\text{H}$  NMR spectrum of compound **10pa**  
in  $\text{CDCl}_3$  (400 MHz)

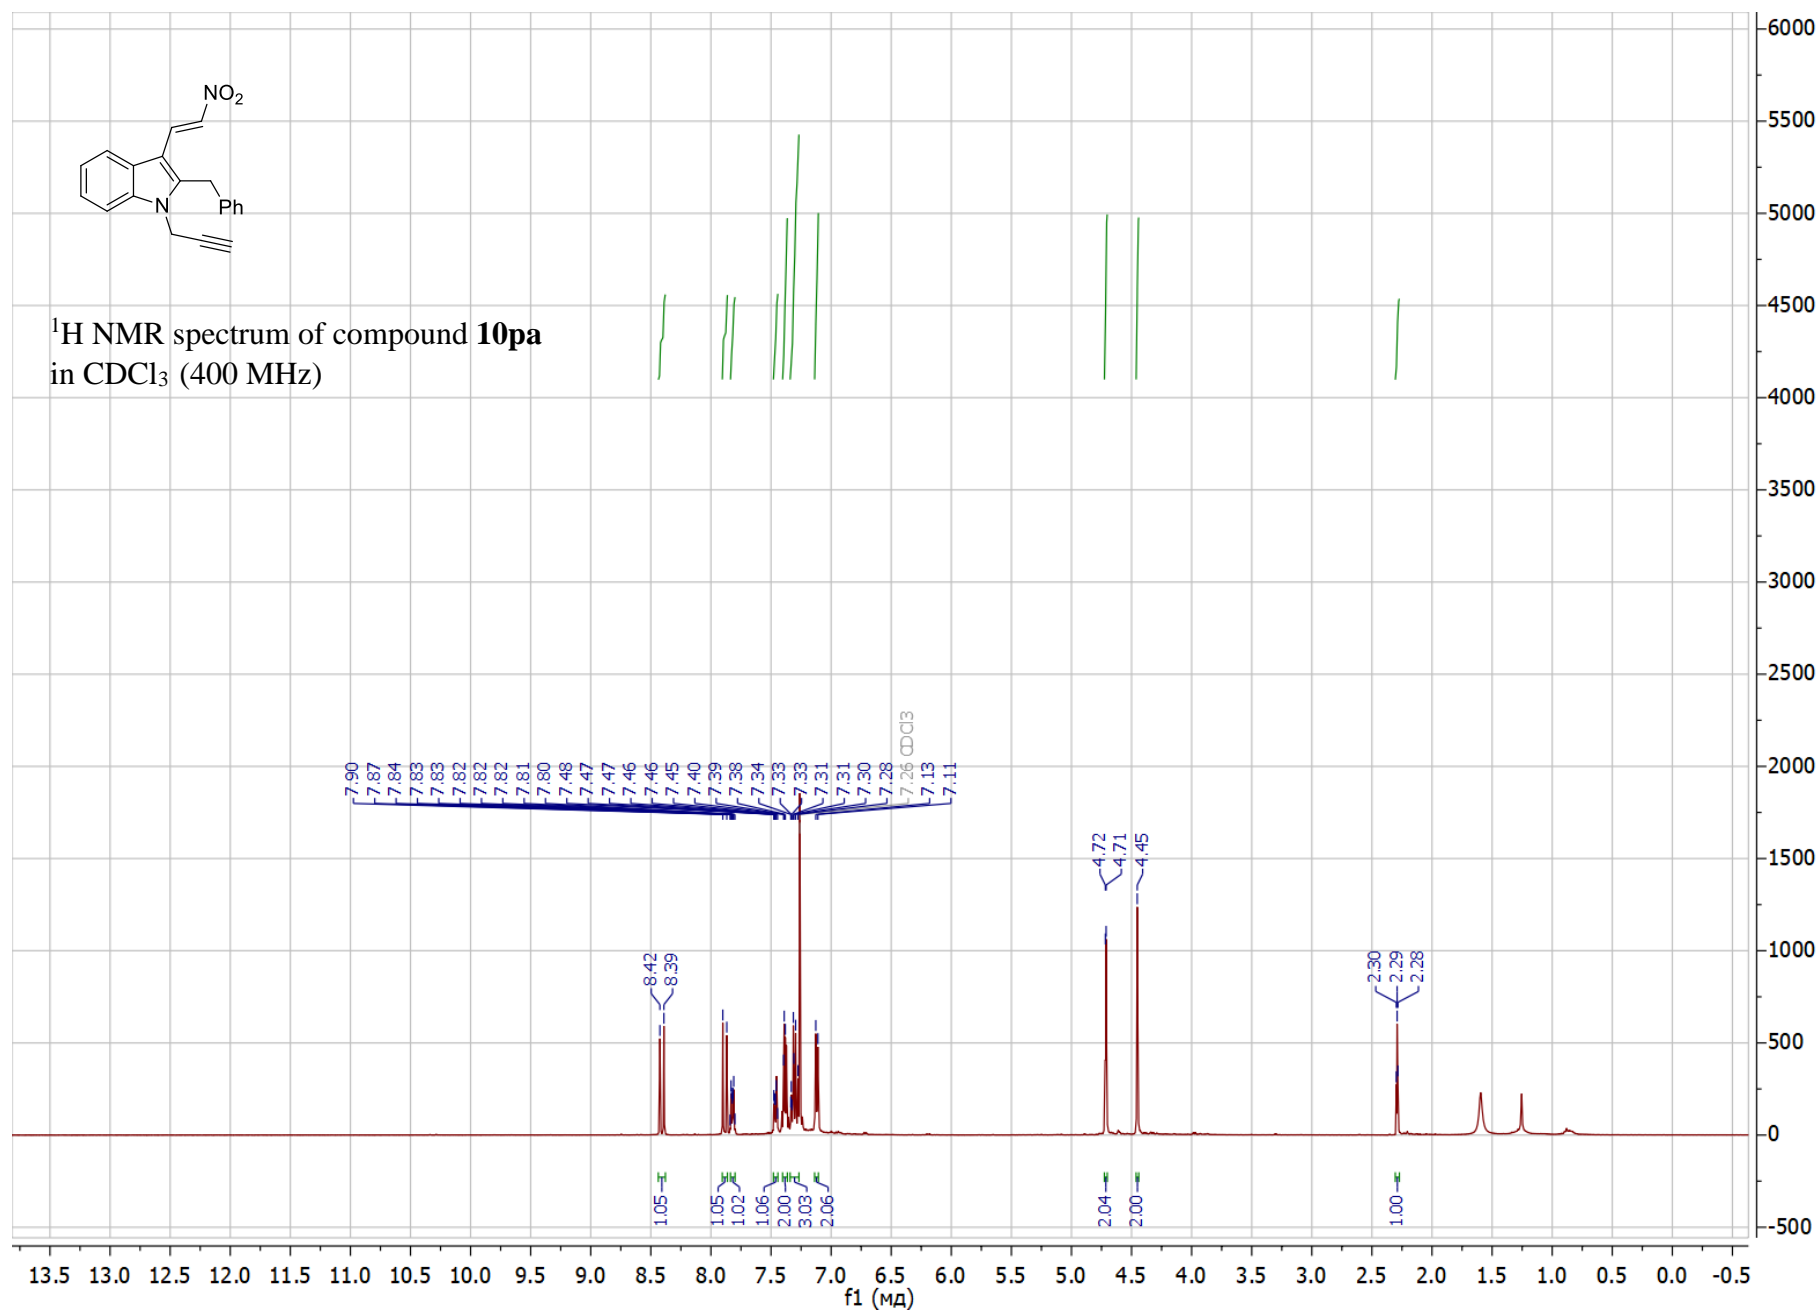

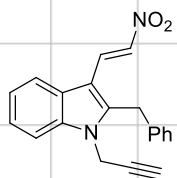

$^{13}\text{C}$  NMR spectrum of compound **10pa**  
in  $\text{CDCl}_3$  (101 MHz)

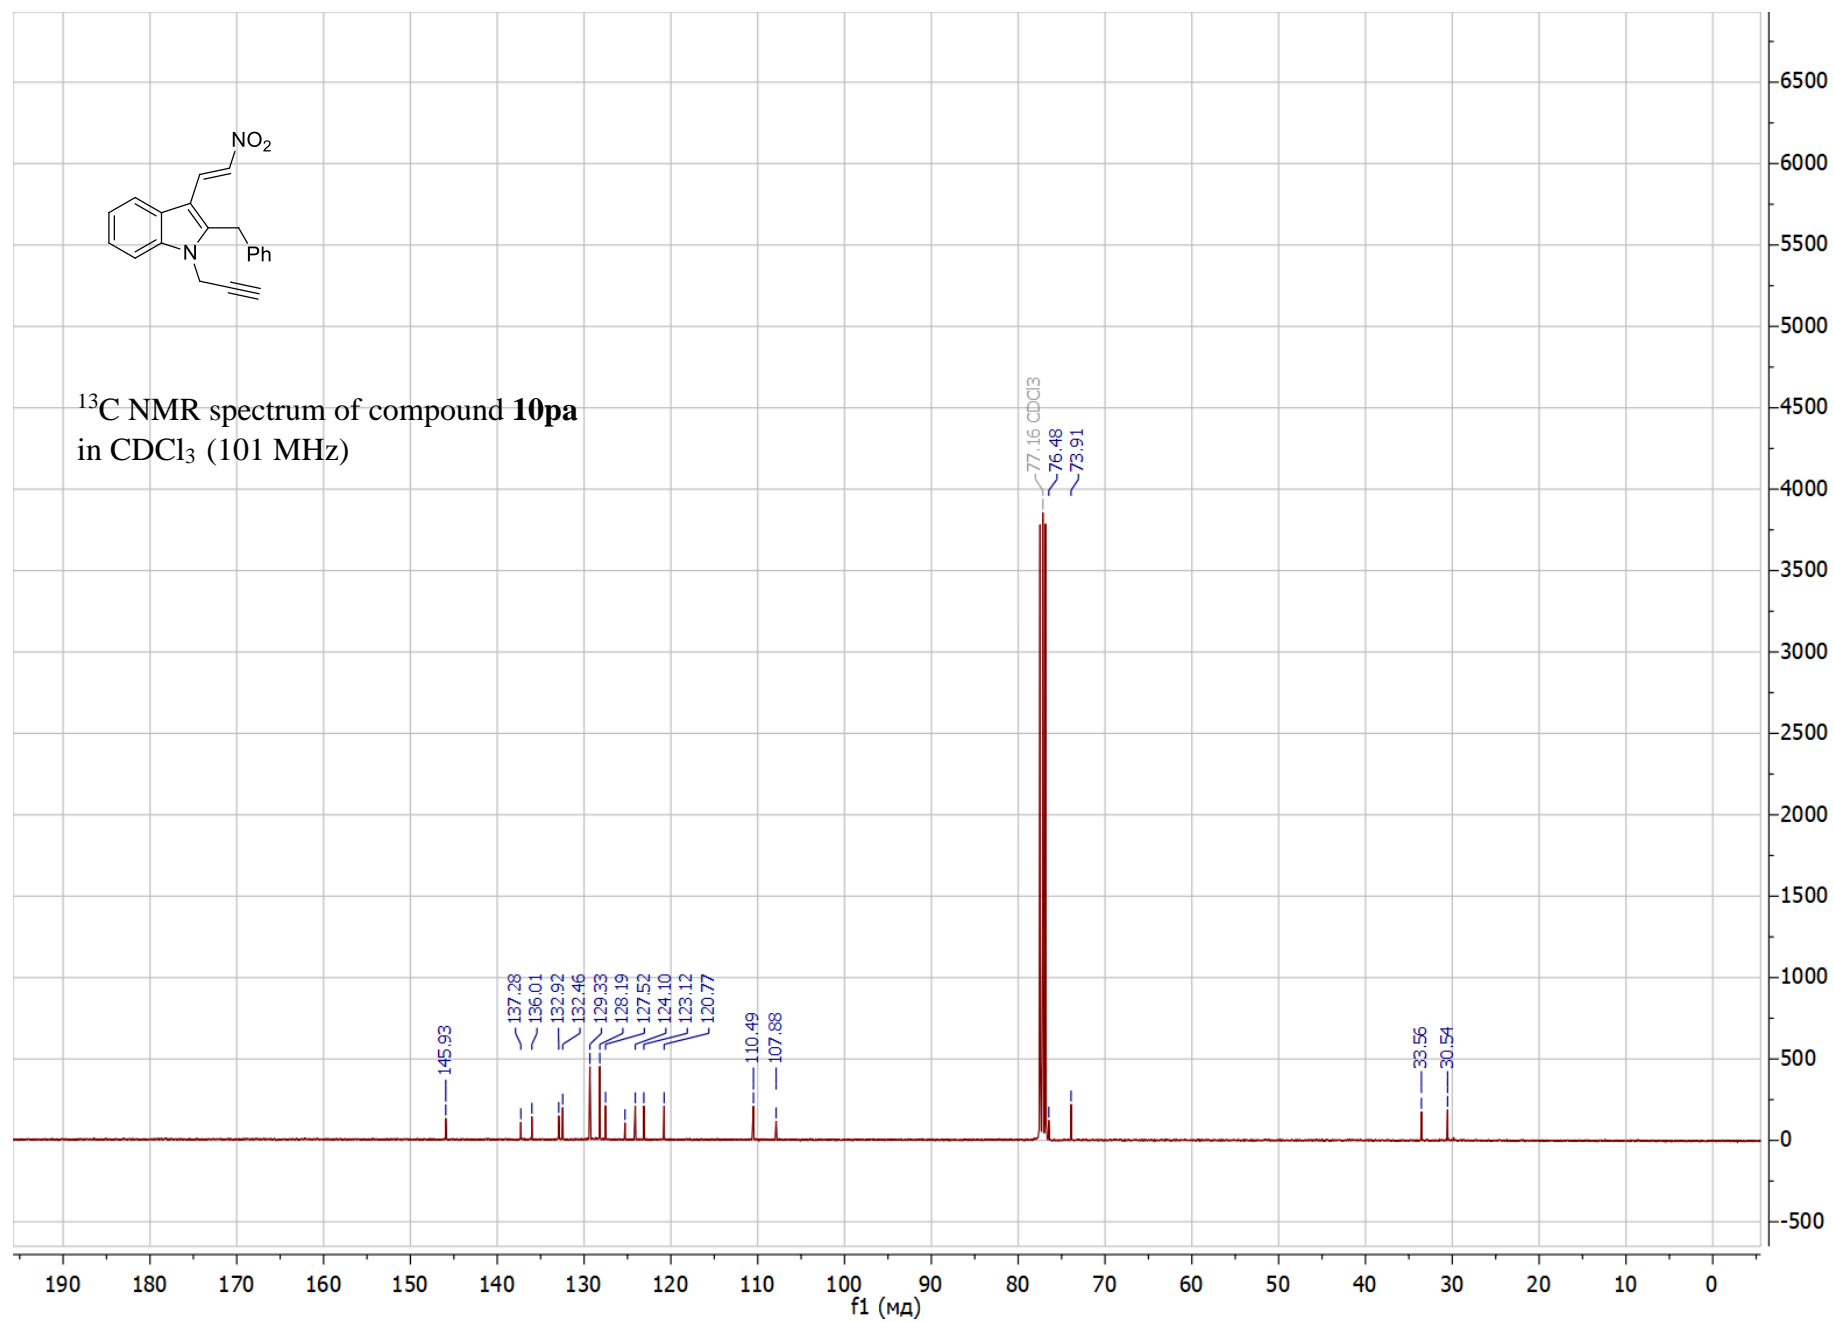

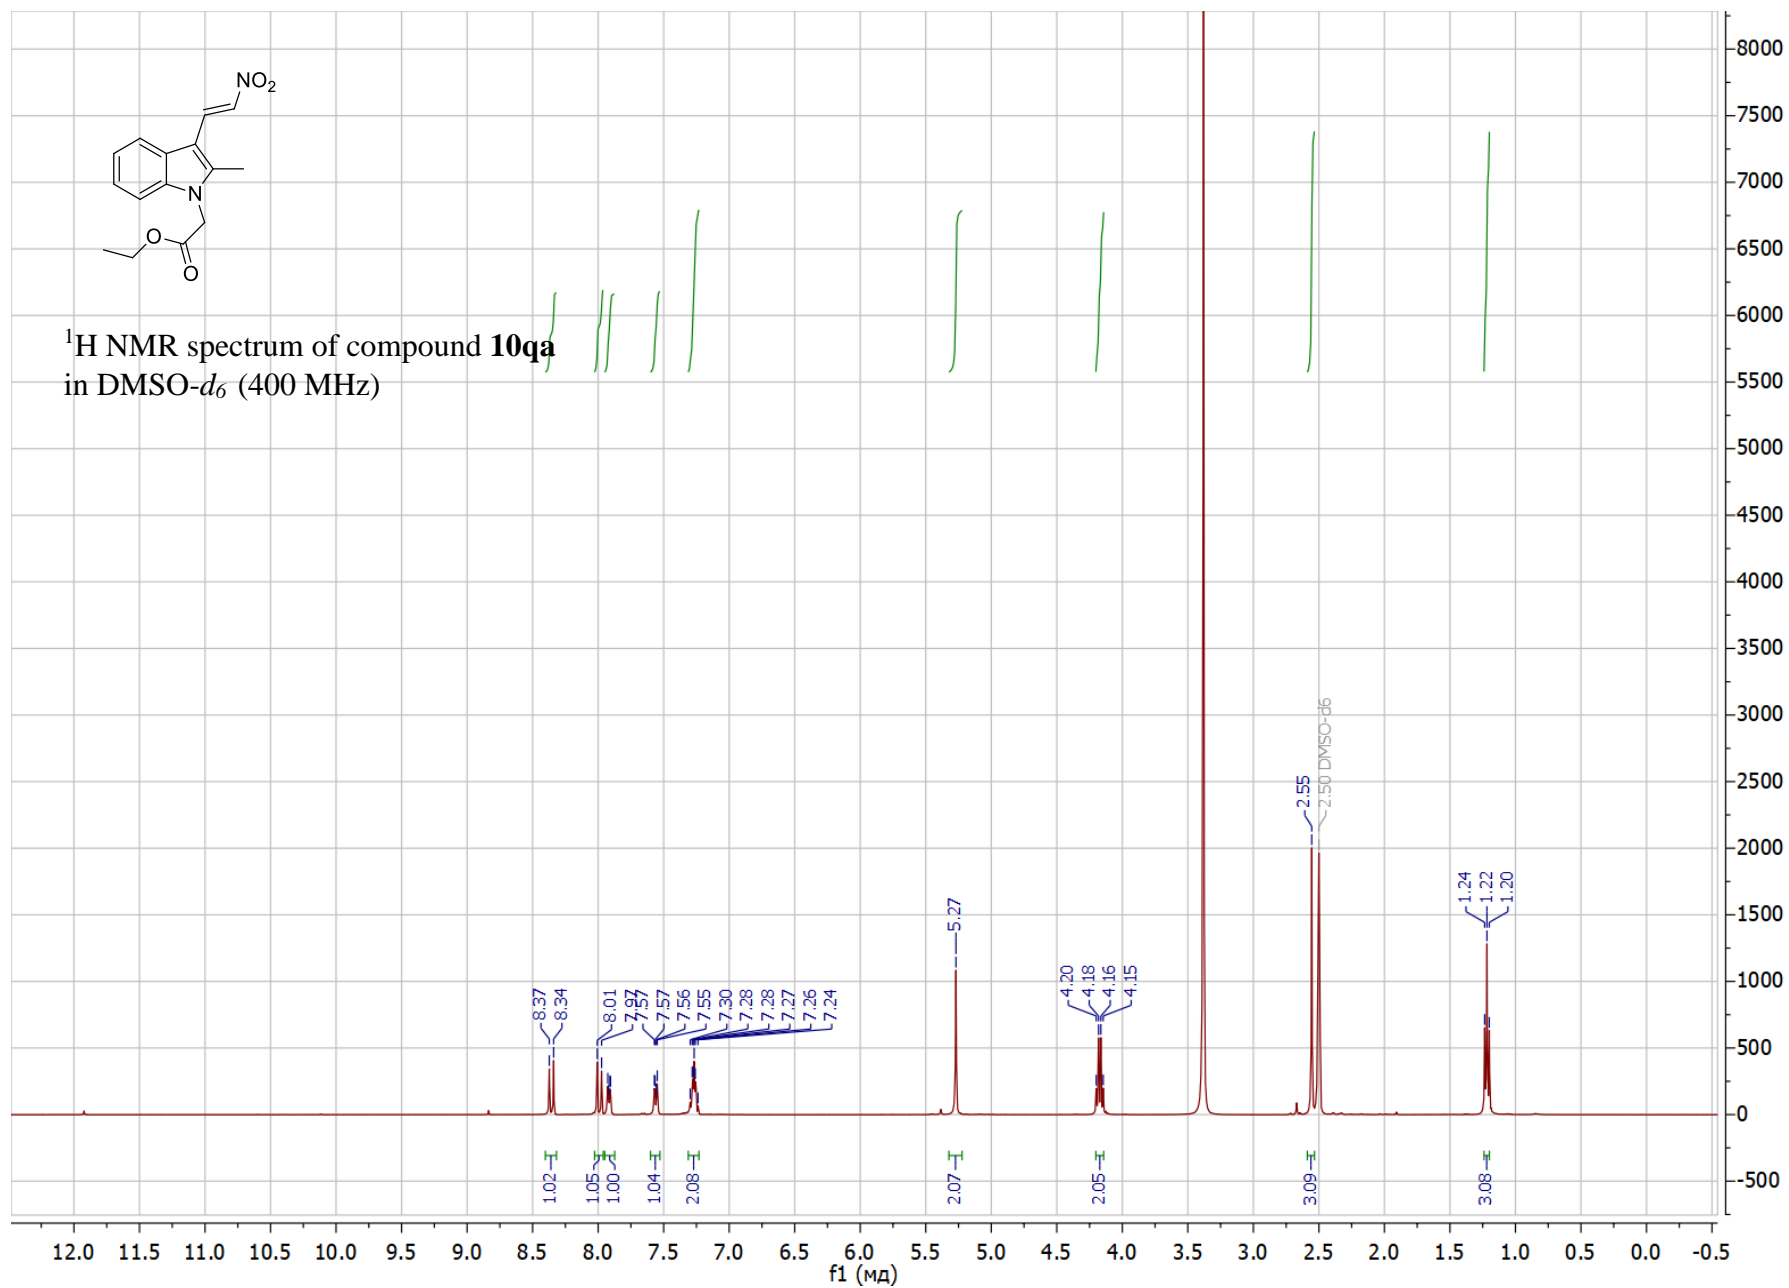



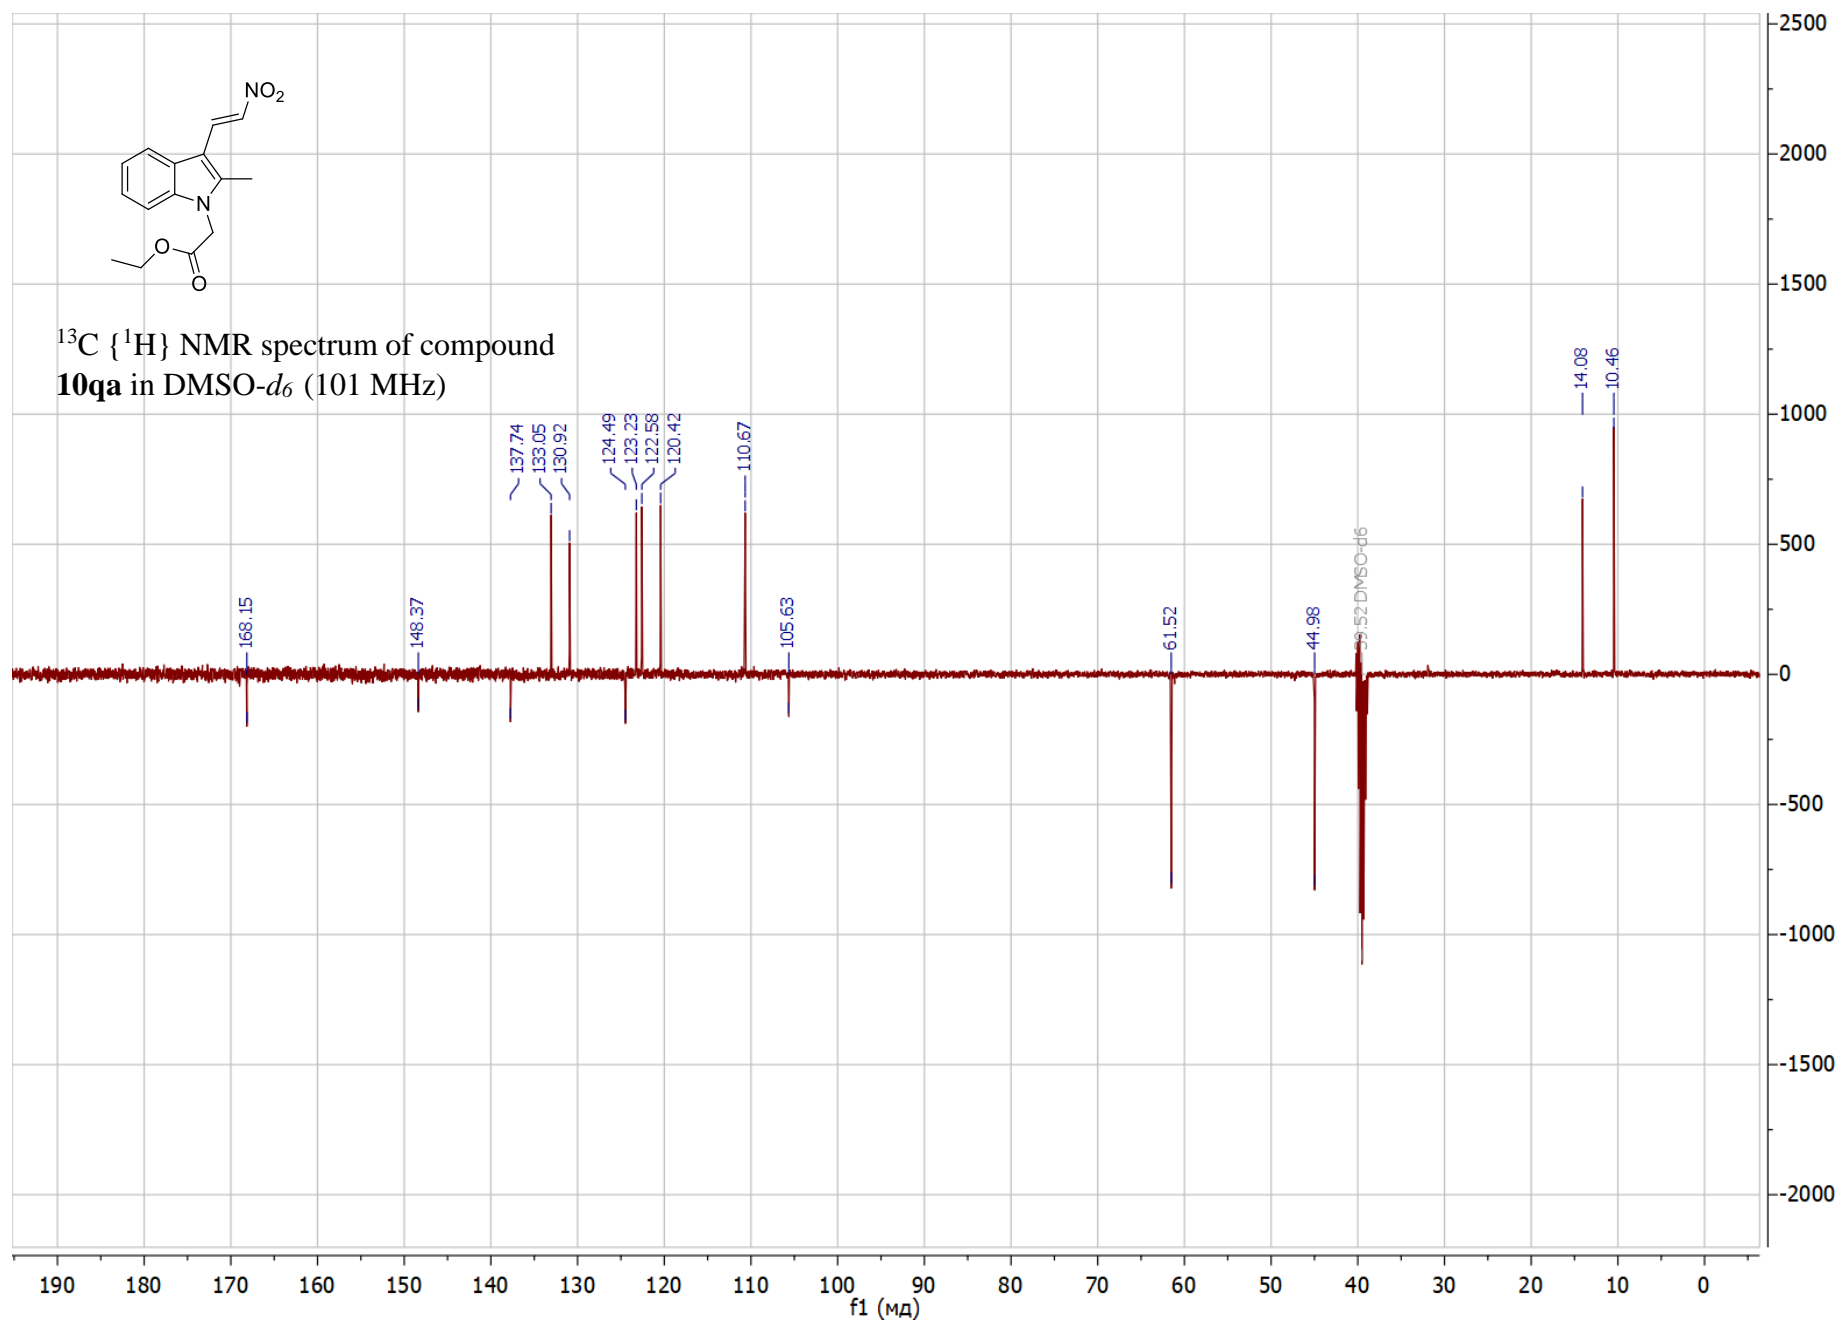

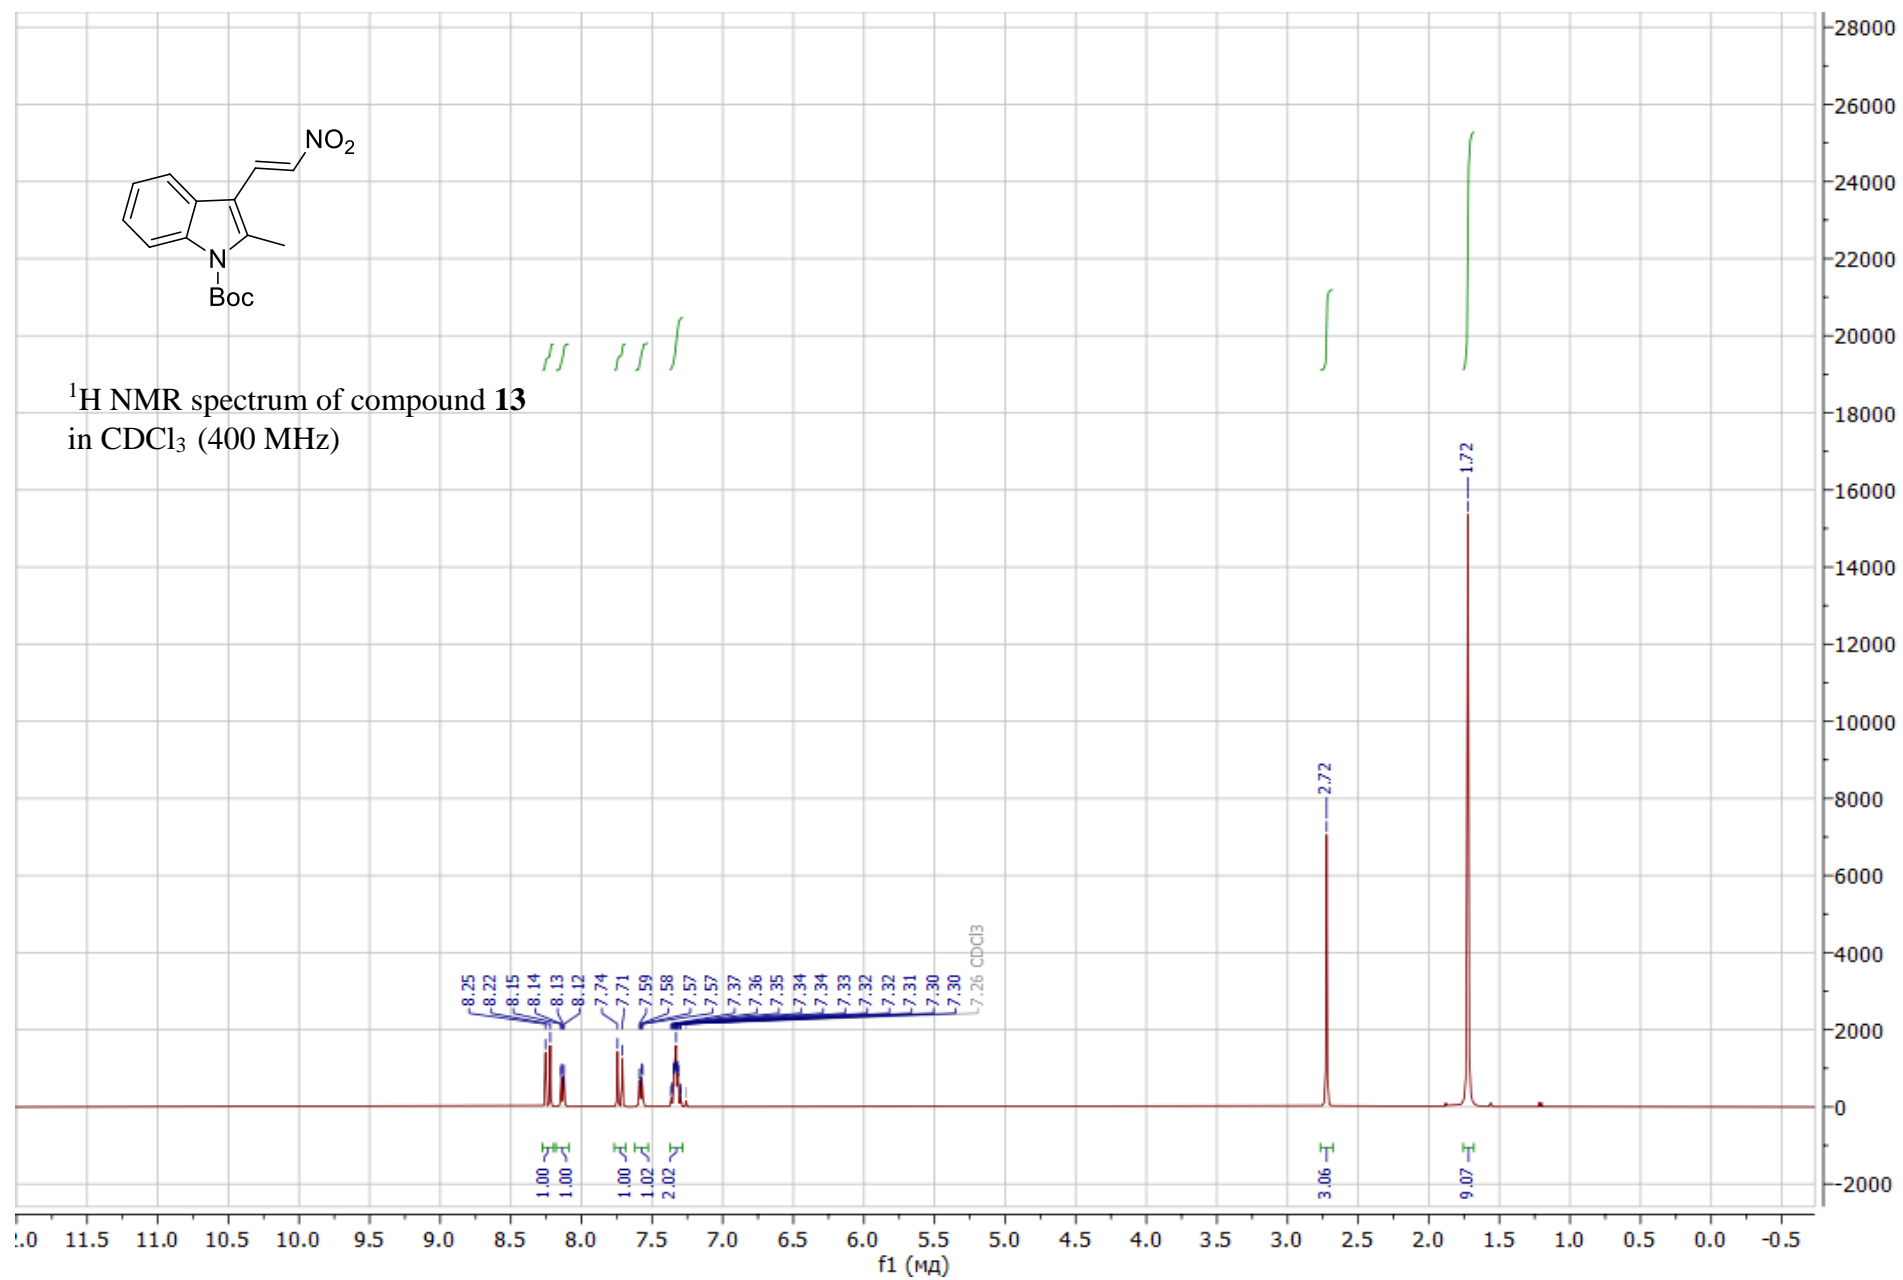

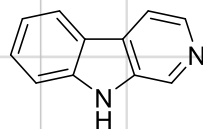

$^1\text{H}$  NMR spectrum of compound **12aa**  
in  $\text{CDCl}_3$  (400 MHz)

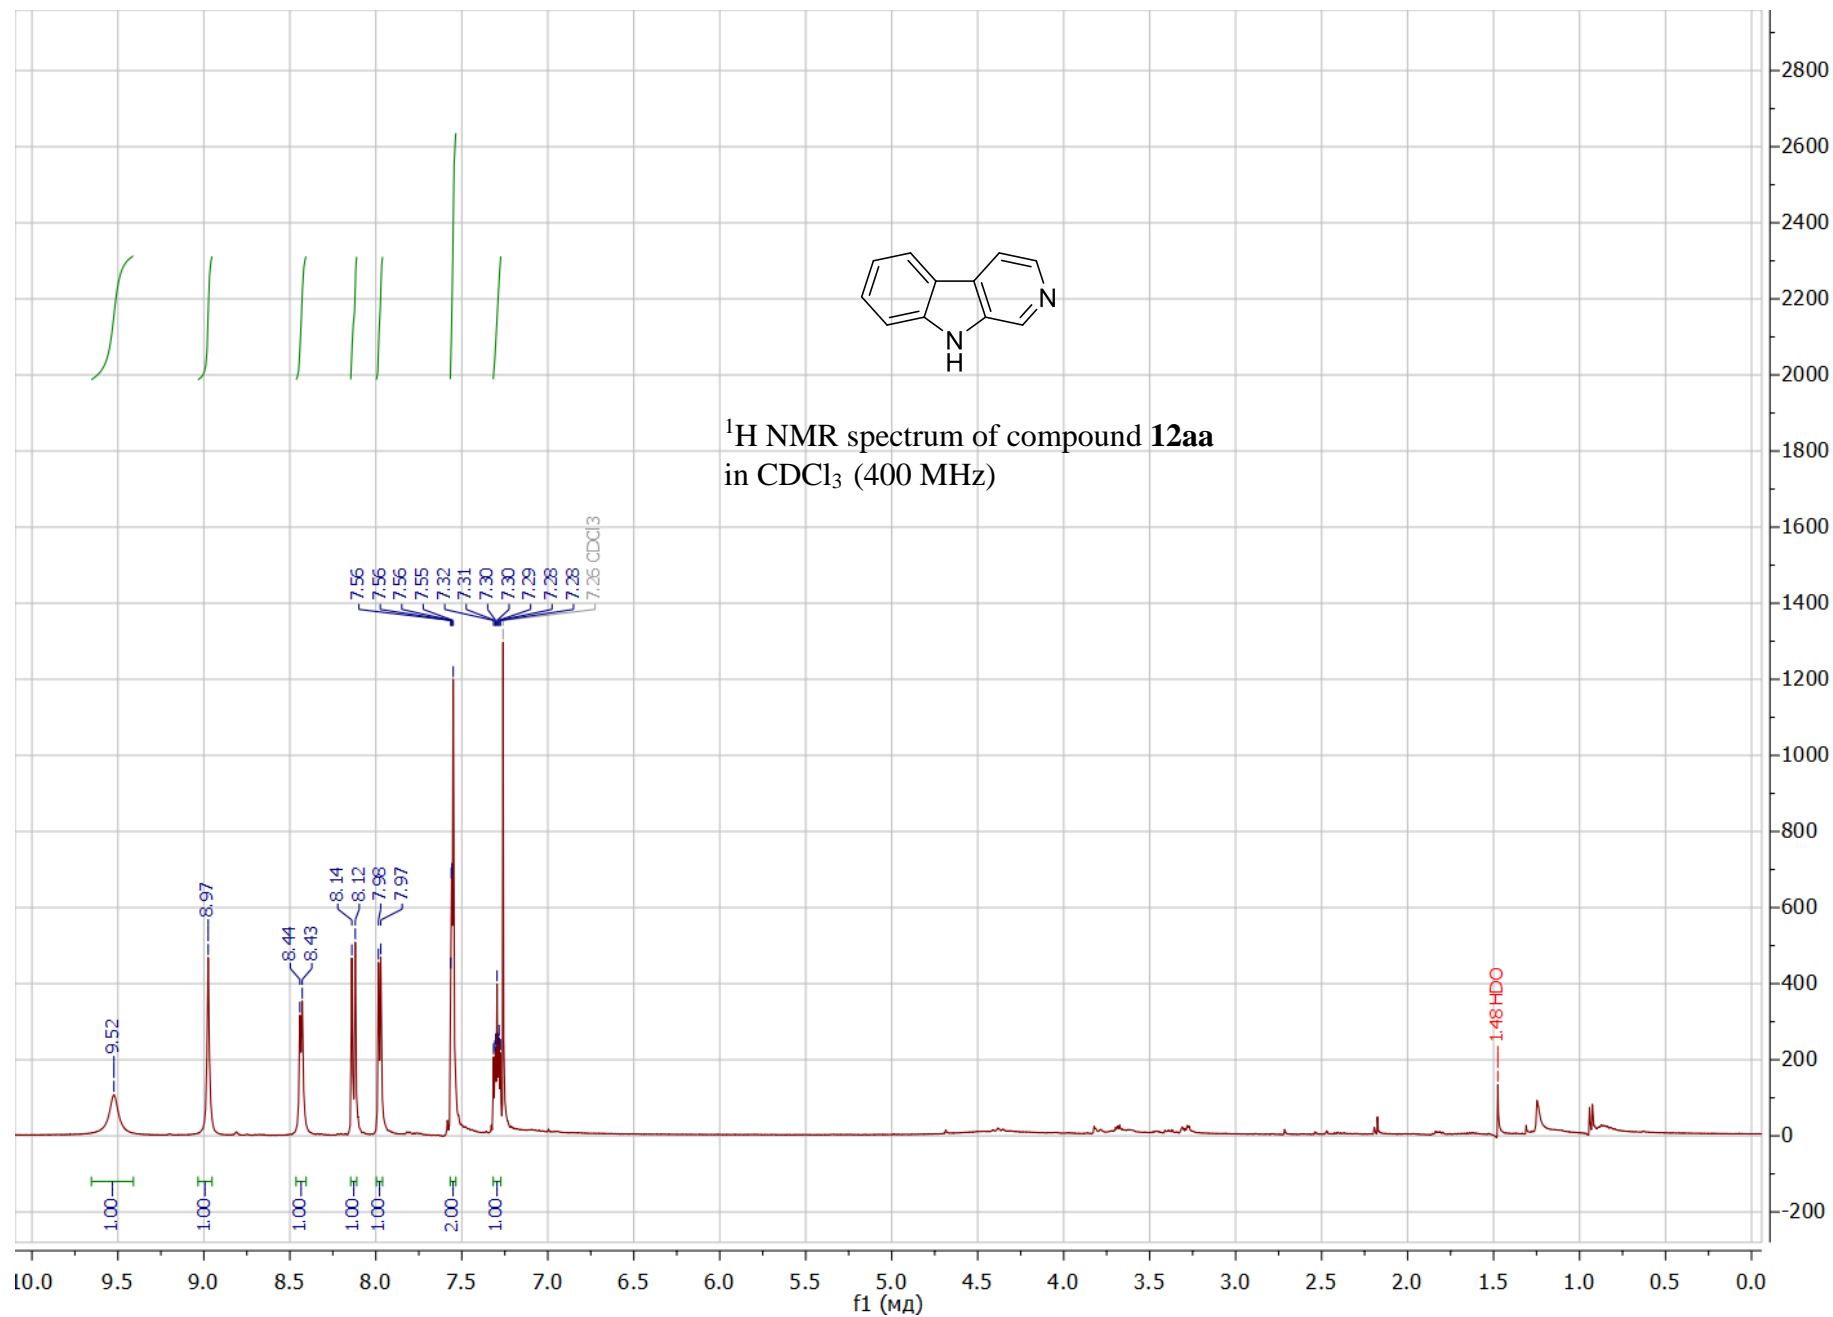

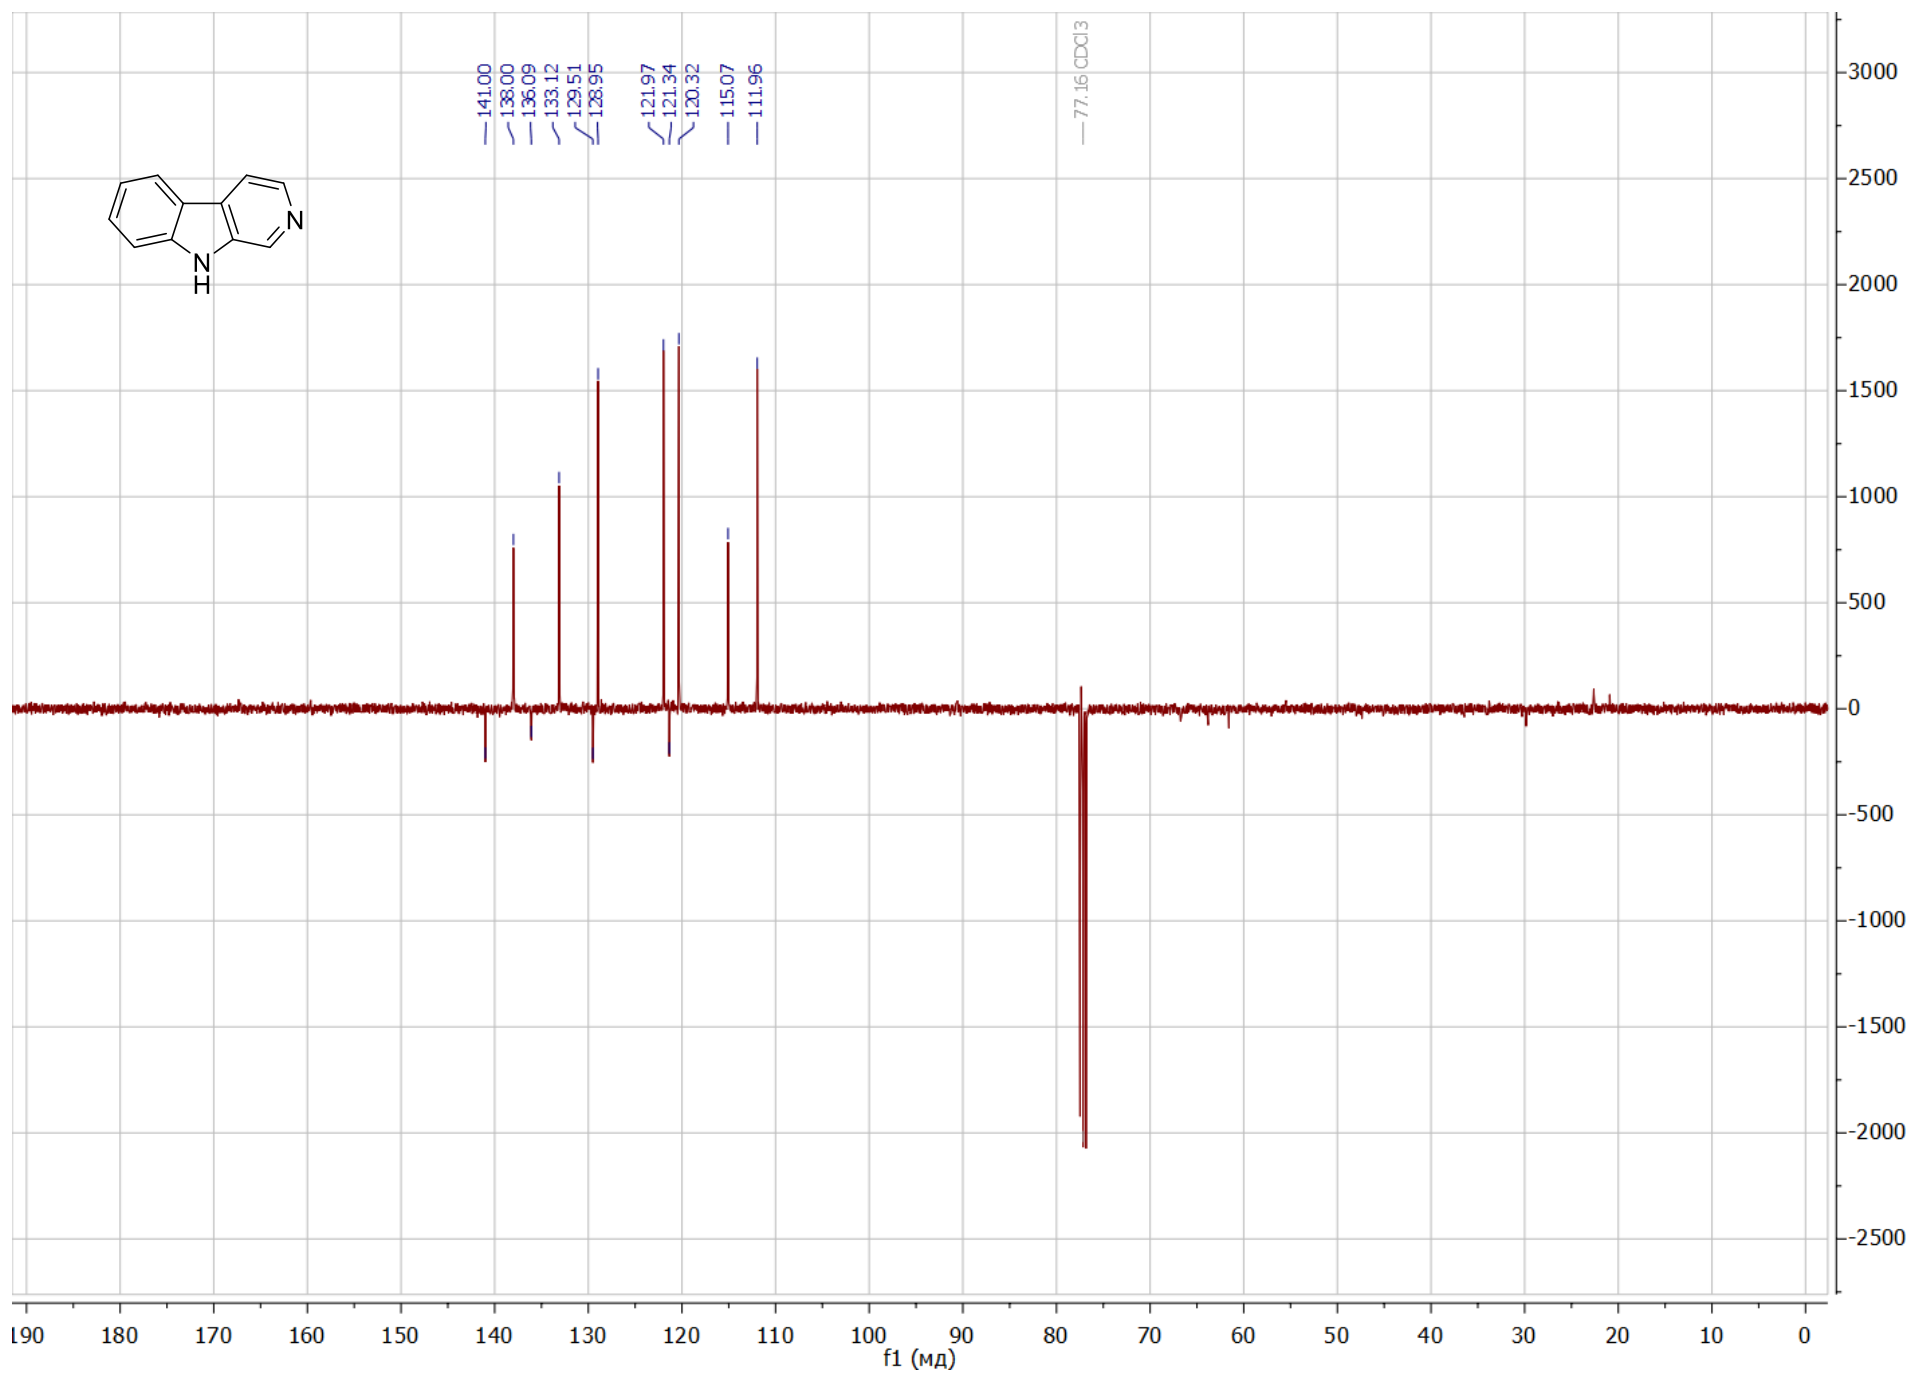

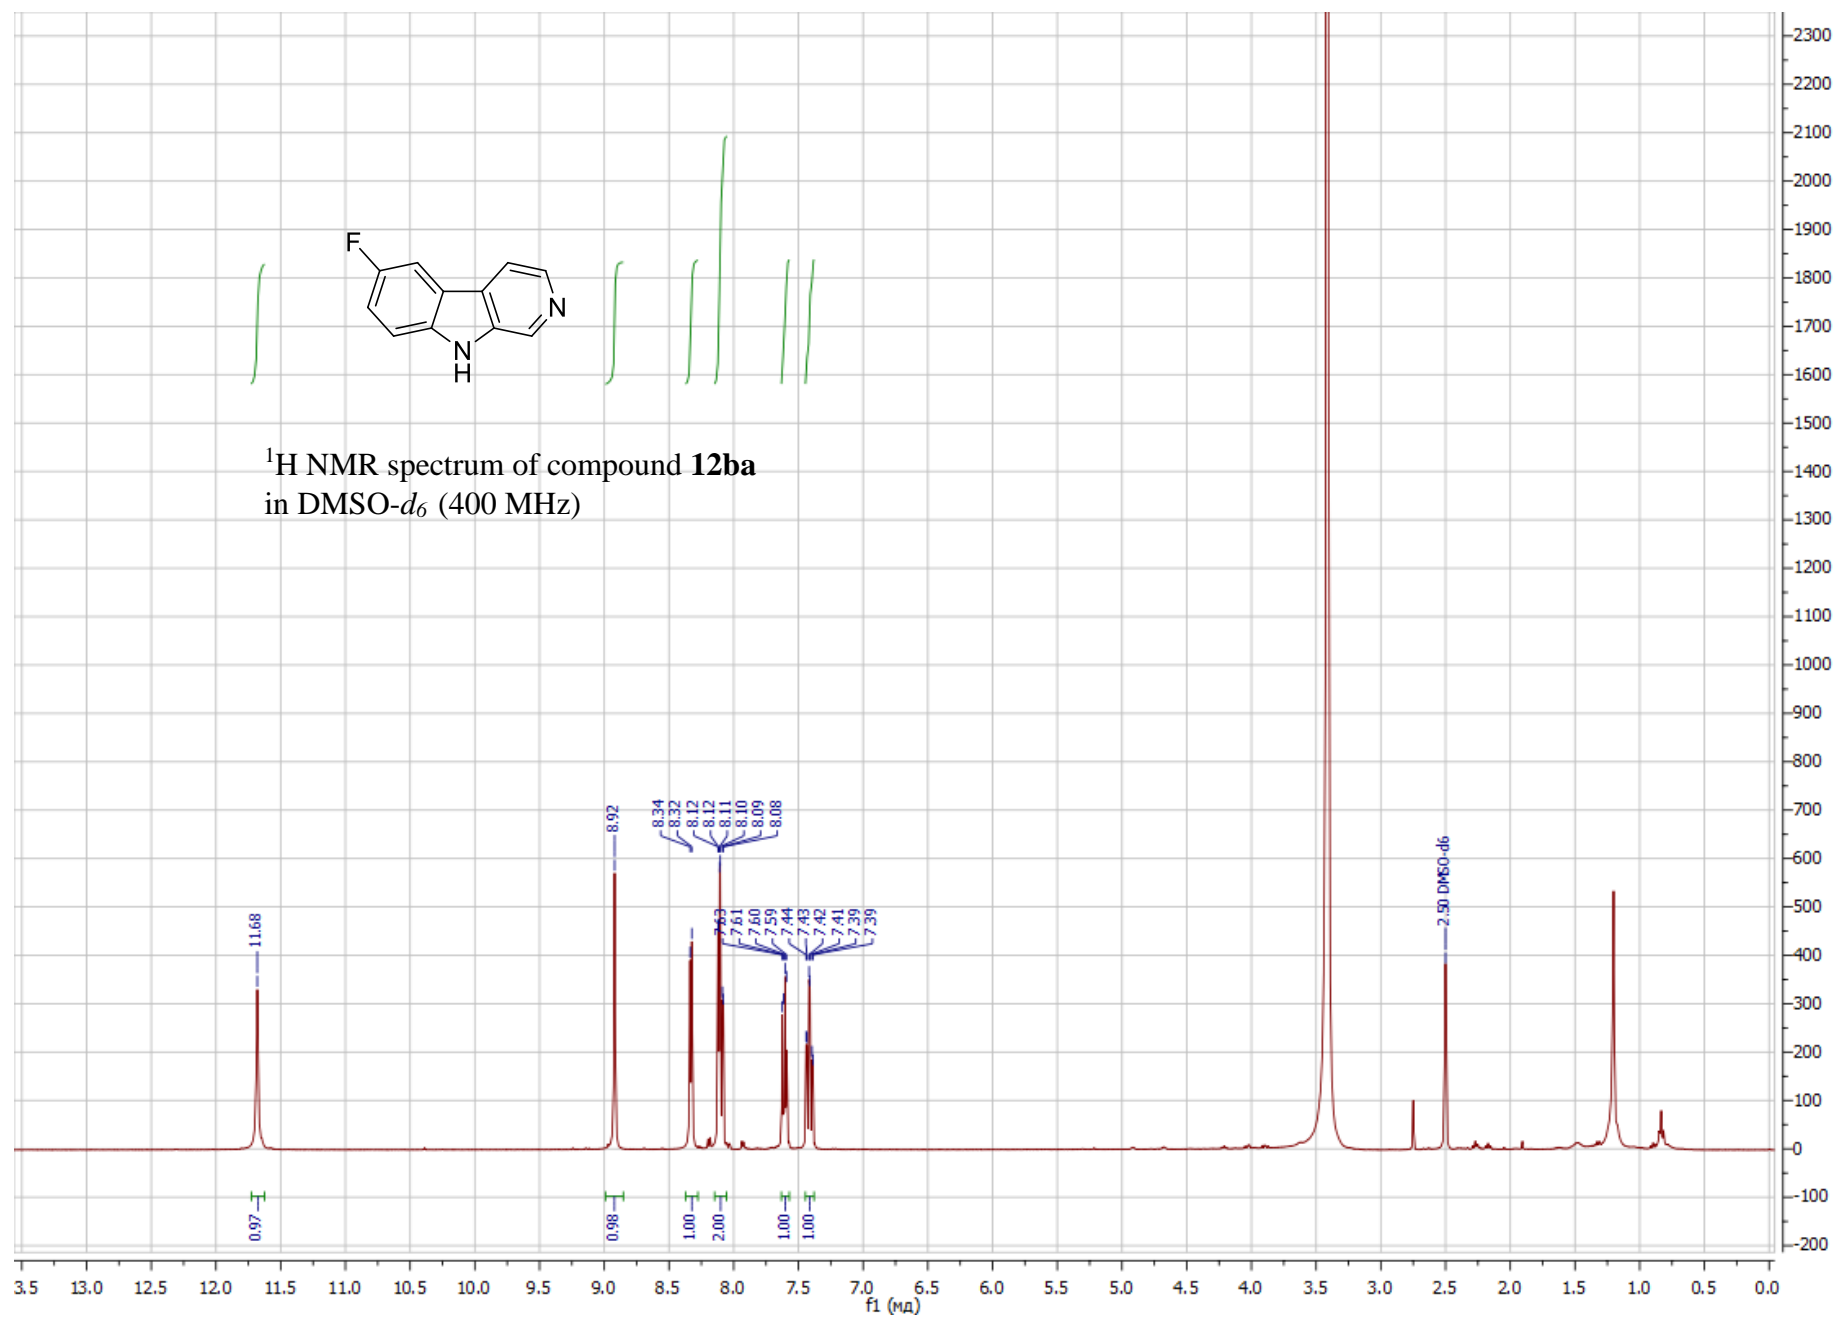

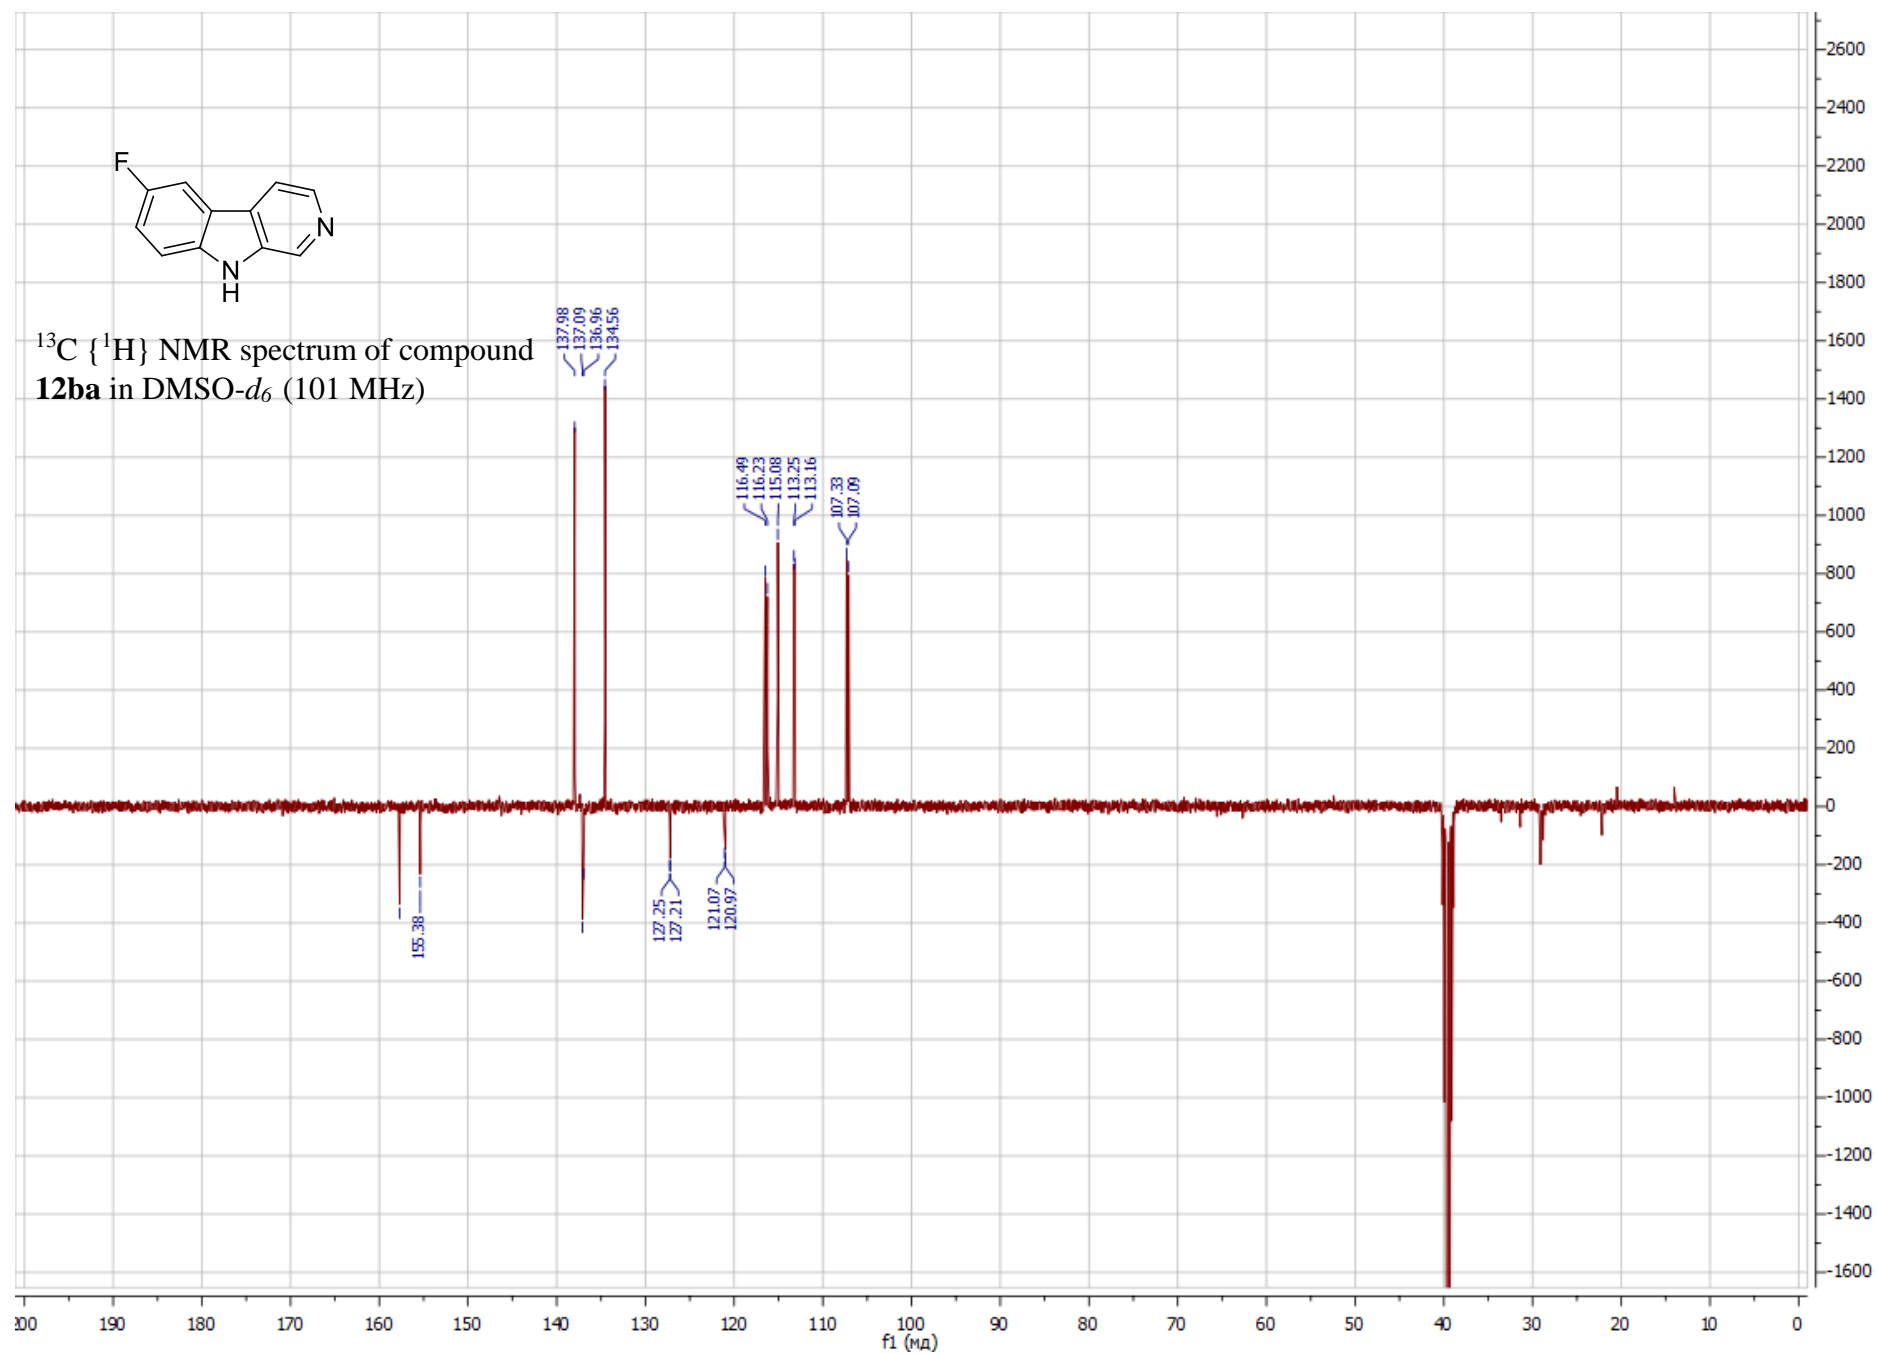

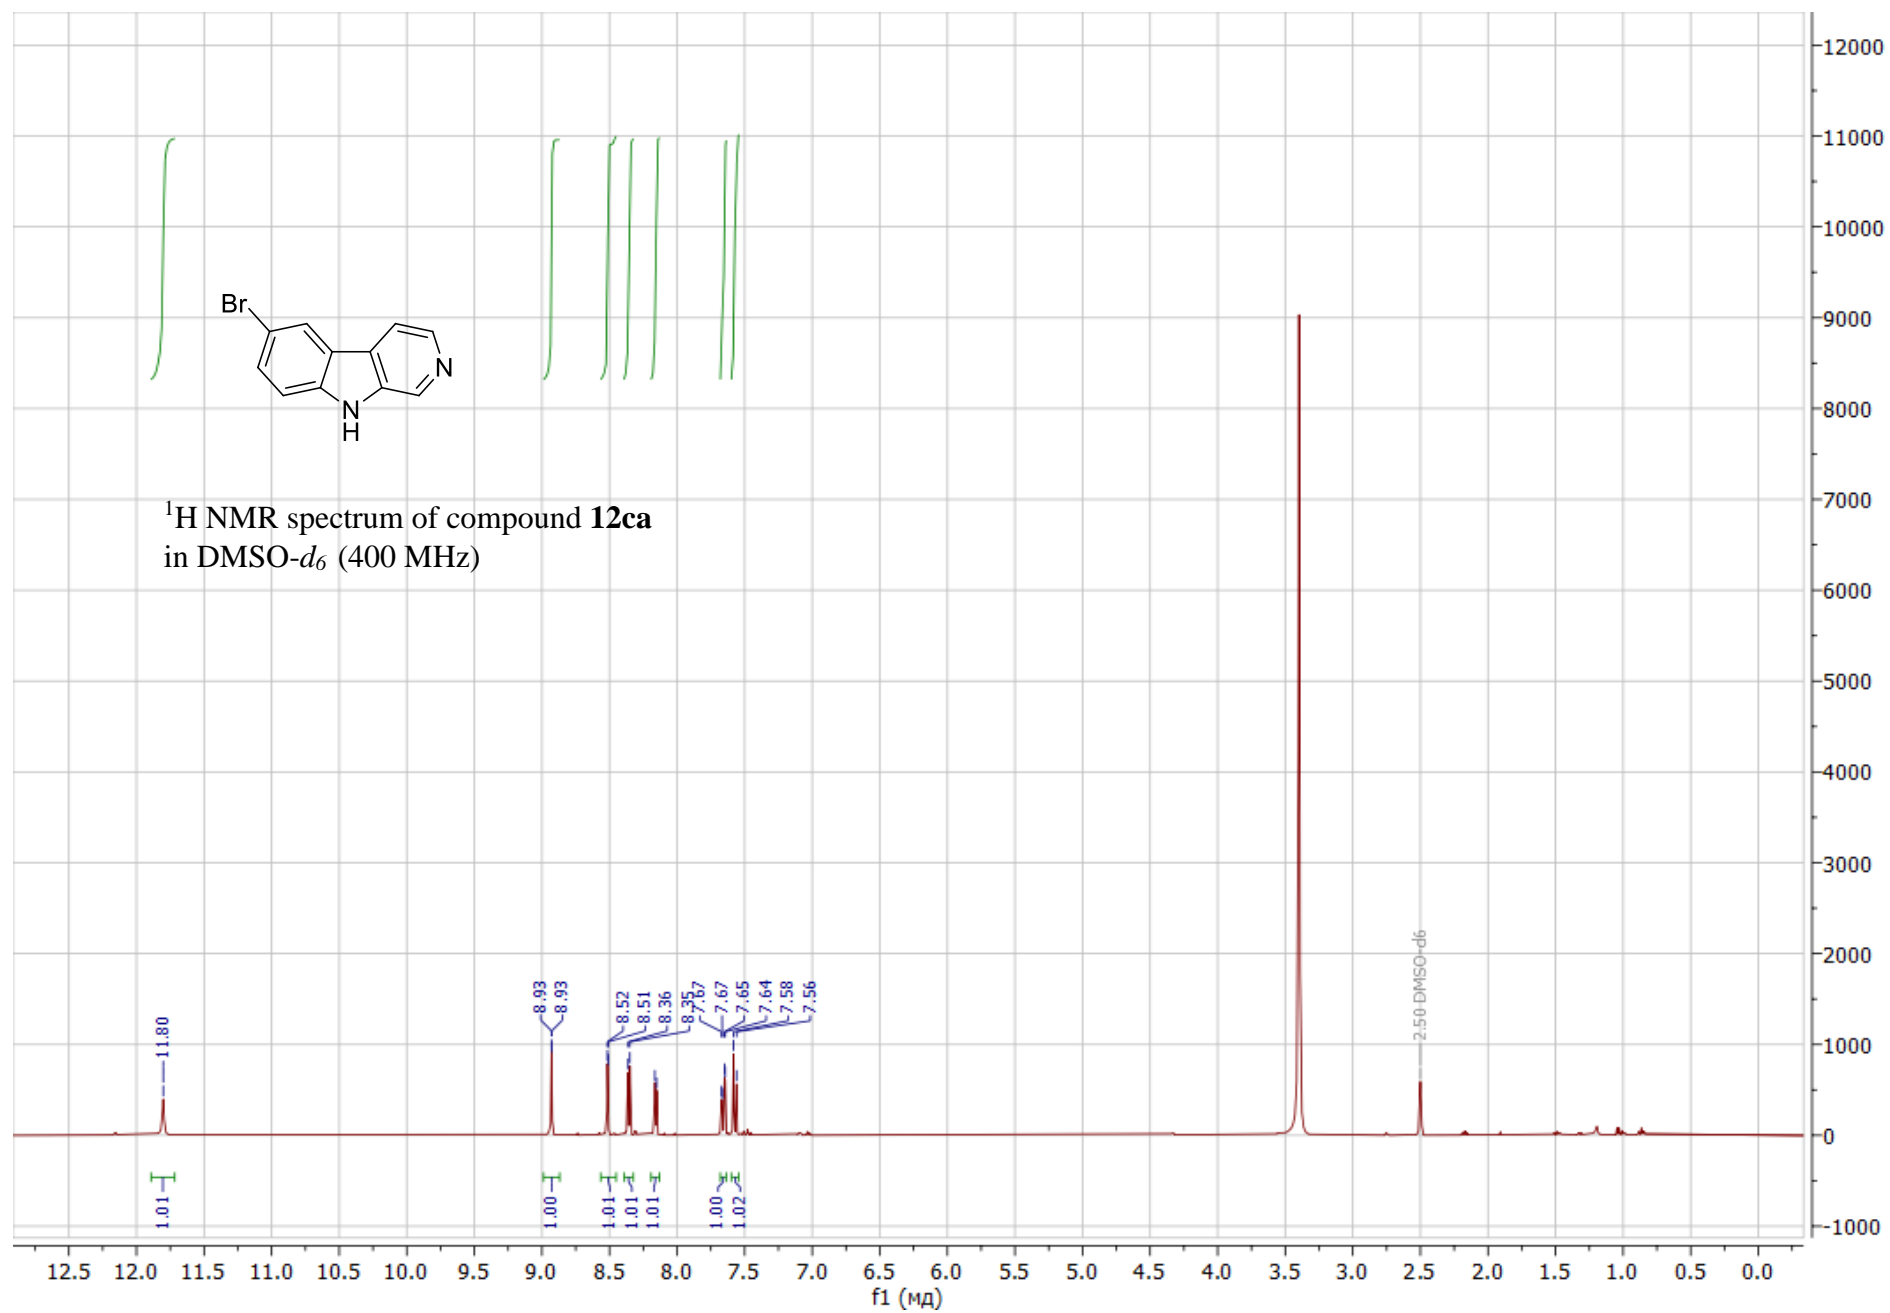

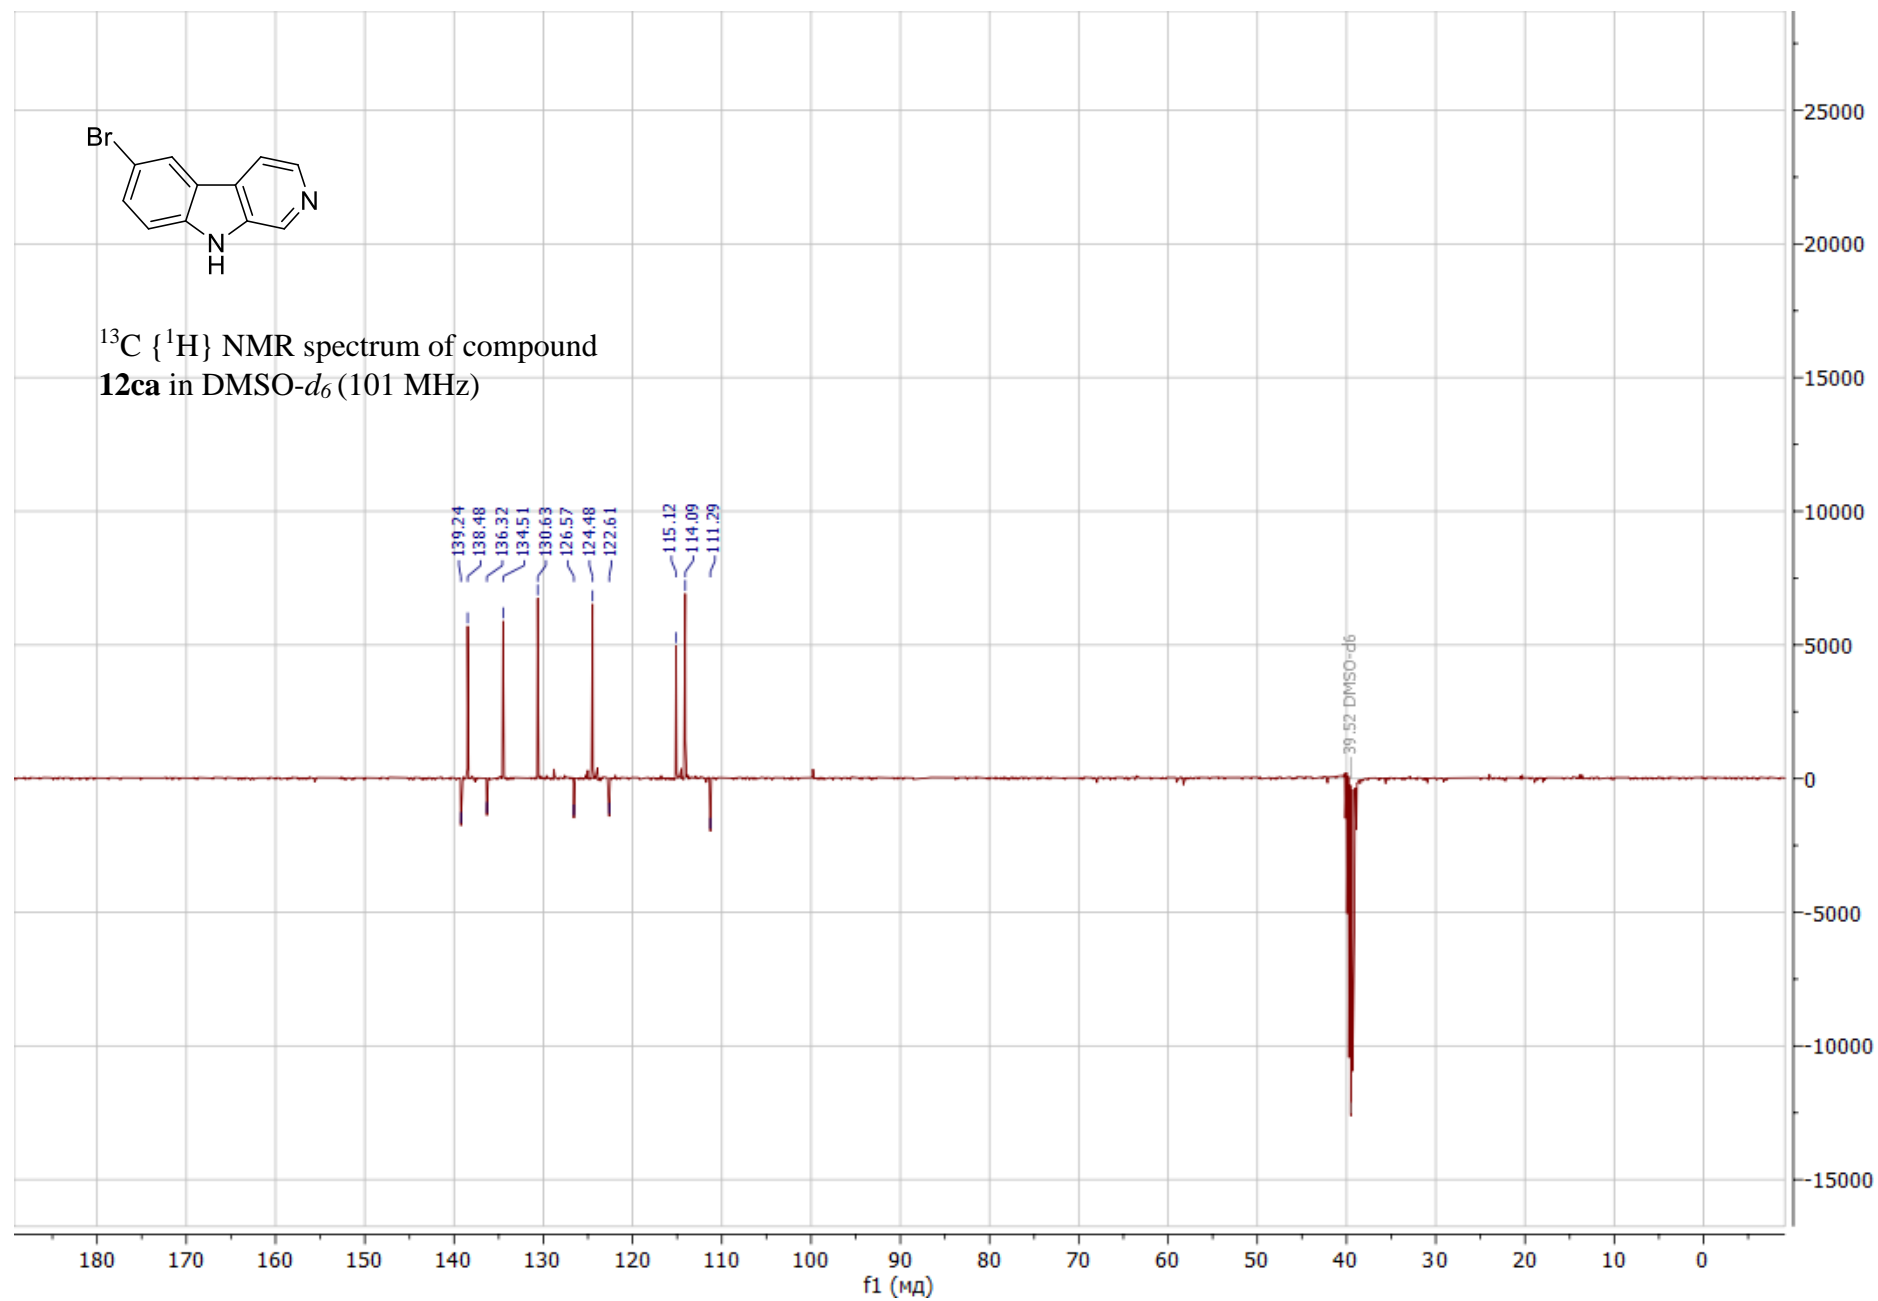



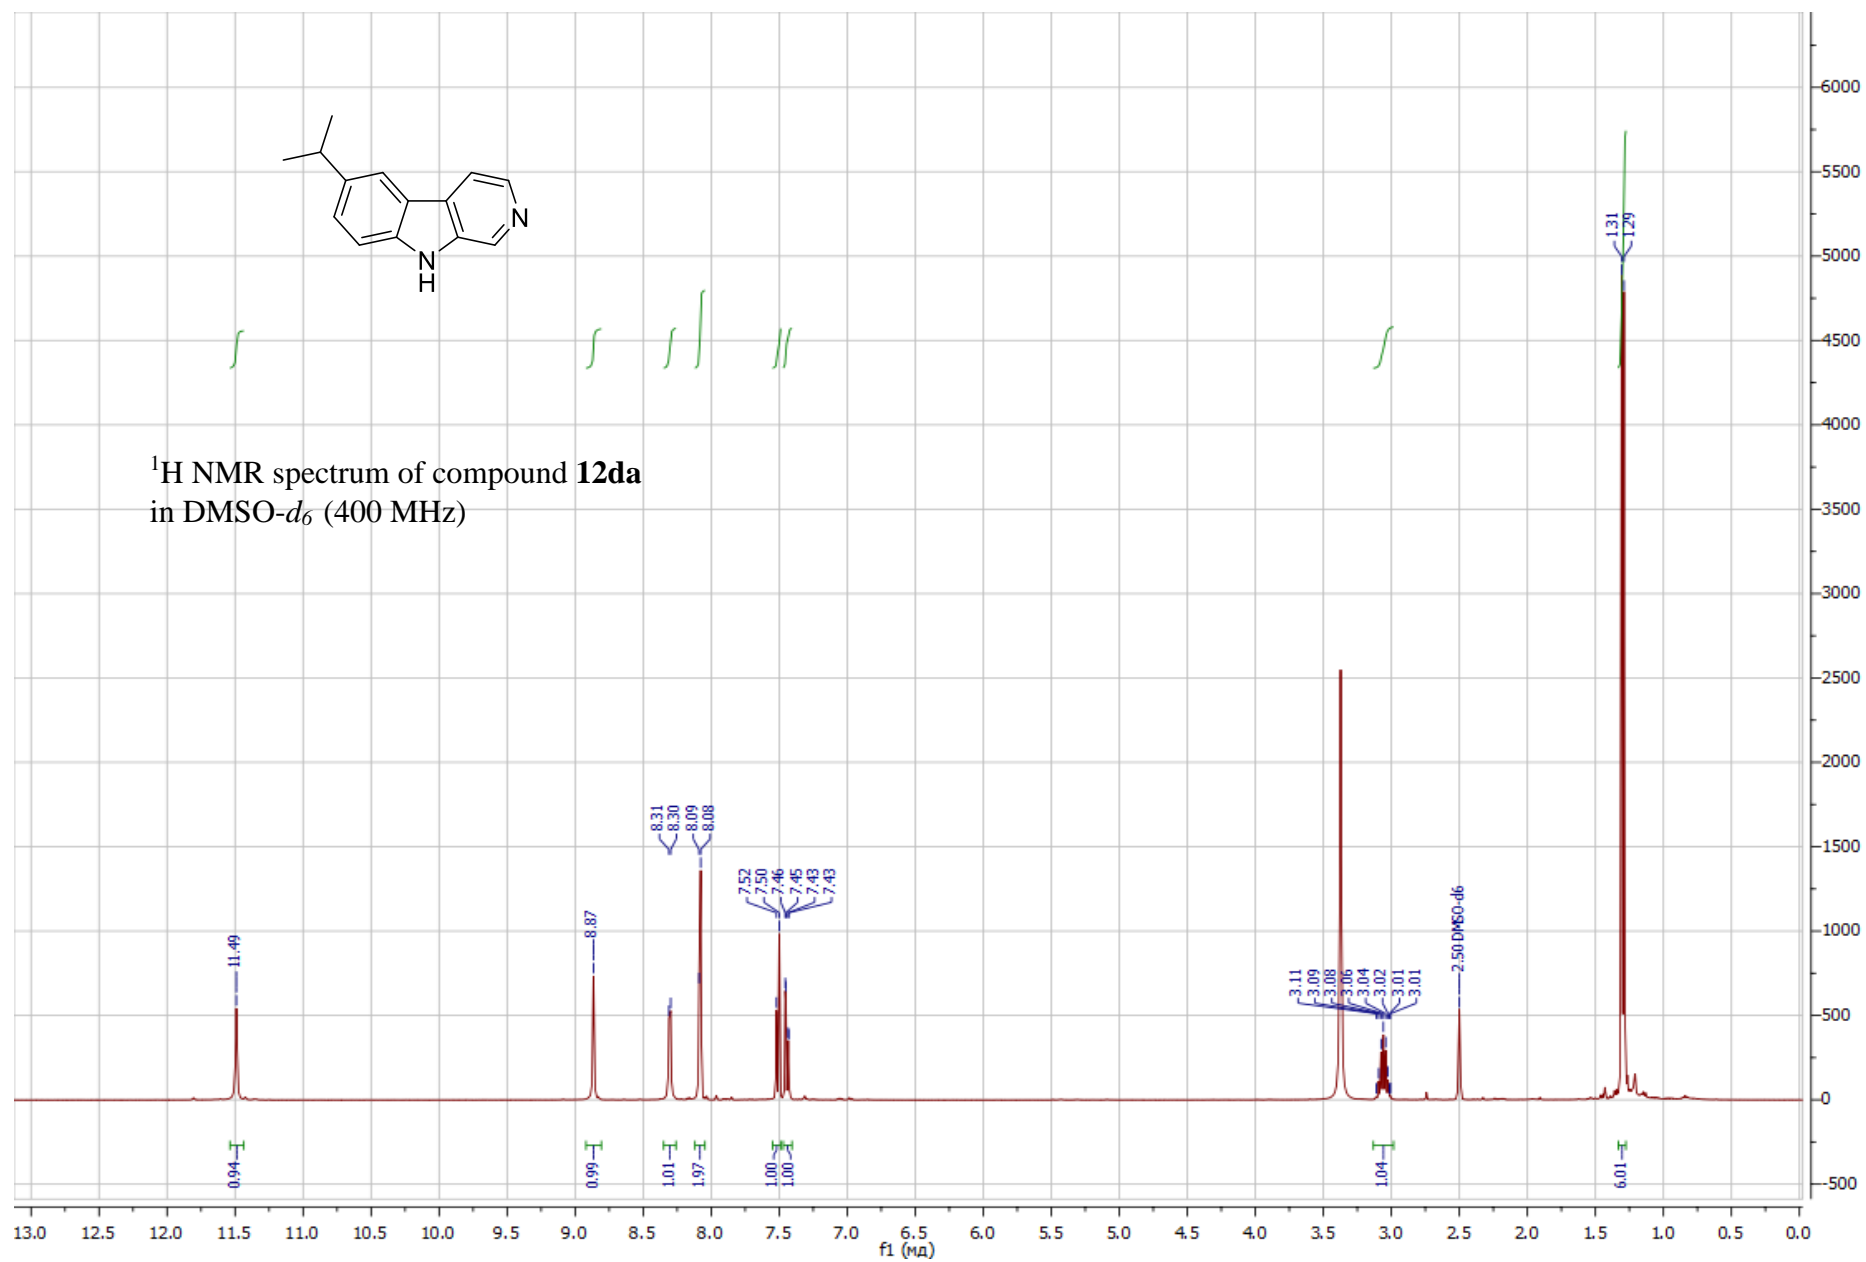

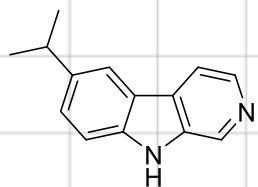

$^{13}\text{C}$  { $^1\text{H}$ } NMR spectrum of compound  
**12da** in DMSO- $d_6$  (101 MHz)

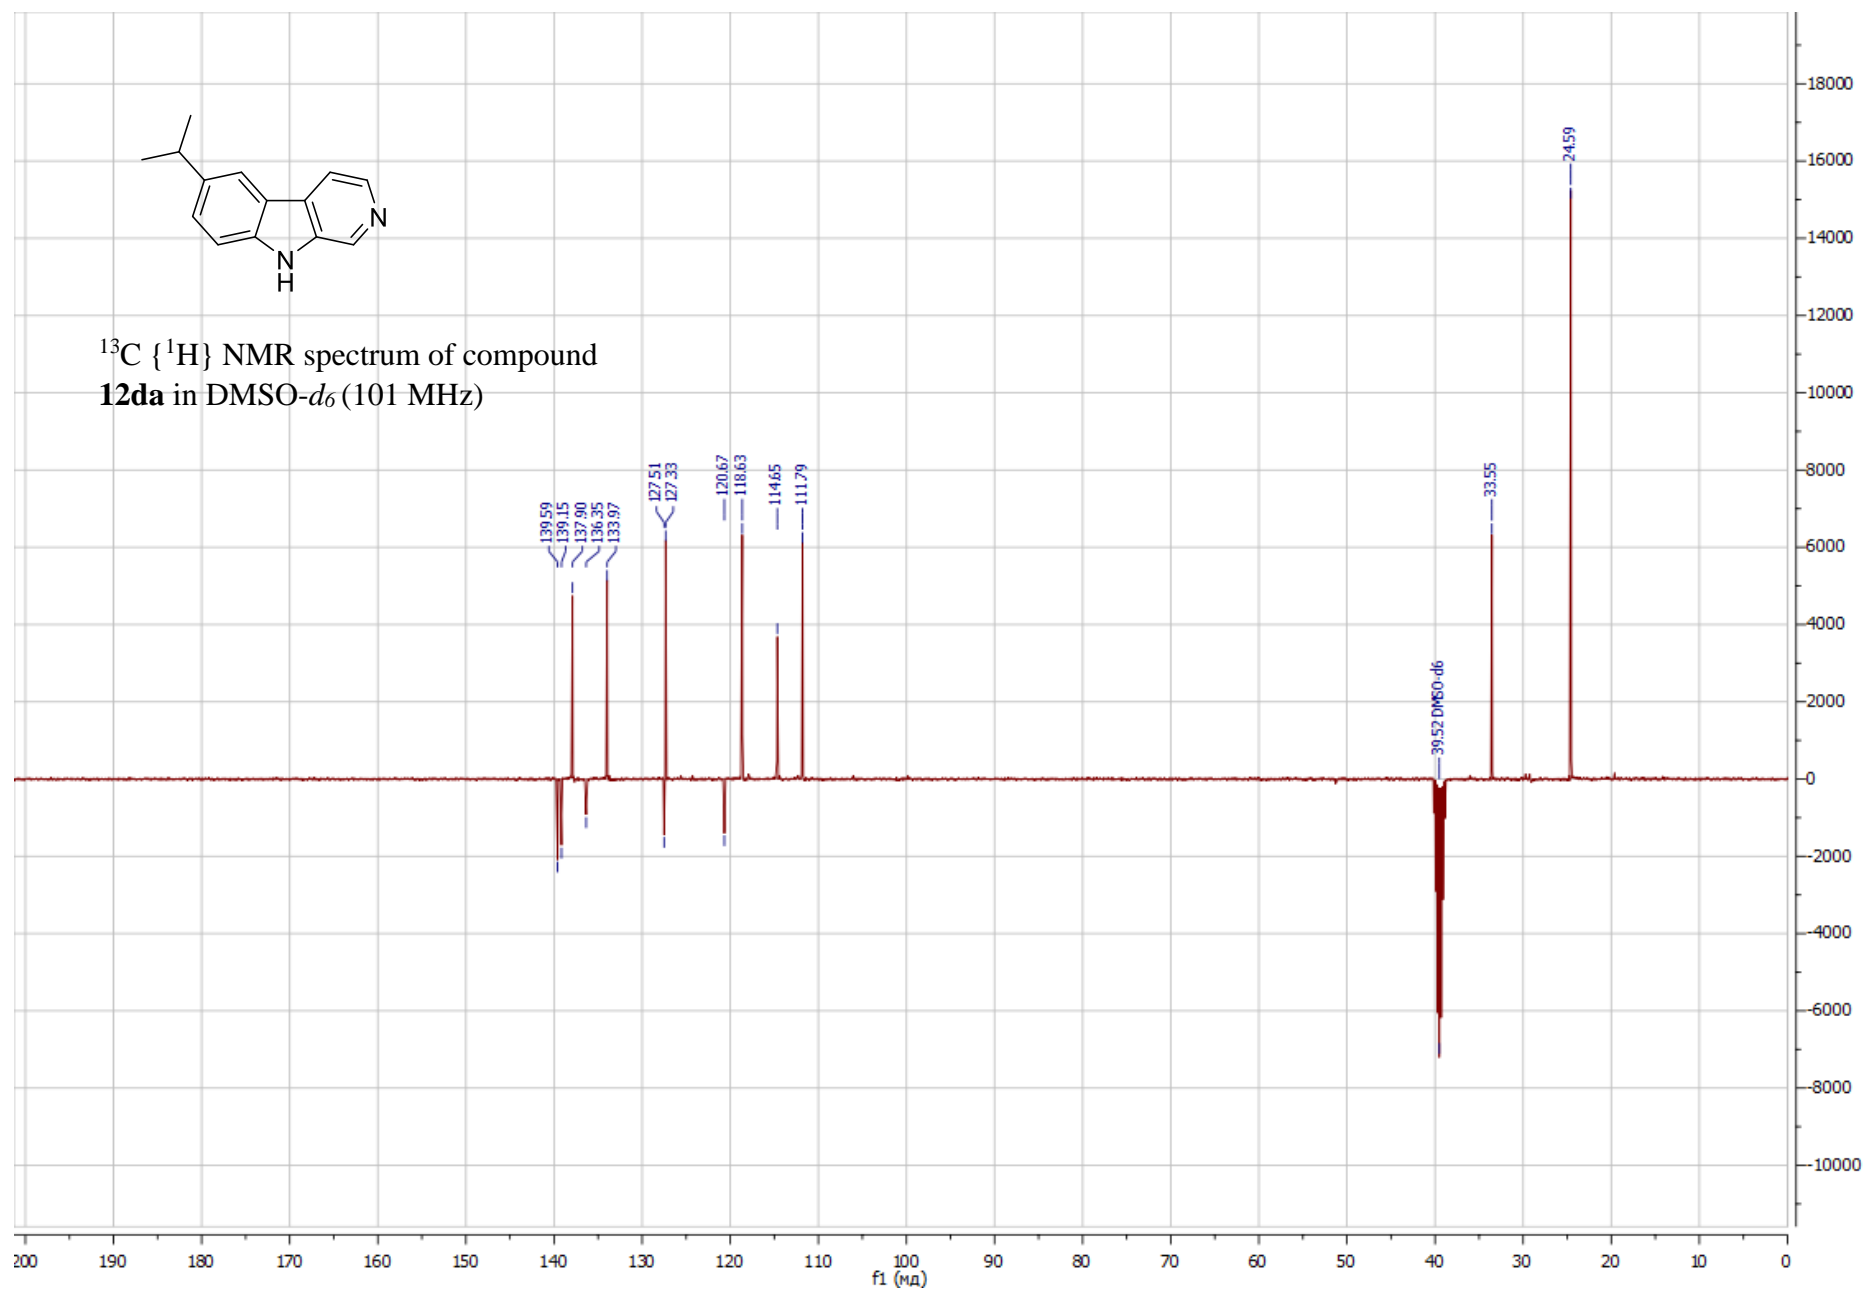

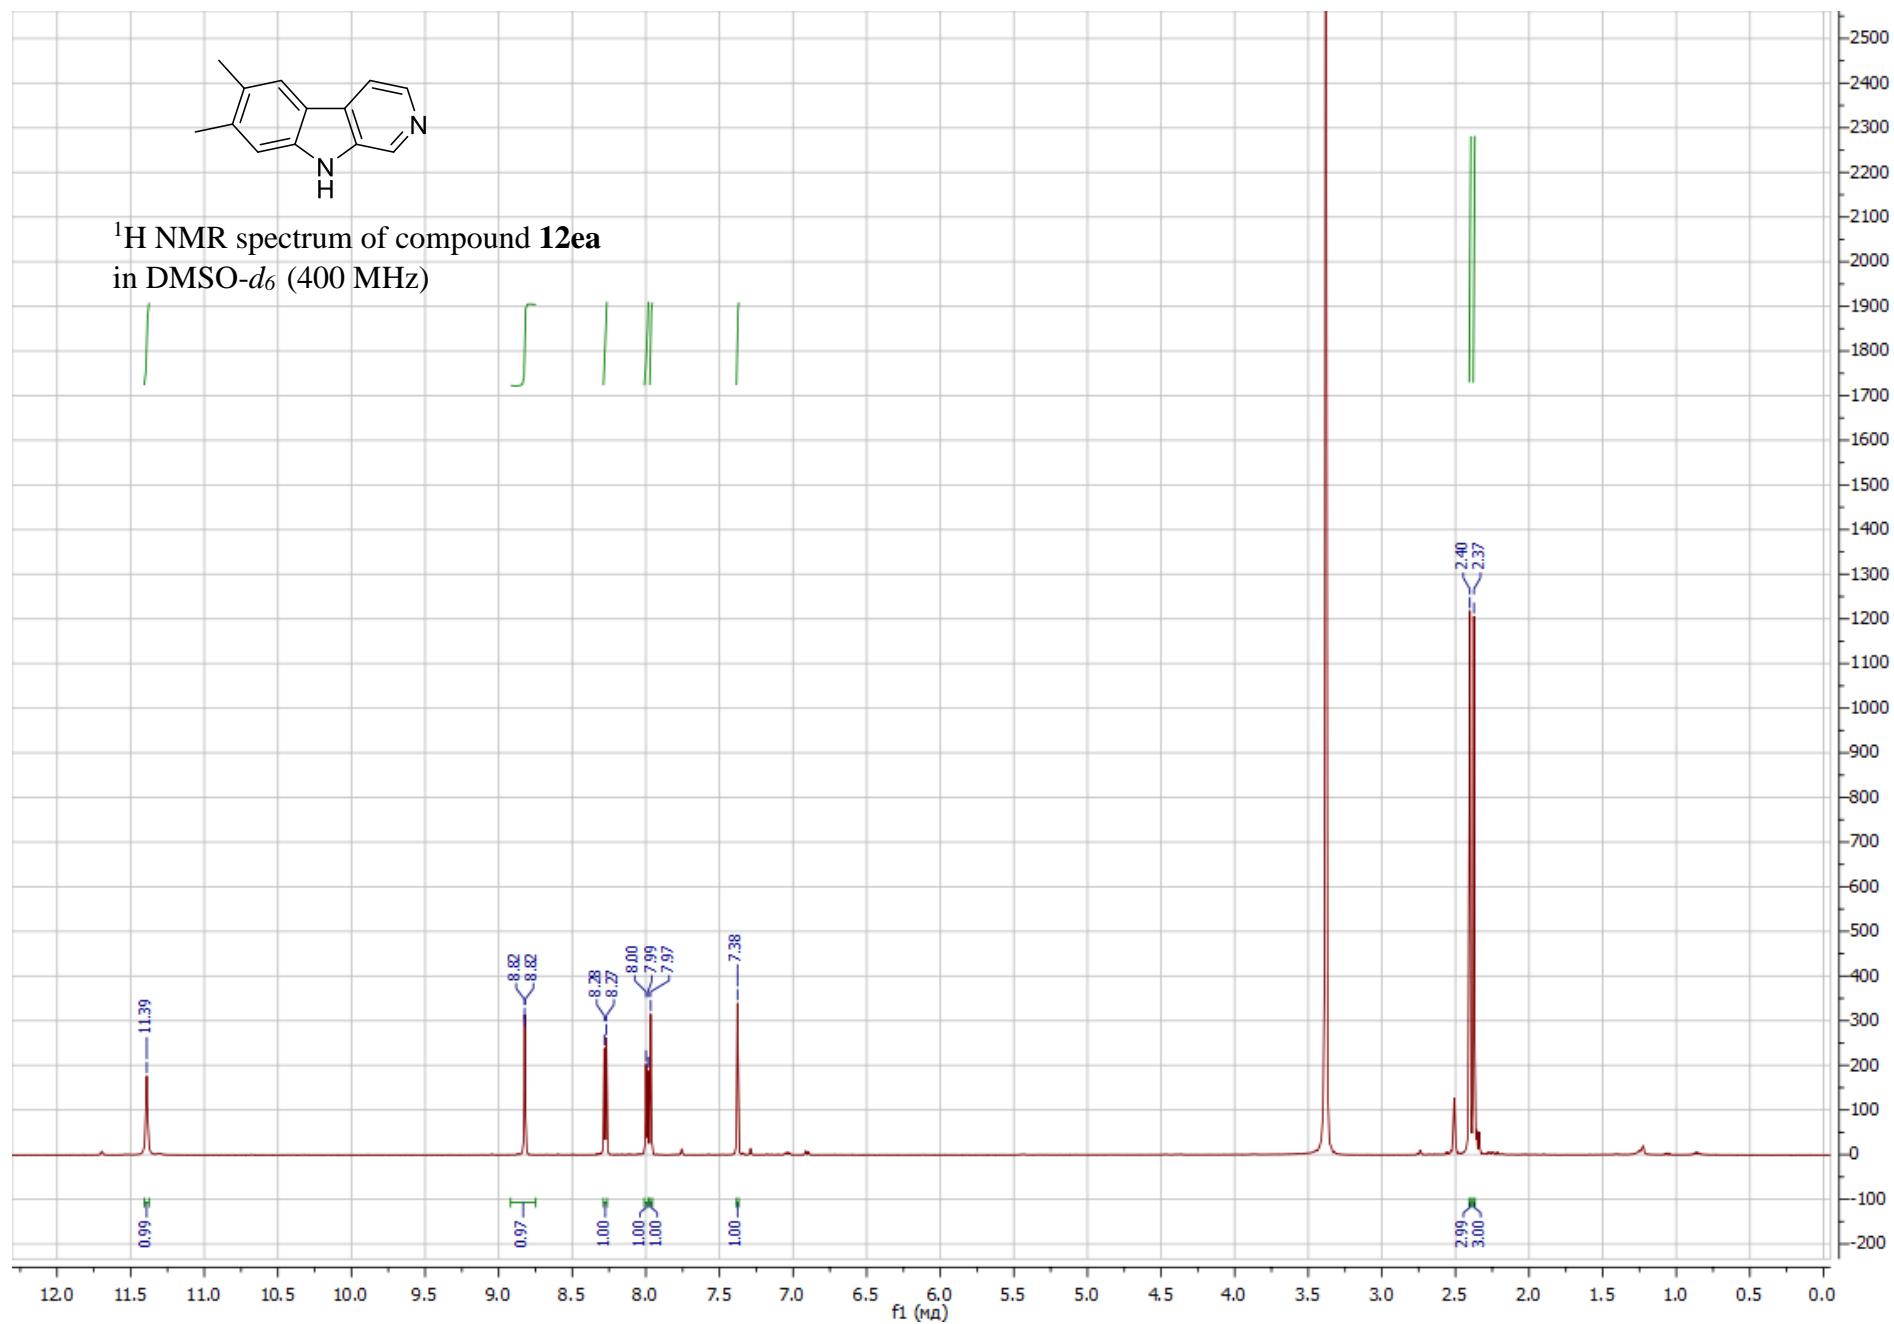

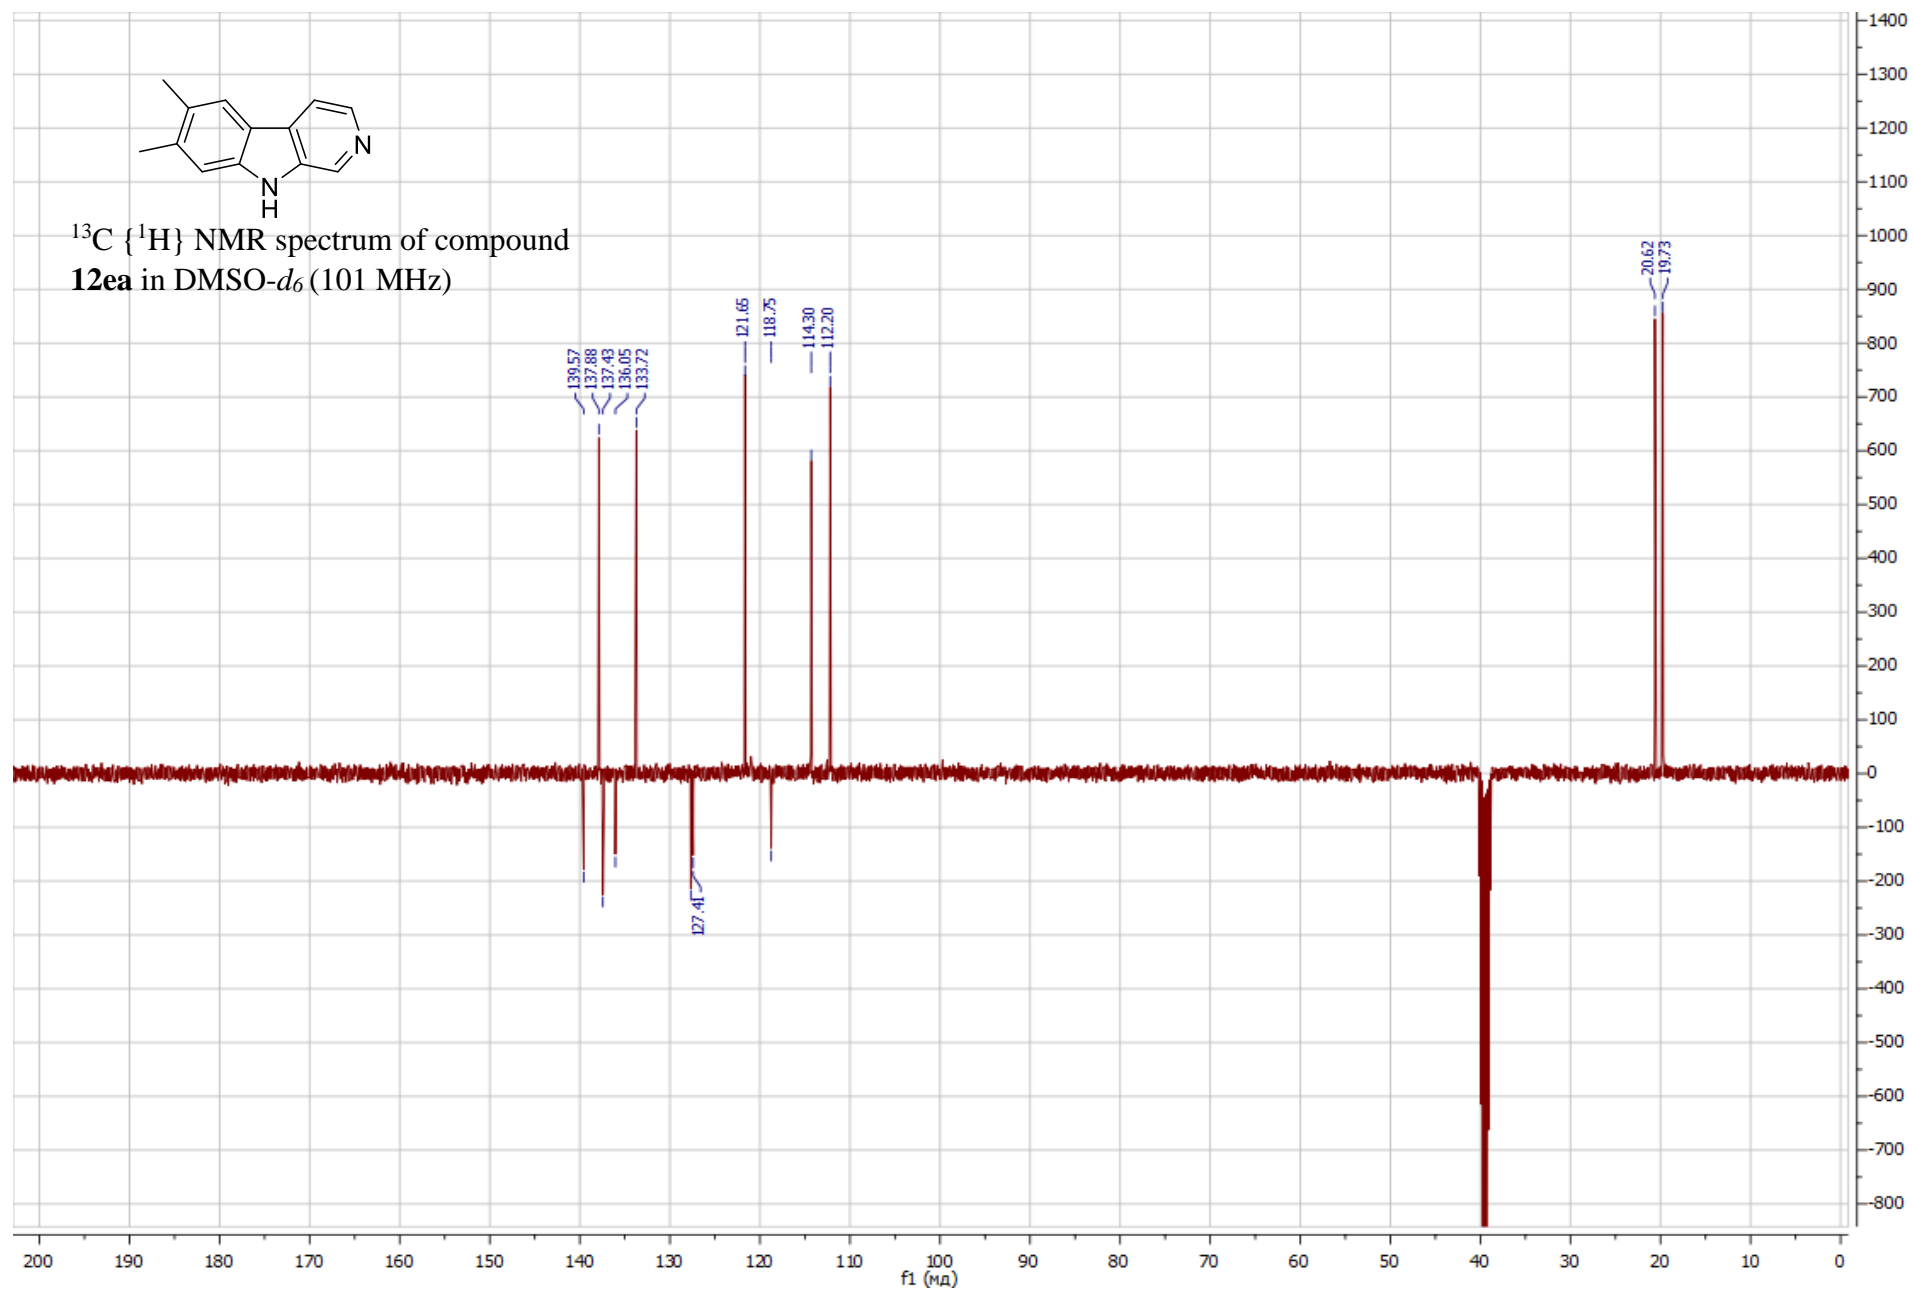

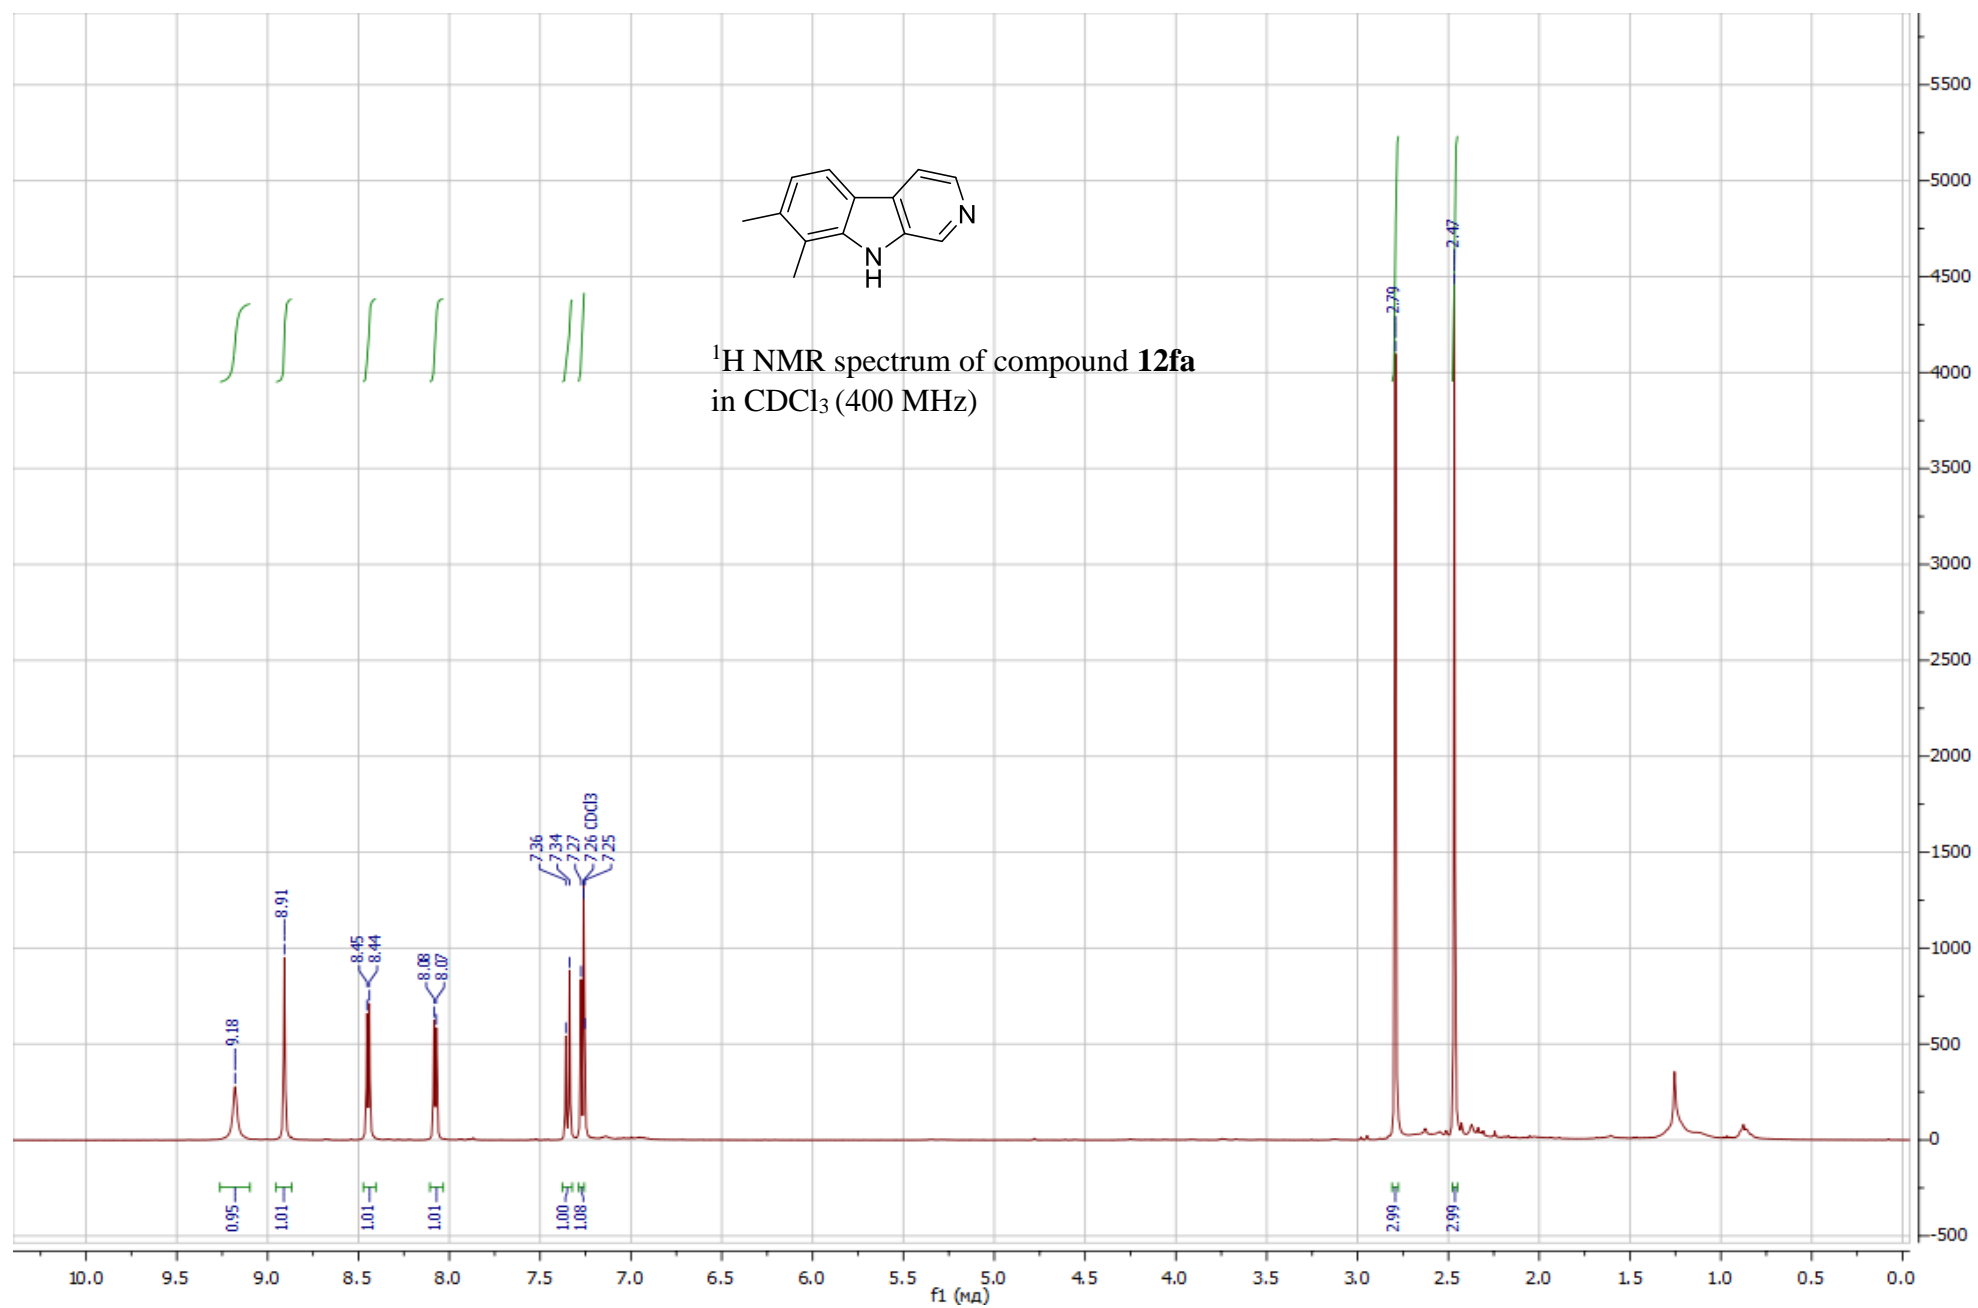

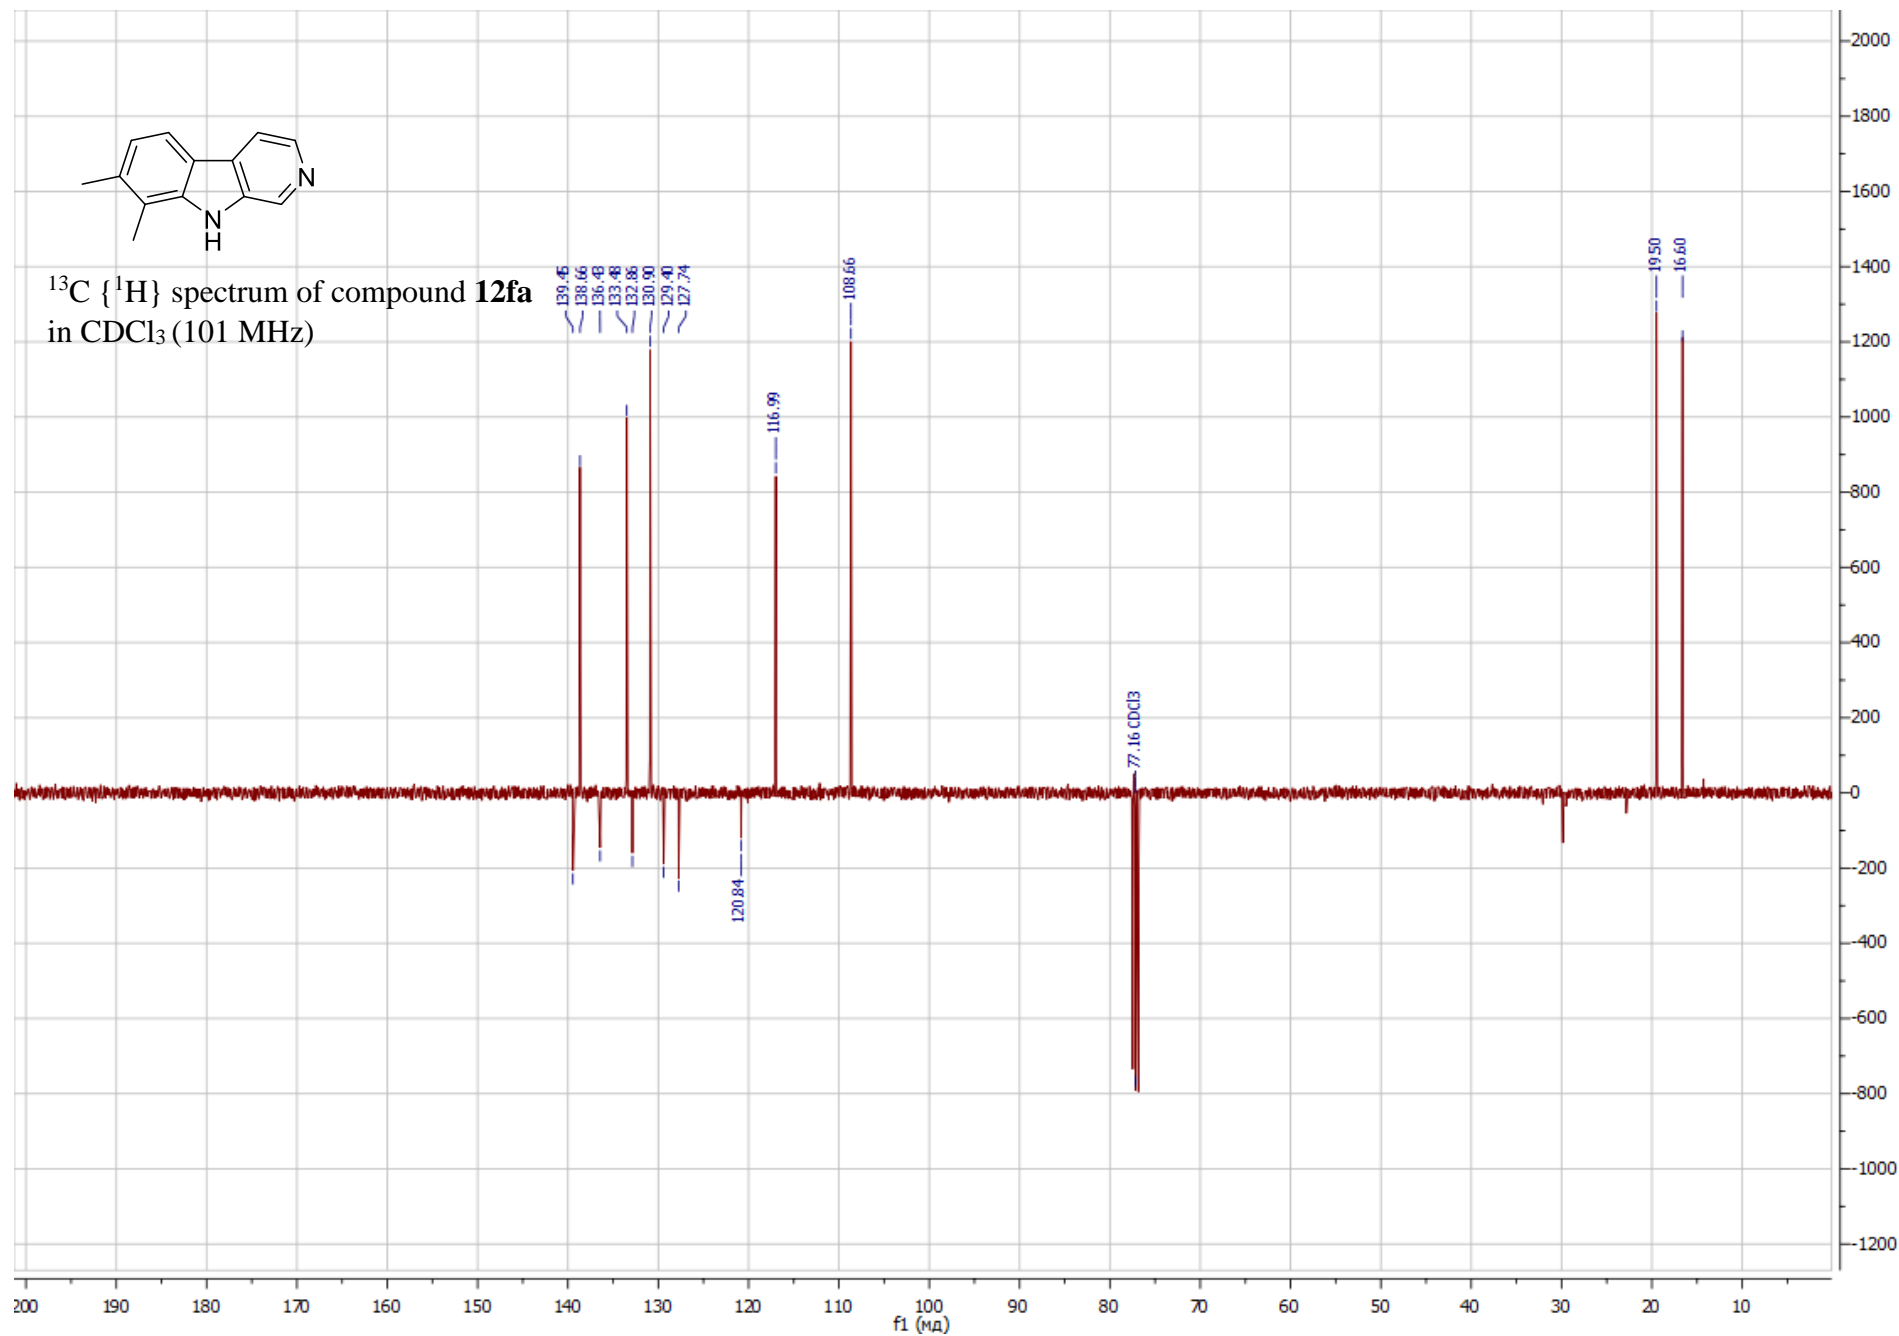

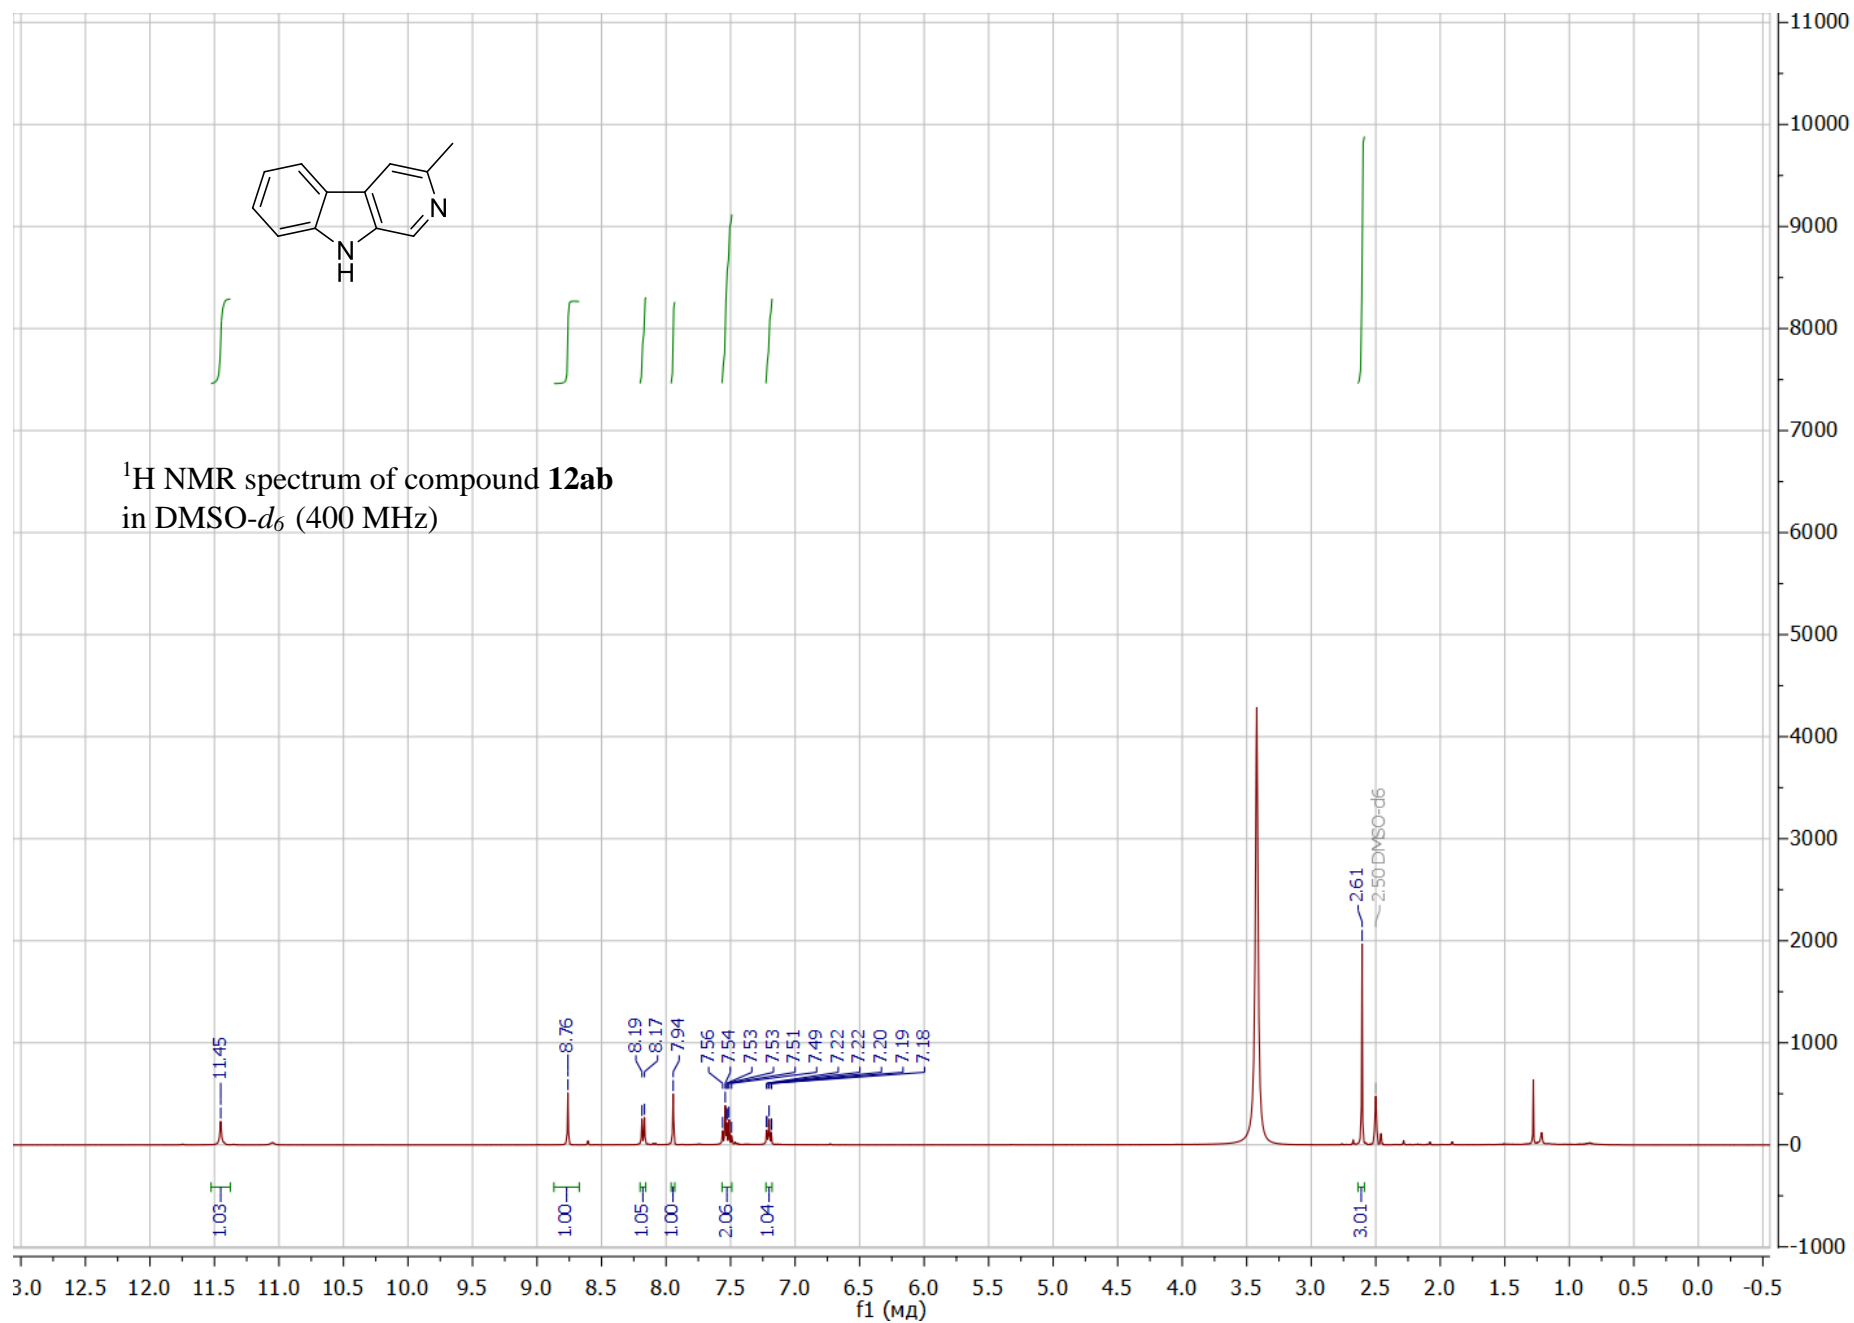

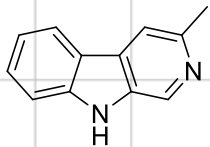

$^{13}\text{C}$  { $^1\text{H}$ } NMR spectrum of compound **12ab** in DMSO- $d_6$  (101 MHz)

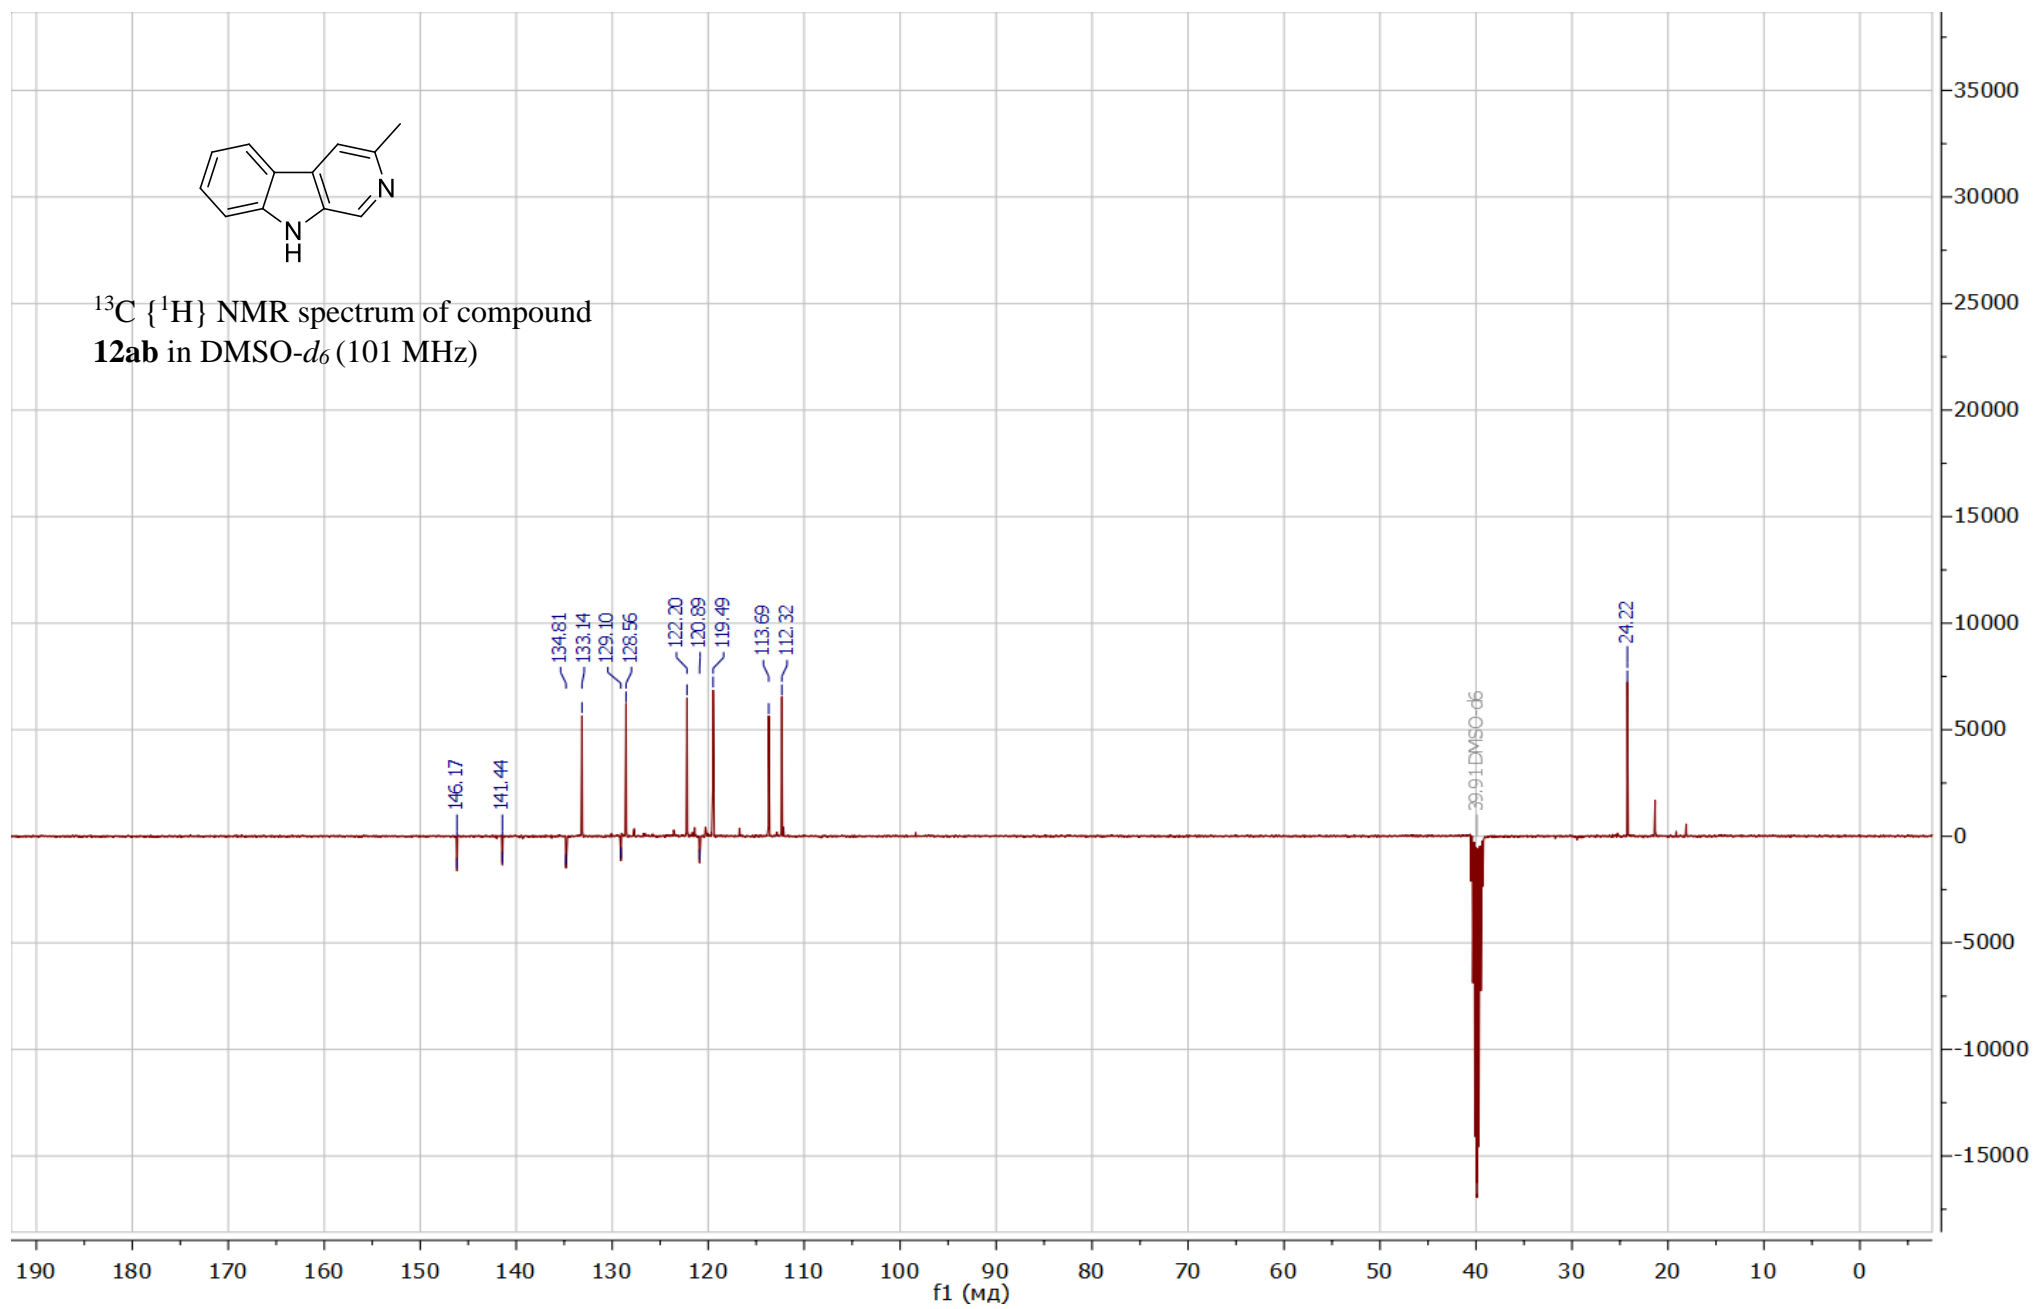



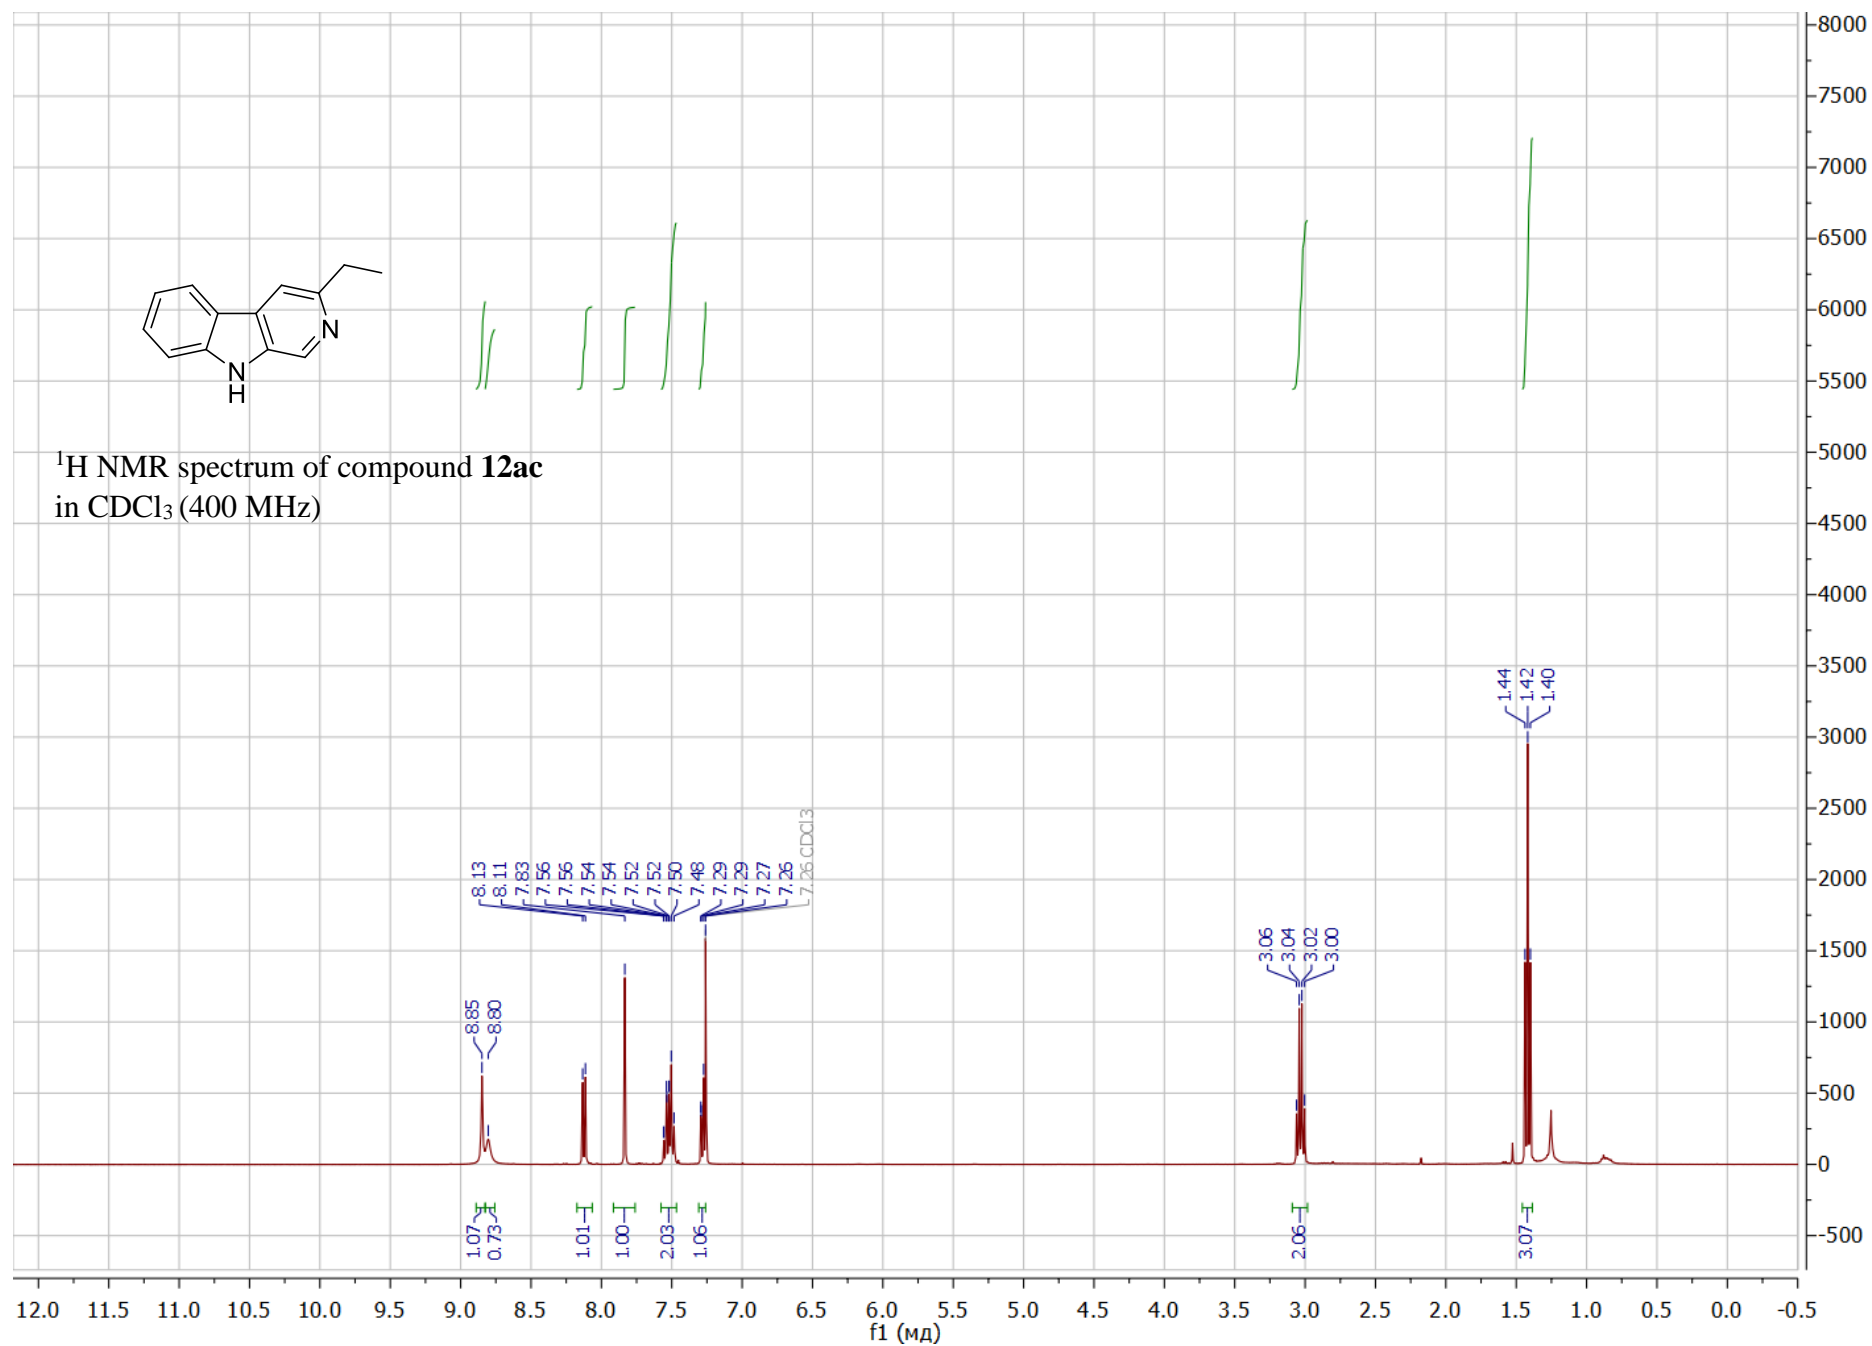

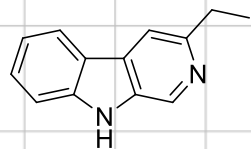

$^{13}\text{C}$  { $^1\text{H}$ } spectrum of compound **12ac**  
in  $\text{CDCl}_3$  (101 MHz)

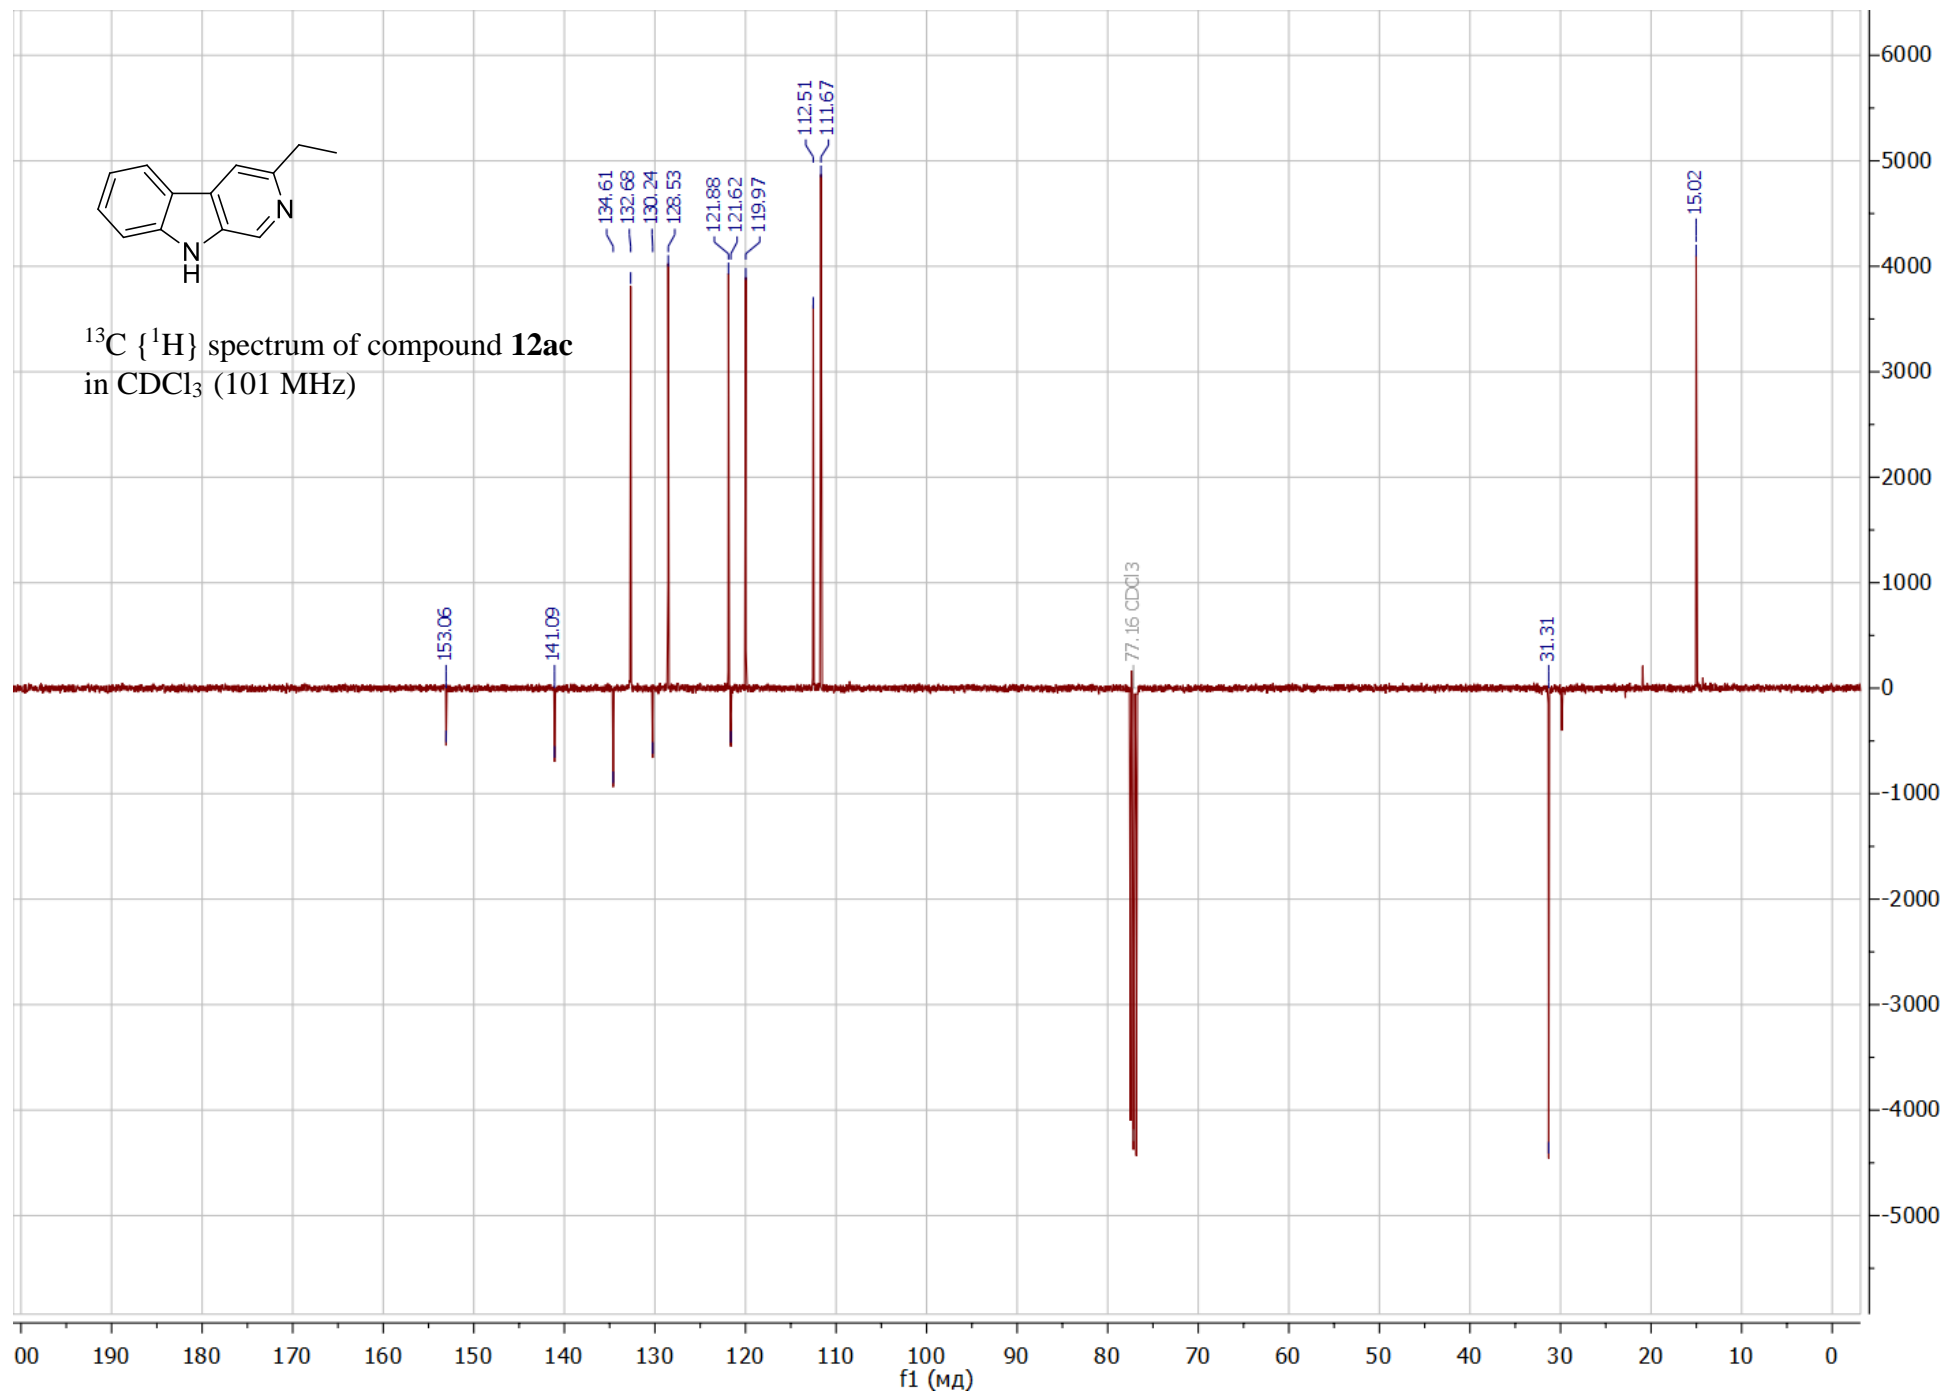

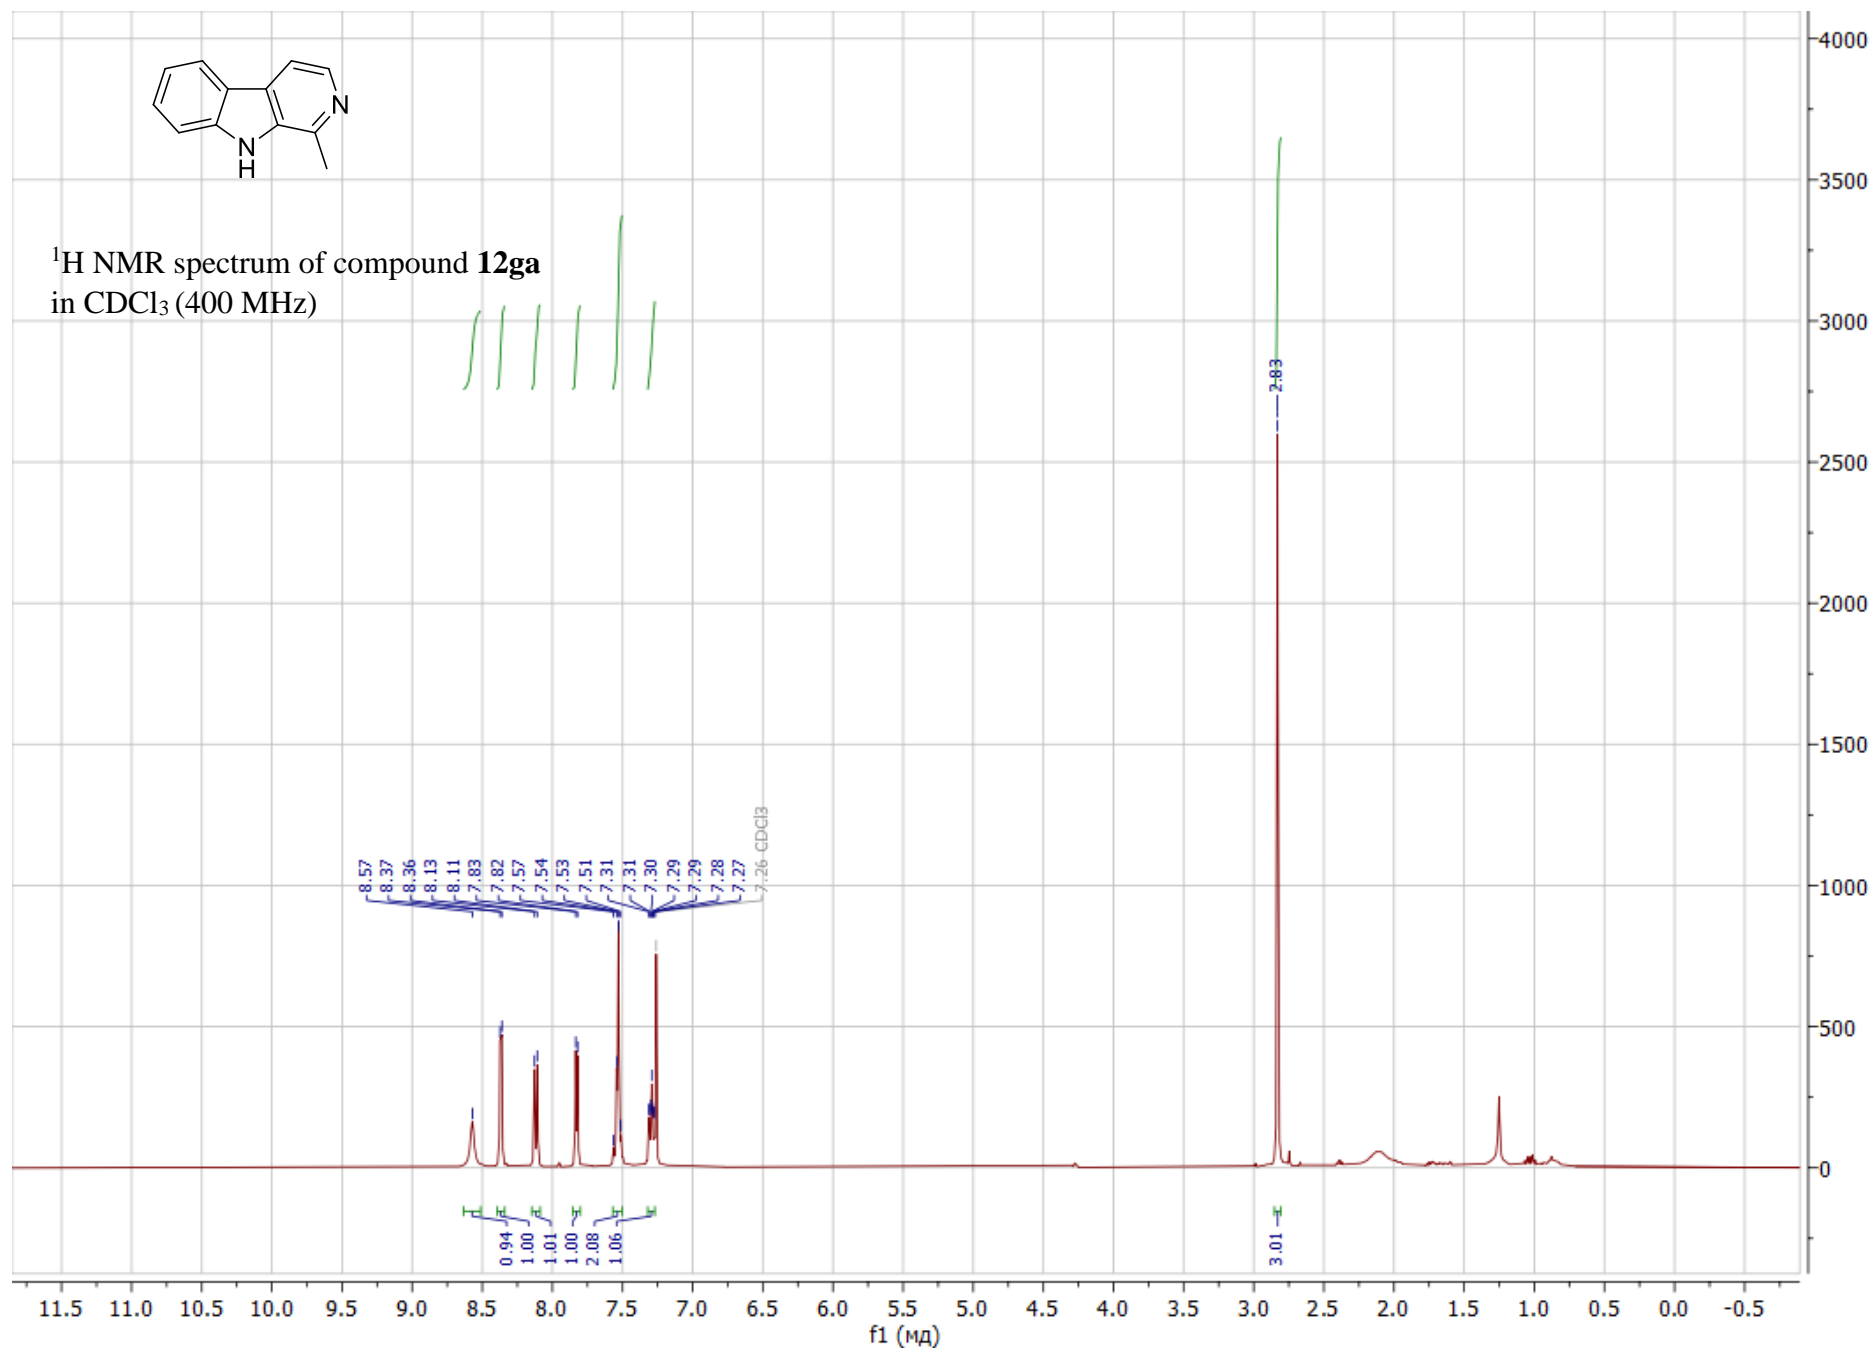

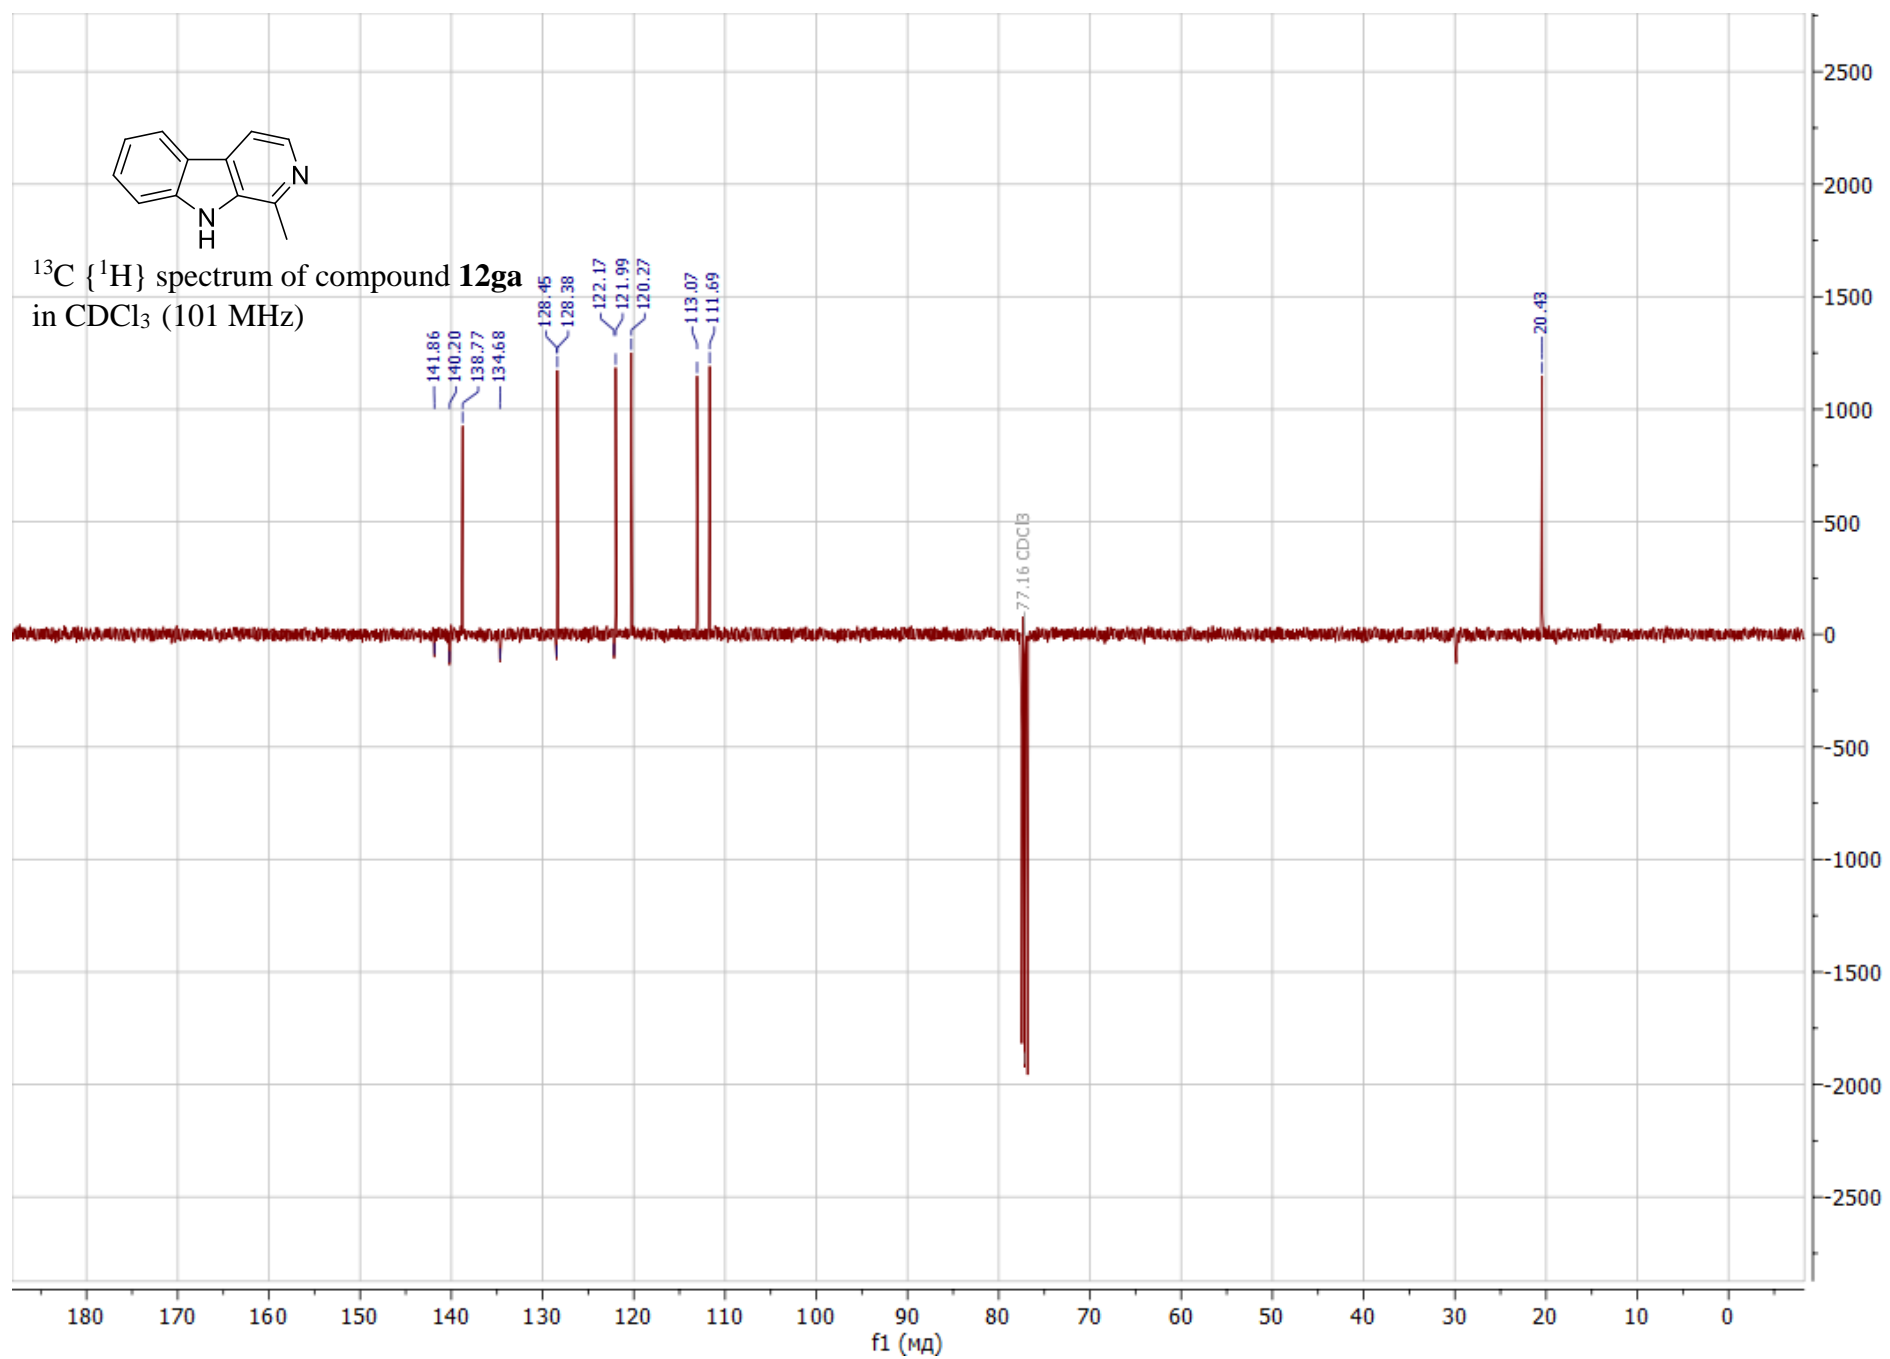

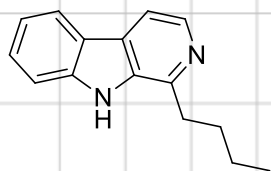

$^1\text{H}$  NMR spectrum of compound **12ha**  
in  $\text{CDCl}_3$  (400 MHz)

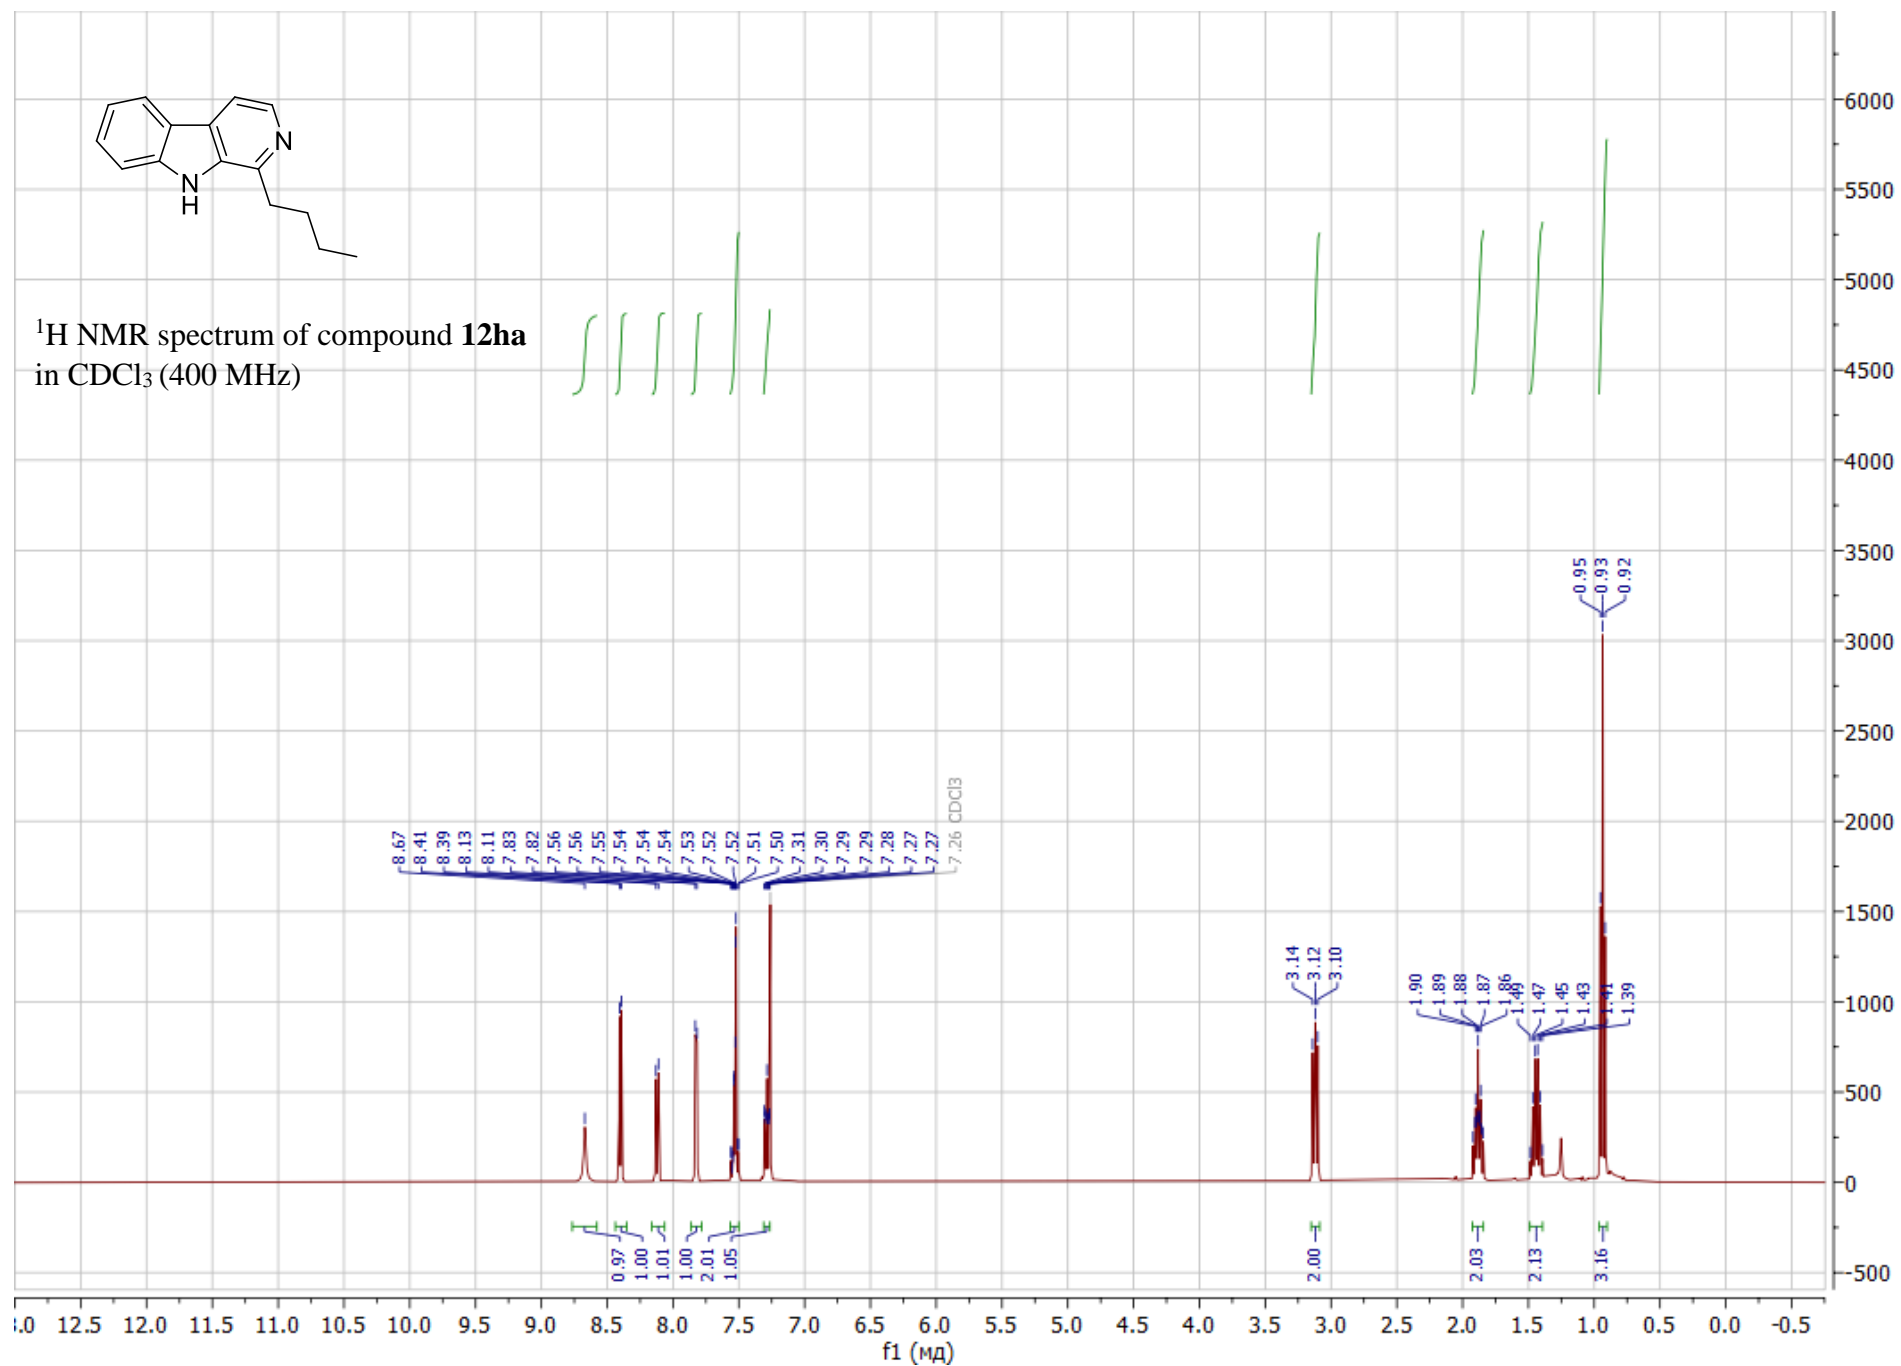

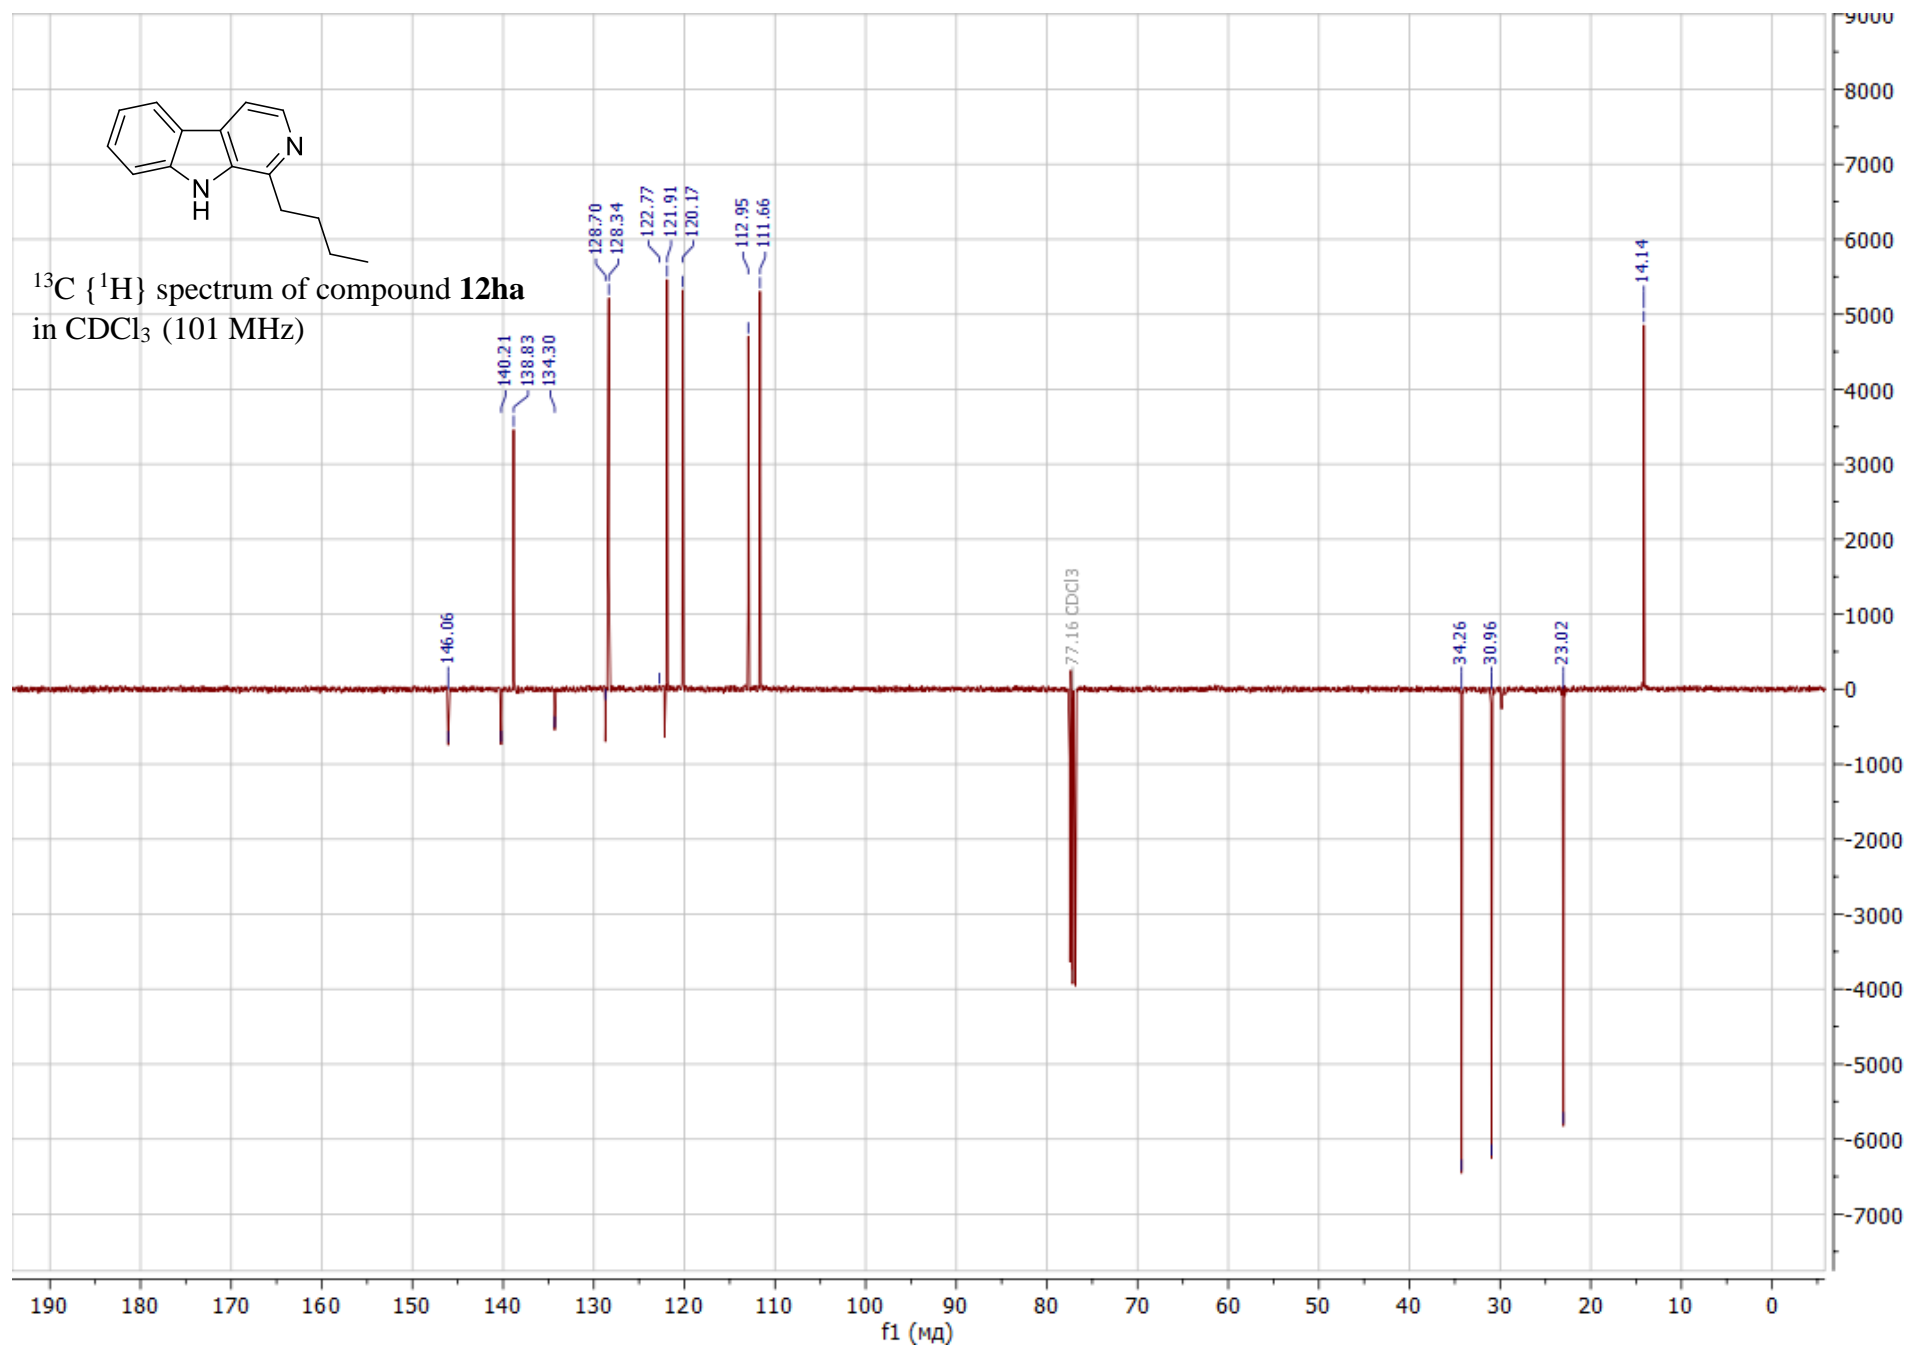

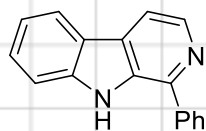

$^1\text{H}$  NMR spectrum of compound **12ia**  
in  $\text{DMSO-}d_6$  (400 MHz)

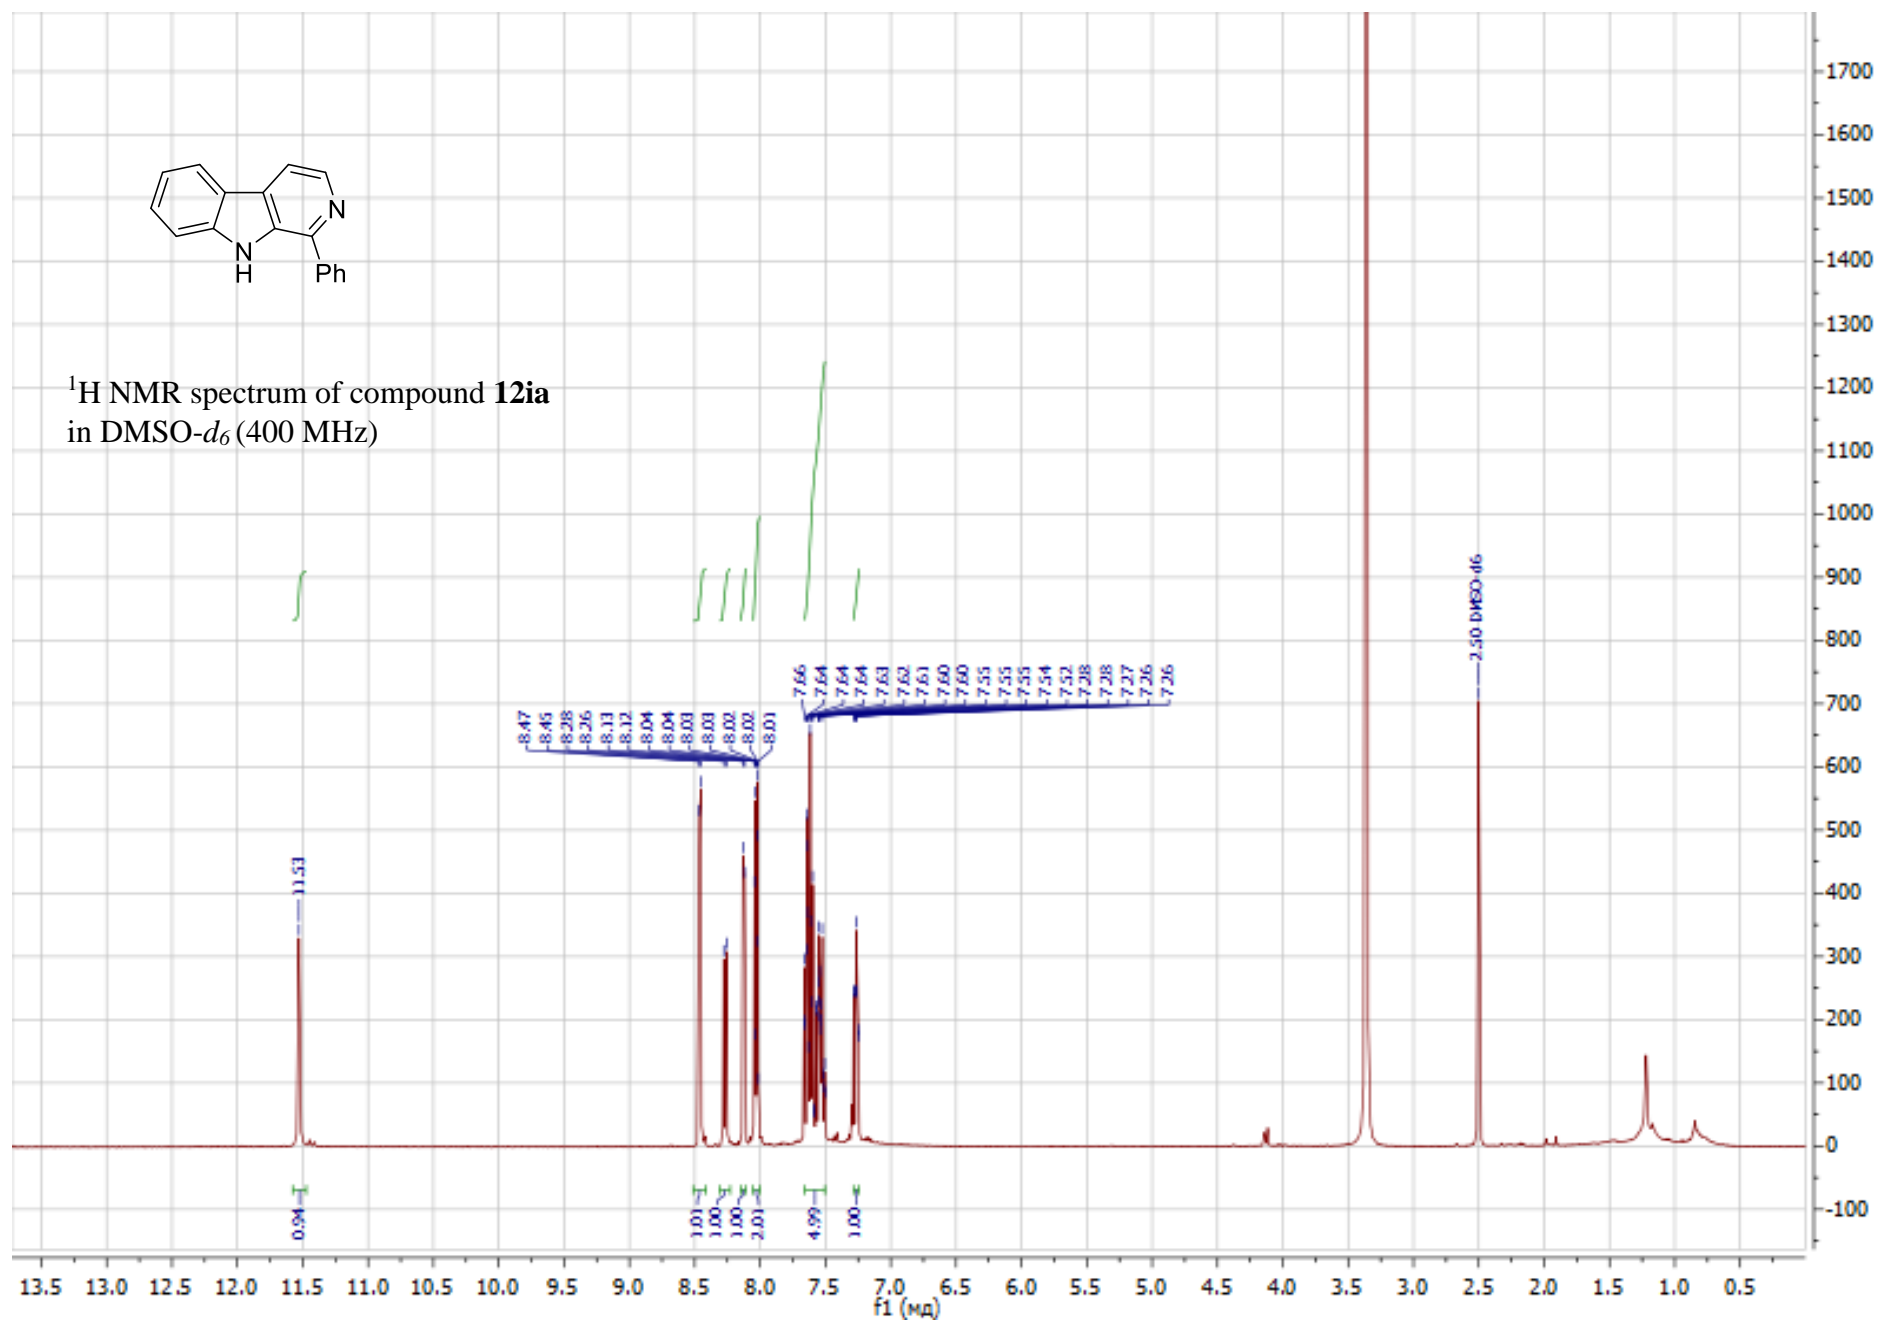

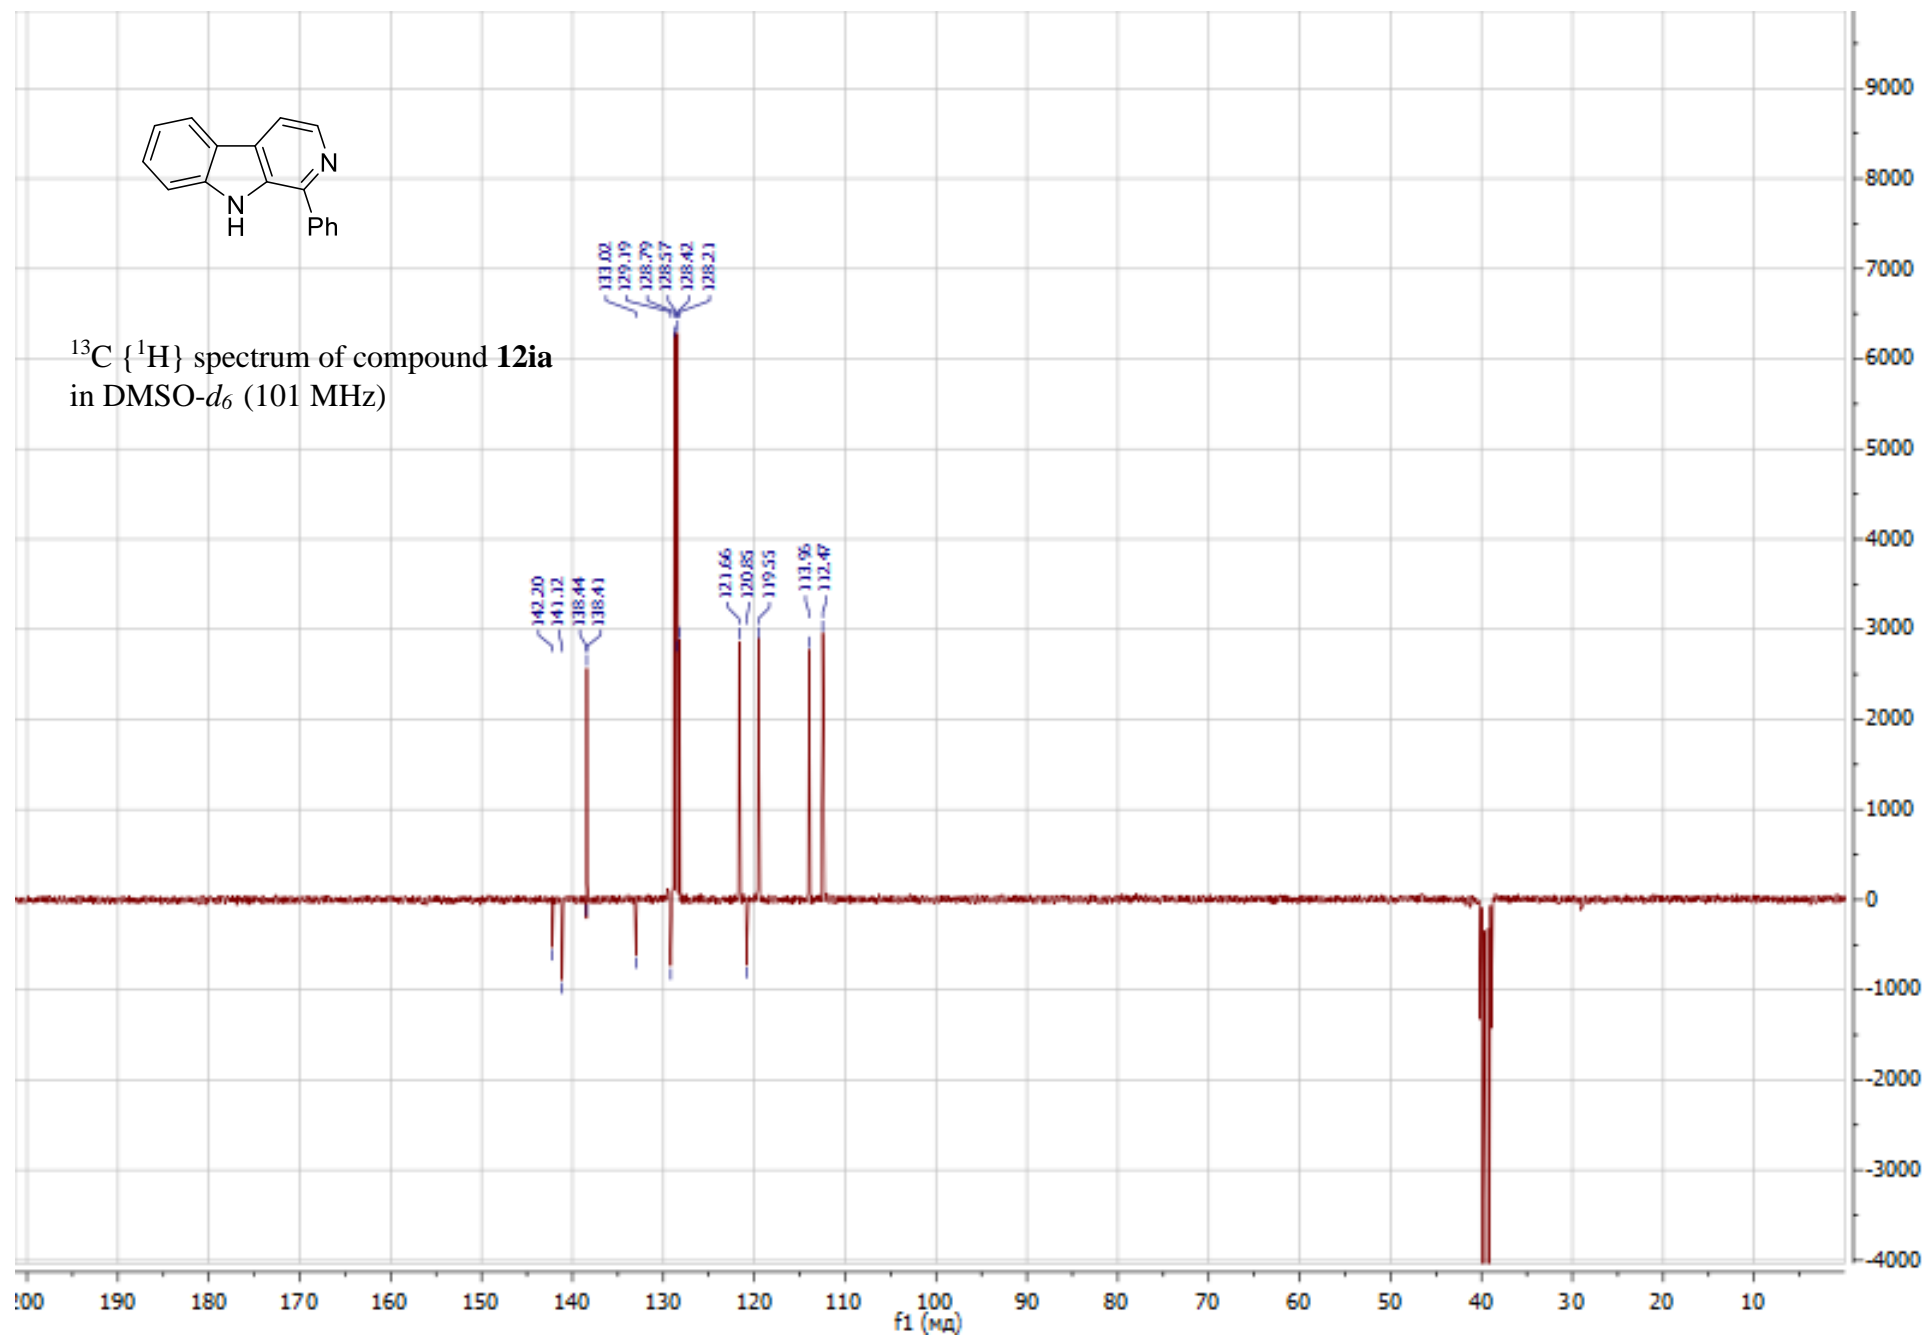



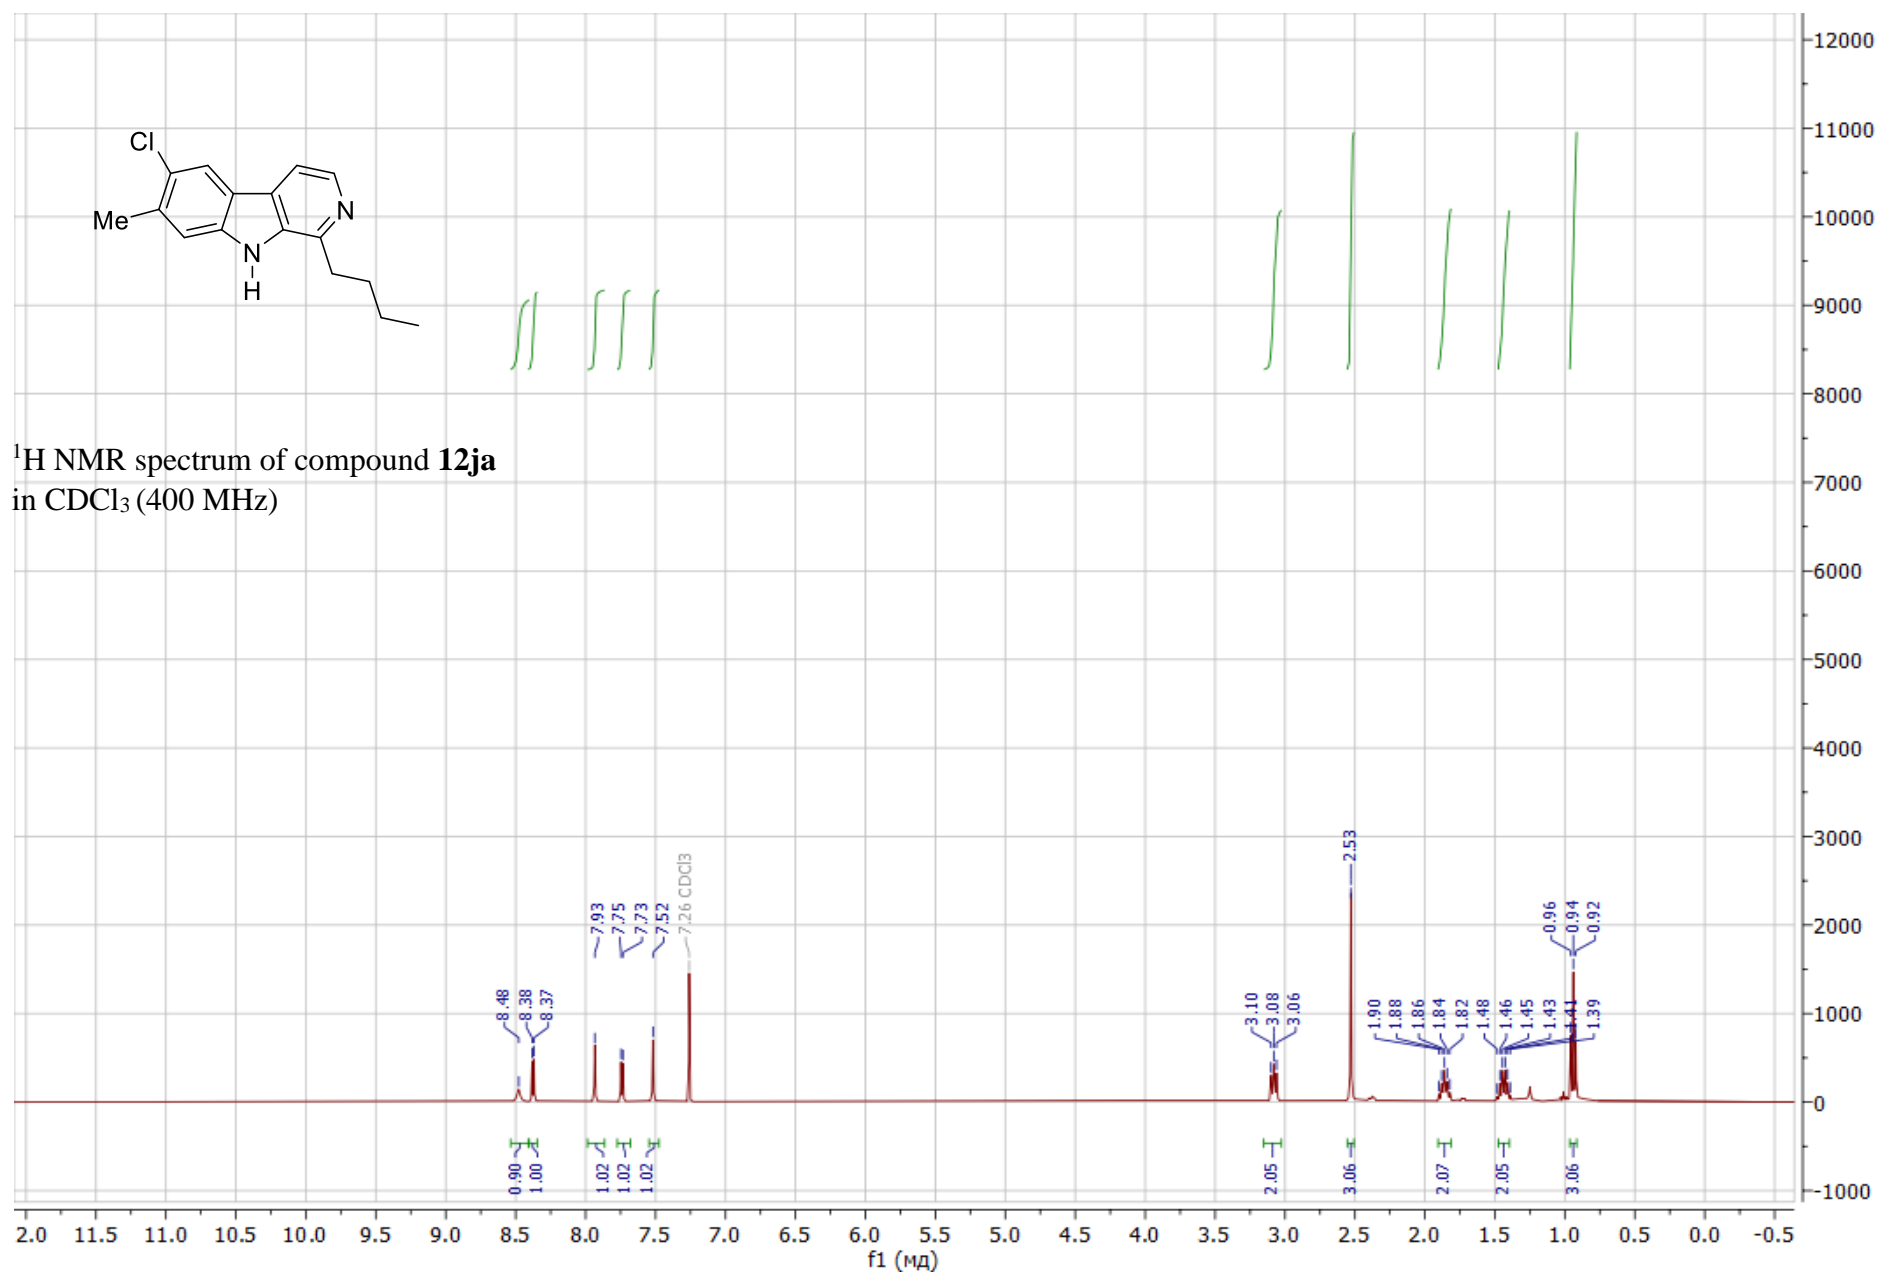

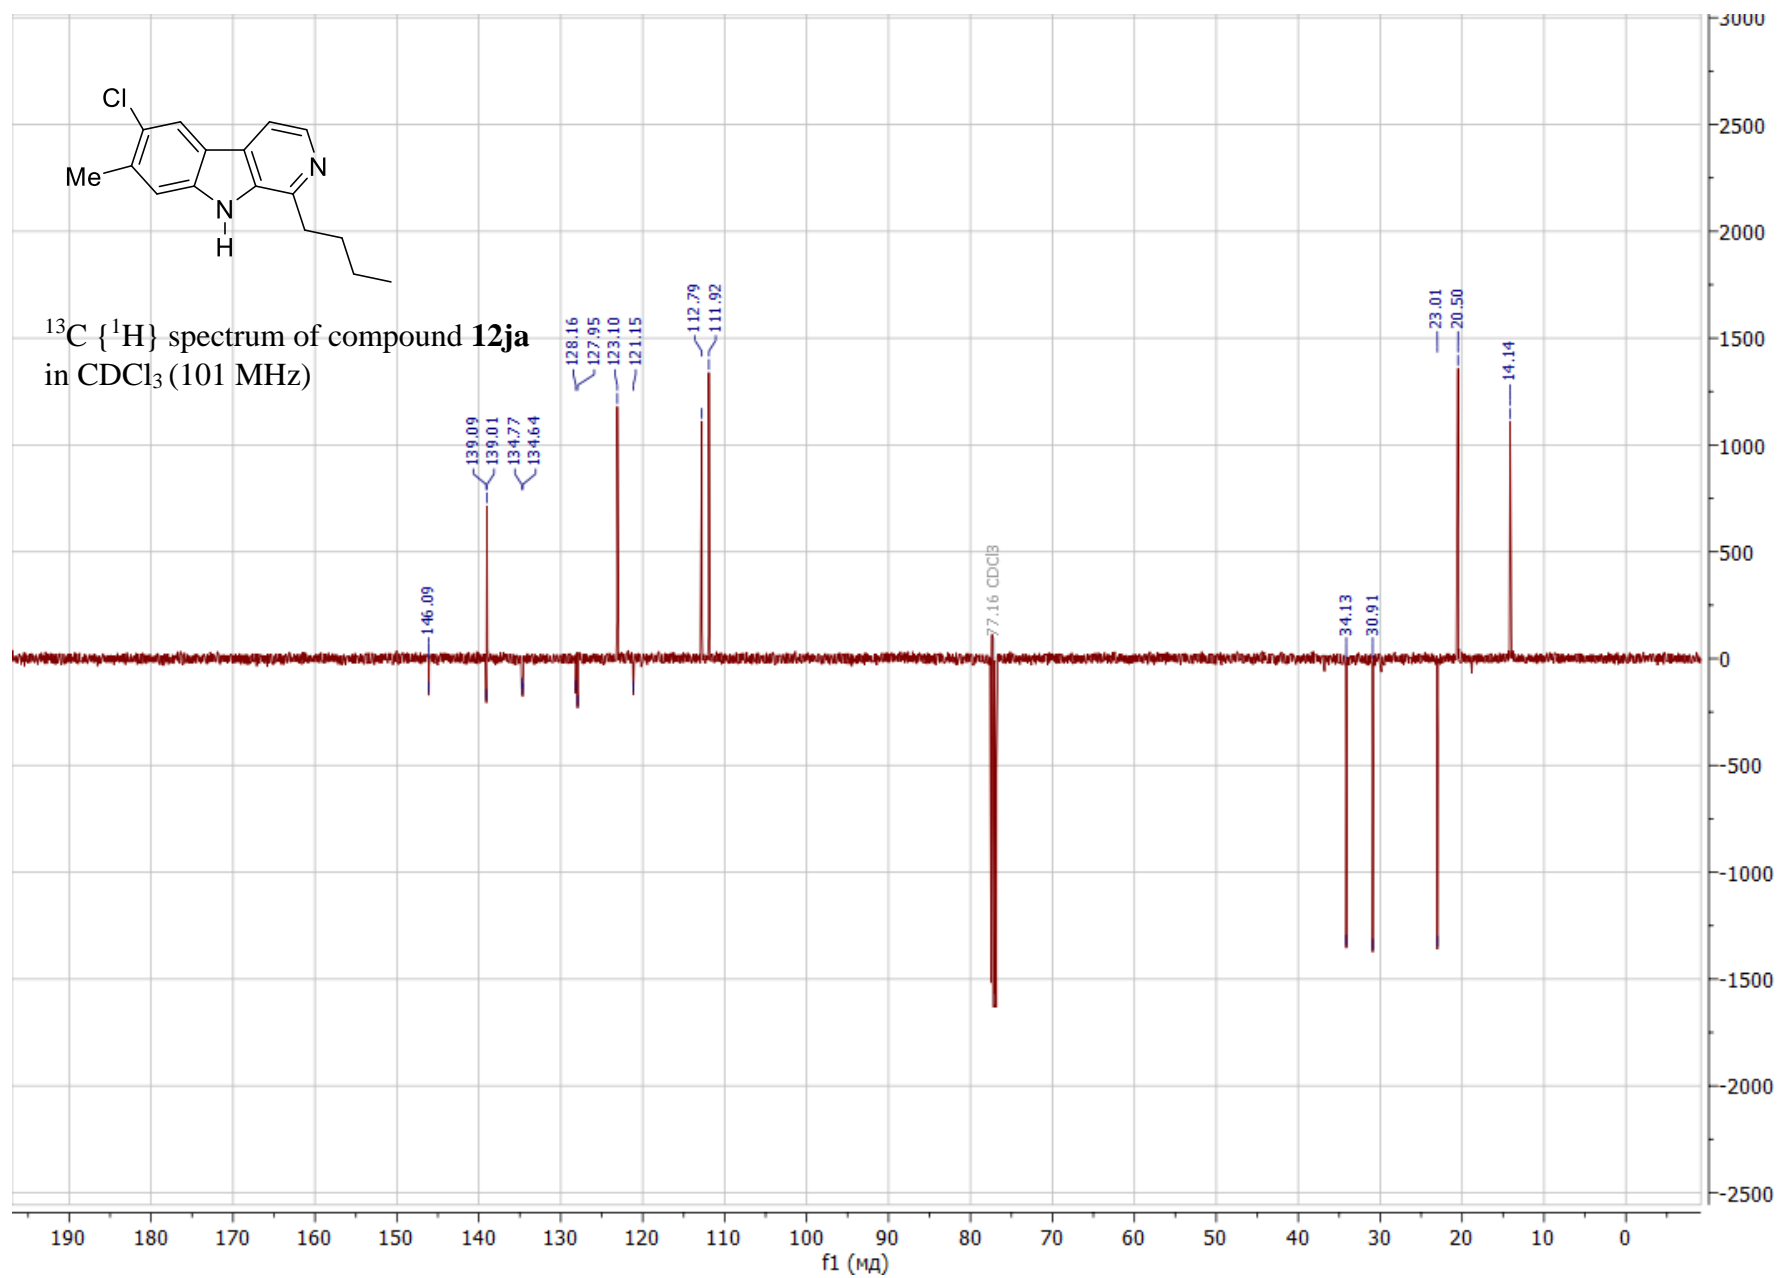

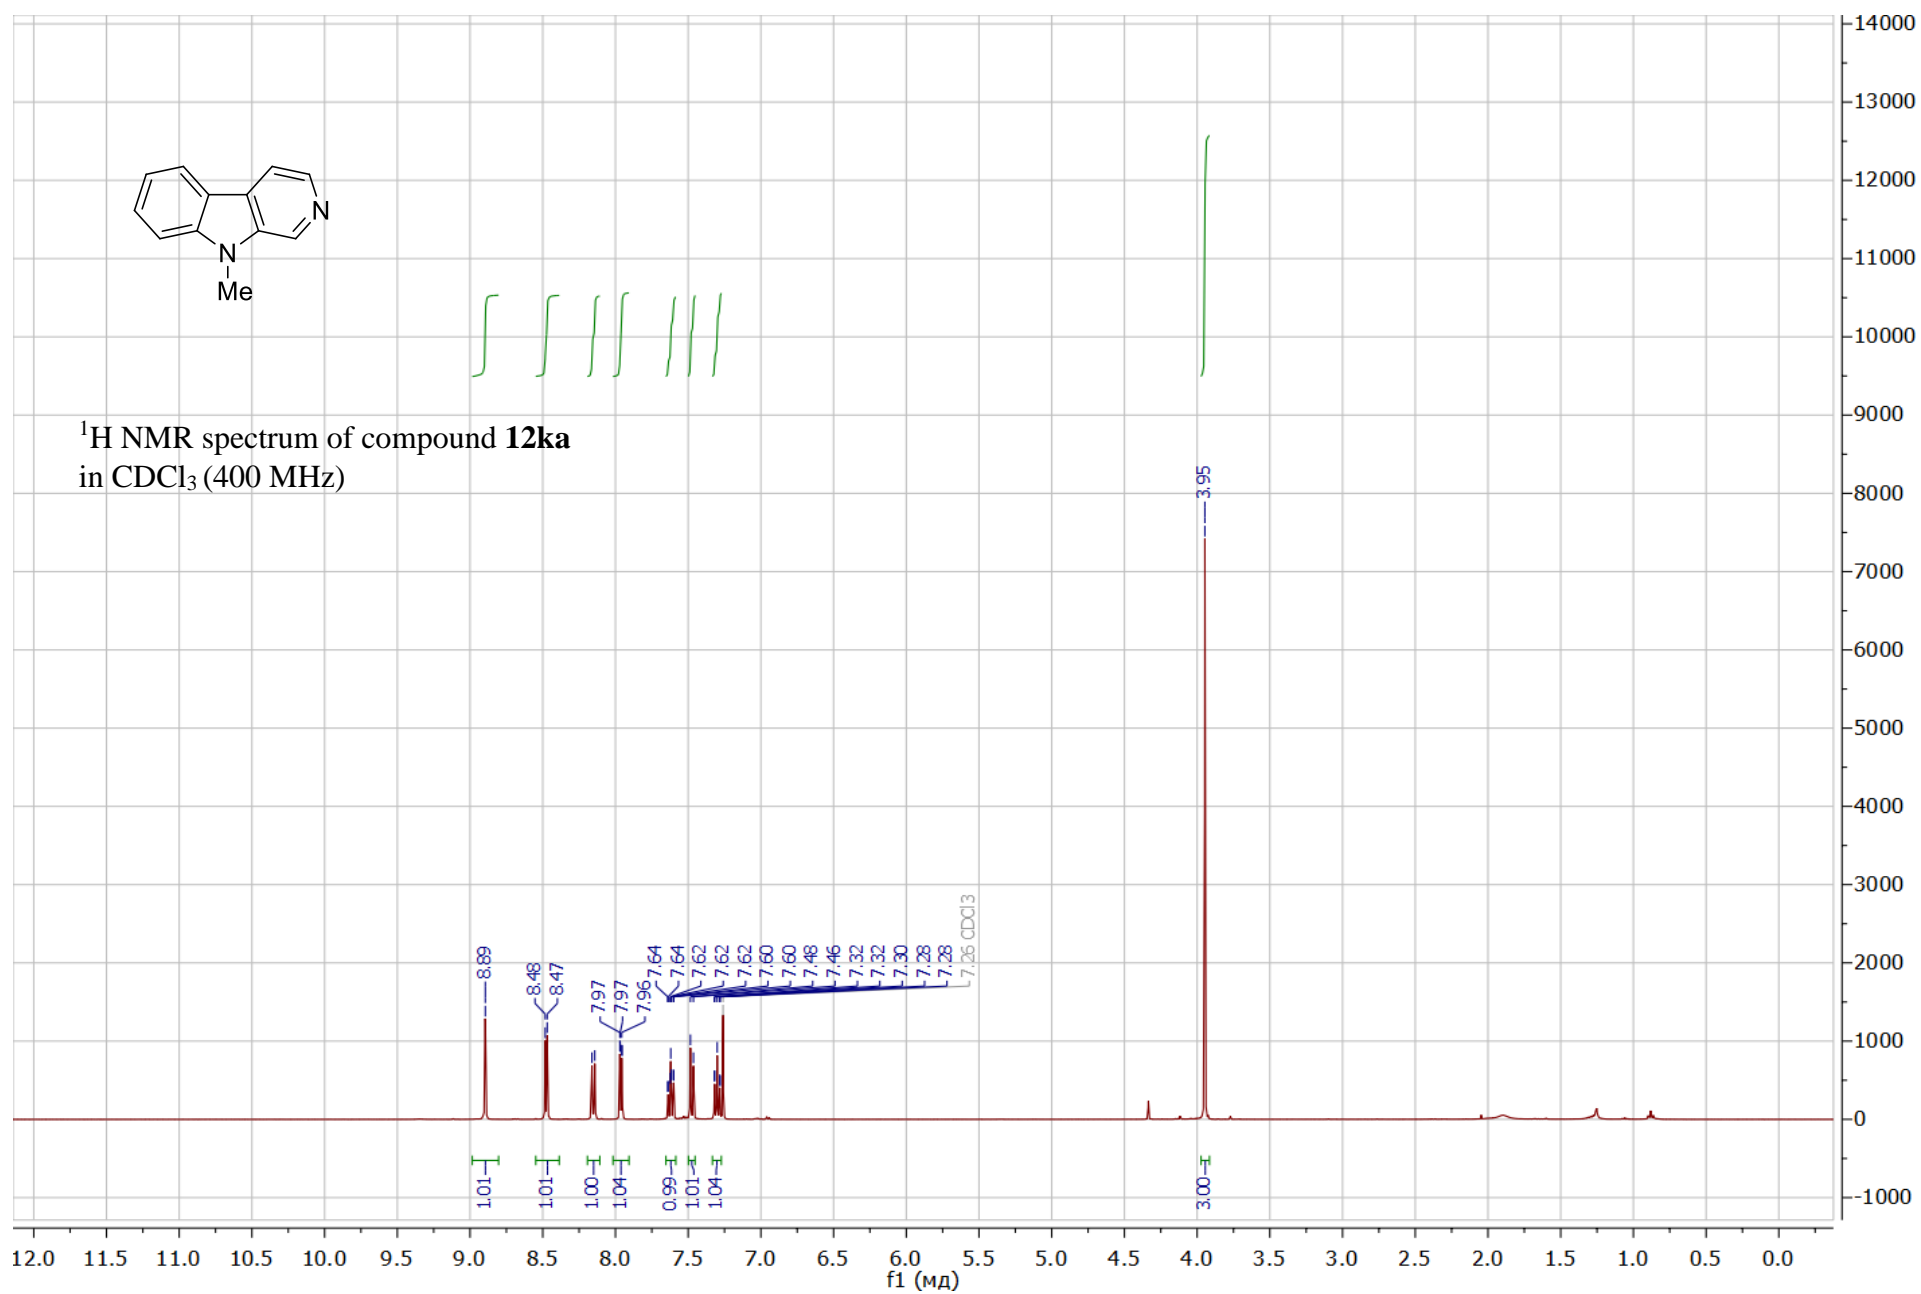

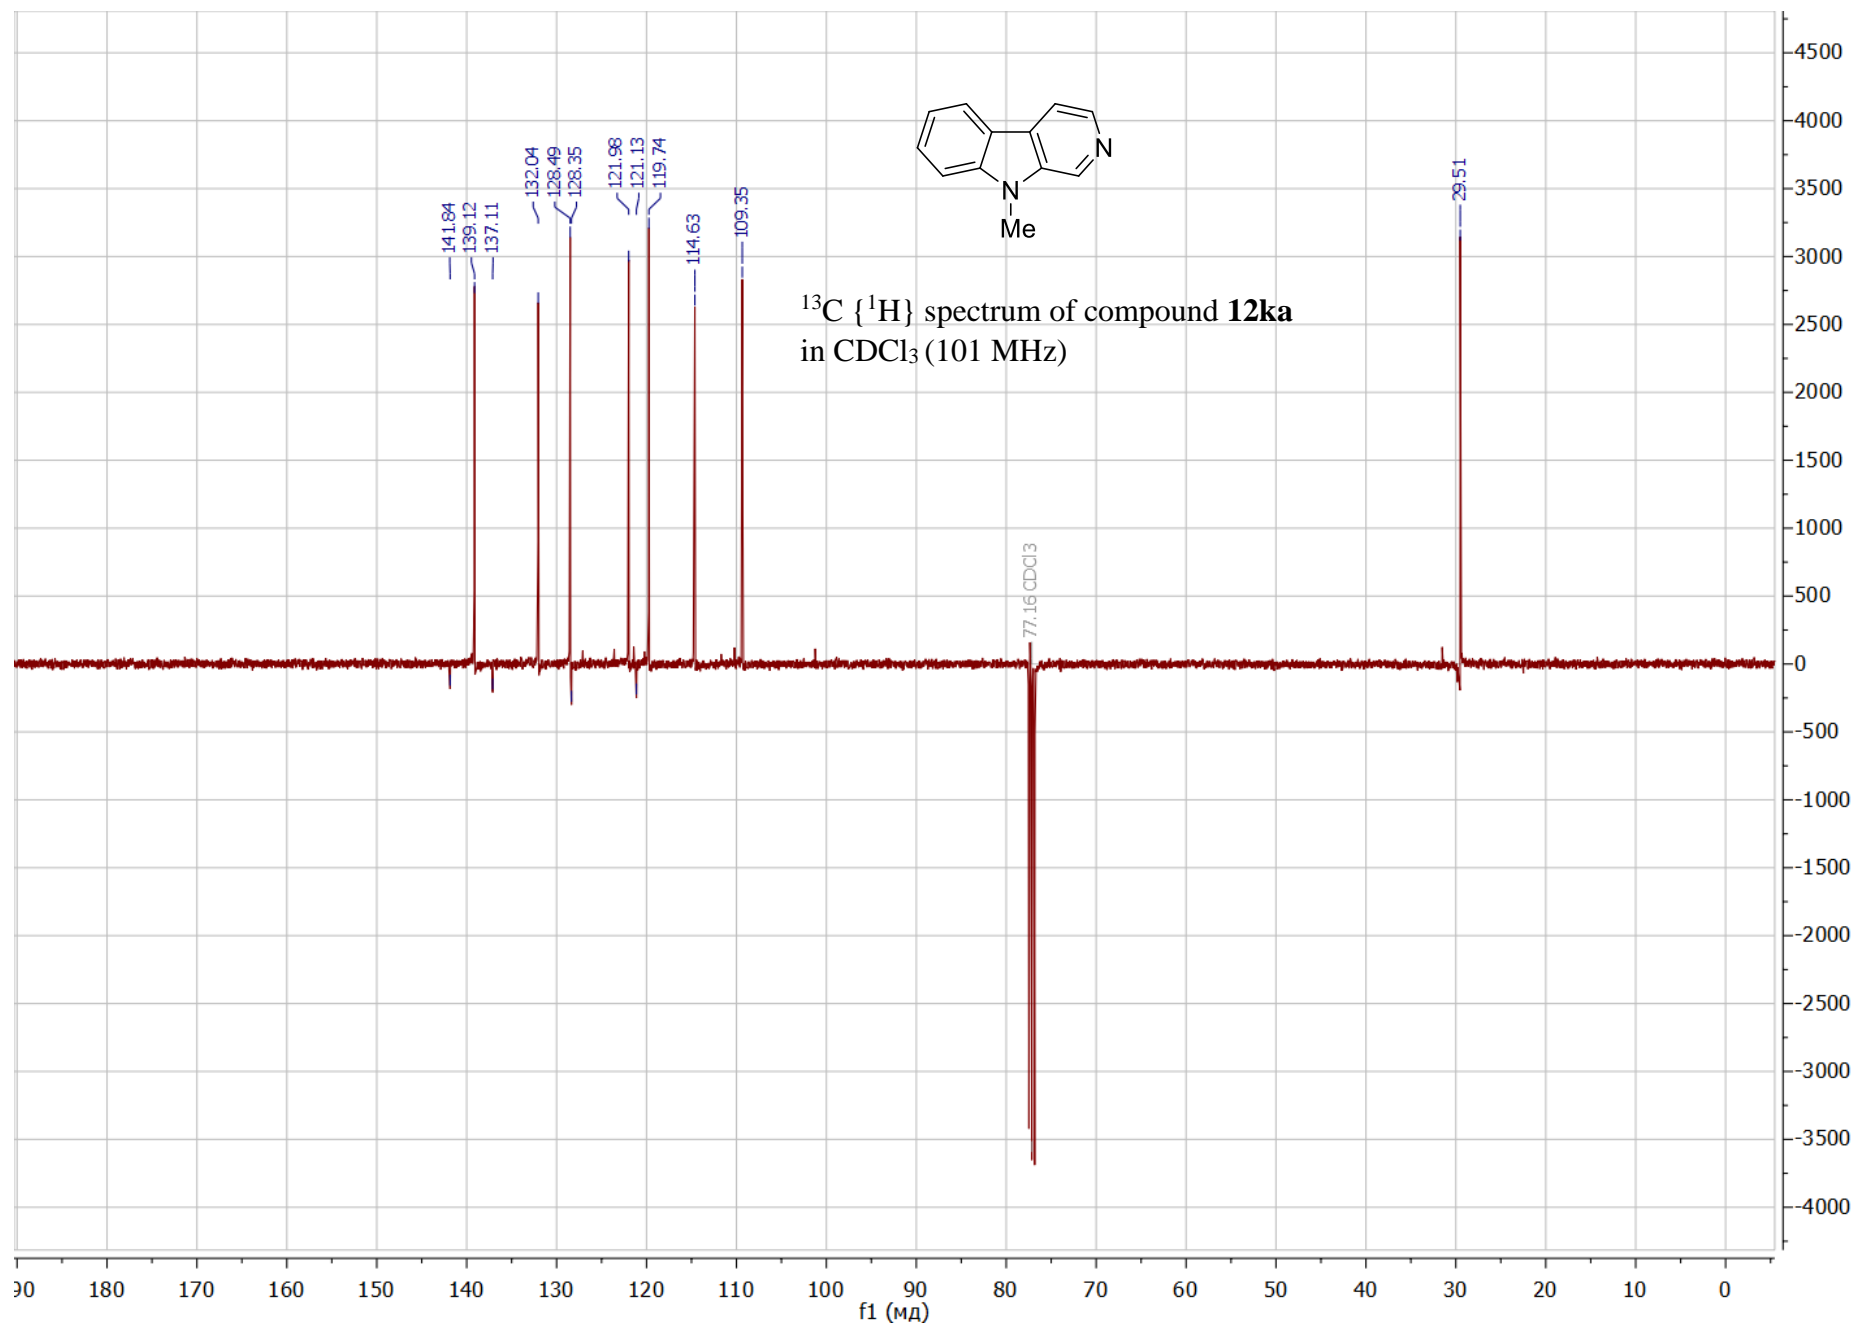

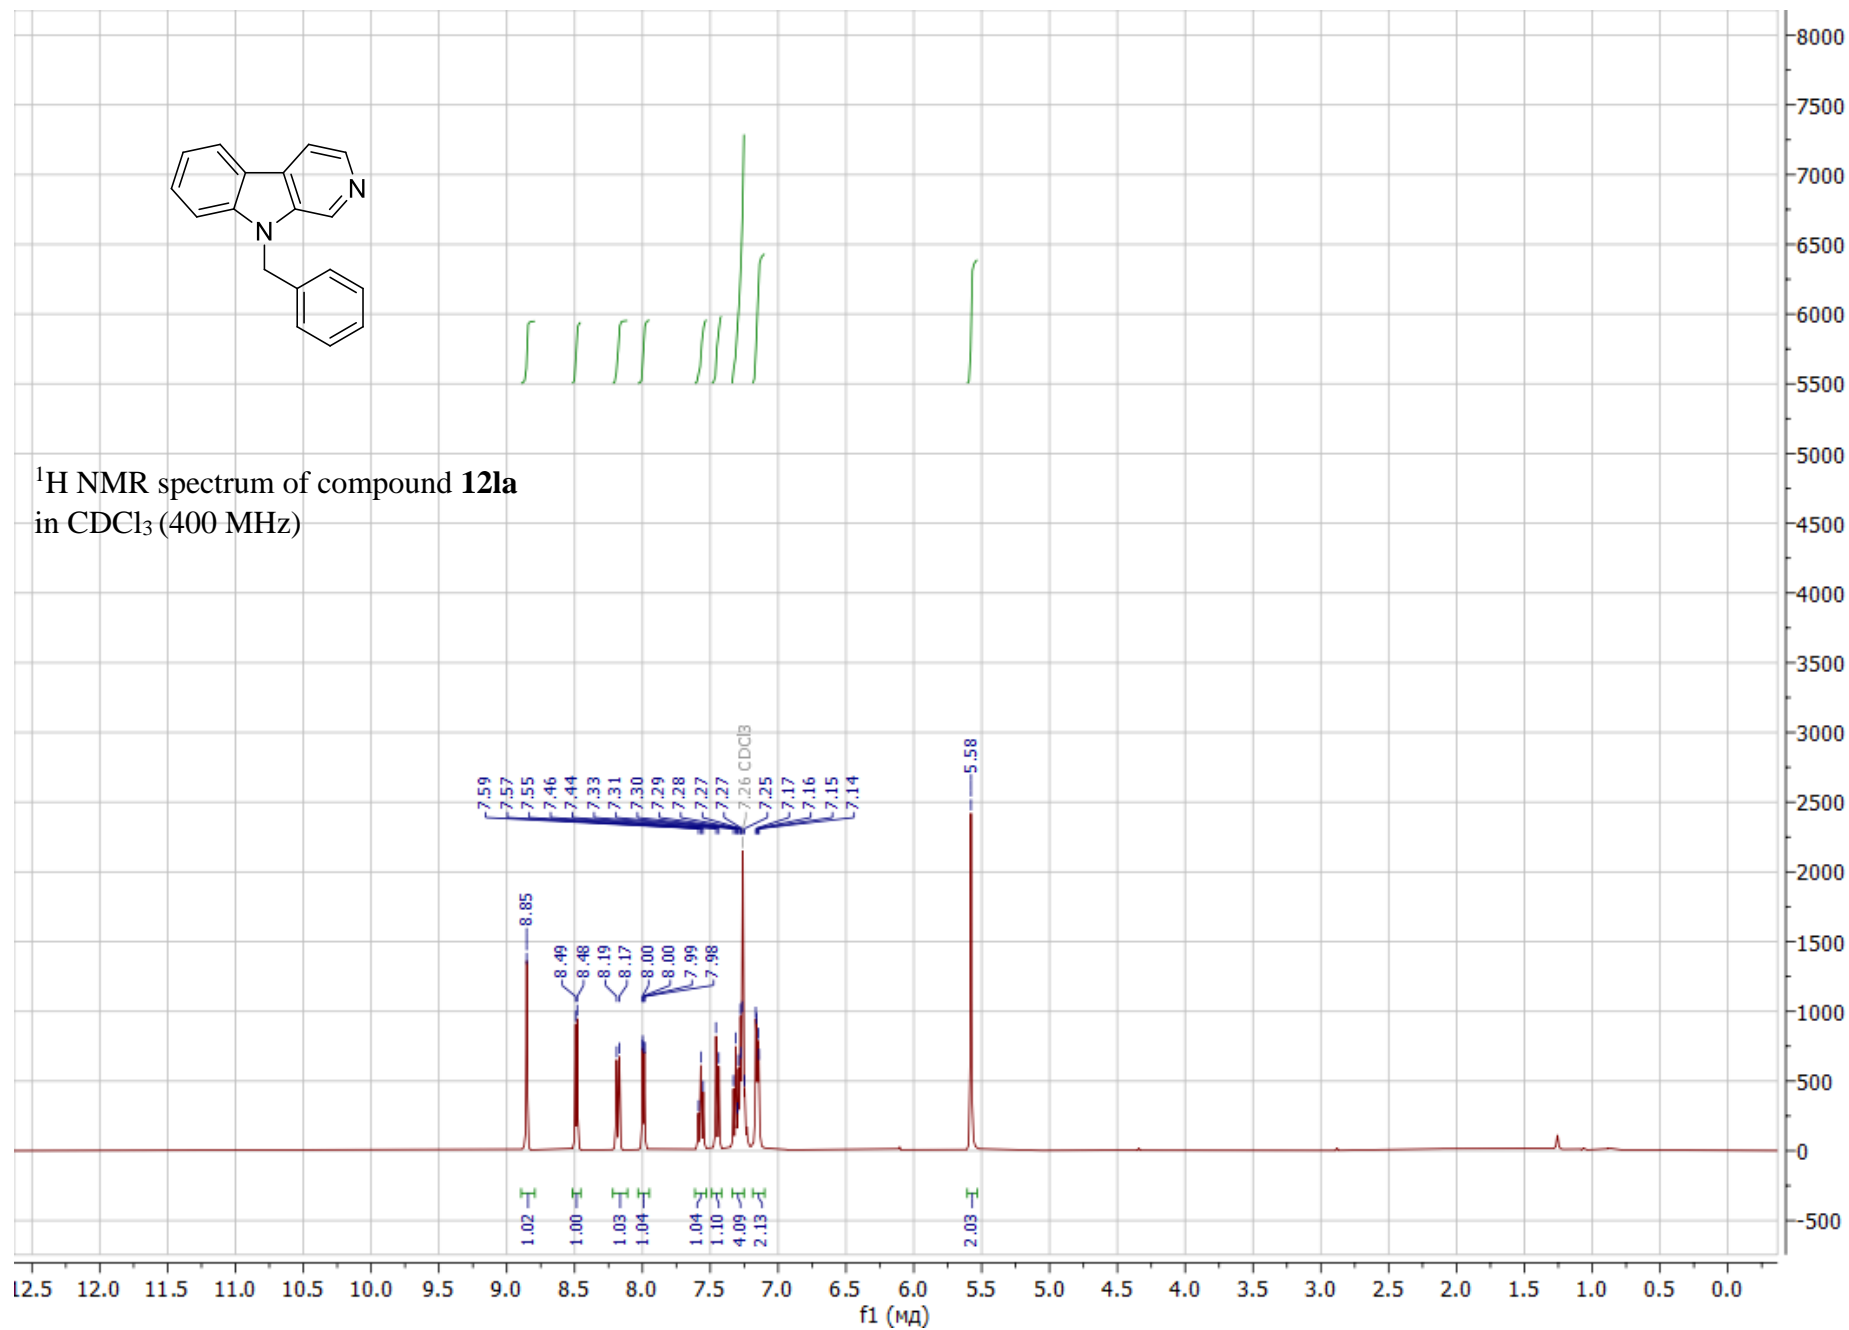

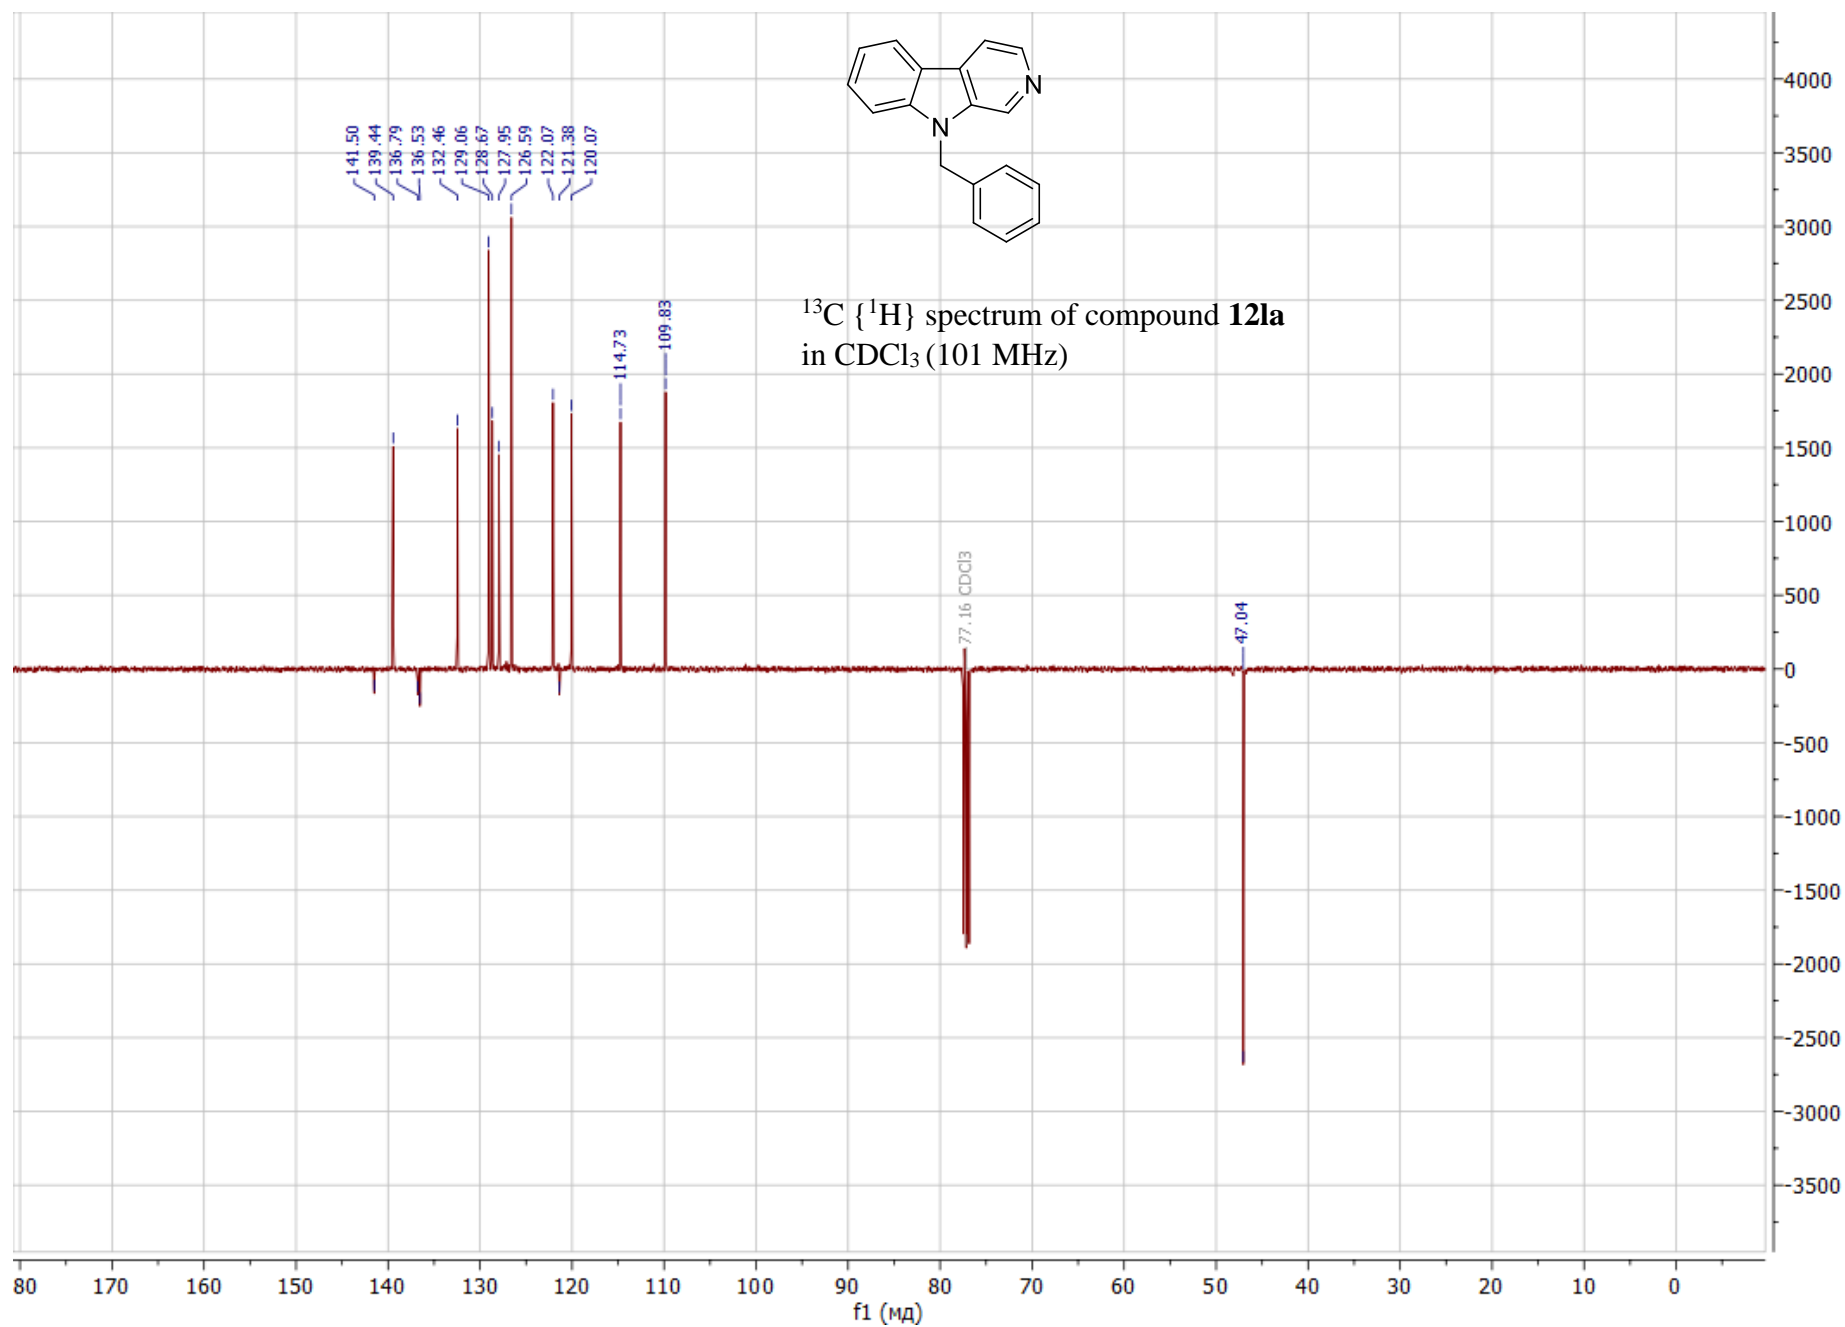

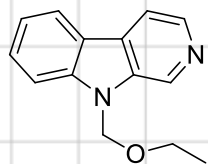

$^1\text{H}$  NMR spectrum of compound **12ma**  
in  $\text{CDCl}_3$  (400 MHz)

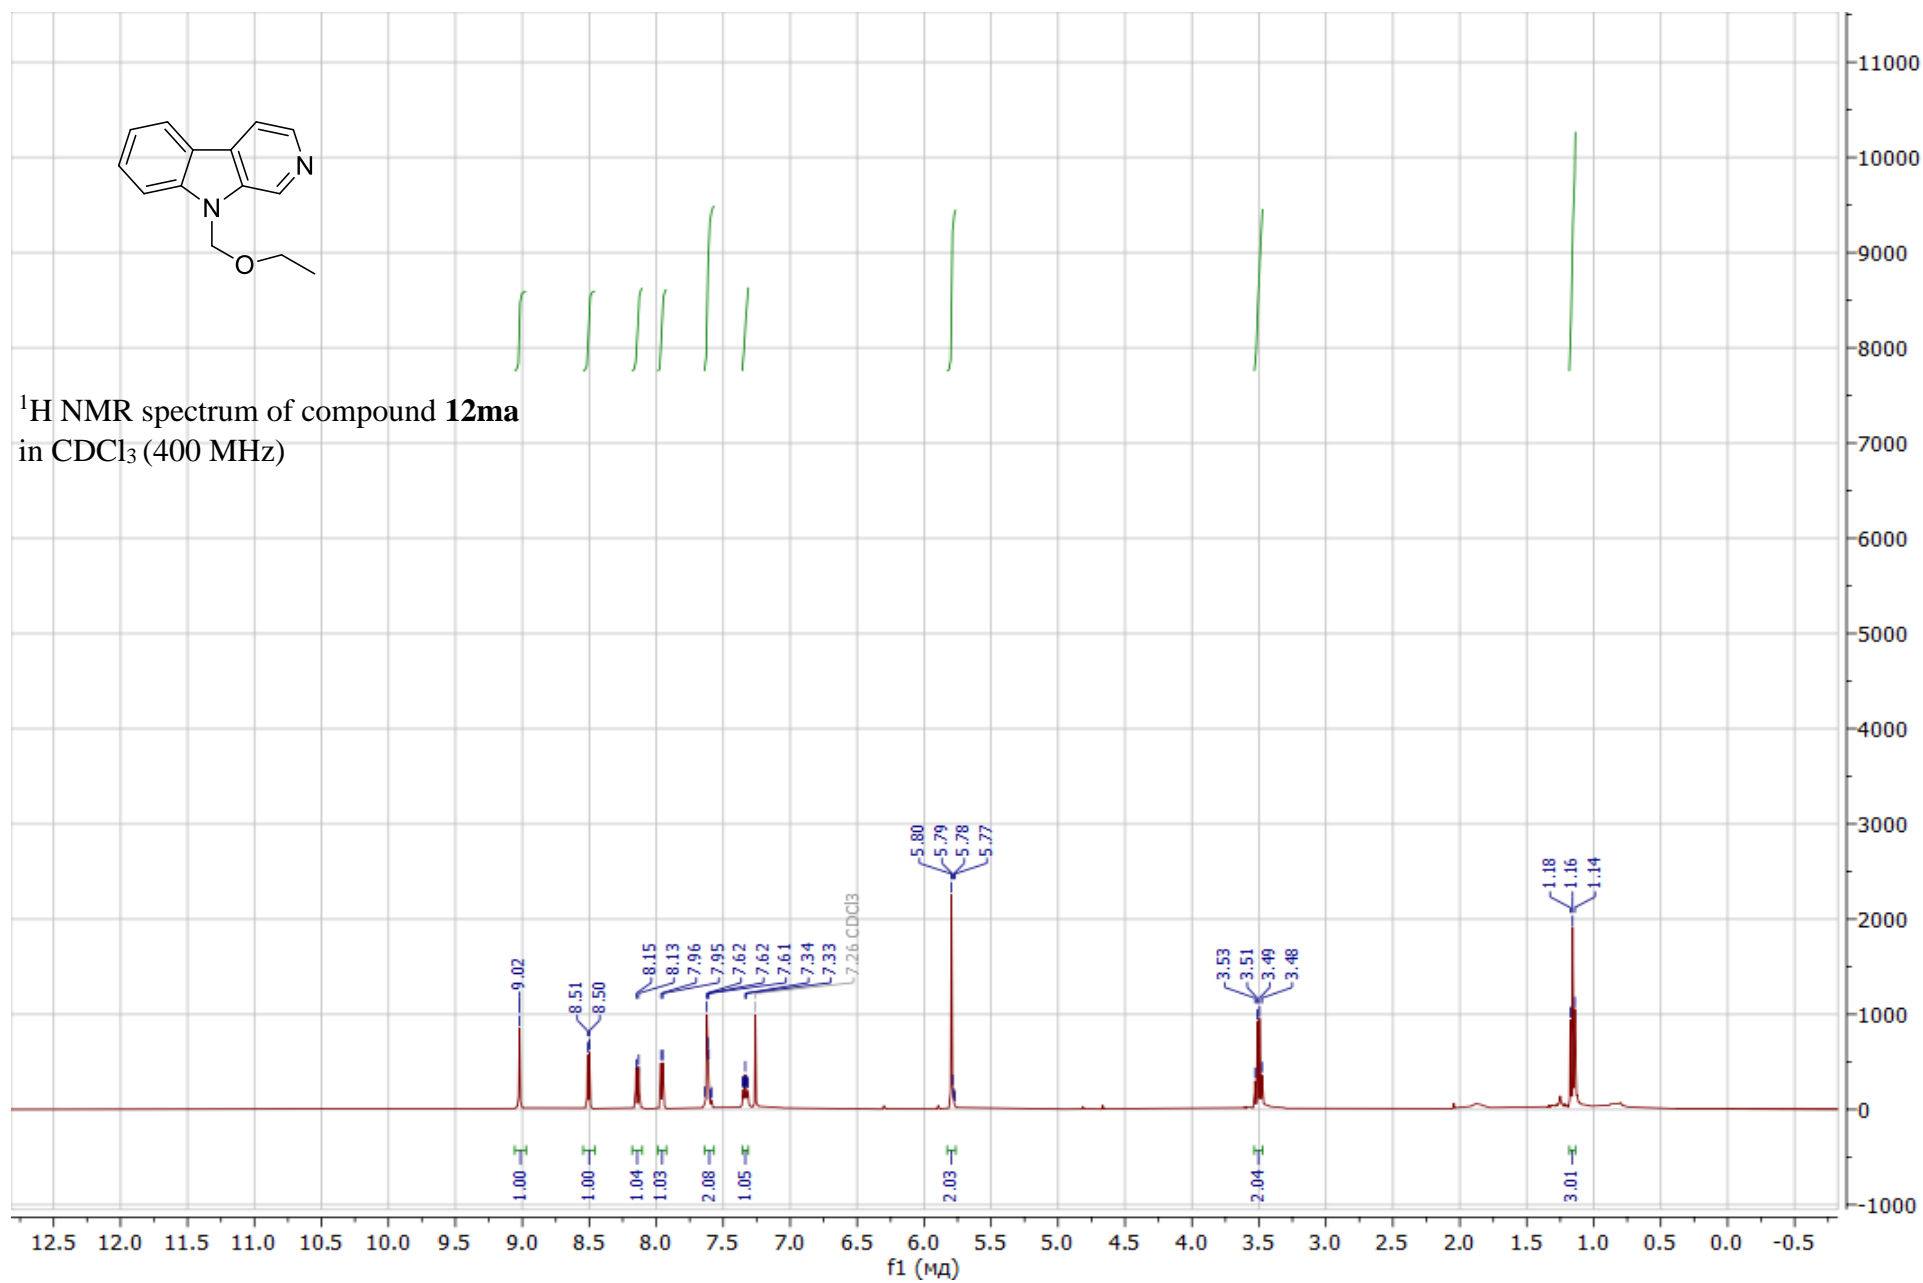

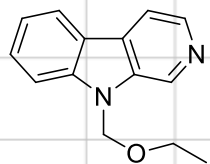

$^{13}\text{C}$  { $^1\text{H}$ } spectrum of compound **12ma**  
in  $\text{CDCl}_3$  (101 MHz)

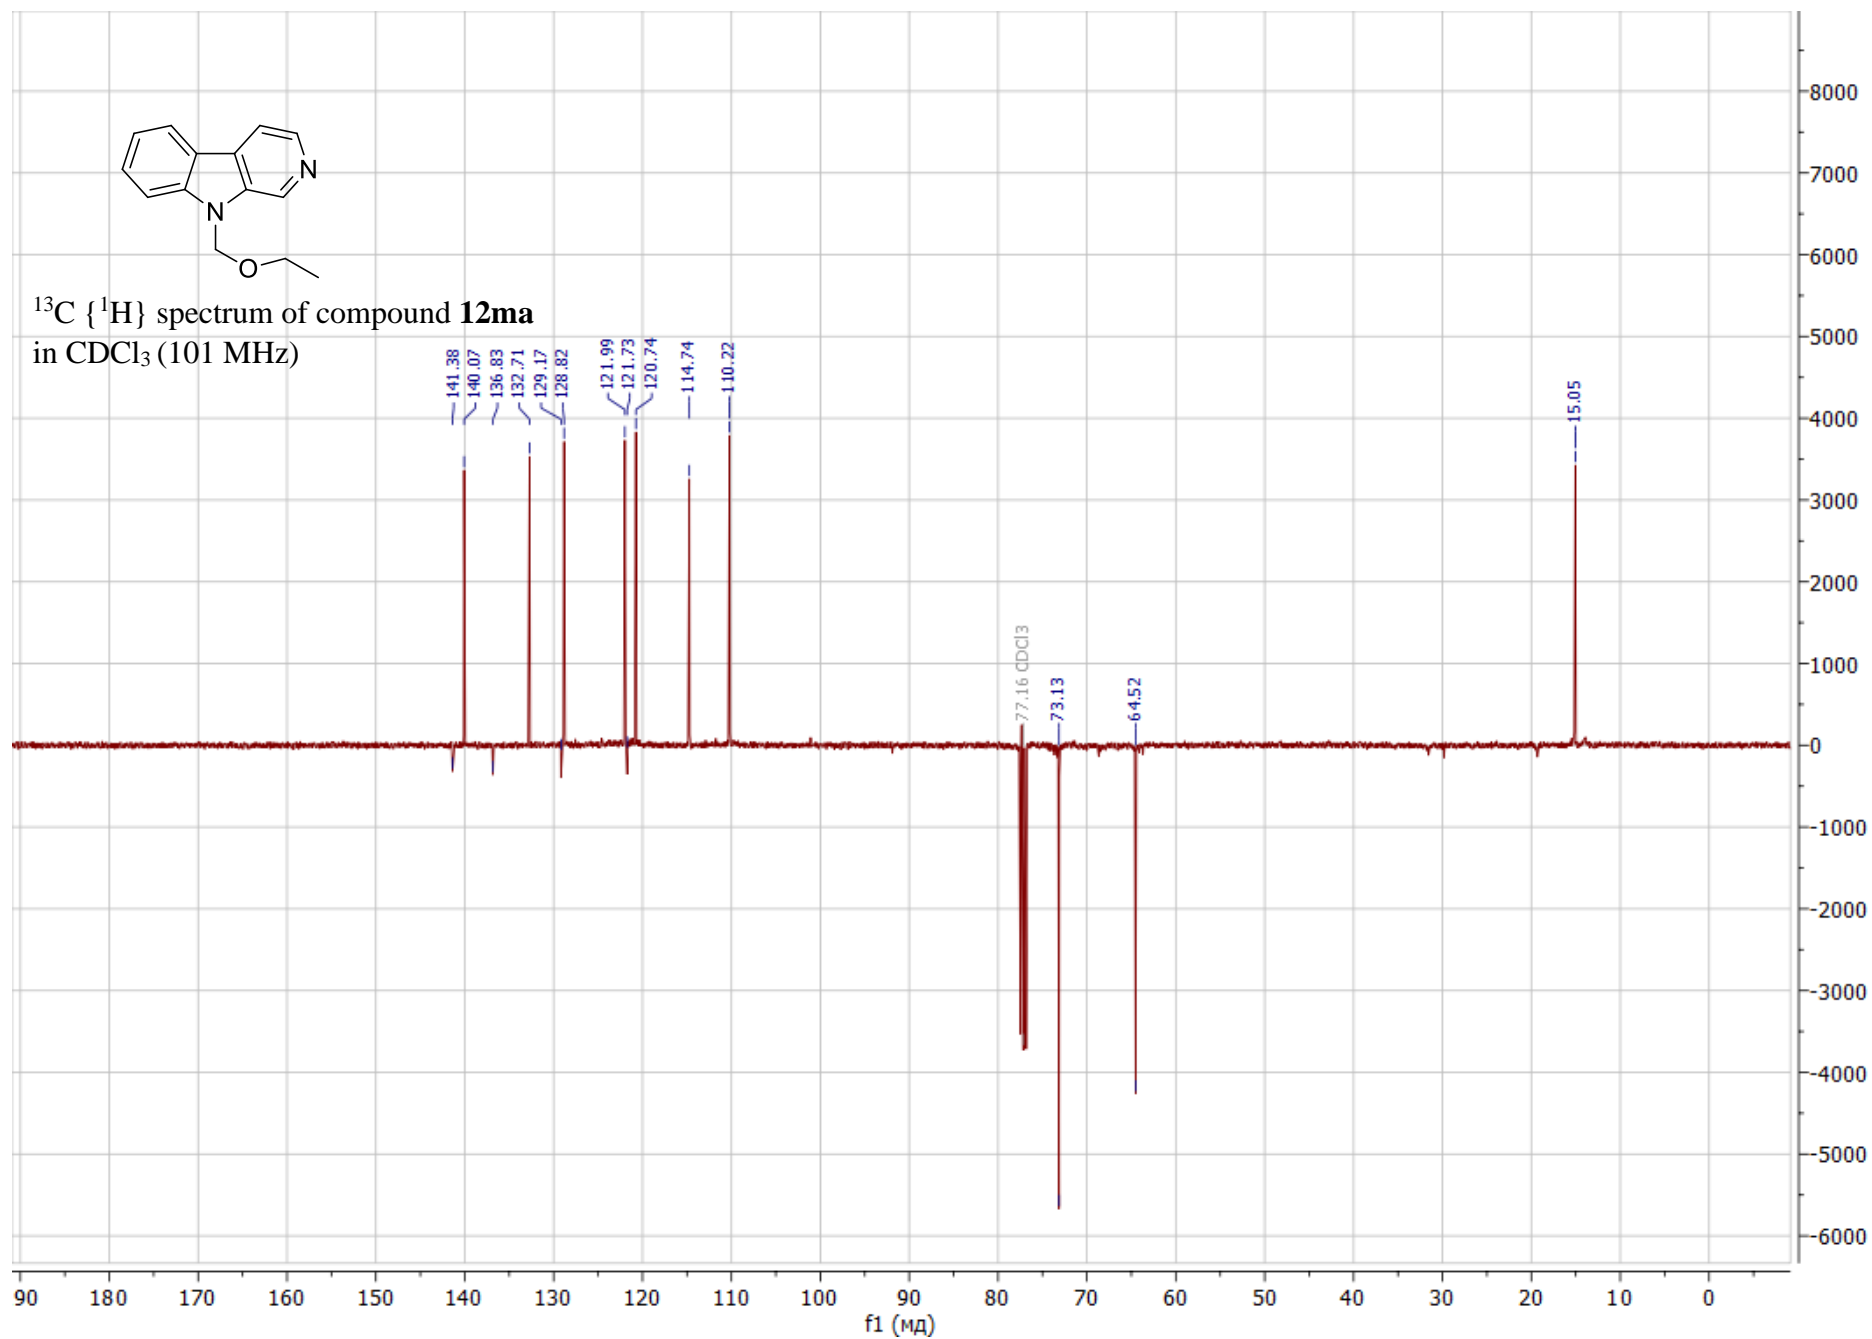



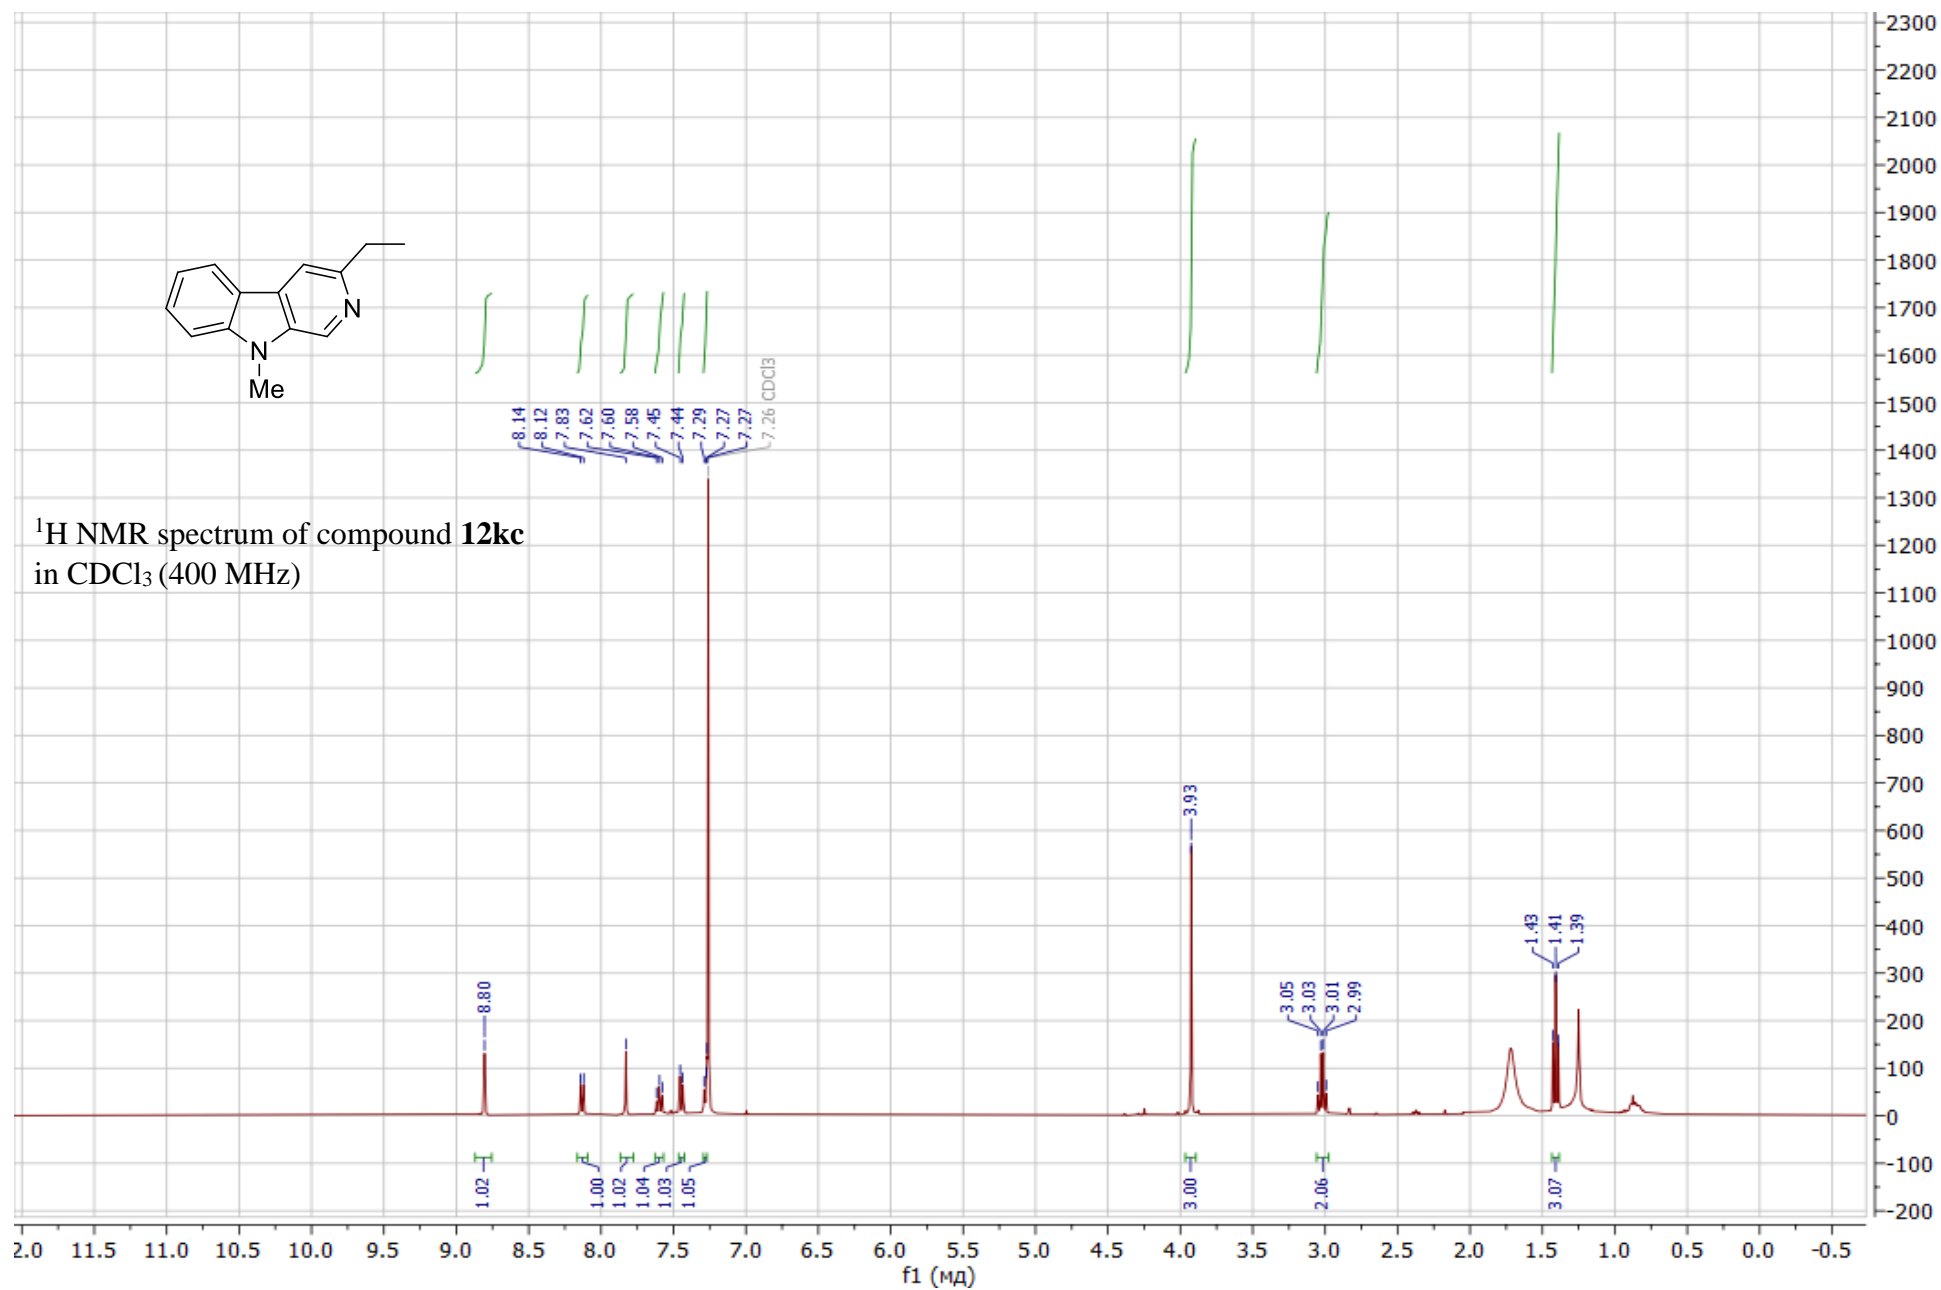

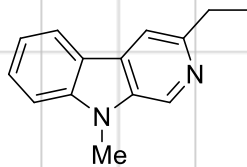

$^{13}\text{C}$  spectrum of compound **12kc**  
in  $\text{CDCl}_3$  (101 MHz)

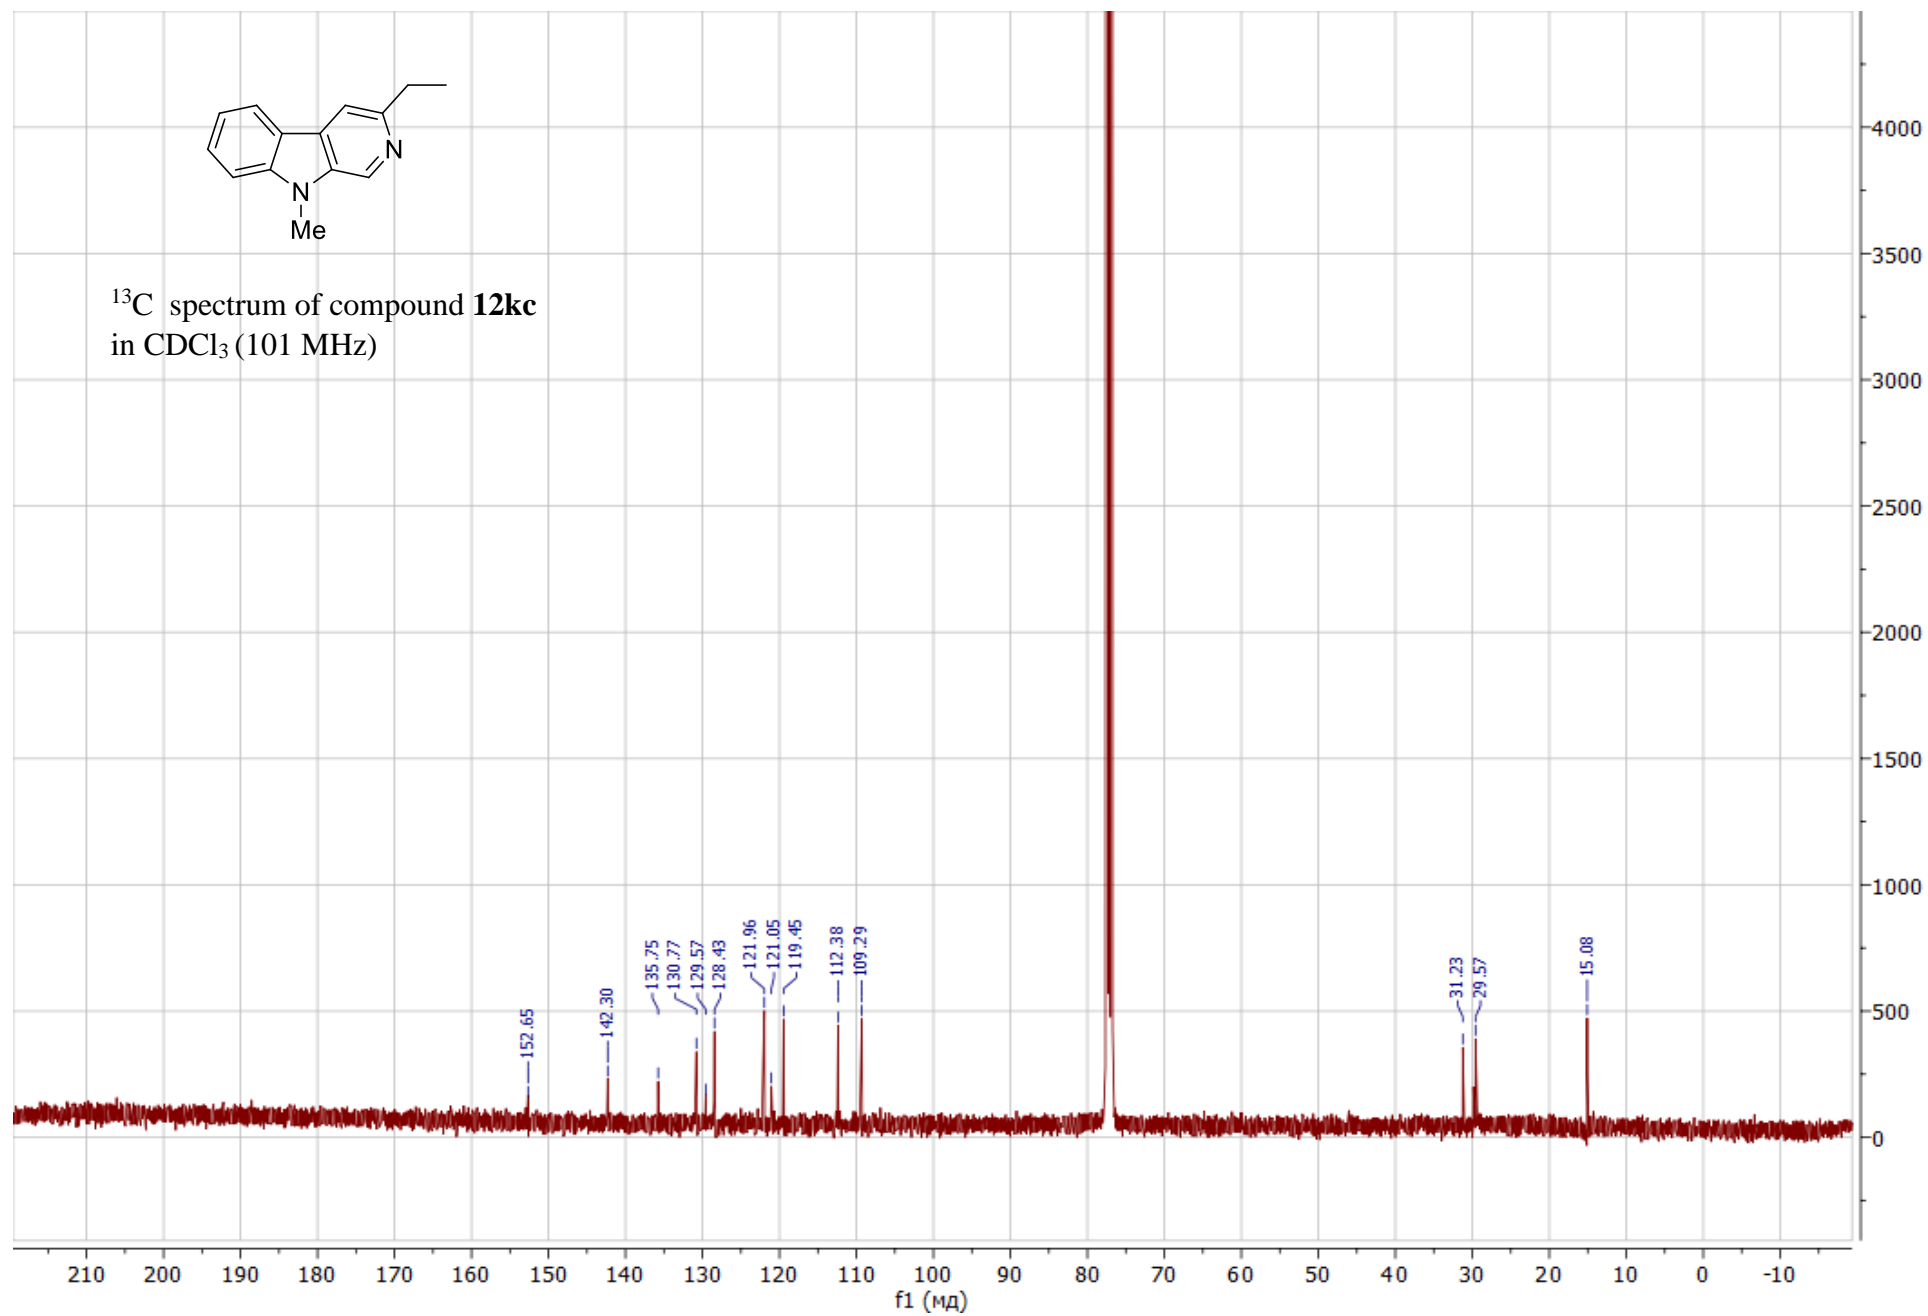

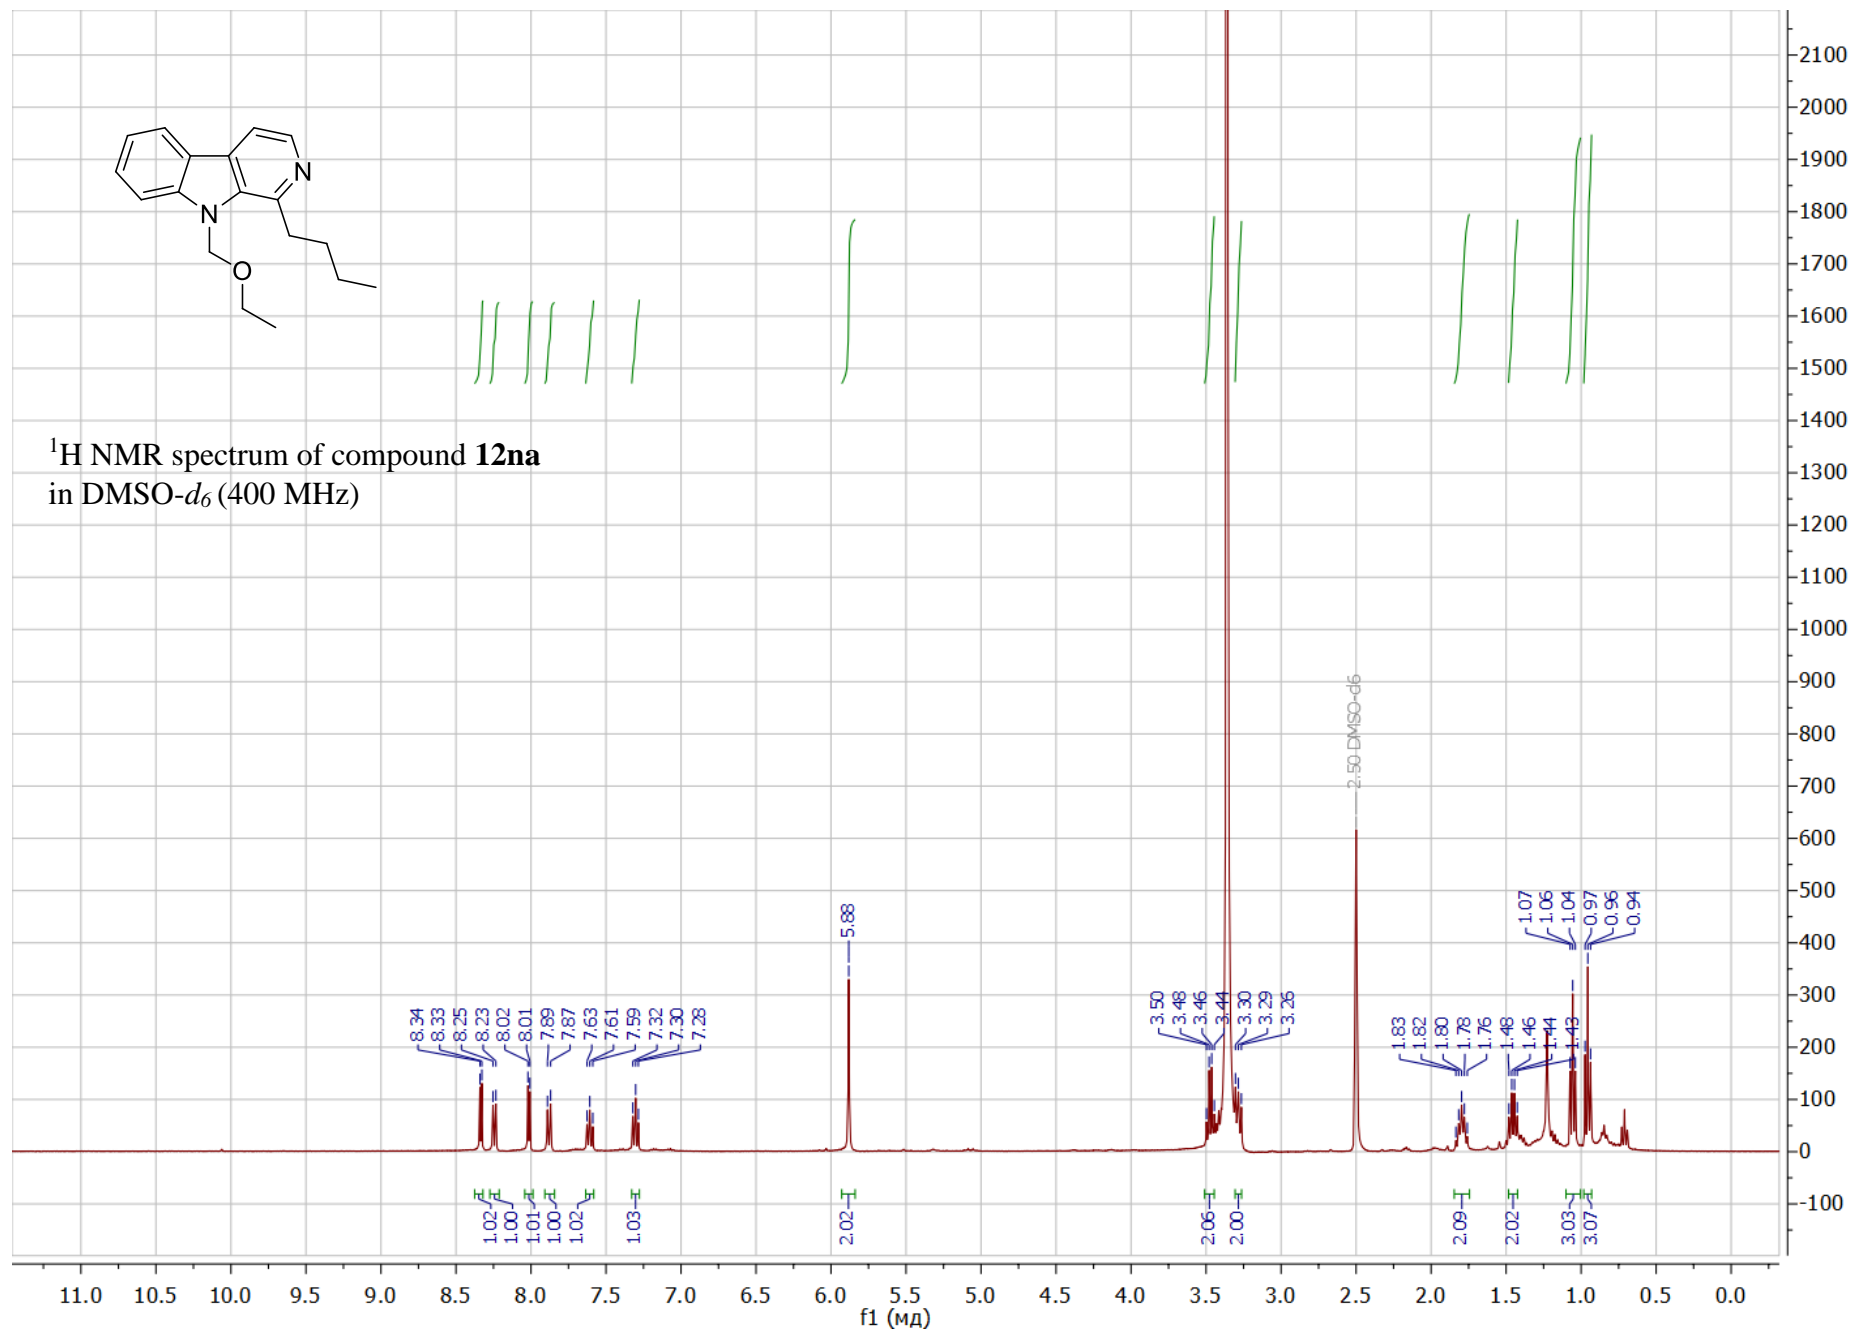

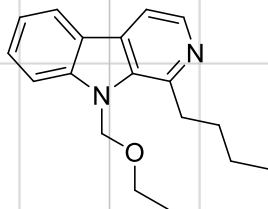

$^{13}\text{C}$  { $^1\text{H}$ } spectrum of compound **12na**  
in DMSO- $d_6$  (101 MHz)

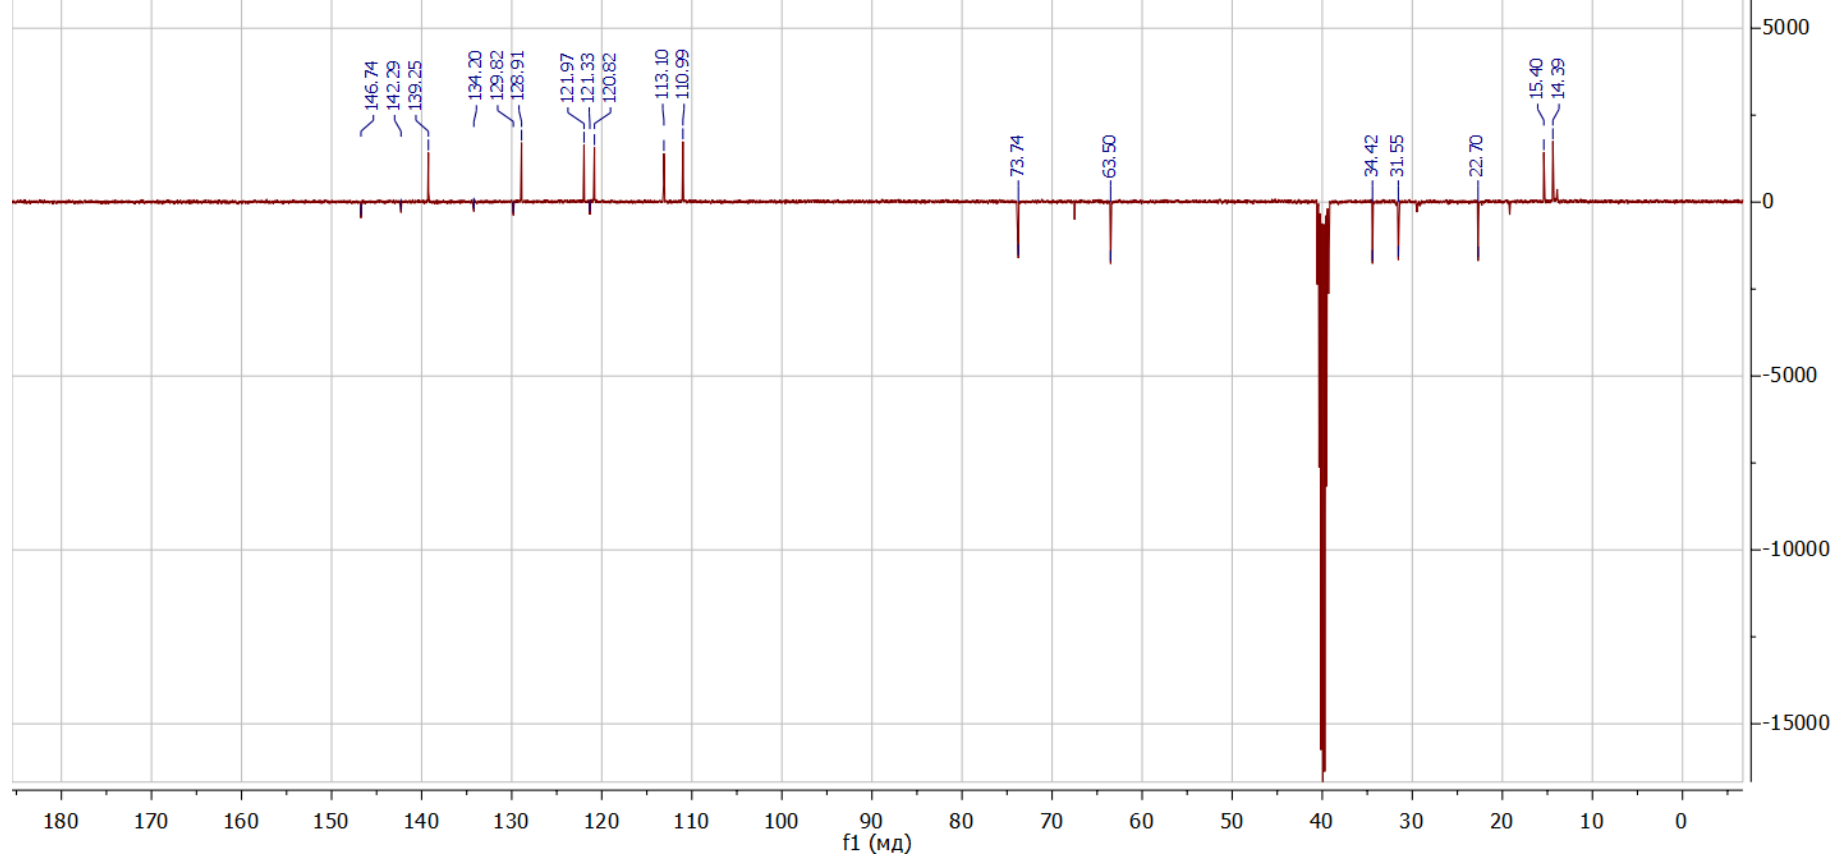

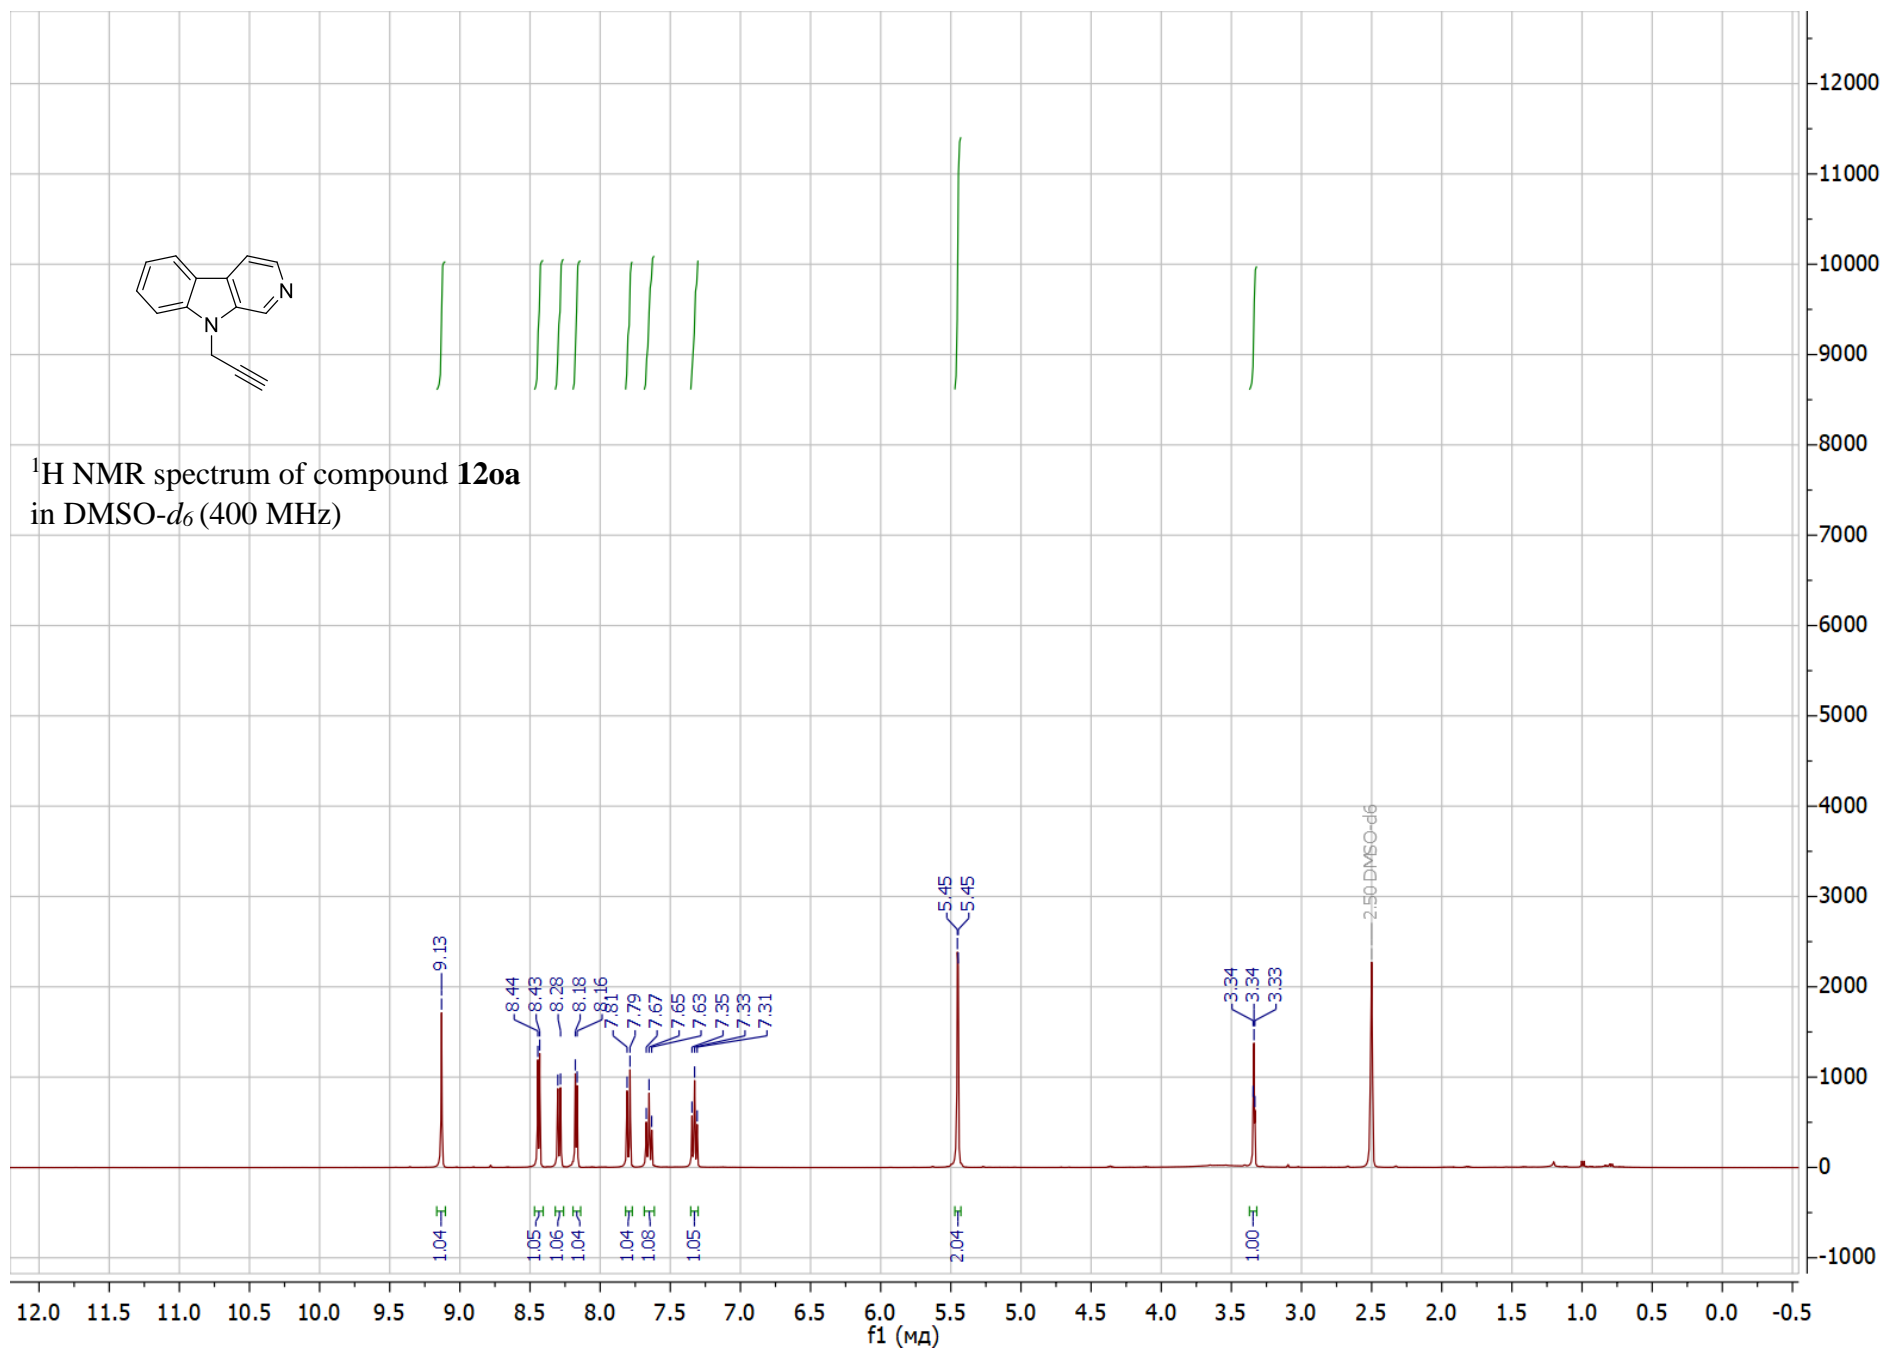

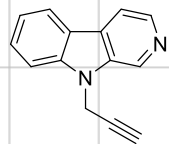

$^{13}\text{C}$  spectrum of compound **12oa**  
in DMSO- $d_6$  (101 MHz)

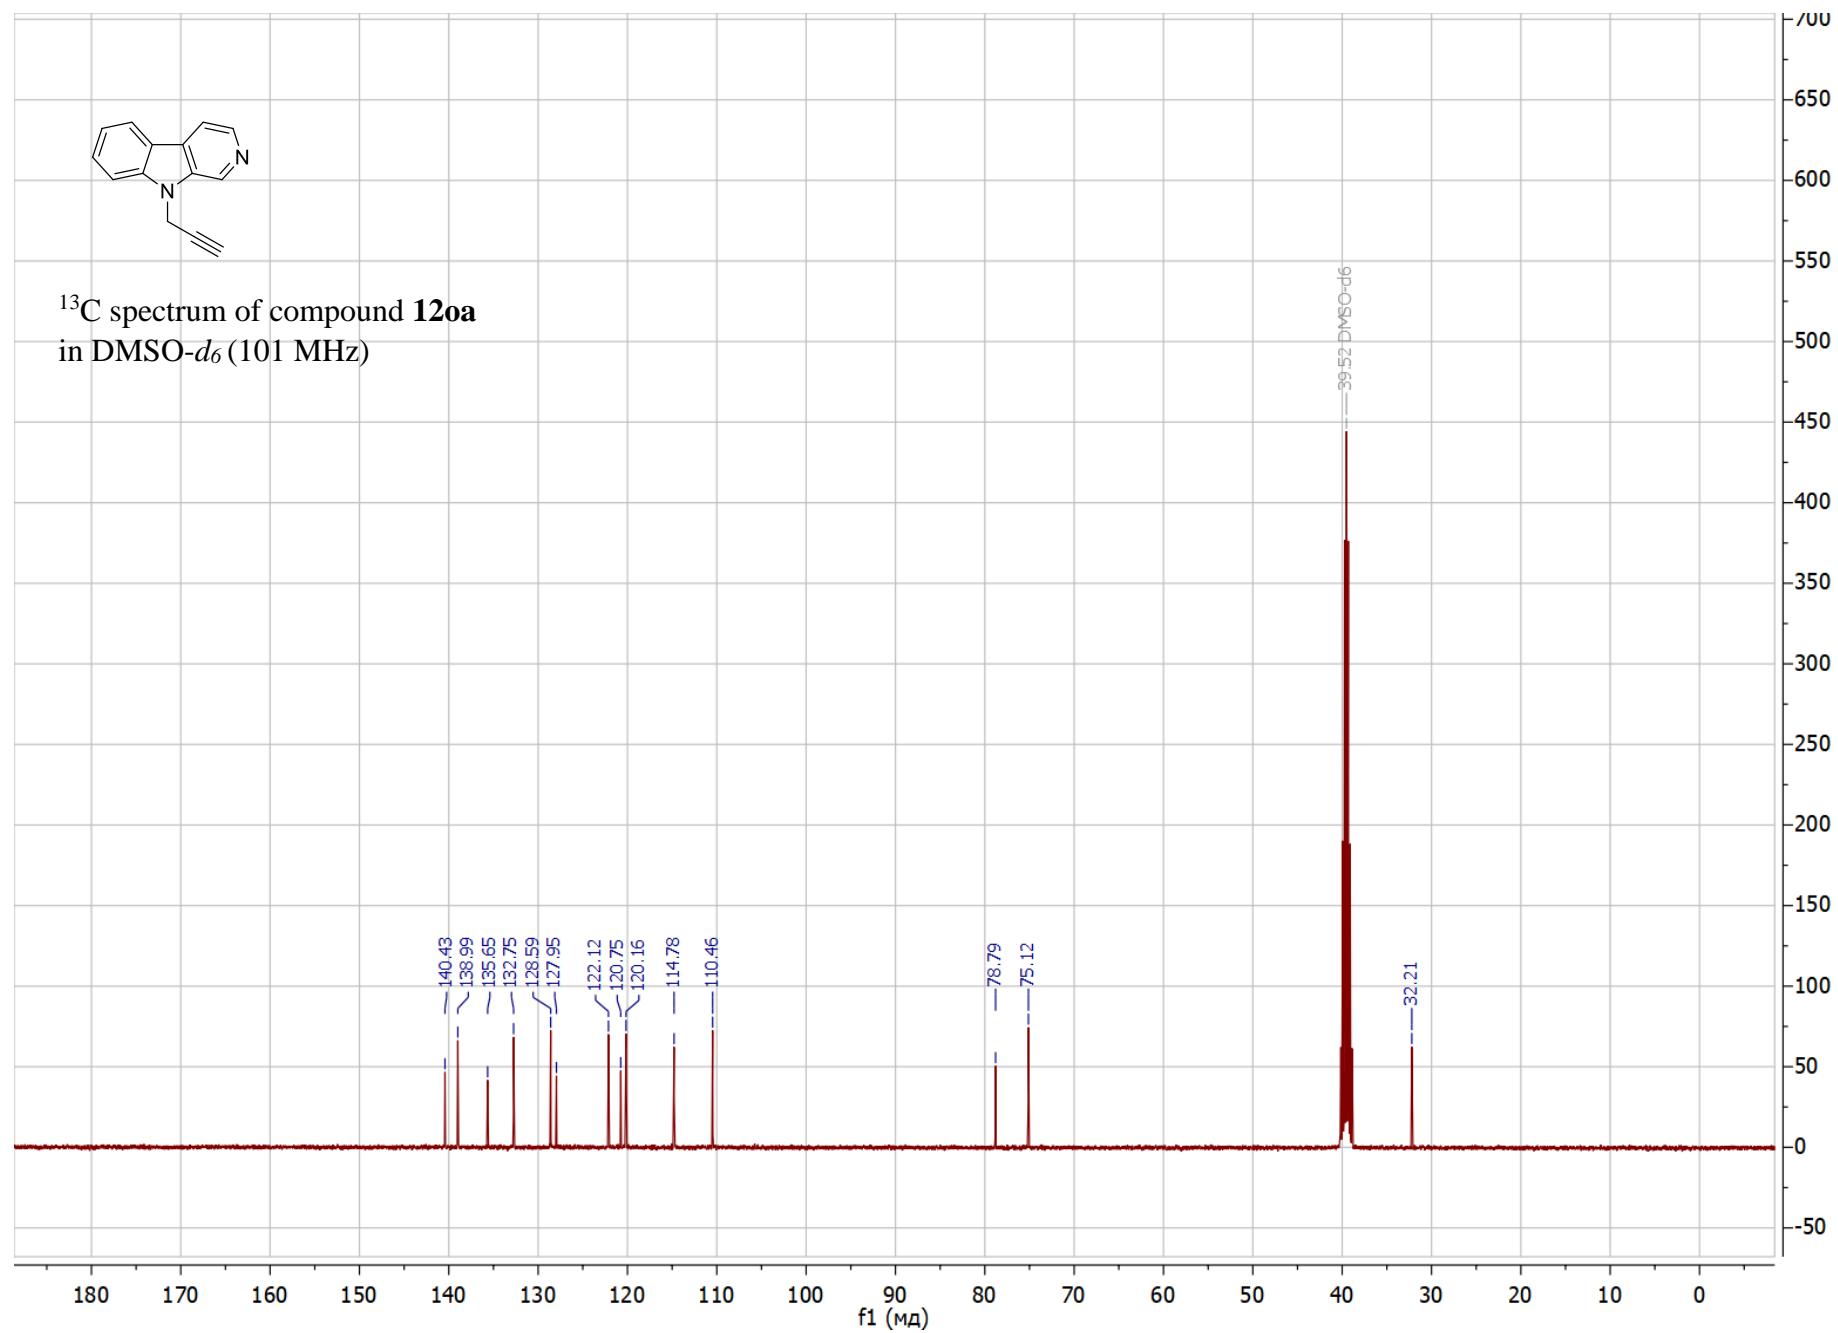

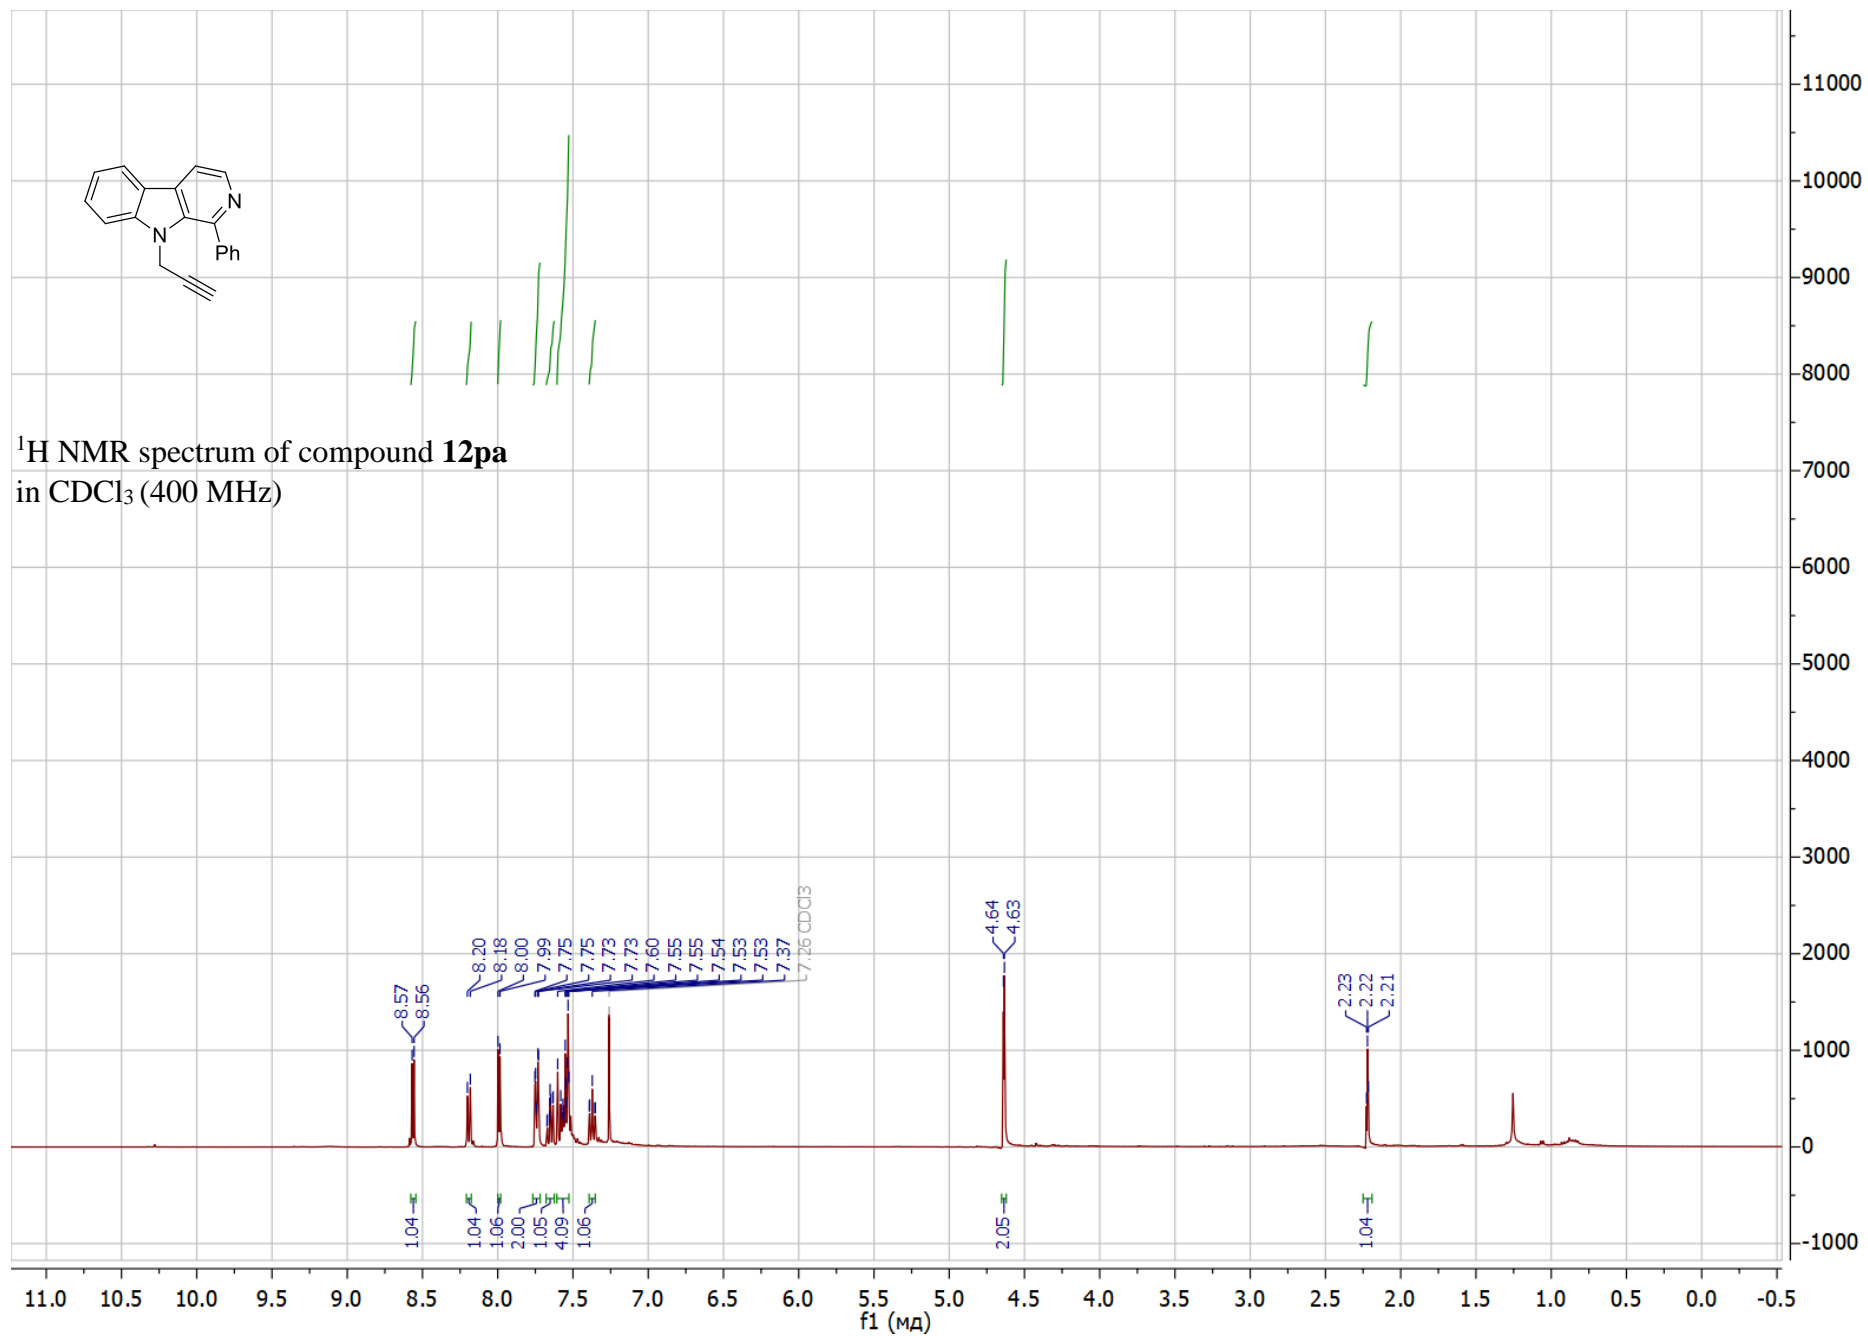

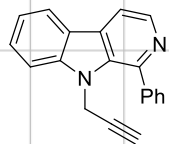

$^{13}\text{C}$  spectrum of compound **12pa**  
in  $\text{CDCl}_3$  (101 MHz)

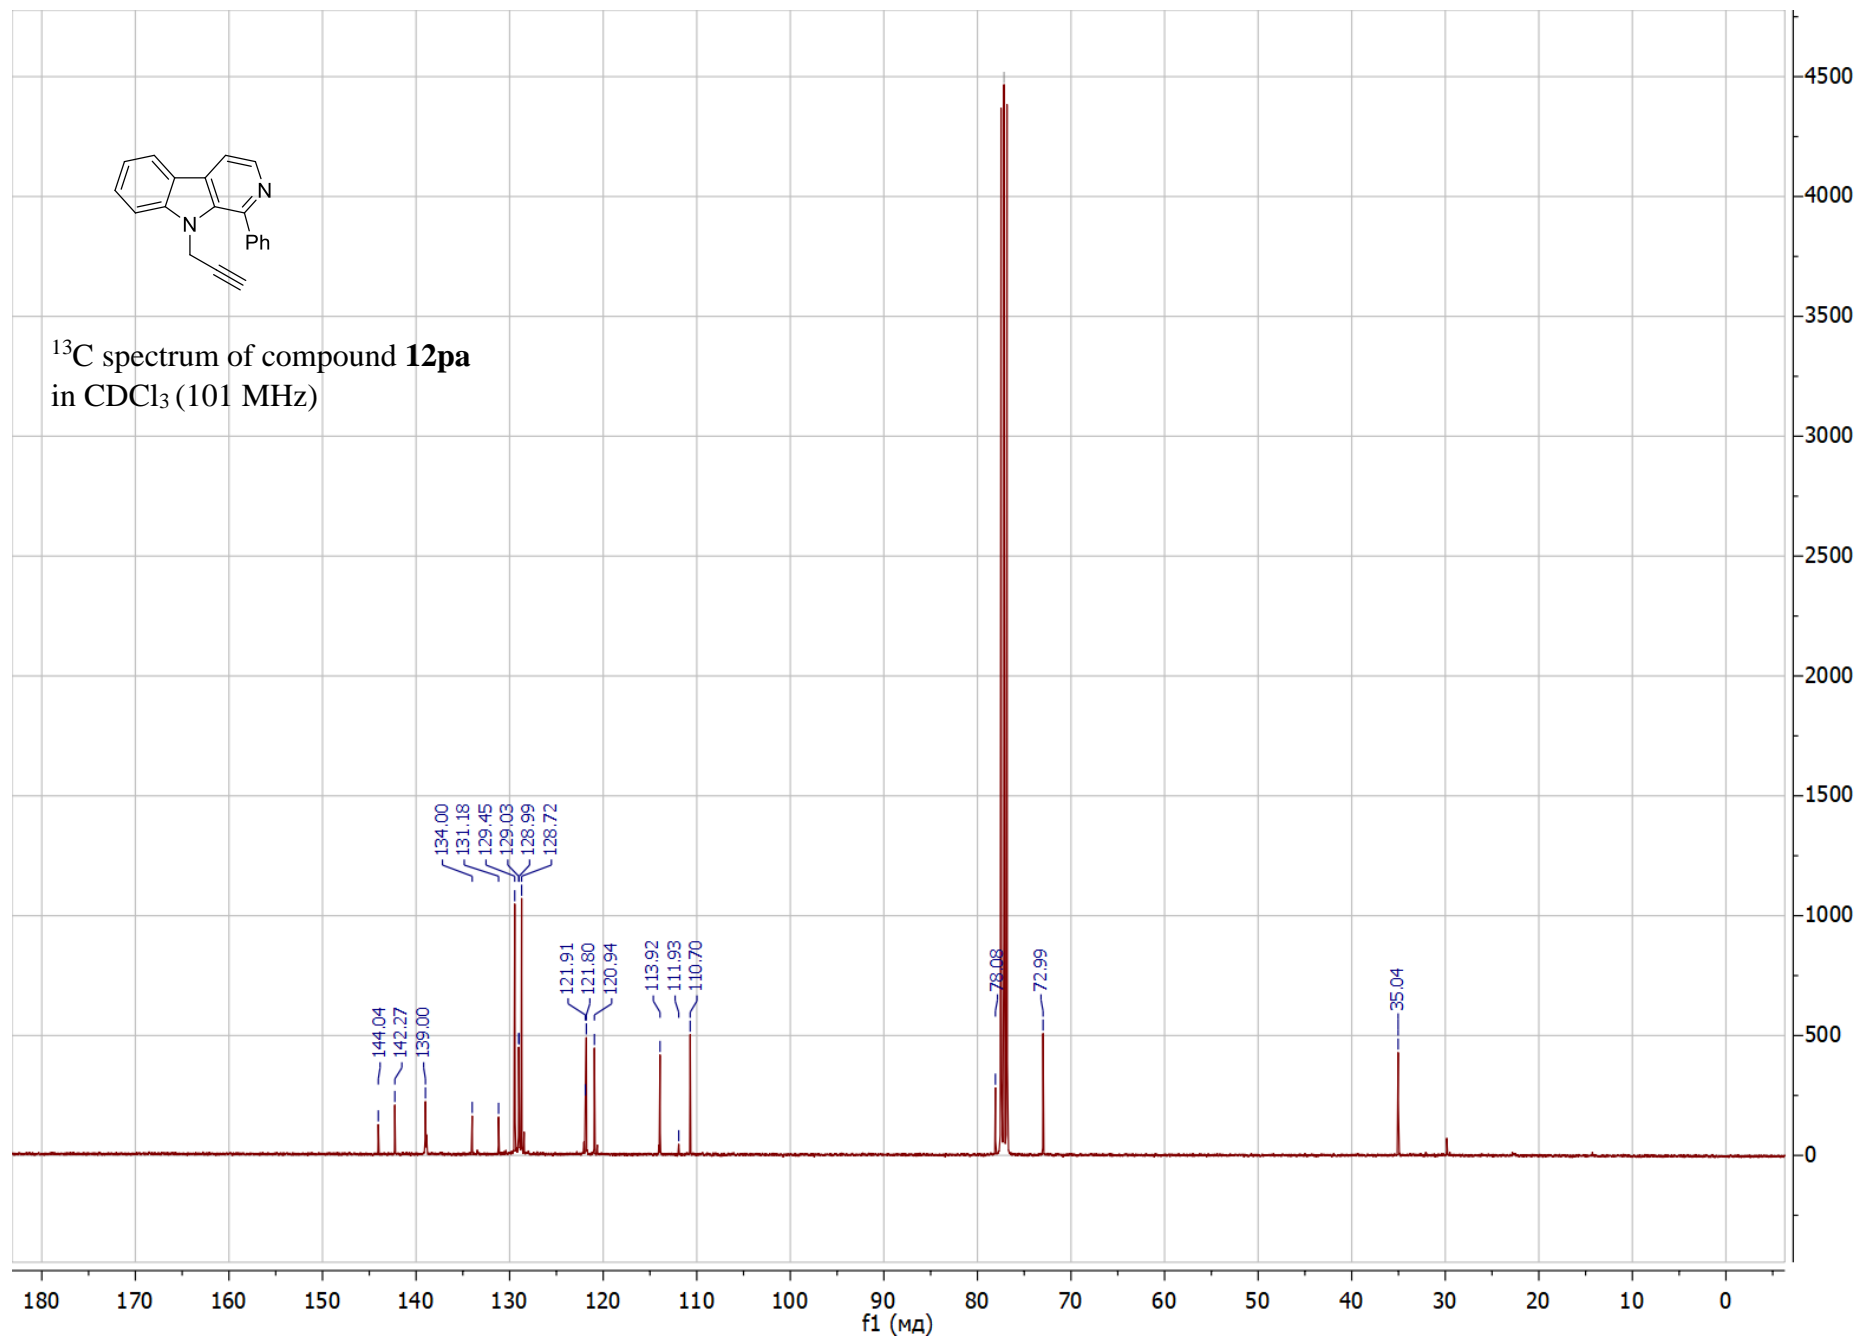



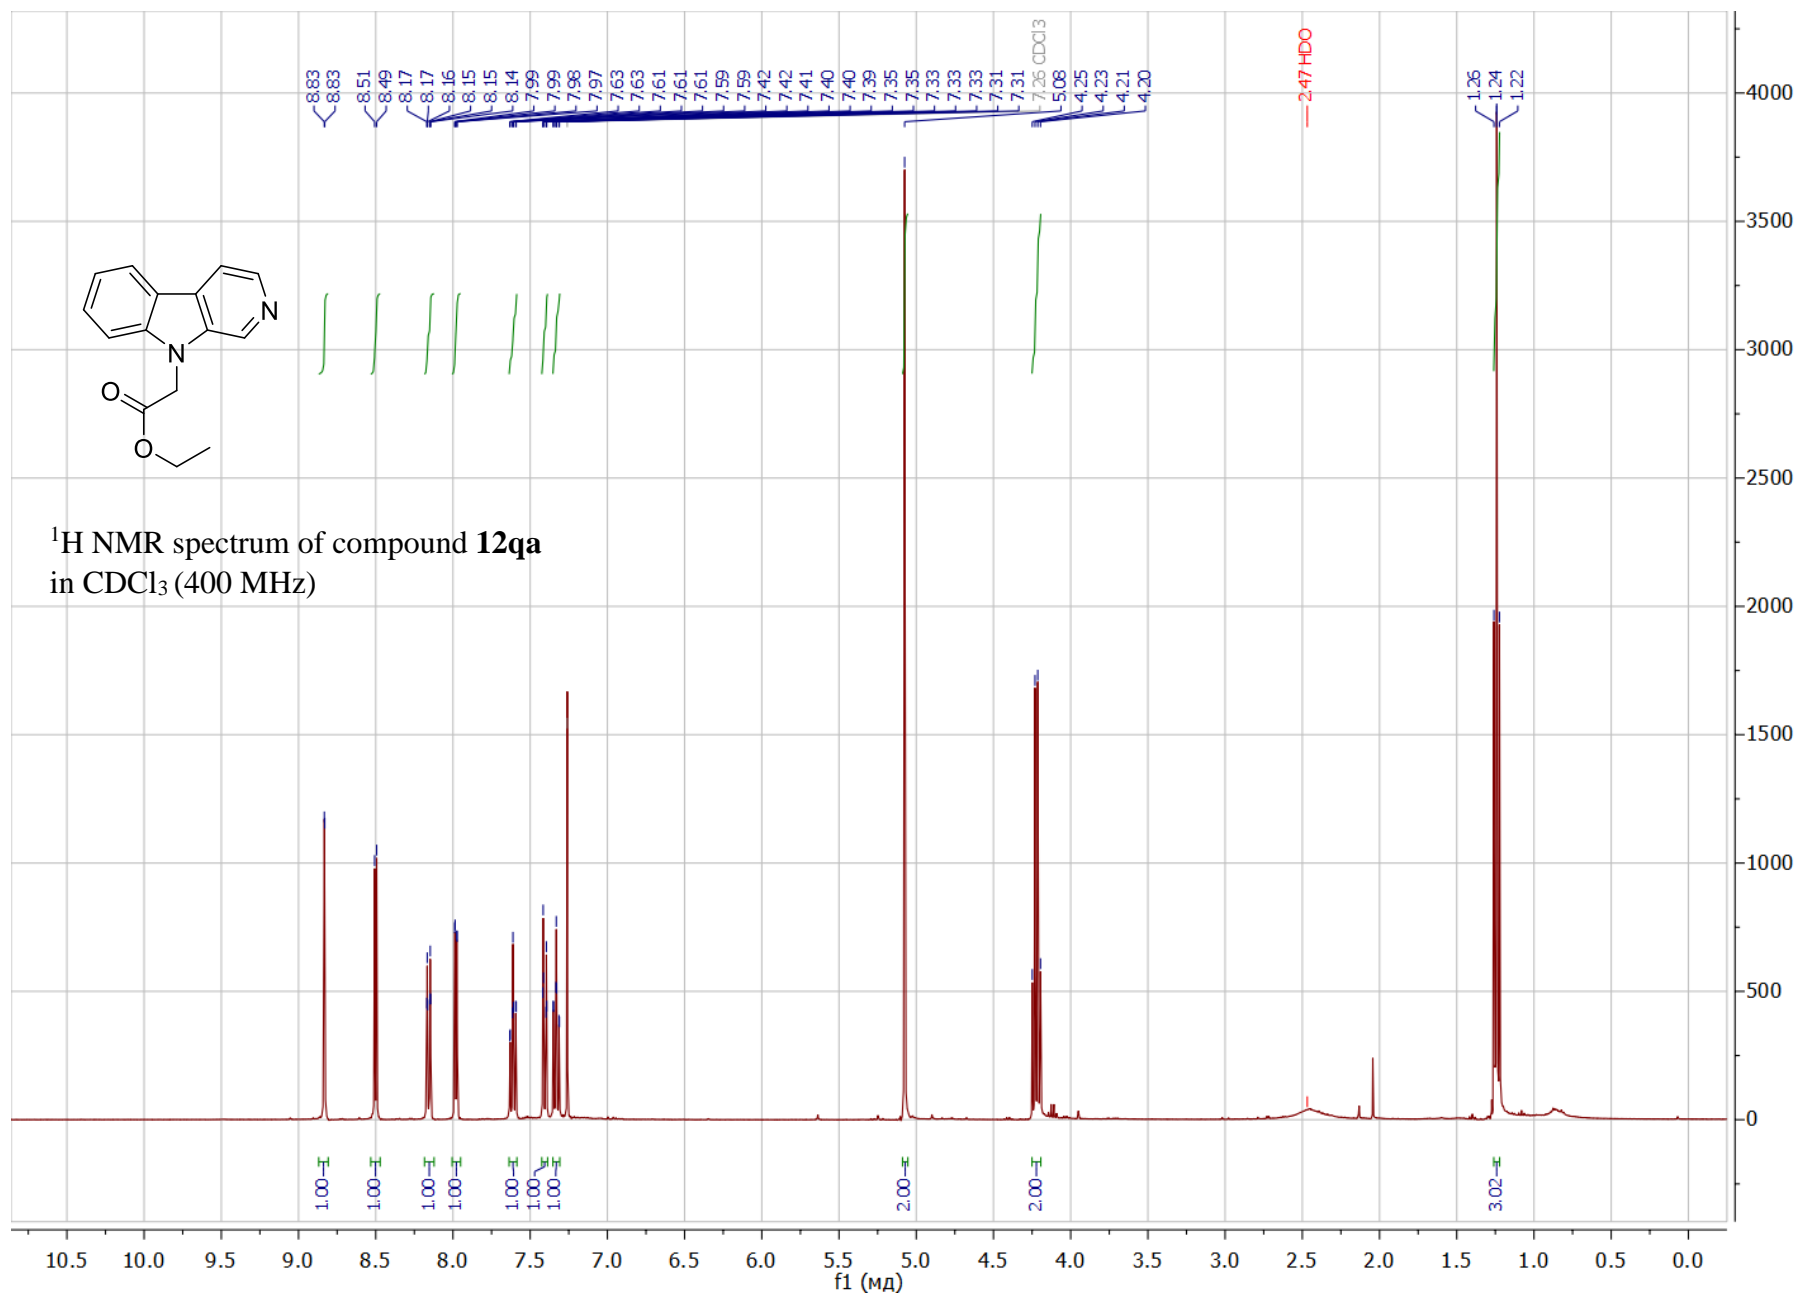

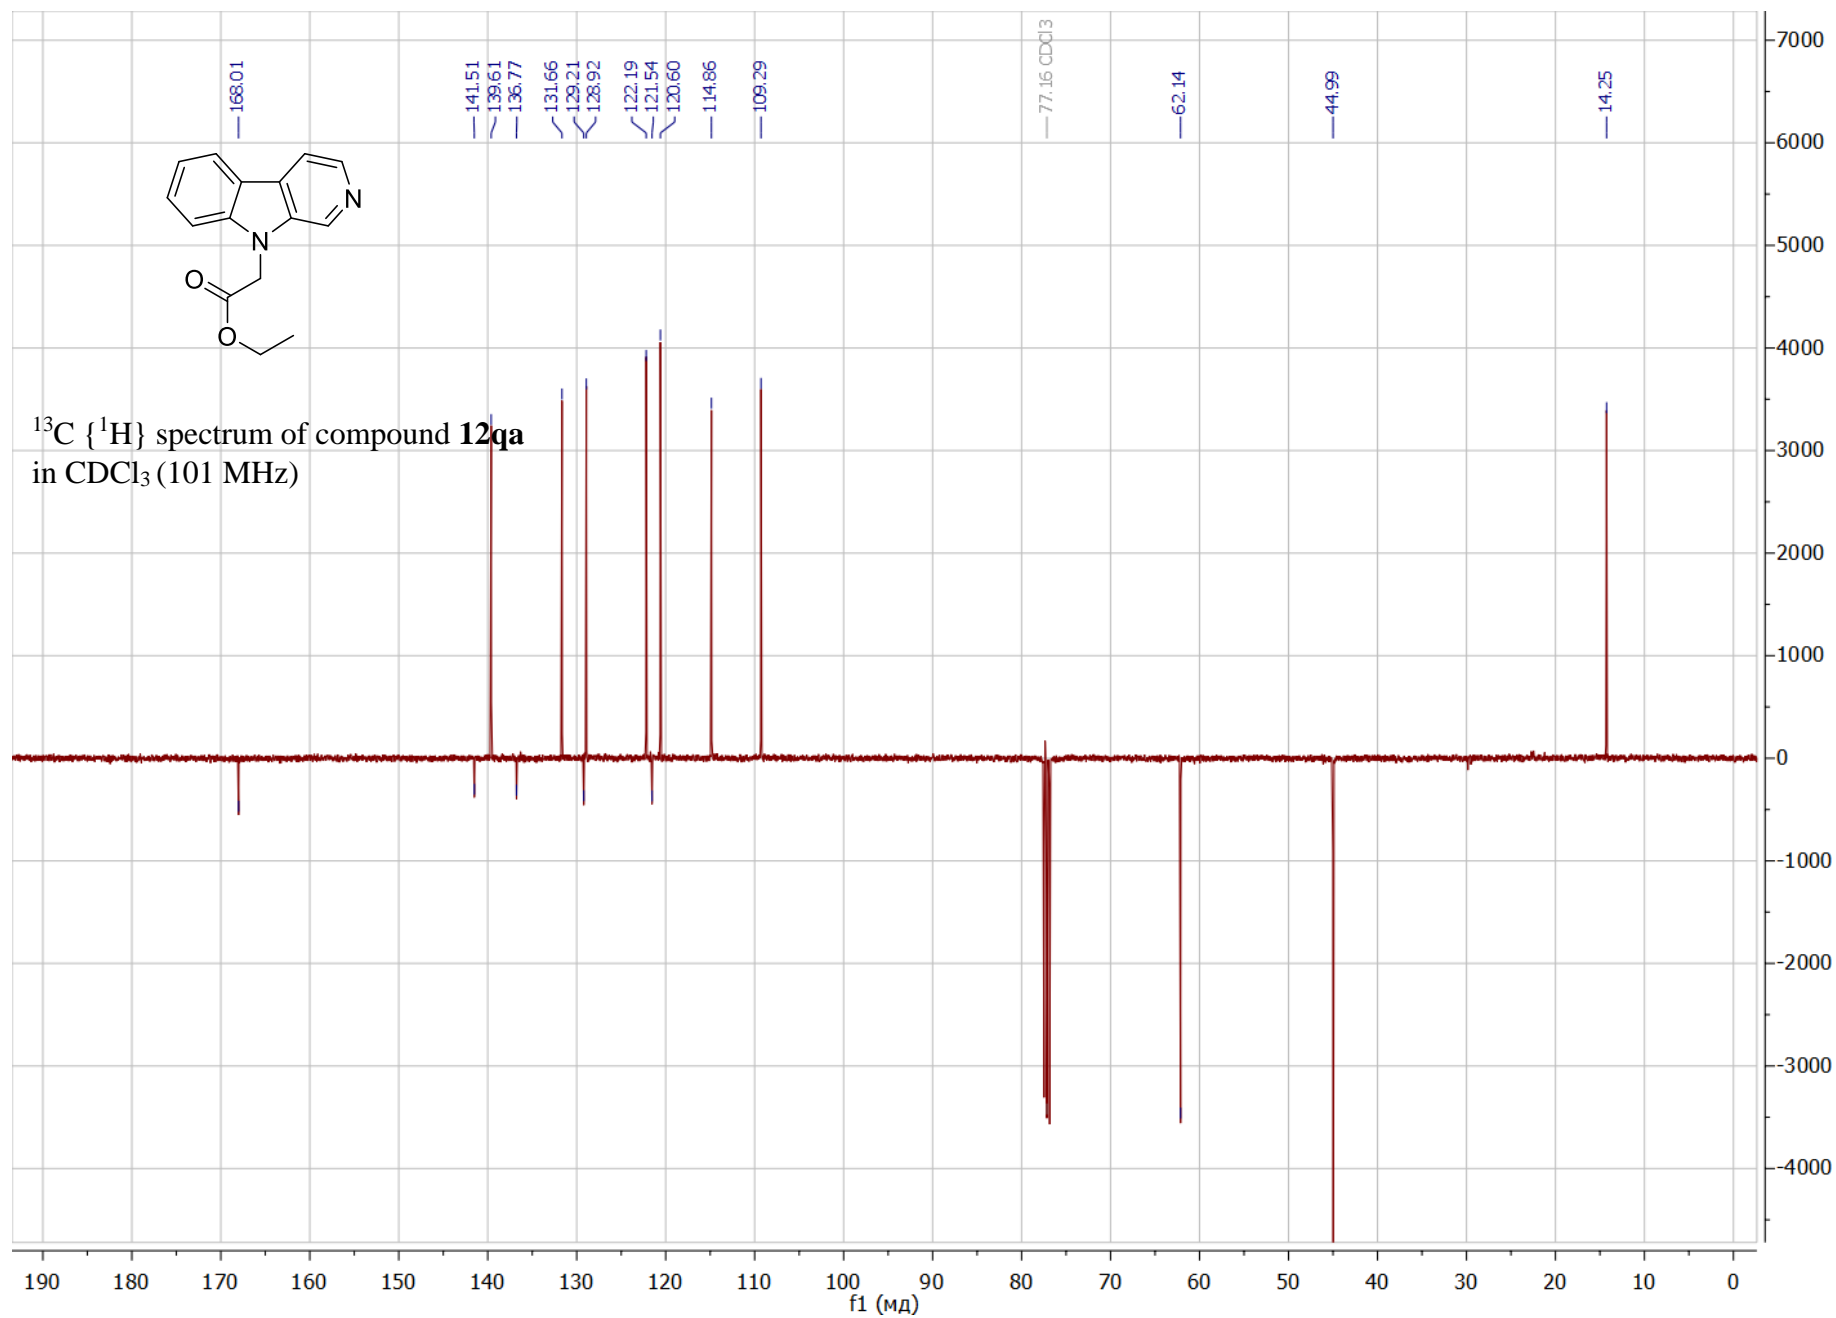

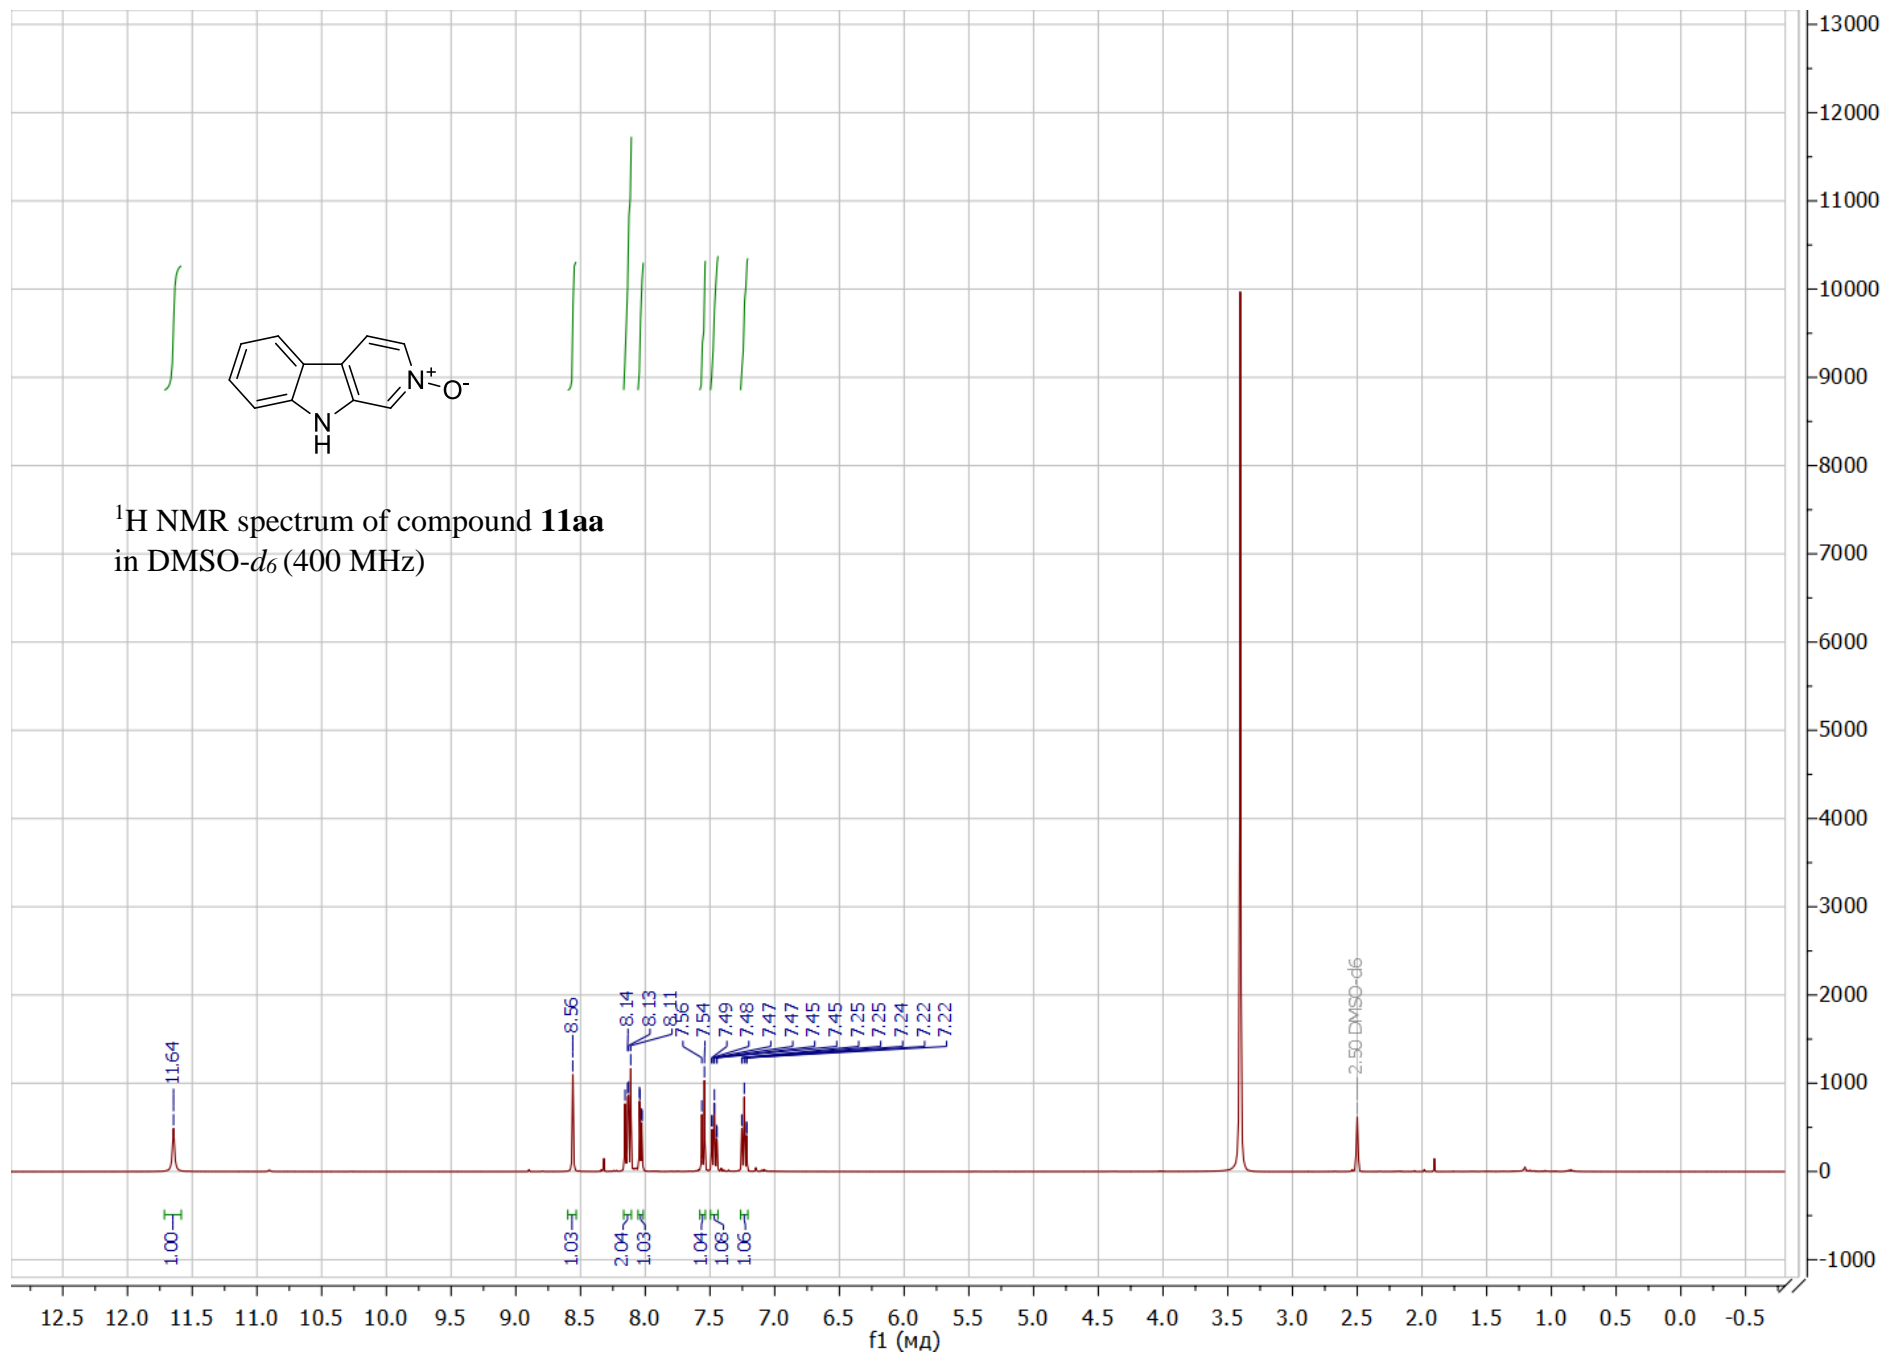

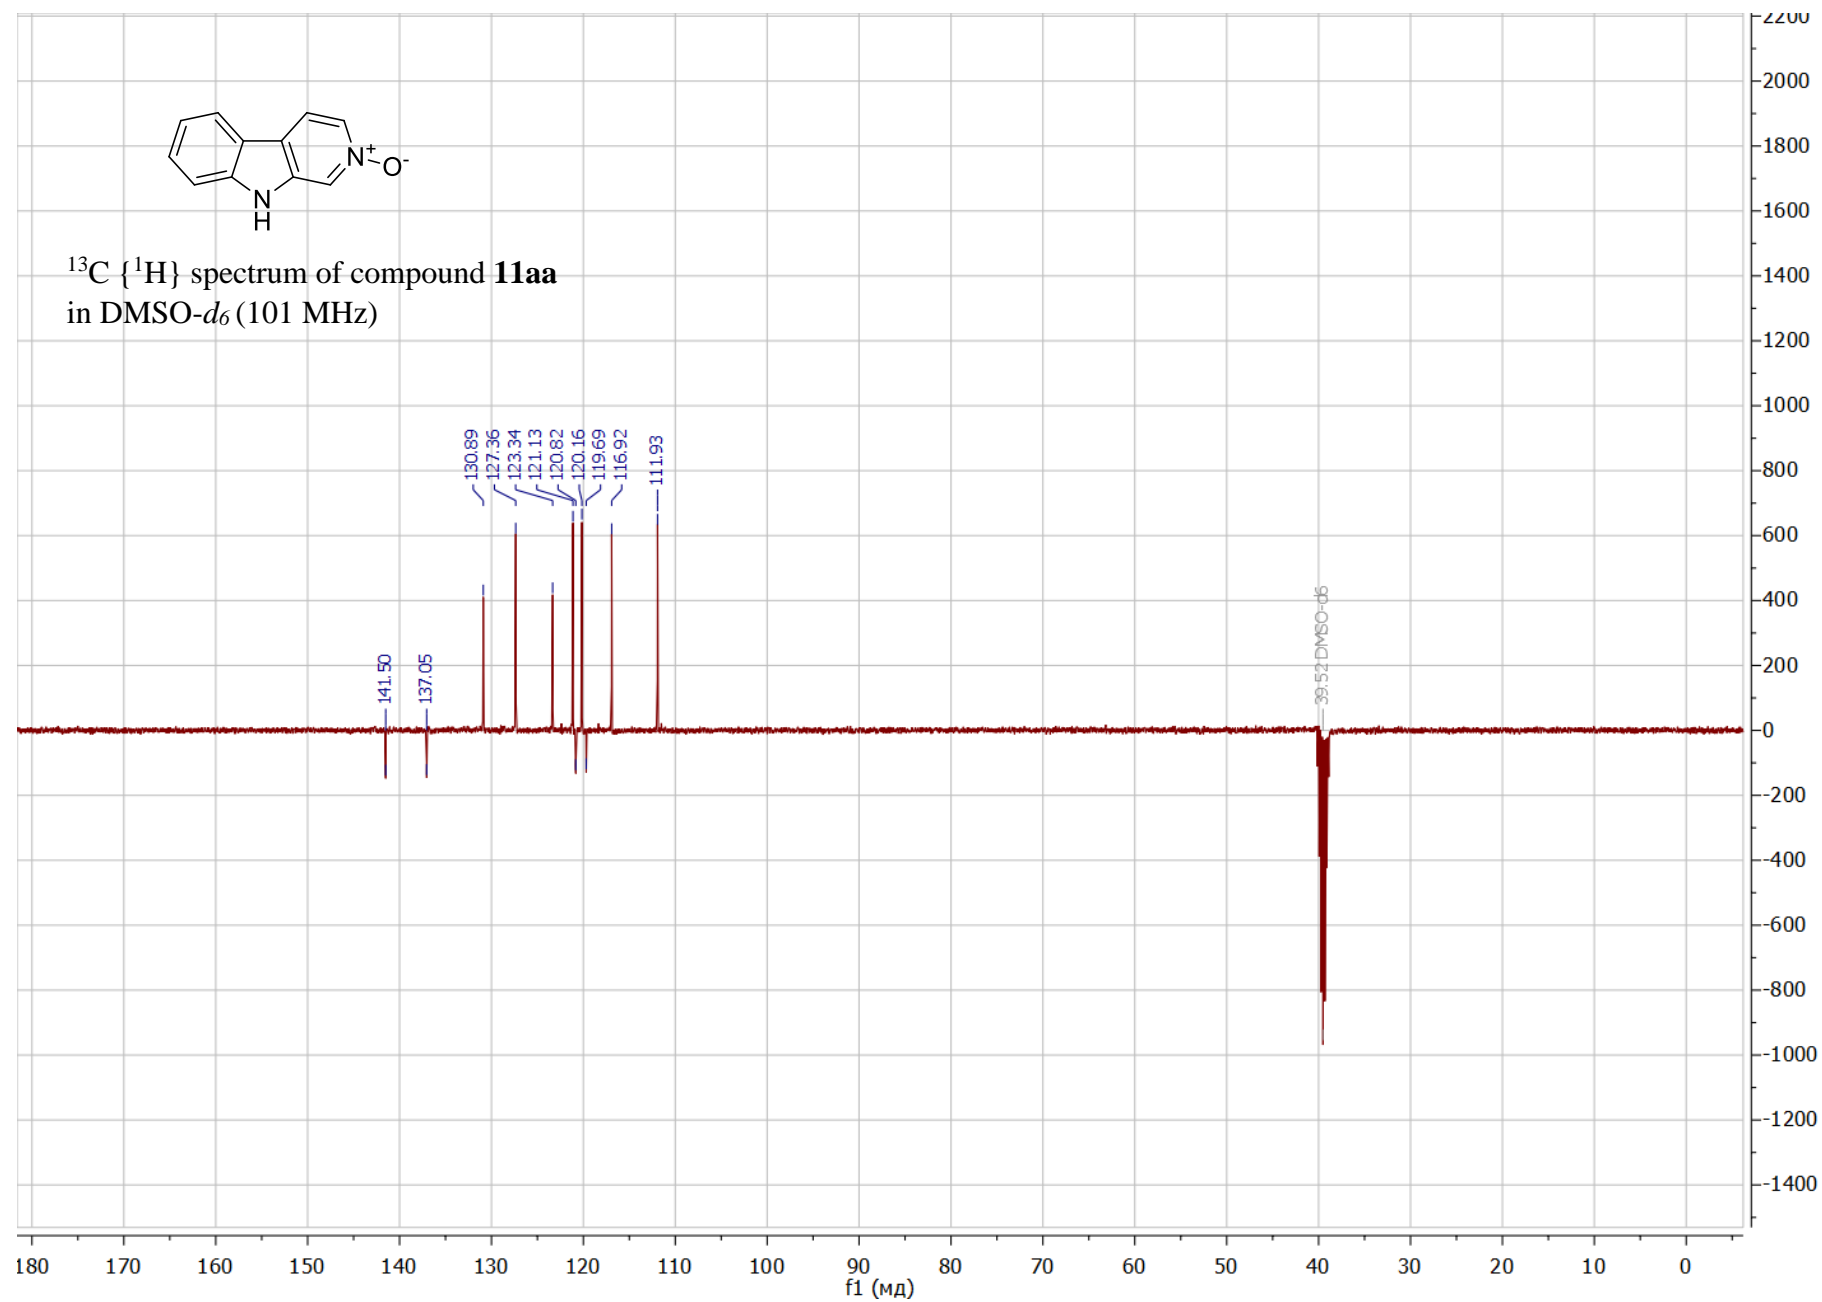

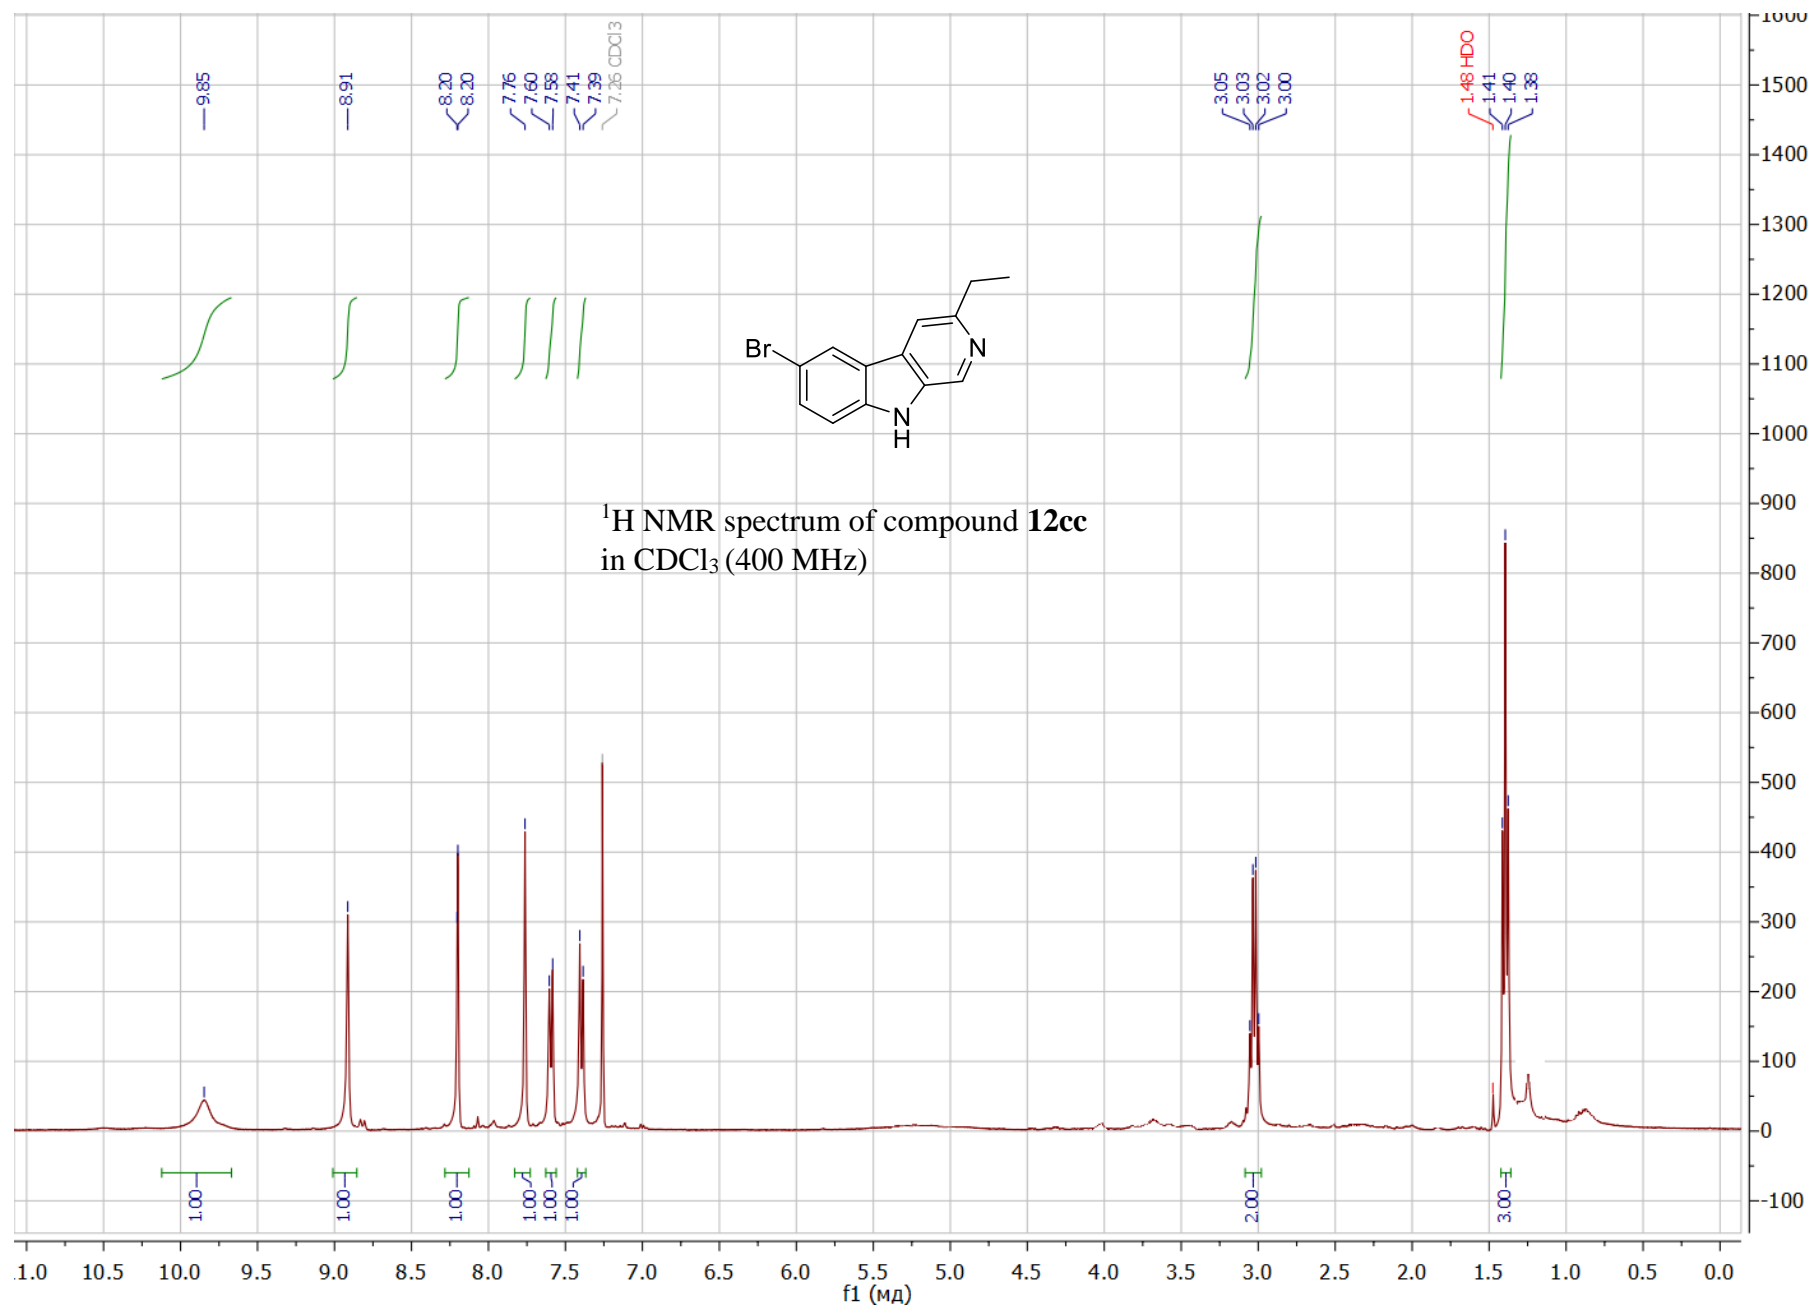

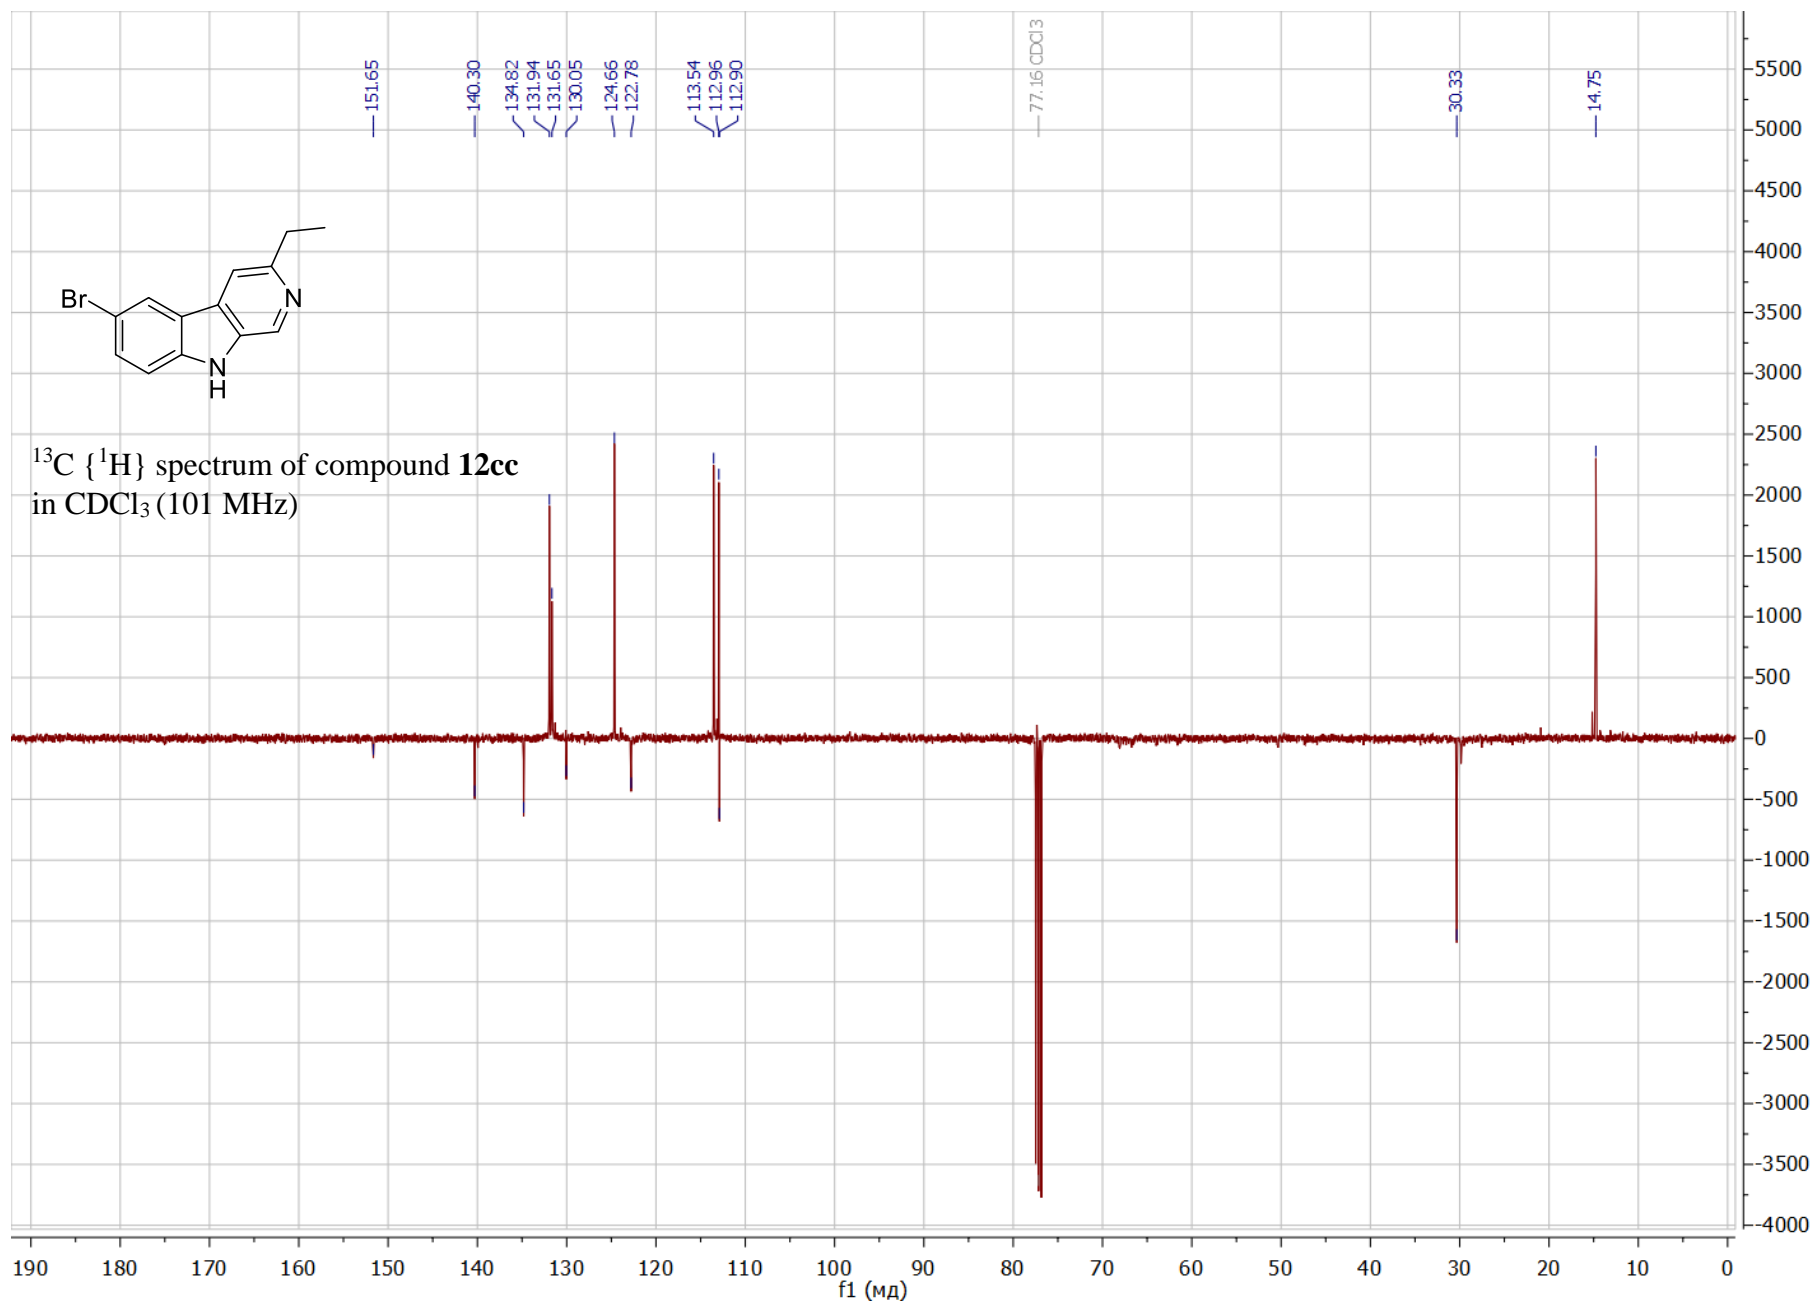

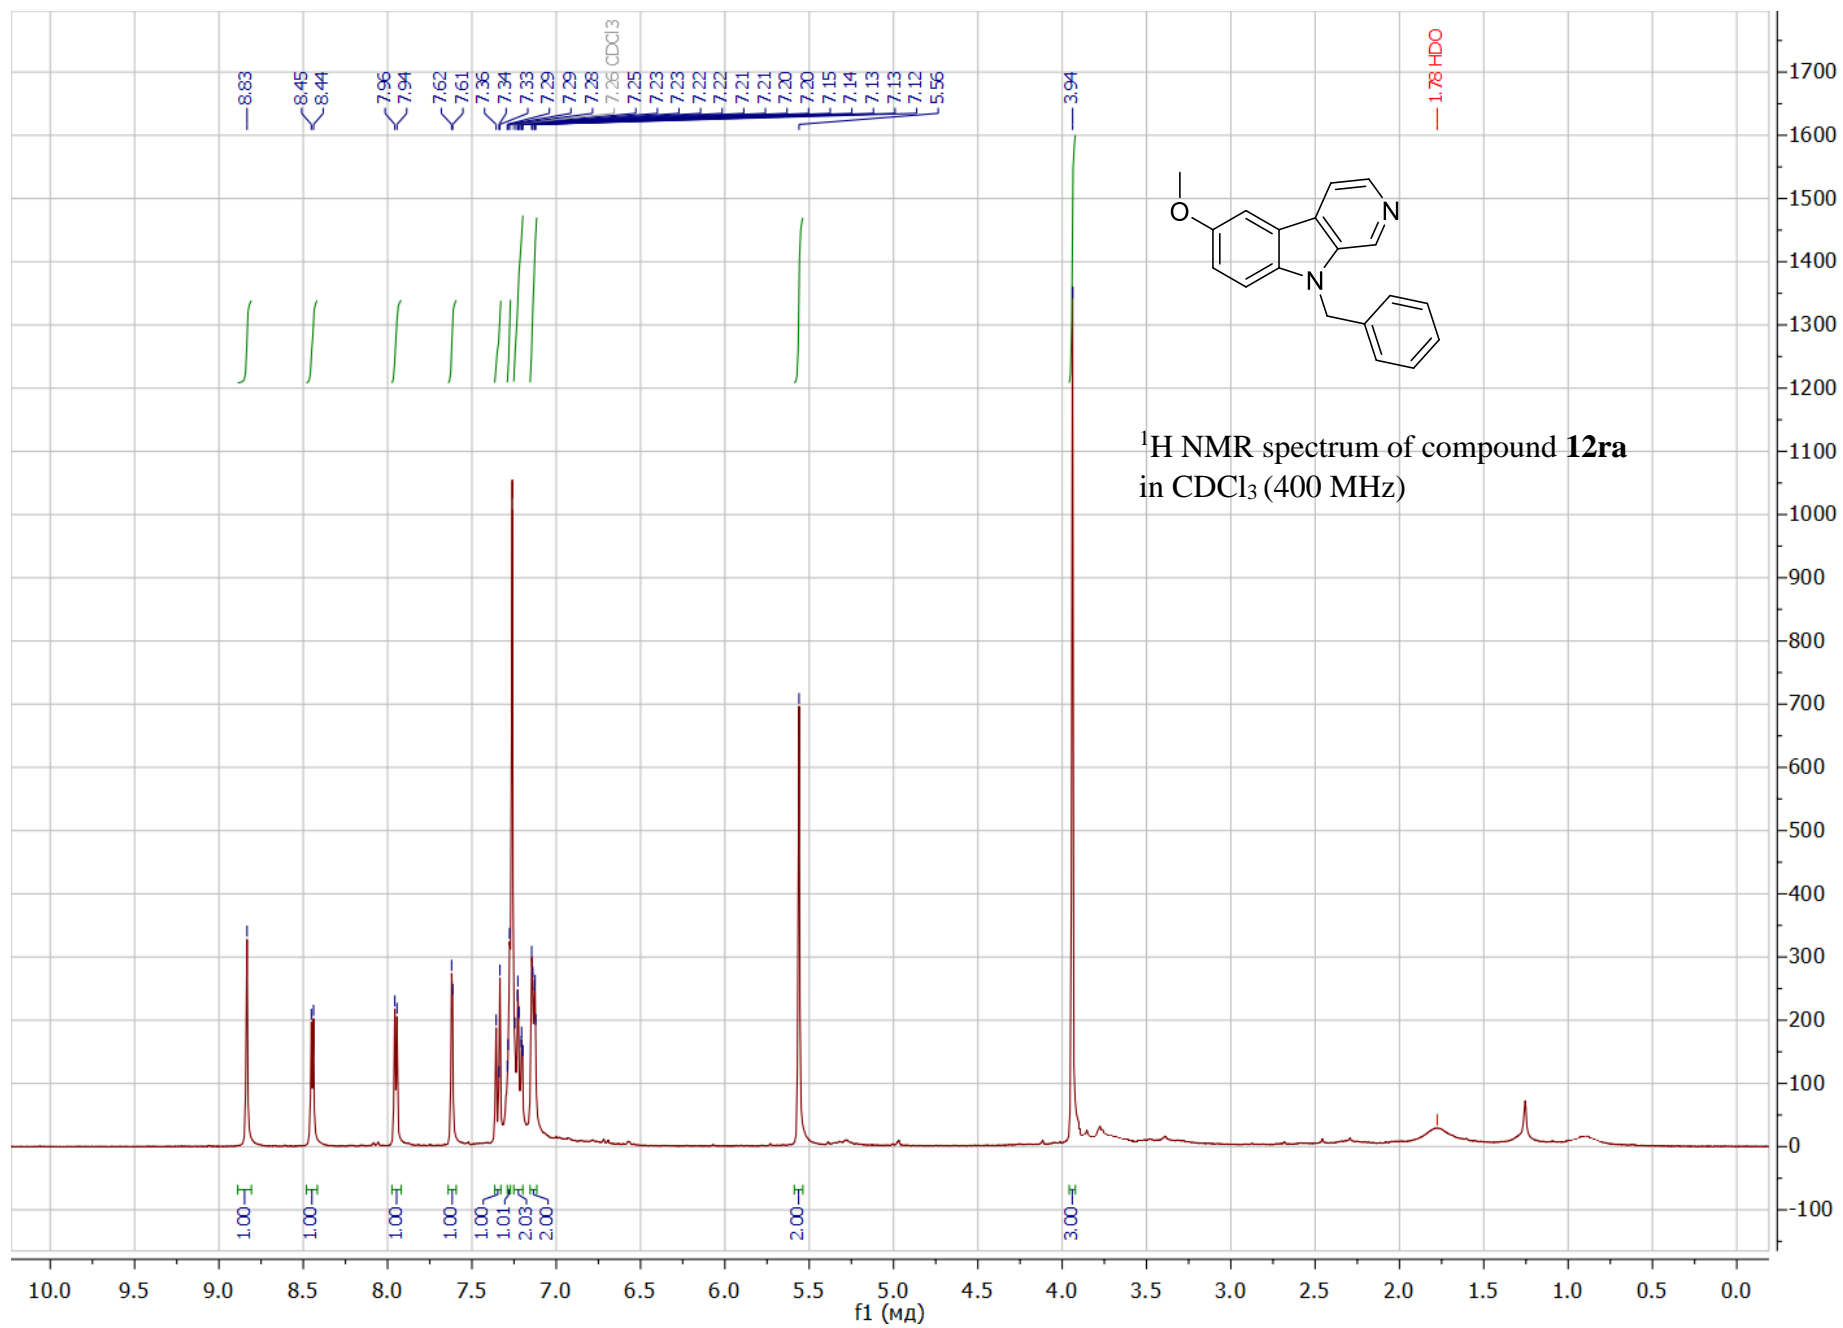

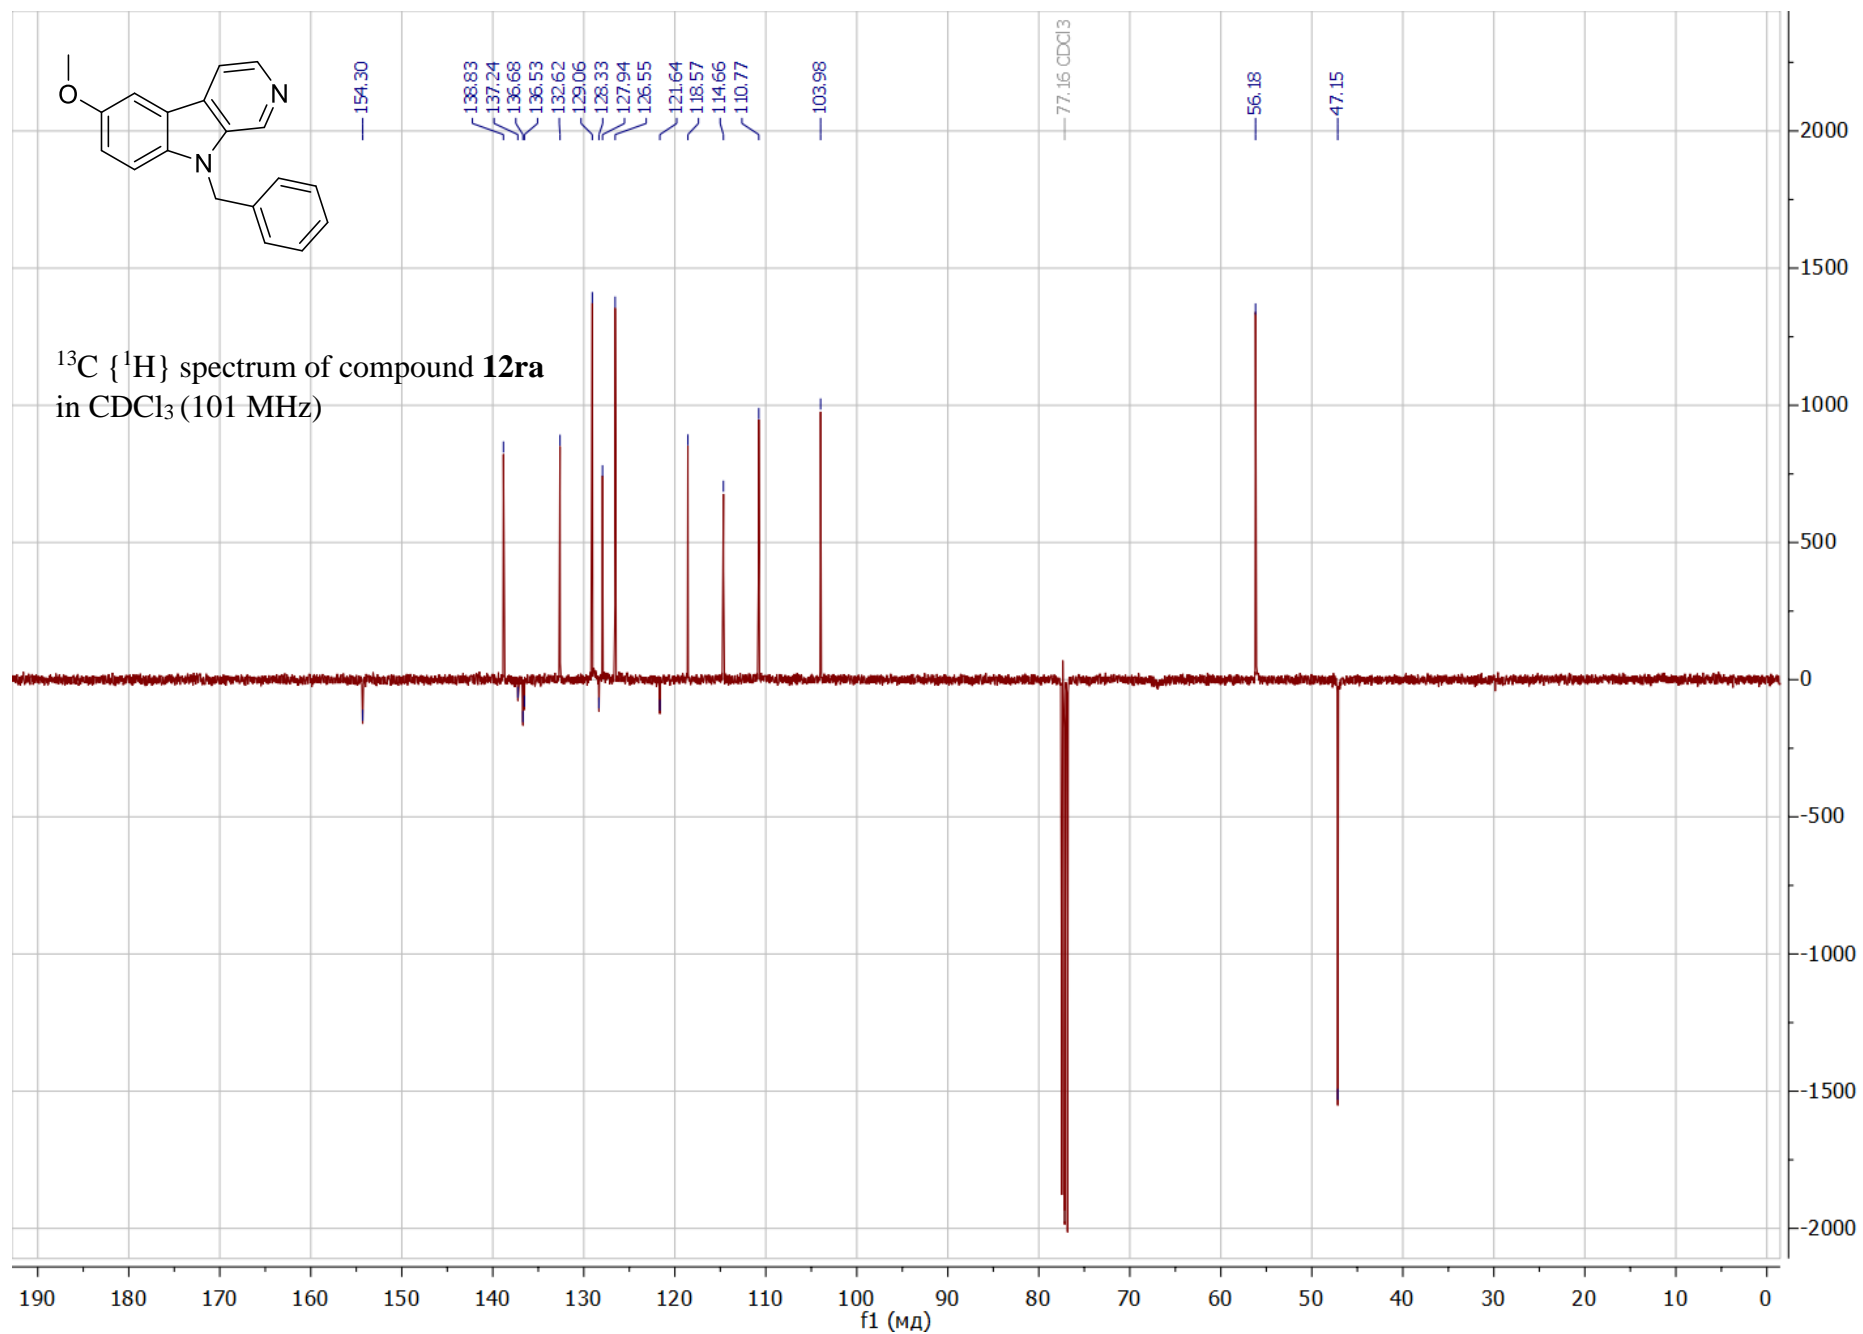



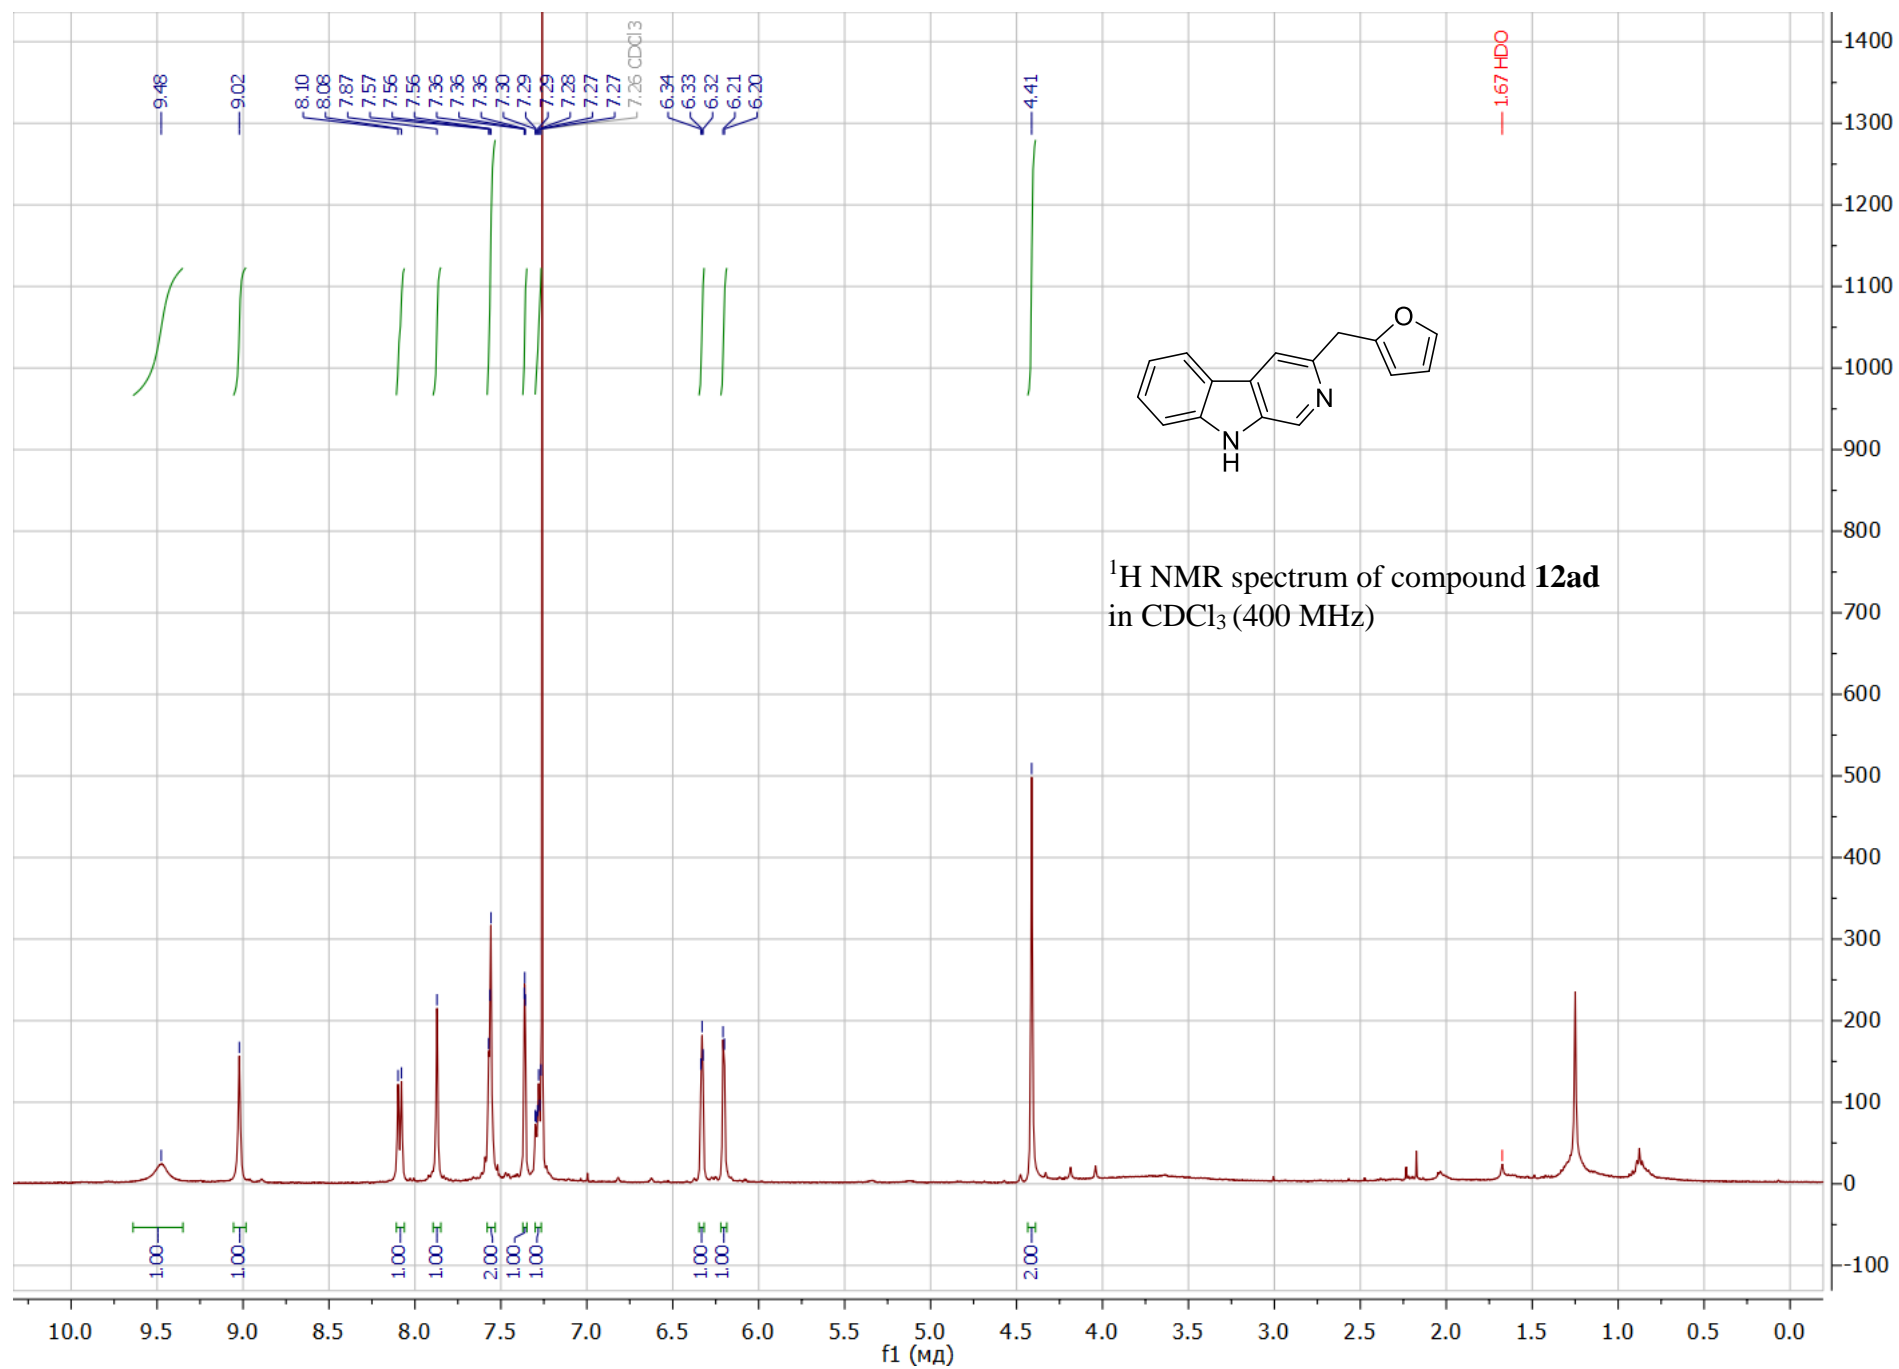

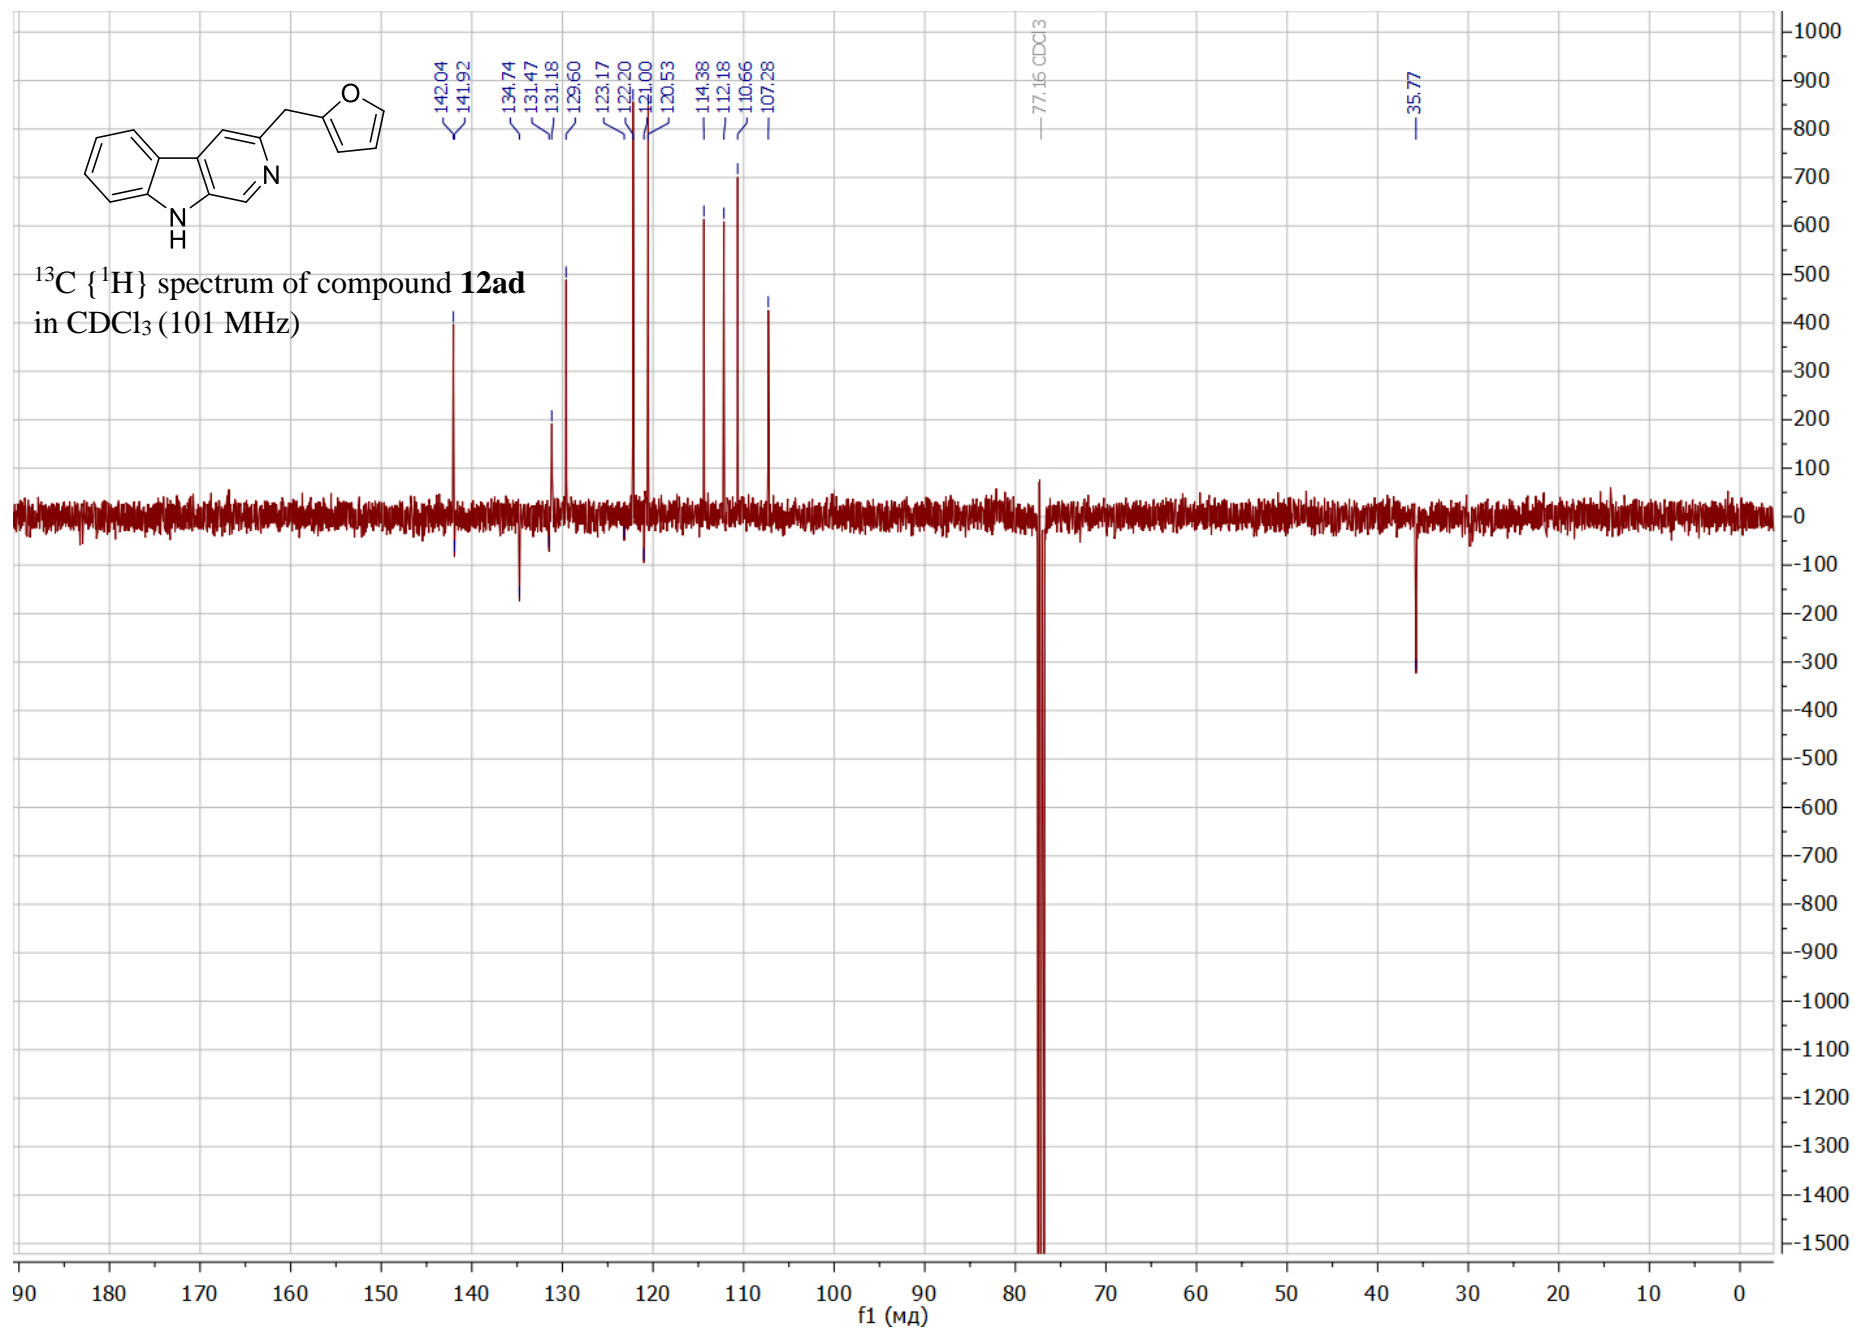

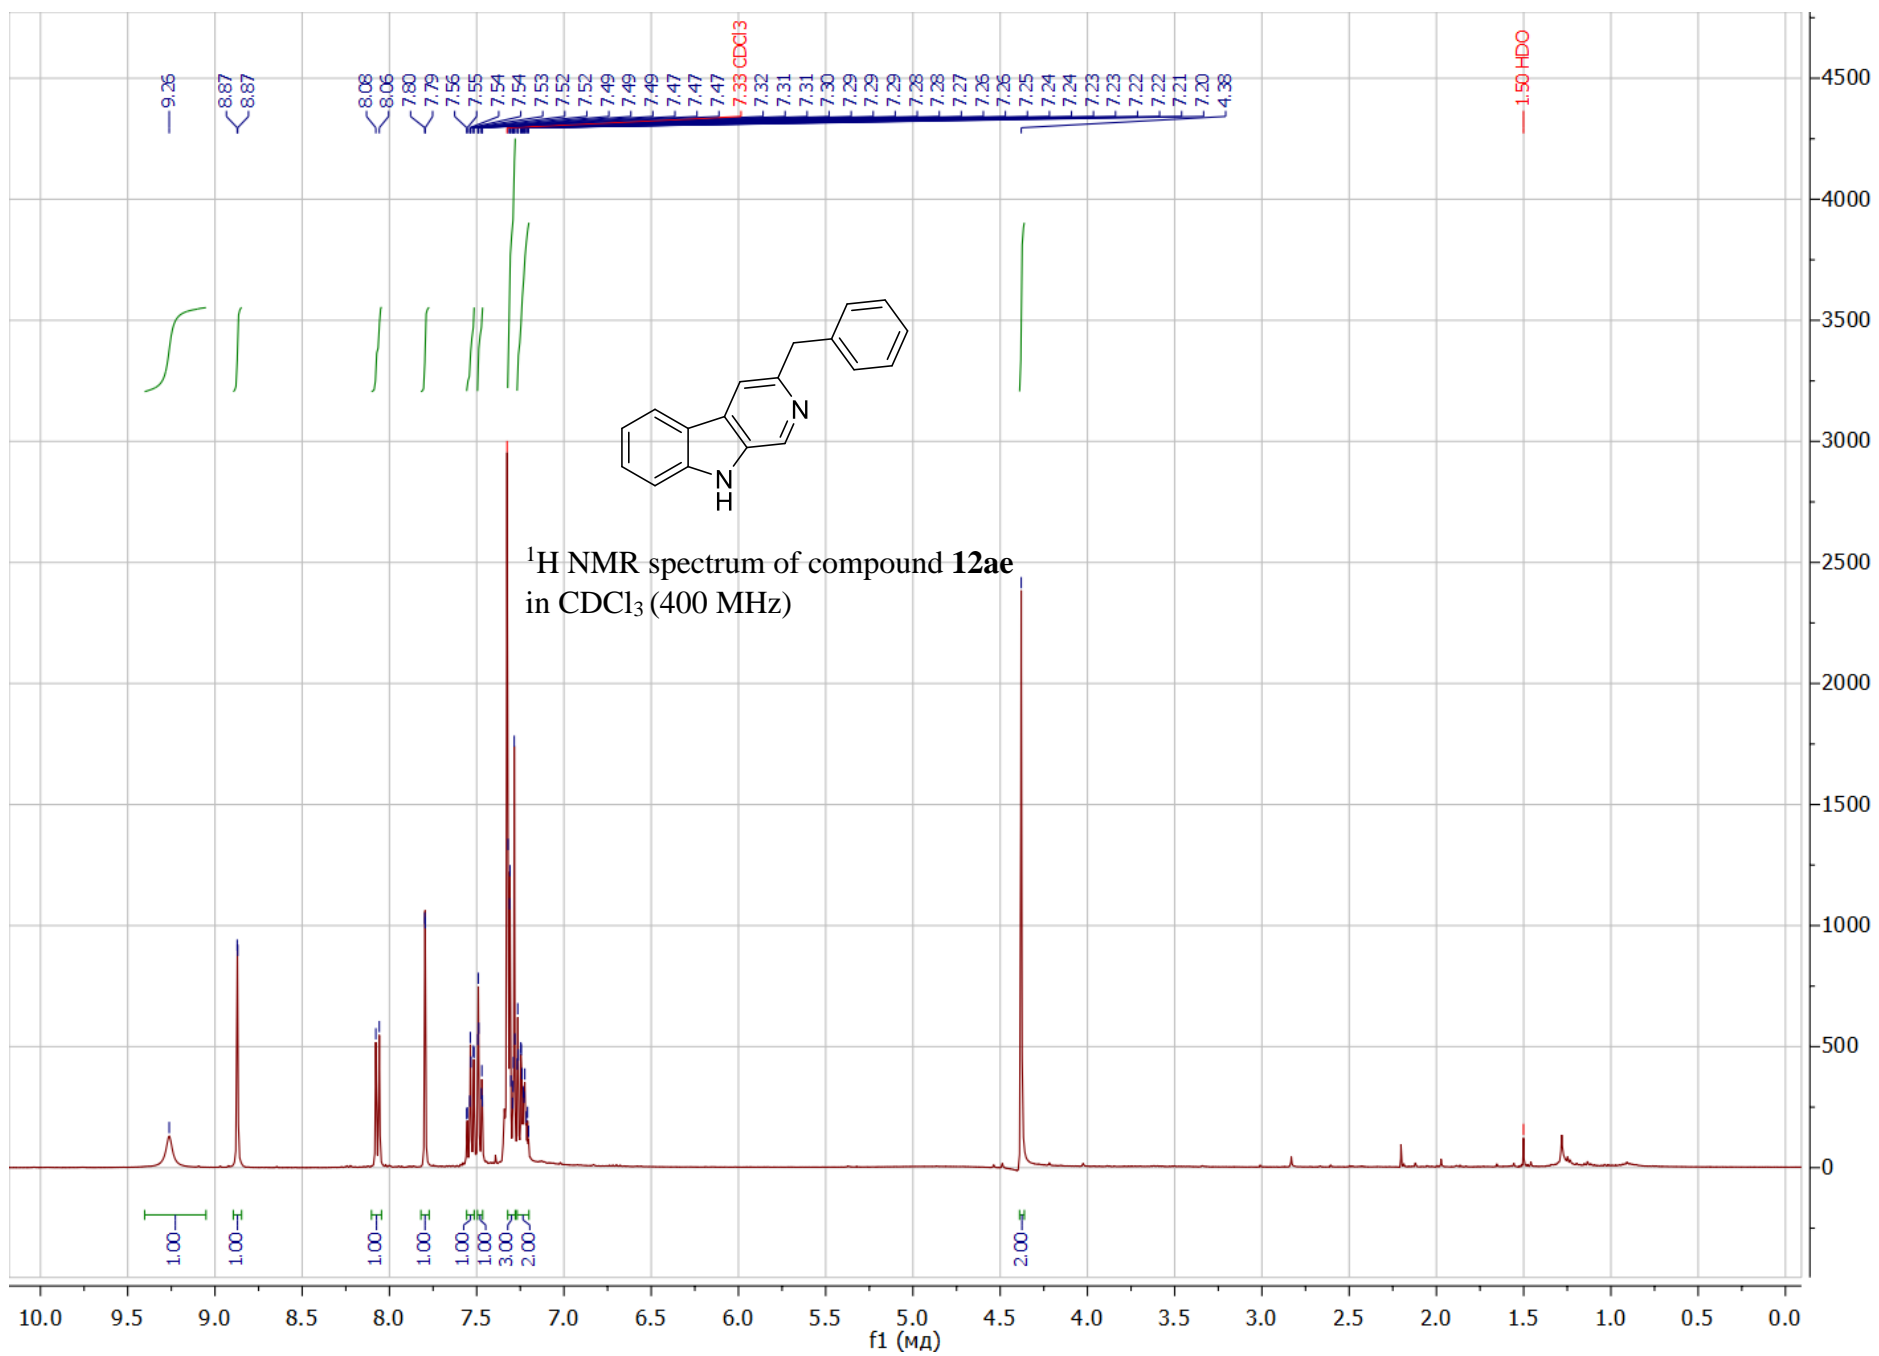

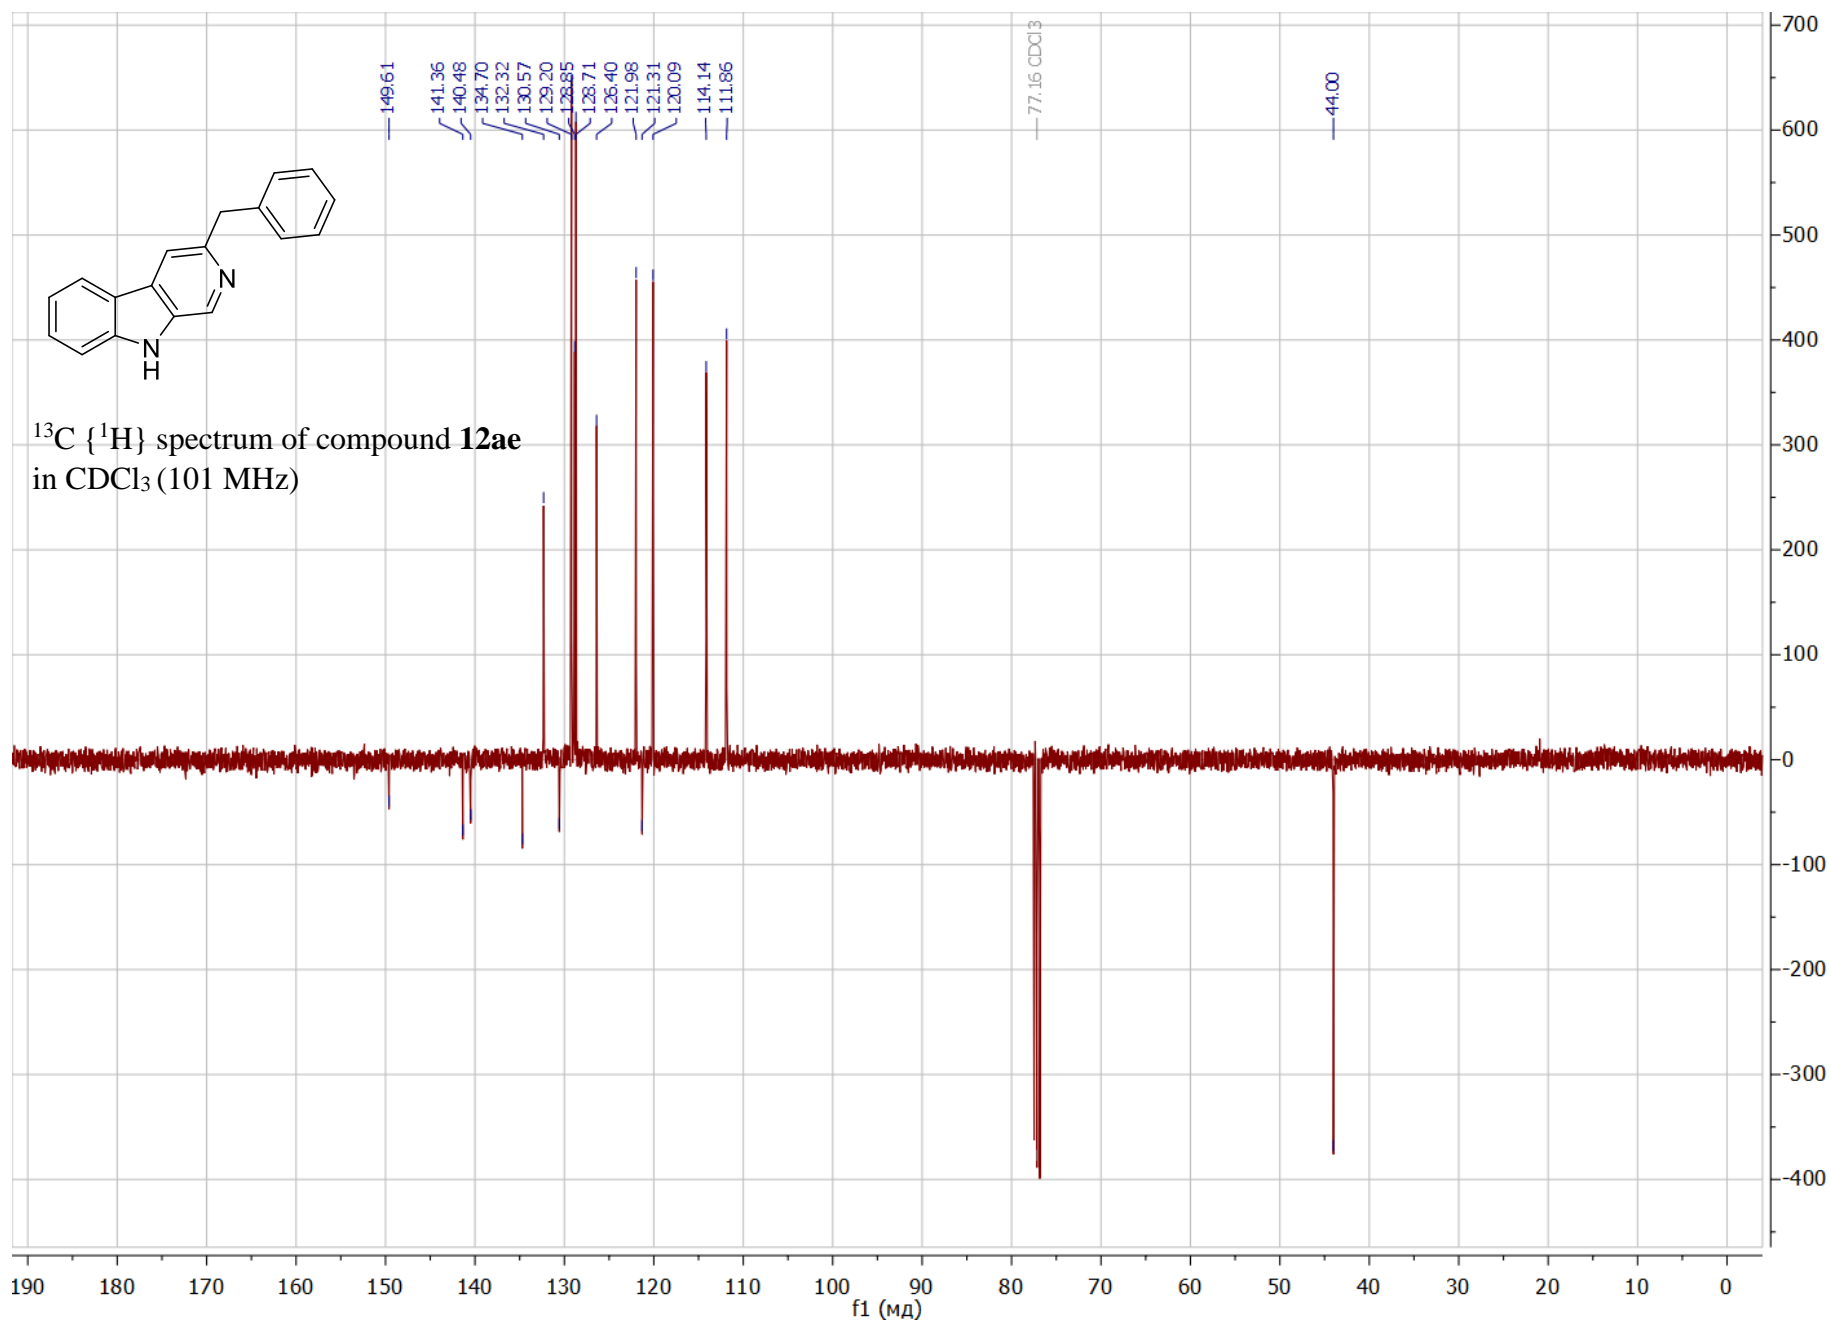

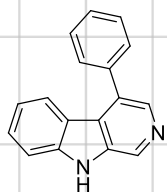

$^1\text{H}$  NMR spectrum of compound **12af**  
in  $\text{CDCl}_3$  (400 MHz)

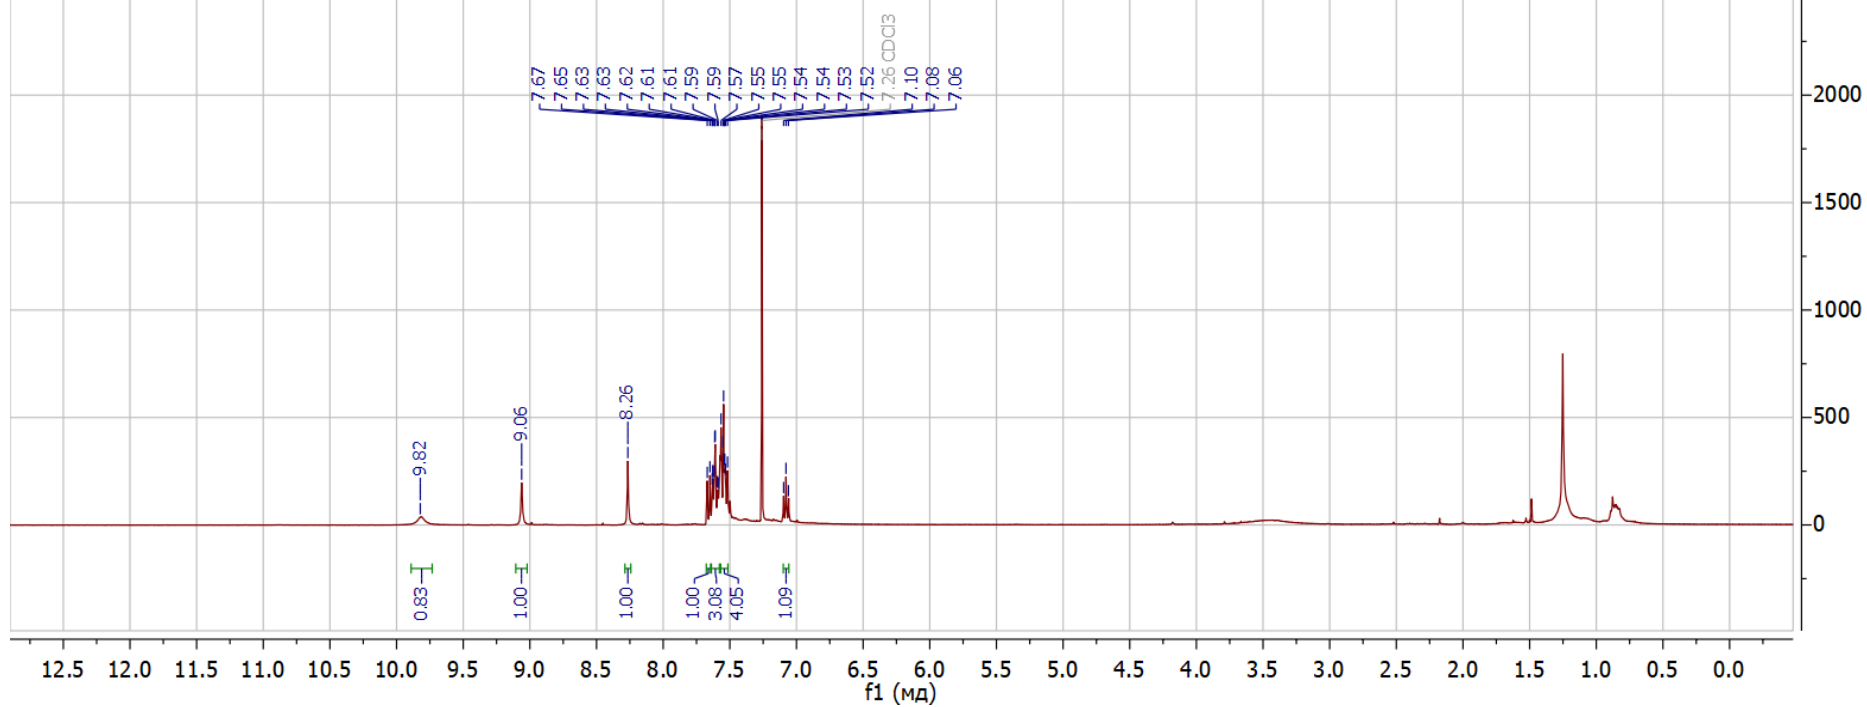

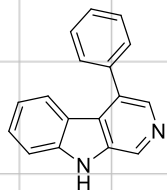

$^{13}\text{C}$  spectrum of compound **12af**  
in  $\text{CDCl}_3$  (101 MHz)

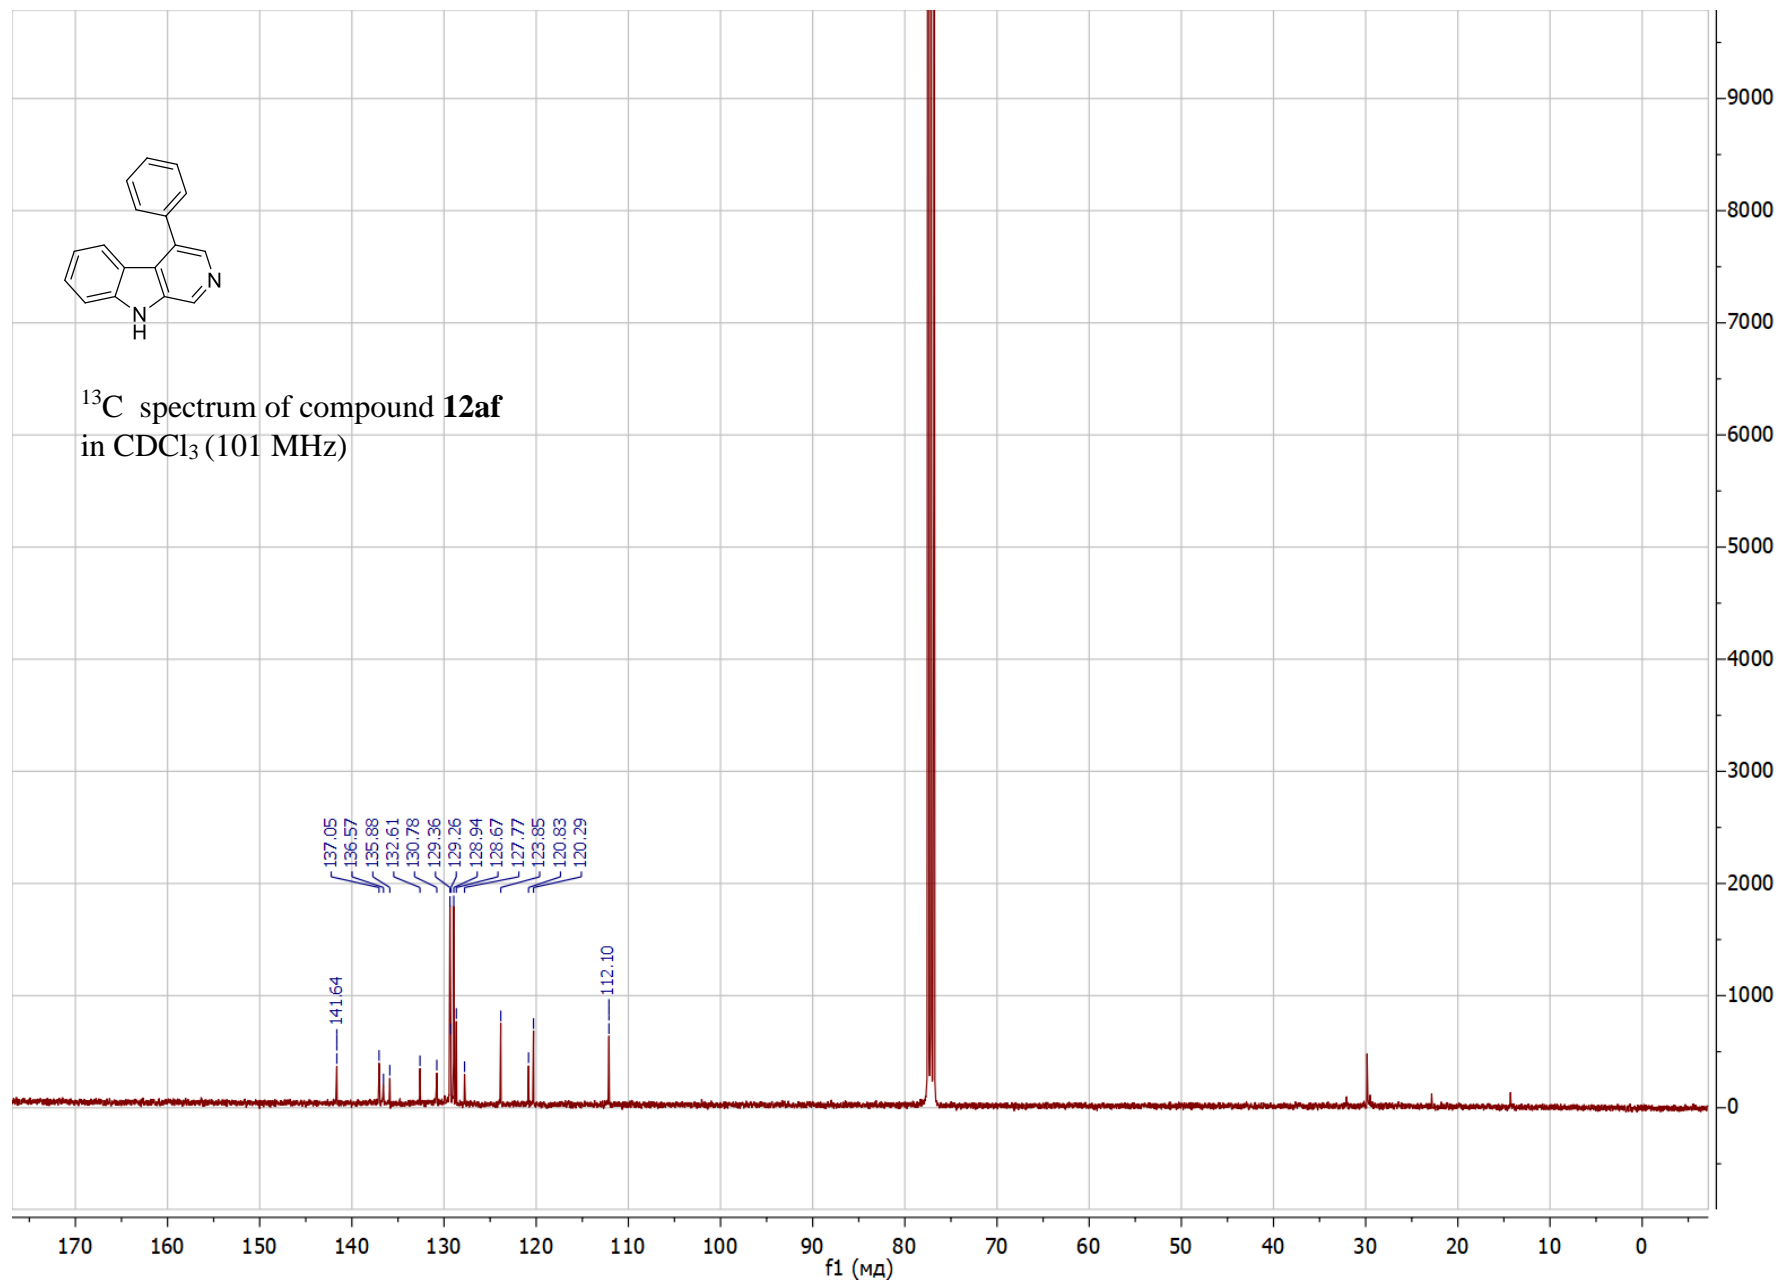

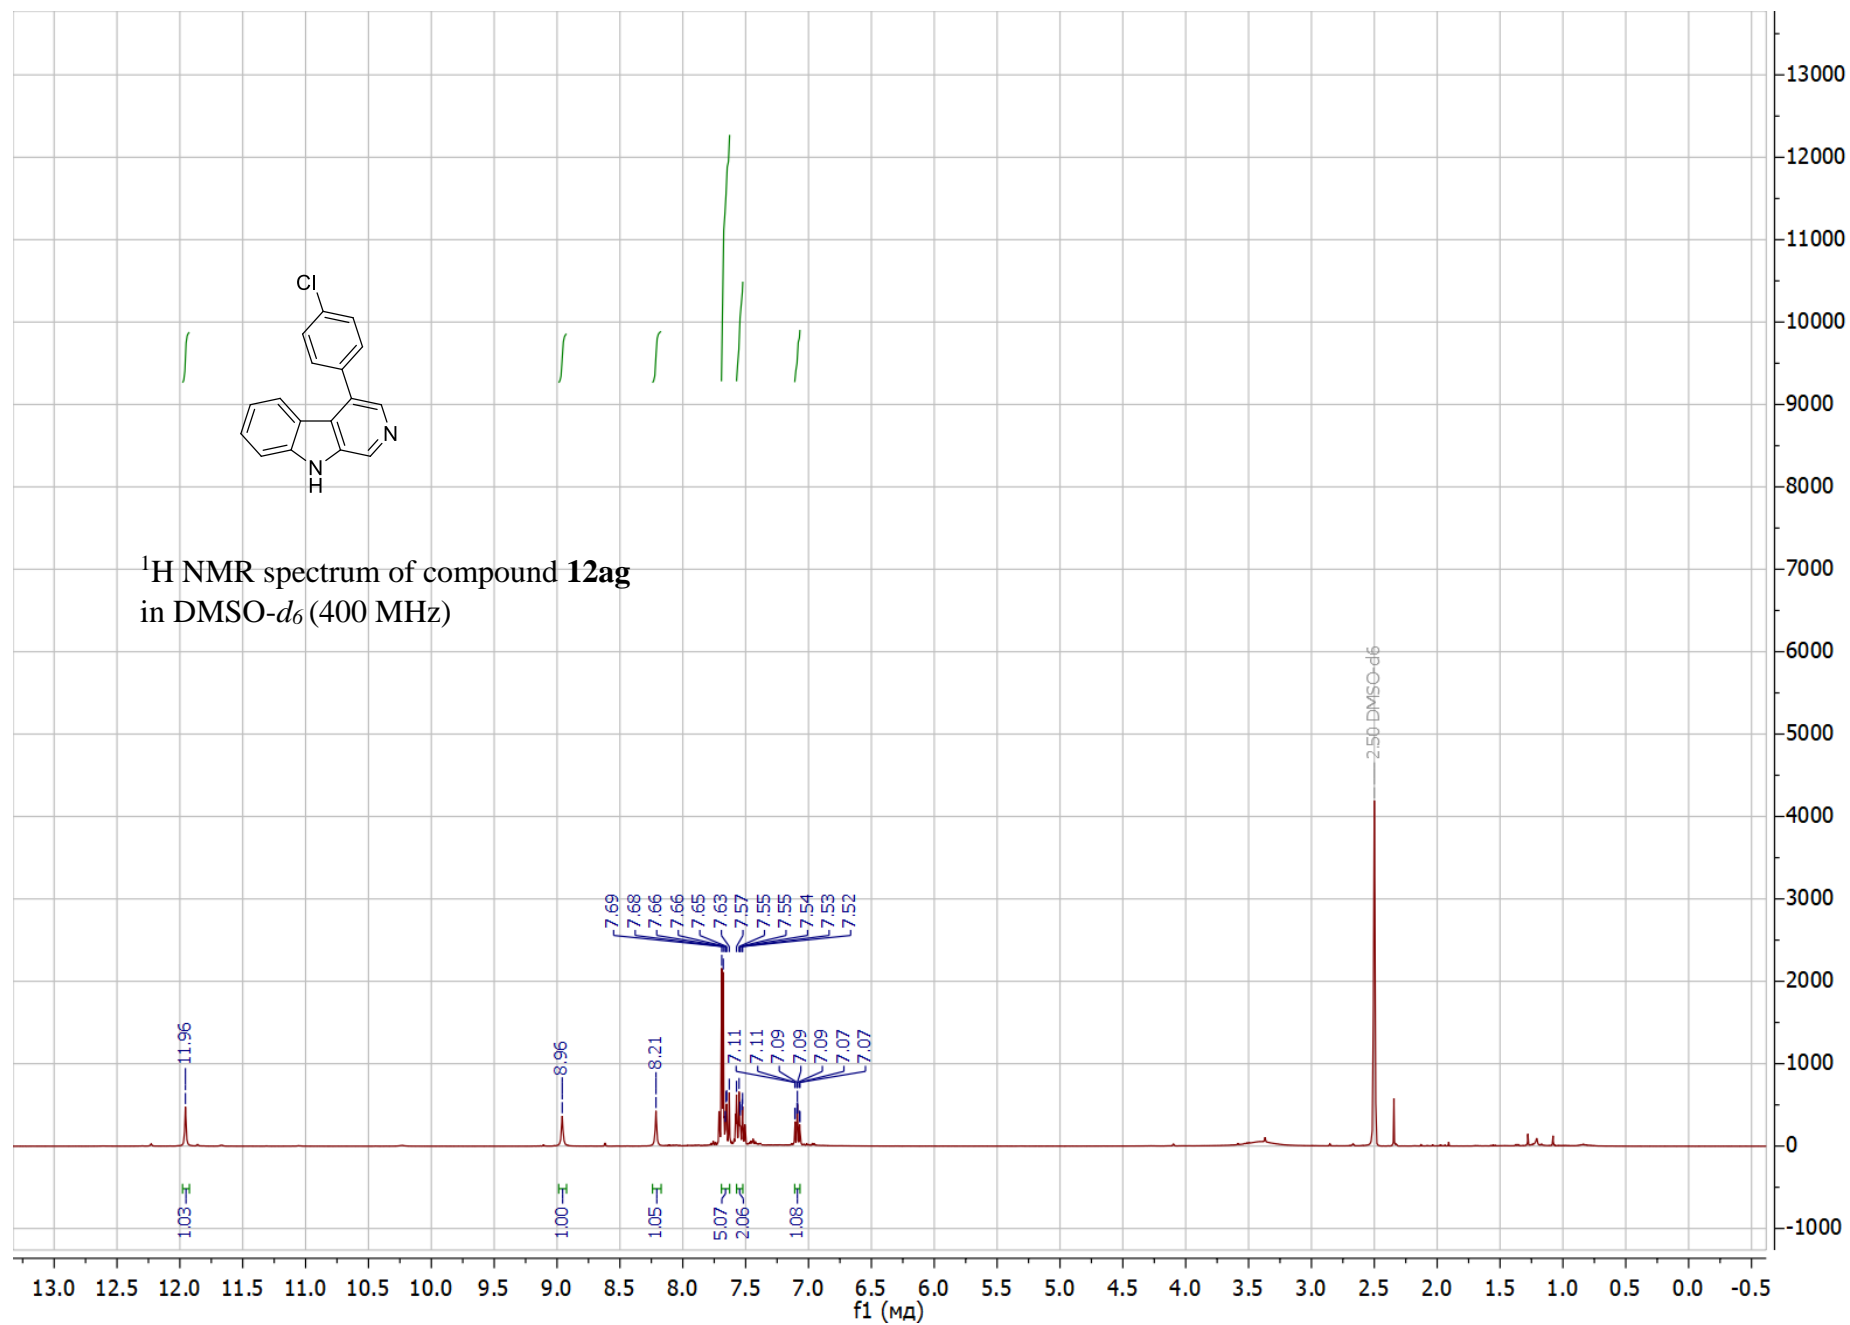

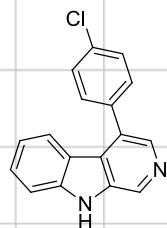

$^{13}\text{C}$  spectrum of compound **12ag**  
in DMSO- $d_6$  (101 MHz)

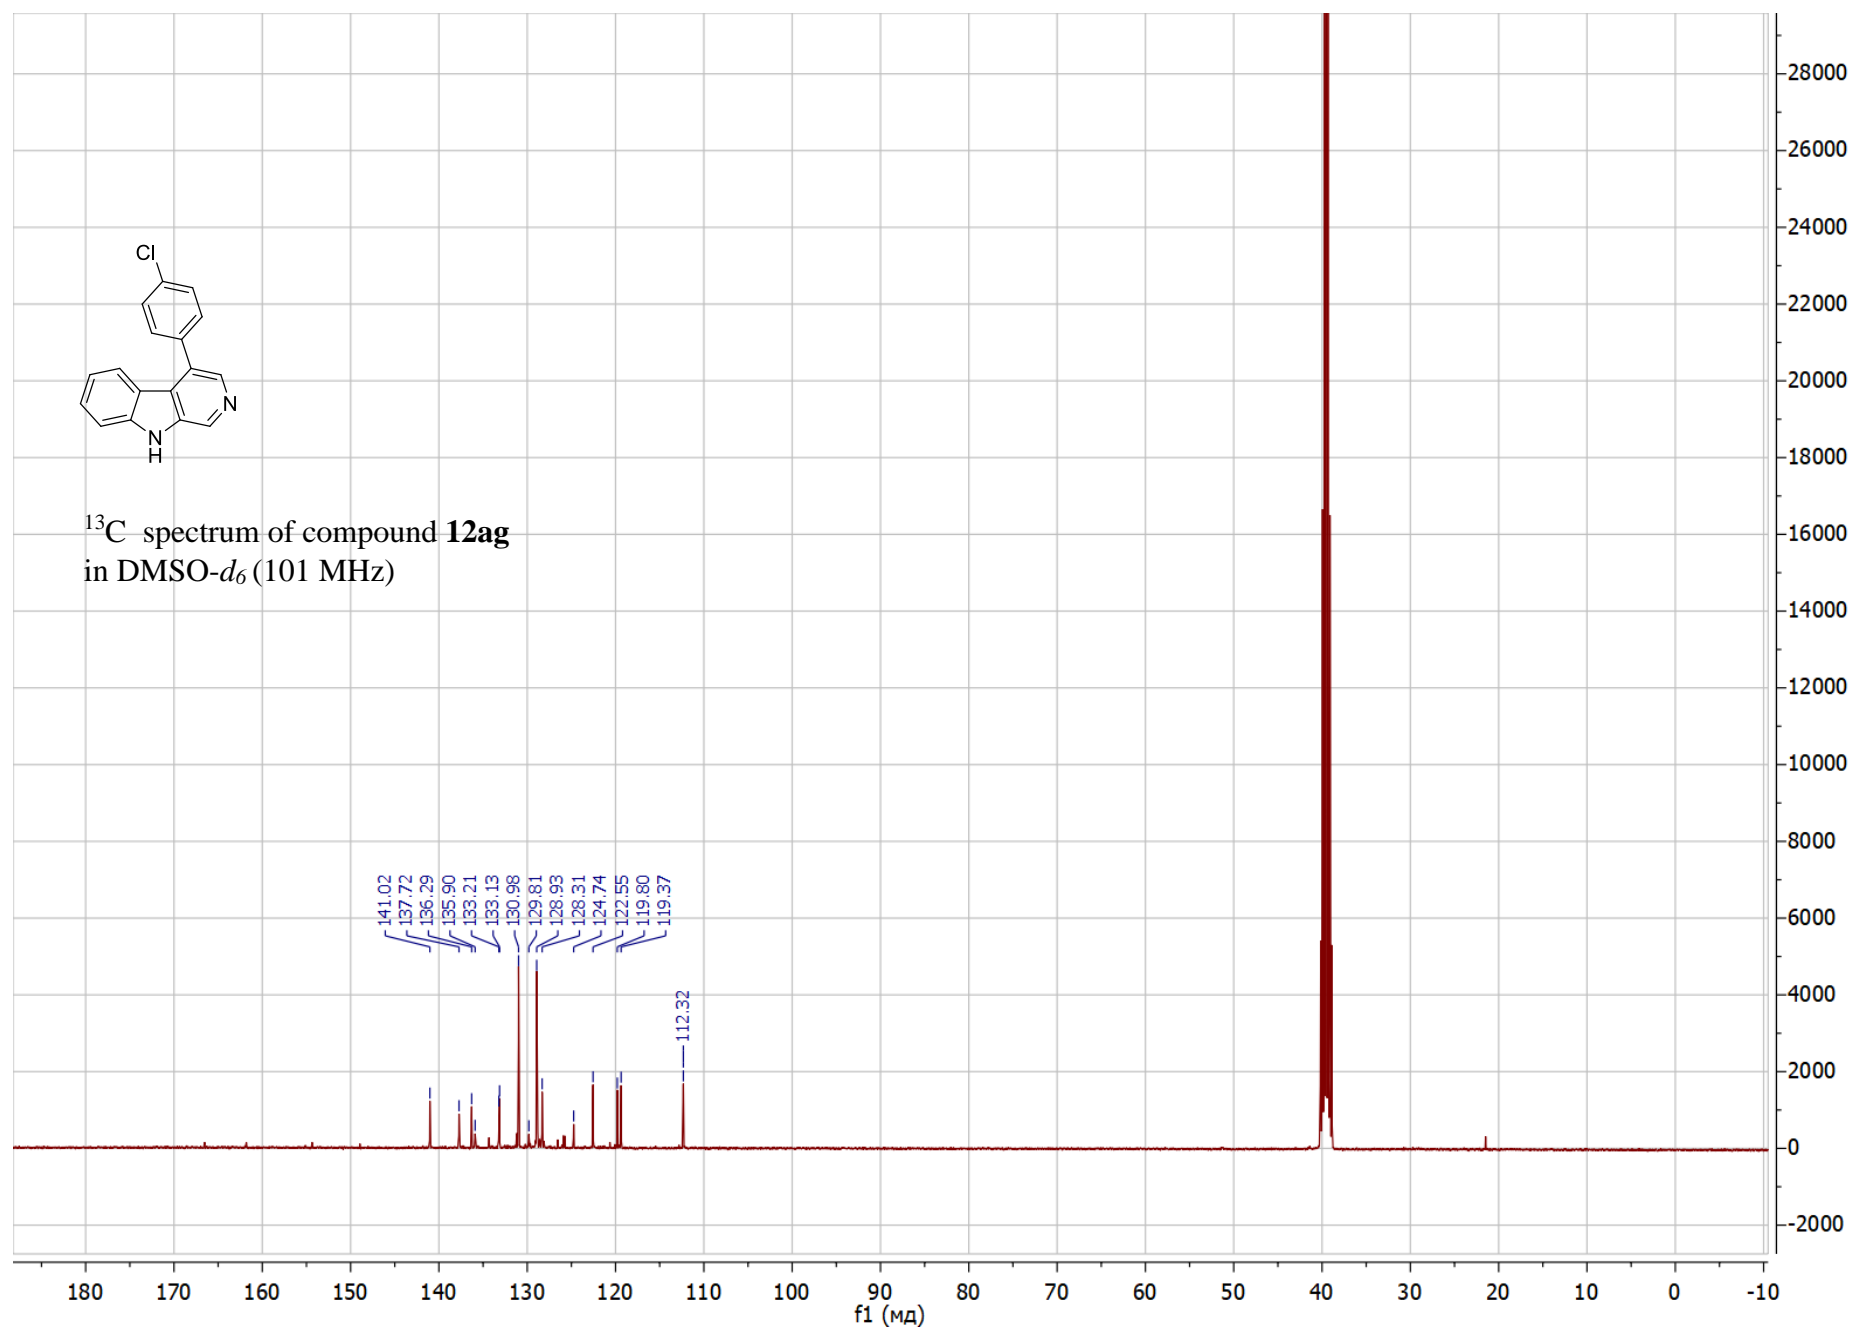





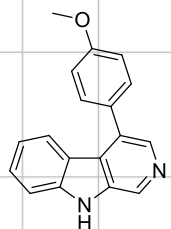

$^{13}\text{C}$  spectrum of compound **12ah**  
in  $\text{DMSO-}d_6$  (101 MHz)

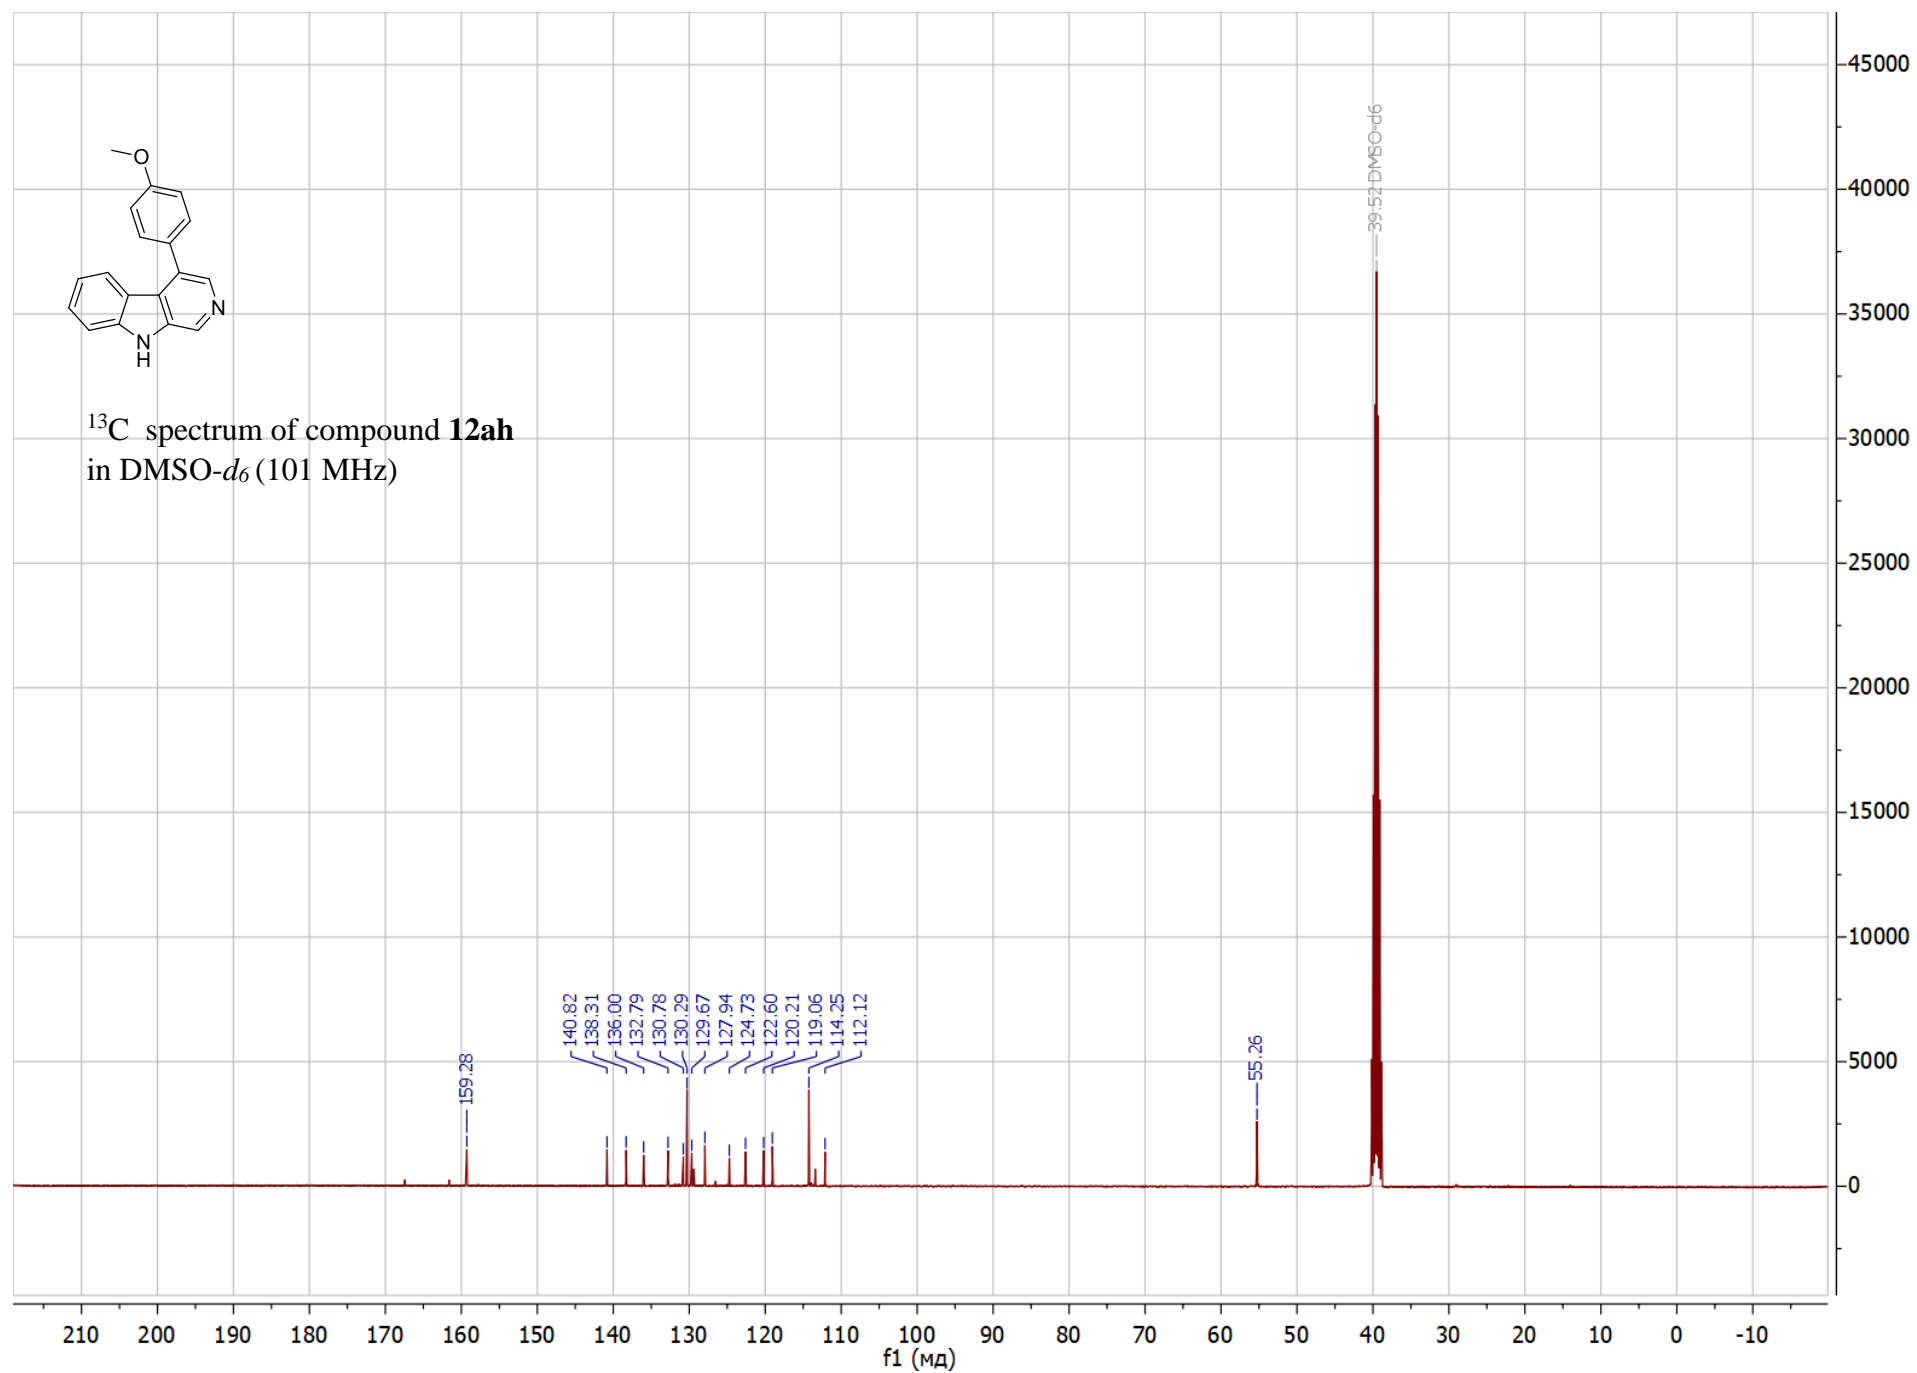

Supplement: s1 [file s1]
